# Supplementary material for: Investigation of Nrf2, AhR and ATF4 Activation in Toxicogenomic Databases
Source: Front Genet. 2018 Oct 2;9:429. doi: 10.3389/fgene.2018.00429 (PMC6176024; doi:10.3389/fgene.2018.00429)
Supplement: Supplementary file 3 [file Table_3.XLSX]

## Sheet: log2 Fold change Dataset_part3
Gene number										-0.0163062	2	0.163428	4	5	6	7	8	9	10	11	12	13	14	15	16	17	18	19	20	21	22	23	24	25	26	27	28	29	30	31	32	33	34	35	36	37	38	39	40
Pathway										ATF4	Nrf2	Nrf2	Nrf2	Nrf2	ATF4 Nrf2	Nrf2	AhR Nrf2	Nrf2	ATF4	ATF4	Nrf2	ATF4	ATF4	Nrf2	Nrf2	ATF4	Nrf2	ATF4	ATF4	Nrf2	Nrf2	AhR	Nrf2	ATF4	Nrf2	ATF4	Nrf2	Nrf2	Nrf2	Nrf2	ATF4	Nrf2	AhR	ATF4	ATF4	Nrf2	AhR	ATF4	Nrf2
Dataset	Species	Organ	Vitro/vivo	Bolus/Repeat	Condition	Harmonised compound name	Concentration qual.	Concentration (µM)	Time point	AARS	ABCB6	ABCC1	ABCC2	ABCC3	ABCC4	ABCC5	ABCG2	ABHD4	ACACA	ACAD8	ACAP2	ACOT2	ACOX2	ADAM23	ADCY1	ADM2	ADO	AFF1	AGAP1	AGPAT9	AHR	AHRR	AIFM2	AKAP2	AKAP7	AKNA	AKR1B10	AKR1C1	AKR1C2	AKR1C3	ALDH18A1	ALDH1A1	ALDH1A3	ALDH1L2	ALKBH5	ALS2	ALS2CL	AMACR	AMBP
TG-GATES	Human	Liver	vitro	bolus	TG-HVitro PHH - diazepam.Middle.8hr	Diazepam	M		8h	-0.0196856	0.0619484	-0.0165943	0.246435	-0.0177895	0.0682477	0.246081	-0.136995	0.16814	0.111823	0.11551	-0.0328689		-0.332325	0.116689	0.0678044	0.118602	0.341789	0.103699	-0.232943	-0.126457	0.301599	0.057792	-0.077618		-0.0631069	0.0601074	-0.532146	-0.0544657	-0.0746974	-0.0587221	-0.0702974	-0.161423	0.0171611	0.130233	0.0452479	-0.0529835	-0.0485444		-0.0114493
TG-GATES	Rat	Liver	vivo	repeat	TG-RVivoLiverRepeat - gentamicin.High.8day	Gentamicin	H		8d	0.092945	0.0619631		0.00778862	-0.00757689	0.263713	-0.0209174	0.130024	0.0694109	-0.444098	0.124431		-0.012623	-0.00607254						0.0330423		-0.093556	-0.203392	0.188607	-0.115901				-0.243365		0.0251372		0.835715					0.0246173	0.167041	-0.0143282
TG-GATES	Rat	Liver	vivo	bolus	TG-RVivoLiverSingle - nimesulide.Middle.24hr	Nimesulide	M		24h	0.0827343	0.0619822		0.454118	2.21661	0.313794	-0.0466847	0.167352	0.171612	0.141744	-0.129031		0.310527	0.0760329						0.0476255		-0.539537	0.0104443	0.369971	-0.10588				-0.323333		-0.123403		1.51659					0.0235901	-0.35491	-0.0319248
TG-GATES	Rat	Kidney	vivo	repeat	TG-RVivoKidneyRepeat - cephalothin.Middle.8day	Cephalothin	M		8d	0.0246132	0.0620101	0.0791951	0.474563	-0.0228954	0.171607	-0.421135	0.0572887	-0.0818189	-0.209316	-0.0614087	0.00503767	-0.0458635	-0.304894		-0.10387			0.256691	-0.0656927	0.0549485	0.217992	-0.0140852	-0.0969457	0.0763377				1.23555		-0.00980862		-0.206407				-0.043932	0.0522178	0.0916888	-0.222149
PREDICT-IV	Human	Liver	vitro	repeat	PIV Hvitro Repeat PHH - CHLPRZ_HD3_LFC	Chlorpromazine	H		3d	-0.268377	0.0620238	-0.0631503	0.0656789	0.227747	-0.40875	0.400295	0.0164459	-0.0386527	-0.375654	0.19694	0.228401	0.312452	0.370574	0.170052	0.486824	-0.276826	0.05176	0.201437	-0.0174553	-0.0589983	-0.140417	0.0322028	0.163297	-0.0402573	0.232642	0.0207287	0.0499797	-0.0915534	0.287175	0.160861	0.118923	-0.183105	0.45251	0.0805723	0.0652655	0.150563	0.367369	-0.116605	0.0188529
TG-GATES	Rat	Liver	vivo	bolus	TG-RVivoLiverSingle - ethanol.High.9hr	Ethanol	H		9h	-0.200381	0.0620995		-0.314551	0.0600145	0.0262723	-0.0589962	0.205076	-0.0856052	1.21859	0.175411		0.044985	0.0507002						0.0618701		-0.15342	0.0874691	0.486483	0.0293384				0.0451323		-0.434387		-0.108787					0.0037817	-0.0679449	0.0113898
TG-GATES	Rat	Liver	vivo	bolus	TG-RVivoLiverSingle - danazol.Low.9hr	Danazol	L		9h	0.163484	0.0621667		0.429676	0.152552	0.118225	-0.0649103	-0.607432	0.187343	-0.33587	-0.228428		-0.081071	-0.0954916						0.0326716		0.413724	0.000256446	0.344329	0.146022				1.57739		-0.210524		0.567806					-0.235797	0.418136	0.00495751
TG-GATES	Rat	Liver	vivo	repeat	TG-RVivoLiverRepeat - quinidine.Low.29day	Quinidine	L		29d	-0.0609175	0.0622126		0.132277	0.0156744	-0.160057	0.150694	-0.17793	0.092992	-0.0133785	-0.0187839		-0.00349153	0.122815						-0.134935		0.0833166	0.117268	-0.404631	-0.0446304				0.117894		0.0033755		0.331803					0.0314804	0.204541	-0.0210066
TG-GATES	Rat	Liver	vivo	bolus	TG-RVivoLiverSingle - tolbutamide.High.6hr	Tolbutamide	H		6h	0.0471191	0.0623961		-0.0708203	0.831963	-0.205812	0.119542	-0.0267603	0.137118	-0.284601	0.0442897		-0.00899058	0.378515						-0.102422		0.899029	-0.121313	-0.0421504	-0.017747				-0.361011		0.0314256		0.70647					0.11712	-0.618921	0.00925138
TG-GATES	Rat	Liver	vivo	repeat	TG-RVivoLiverRepeat - phenytoin.Low.8day	Phenytoin	L		8d	0.138789	0.0623987		0.0066128	0.27887	0.14257	-0.112857	-0.316602	0.0211722	0.226412	-0.0298572		-0.129012	0.552352						-0.00554764		-0.290449	0.110188	0.0508136	0.172214				0.0521382		-0.159794		-0.0385366					-0.0652728	-0.0789775	-0.016105
TG-GATES	Human	Liver	vitro	bolus	TG-HVitro PHH - valproic acid.Middle.2hr	Valproic acid	M		2h	-0.101255	0.0624092	0.191447	-0.157835	-0.0782756	-0.0470474	0.0161998	0.0452502	0.0926212	-0.0840838	0.134803	0.0955988		0.100927	-0.181021	0.00230273	-0.125509	0.354864	0.00297862	-0.0517296	0.0617484	0.181902	0.0156102	-0.0372994		0.175795	-0.0693508	0.00573772	0.0110168	-0.0428236	0.0388841	-0.0451814	-0.00734067	0.000788293	-0.0430897	0.0663598	0.134311	-0.0684925		0.0143652
TG-GATES	Rat	Liver	vitro	bolus	TG-Rvitro PRH - triazolam.Low.8hr	Triazolam	L		8h	-0.0156708	0.062426		0.034402	0.0342636	-0.0924472	-0.0375013	-0.0241694	0.00730716	0.0589857	-0.219593	0.0607606	0.0998782	-0.178345	0.0510028	0.0432757			-0.0739888	0.0462238	0.0611769	-0.128841	-0.156789	0.0757019	0.0717742				-0.0335532		-0.0549237		0.0185394				0.0317551	0.00520779	0.0563609	-0.00384789
TG-GATES	Rat	Liver	vivo	bolus	TG-RVivoLiverSingle - amiodarone.Middle.6hr	Amiodarone	M		6h	-0.325143	0.0624613		-0.374677	-0.00311066	0.0172746	-0.355326	-0.591513	-0.00483888	0.0491643	0.11321		0.105901	0.330302						0.0672224		0.356239	0.132578	0.223035	0.0711201				0.837839		-0.241592		-0.578082					-0.150417	0.0662999	0.013251
TG-GATES	Human	Liver	vitro	bolus	TG-HVitro PHH - diclofenac.Middle.2hr	Diclofenac	M		2h	0.0255965	0.0625429	0.383737	0.0527297	0.0531796	0.0867889	0.150863	0.0746341	0.00595351	-6.99769e-05	0.11423	0.166542		-0.00063118	0.0511225	0.0261181	0.153867	-0.0445097	0.0665138	-0.0407023	-0.0313438	0.105854	-0.208611	-0.0277254		0.068154	0.197774	0.193816	0.142749	0.037388	0.0356304	-0.048428	0.155975	0.0679407	0.0912591	0.0382864	0.0774501	-0.0239422		0.0446673
TG-GATES	Human	Liver	vitro	bolus	TG-HVitro PHH - tetracycline.High.24hr	Tetracycline	H		24h	0.160416	0.0626457	-0.0646079	0.335402	0.161152	0.189236	0.104259	0.0824768	0.108658	0.223679	0.183383	0.0769159		0.0847307	0.0326216	0.113842	-0.0696384	0.0669269	0.0110435	0.0227837	-0.0726372	0.128924	0.08423	0.0621795		0.106087	-0.0833436	-0.0524201	-0.0666584	0.000359407	0.00772167	0.201762	0.14987	-0.00200752	-0.0913887	0.0364888	0.234074	0.0747252		-0.0125696
TG-GATES	Rat	Liver	vivo	bolus	TG-RVivoLiverSingle - colchicine.Middle.3hr	Colchicine	M		3h	0.315174	0.0626974		0.279354	0.0468802	0.0531945	-0.00131602	0.235794	-0.0463283	-0.146203	-0.0486541		0.162869	0.0357827						0.0222602		0.629486	-0.0587106	0.0656851	0.183913				-0.0810644		-0.173159		0.212211					-0.0375968	-0.300789	0.0408699
TG-GATES	Human	Liver	vitro	bolus	TG-HVitro PHH - methapyrilene.Middle.2hr	Methapyrilene	M		2h	-0.0209712	0.0629371	0.105152	-0.0625186	-0.0902817	-0.100678	-0.077362	-0.0914686	0.0518261	0.0488251	-0.0627994	-0.0062264		-0.000612881	0.128235	0.156763	-0.0672613	-0.107481	0.112173	0.0524019	-0.0818171	0.192729	0.0148737	-0.0149607		0.00111873	-0.0546936	-0.125155	0.000219792	-0.056829	-0.0266307	-0.038484	-0.00700715	0.204447	-0.050598	0.0529441	0.0118679	0.040746		0.0639312
TG-GATES	Rat	Liver	vivo	bolus	TG-RVivoLiverSingle - danazol.High.6hr	Danazol	H		6h	0.0887452	0.0629403		0.270029	-0.343183	0.172702	-0.526281	-0.00352827	0.212114	0.217081	0.0934157		0.250647	-0.0239811						-0.00889127		0.459192	-0.323954	0.274608	0.252865				0.290603		-0.134618		-0.132464					-0.223523	0.394702	0.0345386
TG-GATES	Rat	Liver	vivo	bolus	TG-RVivoLiverSingle - disopyramide.Low.24hr	Disopyramide	L		24h	-0.0354046	0.0630404		-0.246153	0.381723	-0.192706	-0.0092158	0.0363497	0.0883018	0.142669	0.0836014		0.11767	0.29483						-0.201789		0.440975	0.034801	0.180782	0.0218237				0.0512175		0.0511352		1.02116					0.00529348	0.464271	-0.00179604
TG-GATES	Rat	Liver	vivo	bolus	TG-RVivoLiverSingle - meloxicam.High.6hr	Meloxicam	H		6h	-0.0950055	0.0631		-0.265737	-0.203508	-0.122183	0.10228	0.25062	-0.0228499	0.0364111	-0.0161415		0.195169	-0.0639932						-0.0884813		0.757932	0.11334	0.0640543	0.21822				0.51701		-0.23368		0.412787					0.362072	0.0802199	-0.0306803
TG-GATES	Rat	Liver	vivo	repeat	TG-RVivoLiverRepeat - methimazole.Low.15day	Methimazole	L		15d	-0.183491	0.0631246		-0.178127	1.35412	-0.296425	-0.128815	-0.763105	-0.179986	-0.471757	0.136186		-0.264066	-0.0133852						-0.118941		0.0421927	-0.0415484	0.182094	0.0856397				-0.175346		-0.221176		3.13384					0.0119204	0.042655	-0.0265326
TG-GATES	Rat	Liver	vivo	bolus	TG-RVivoLiverSingle - amphotericin B.Low.24hr	Amphotericin B	L		24h	0.102454	0.0631309		0.000179717	0.134994	0.17798	-0.200531	-0.291621	0.072339	0.243576	0.0243094		-0.0625904	0.0254747						-0.107537		0.274331	-0.15951	-0.118723	-0.0164676				-0.749253		-0.05379		-0.205898					-0.14785	0.0982007	0.00666055
TG-GATES	Human	Liver	vitro	bolus	TG-HVitro PHH - flutamide.High.8hr	Flutamide	H		8h	0.121573	0.0631718	-0.169457	0.282612	0.0166649	-0.164148	-0.503473	0.0478794	-0.090809	0.0771811	-0.170437	0.350235		-0.210587	0.0833435	-0.0128046	0.0800488	-0.349289	-0.0651474	0.153987	0.230501	0.283235	0.0629935	0.181612		-0.0777438	-0.17659	-0.347505	0.0253995	0.00357337	-0.0783167	-0.459353	-0.161205	0.41362	0.0436865	-0.0292917	-0.12855	0.347306		0.114981
TG-GATES	Rat	Liver	vivo	bolus	TG-RVivoLiverSingle - ranitidine.Low.24hr	Ranitidine	L		24h	0.0598787	0.0631788		0.0361096	0.310816	-0.117087	0.00346555	0.472723	0.131323	0.179459	0.0223186		0.404617	-0.141364						0.0302488		-0.242837	-0.0288613	-0.0897282	0.0217699				-0.311956		-0.318972		0.528765					-0.0666377	-0.124048	0.0128649
TG-GATES	Rat	Liver	vivo	repeat	TG-RVivoLiverRepeat - methylene dianiline.High.4day	Methylene dianiline	H		4d	-0.164199	0.0631858		-0.648035	4.21478	0.603573	0.24828	-0.980073	0.330553	-0.273595	-0.0220712		0.00689629	-1.92638						-0.160094		-0.186493	-0.128105	0.271837	0.0730996				-1.85585		-2.668		1.88379					-0.172152	-1.52041	-0.230219
TG-GATES	Rat	Liver	vitro	bolus	TG-Rvitro PRH - phenylanthranilic acid.High.8hr	Phenylanthranilic acid	H		8h	0.18328	0.0631909		0.414405	0.260545	0.179915	0.0298613	0.289723	0.169178	-0.107123	0.28769	0.187732	1.17405	0.428106	-0.169116	0.431831			0.280405	0.447131	0.358517	0.12315	-0.0995043	-0.146188	0.109654				-0.410587		0.0596142		0.139283				0.200263	0.0934177	0.109469	0.0690216
TG-GATES	Rat	Liver	vivo	repeat	TG-RVivoLiverRepeat - captopril.Low.29day	Captopril	L		29d	0.0504063	0.0632253		-0.0936957	0.166778	0.191371	-0.183423	-0.361227	0.0264535	-0.0499784	-0.052811		-0.0882366	0.572064						0.0102742		0.341176	0.0950382	0.0659449	-0.0509253				1.10356		0.191219		-0.00128232					0.0760994	-0.0285706	-0.0353773
TG-GATES	Rat	Liver	vivo	repeat	TG-RVivoLiverRepeat - mexiletine.High.8day	Mexiletine	H		8d	0.0958233	0.0632611		-0.349386	0.173033	0.0905918	-0.0697317	0.412258	0.207398	-0.158359	0.0488863		0.329703	0.684068						0.0797843		0.3616	-0.0296323	0.123573	-0.0619205				0.41281		-0.35745		0.298058					0.0663199	0.205237	-0.0444074
TG-GATES	Rat	Kidney	vivo	repeat	TG-RVivoKidneyRepeat - phenylbutazone.Middle.15day	Phenylbutazone	M		15d	0.0413025	0.0632623	0.130619	0.0989019	-0.0149023	0.15933	0.0760136	0.10819	0.0700132	0.0681228	-0.073214	0.176234	-0.079119	0.0764834		0.0264133			0.0133993	-0.0481763	0.00140186	0.0700141	0.0677178	0.0583602	0.103497				0.27644		0.120306		0.108309				-0.0430727	0.0650236	0.0360751	-0.0648458
TG-GATES	Rat	Kidney	vivo	repeat	TG-RVivoKidneyRepeat - captopril.Low.4day	Captopril	L		4d	0.0356907	0.0632942	-0.0079037	0.0825827	0.174923	-0.0200294	-0.0349138	-0.0716349	-0.0163766	0.135481	0.00826674	-0.213281	0.171309	-0.151322		0.192367			0.0388703	-0.0138338	0.0303332	-0.162555	-0.255823	0.225419	0.127308				0.905105		-0.0910084		-0.090983				0.00258362	-0.0597704	0.0701488	0.0883749
TG-GATES	Rat	Liver	vitro	bolus	TG-Rvitro PRH - acetamidofluorene.Low.8hr	Acetamidofluorene	L		8h	-0.0586492	0.0632994		0.045992	0.182253	0.034128	-0.0660691	-0.138095	0.0181114	0.0993721	-0.00509137	0.0598746	0.321078	0.243565	0.100329	-0.0916317			-0.116097	-0.064936	0.00995943	-0.298886	-0.0173144	-0.164867	-0.173411				0.19451		-0.313634		0.093666				-0.0930151	0.0746469	0.0835658	0.00879225
TG-GATES	Rat	Liver	vivo	repeat	TG-RVivoLiverRepeat - naphthyl isothiocyanate.Low.4day	Naphthyl isothiocyanate	L		4d	0.0123094	0.0633099		0.0169719	0.242514	0.054304	0.236152	-0.388061	0.114482	0.154647	0.142097		0.112469	0.231894						-0.00518188		-0.052241	-0.00973881	0.151053	-0.056003				1.21192		0.099312		0.258487					0.0463163	-0.148326	-0.00760327
TG-GATES	Rat	Liver	vivo	repeat	TG-RVivoLiverRepeat - captopril.Middle.4day	Captopril	M		4d	-0.0465262	0.0633374		-0.12954	-0.402416	0.079618	0.0536004	-0.307649	-0.0704233	-0.0100059	0.0564319		0.09984	0.77677						-0.0515256		-0.113066	0.193548	-0.0277312	0.112997				-0.444407		-0.0368169		0.47105					0.107008	0.193964	-0.0298831
TG-GATES	Rat	Liver	vivo	repeat	TG-RVivoLiverRepeat - haloperidol.High.4day	Haloperidol	H		4d	0.171954	0.0633883		-0.915488	0.407018	0.19842	-0.0435938	-0.545159	-0.089432	0.263141	-0.145336		-0.220679	0.101454						-0.0486423		-0.423617	0.0304923	0.563721	0.0320772				-1.07003		-0.218365		1.4232					0.113684	0.0338178	0.0615296
TG-GATES	Human	Liver	vitro	bolus	TG-HVitro PHH - interleukin 6, human.Middle.24hr	IL6	M		24h	0.218205	0.0634124	0.00747875	0.10511	0.0988438	-0.364479	-0.116881	-0.8309	-0.191405	0.22983	-0.000506505	0.00685591		0.318111	0.115888	0.101363	-0.037162	0.0127827	0.0999418	-0.23703	-1.0361	-0.227482	0.126436	0.014174		0.3162	0.697294	-0.956527	-0.178083	-0.0326025	0.00182644	0.222376	0.604981	0.228551	-0.0255545	0.0762117	-0.181875	-0.258247		0.0792463
TG-GATES	Rat	Liver	vivo	bolus	TG-RVivoLiverSingle - enalapril.High.9hr	Enalapril	H		9h	-0.0338293	0.0635261		-0.339682	0.319247	-0.115789	0.0366868	-0.249155	0.012491	-0.537844	0.0149445		0.507798	-0.457206						-0.0563065		-0.213552	0.167155	-0.0232397	-0.201908				1.28394		-0.520129		0.0180867					0.0418465	-0.0244579	-0.00903167
TG-GATES	Rat	Kidney	vivo	bolus	TG-RVivoKidneySingle - allopurinol.Low.24hr	Allopurinol	L		24h	0.0509921	0.0635744	0.0936235	0.0372352	0.0995216	-0.0207846	-0.248508	0.0286548	0.0543587	0.125494	0.0790204	0.0602212	0.0255178	-0.201341		-0.187314			-0.052474	-0.0243176	0.0190164	0.0724883	-0.0793111	0.107669	0.0562661				0.257112		-0.188054		0.101374				-0.000757601	0.0350669	0.0411354	-0.0574936
TG-GATES	Rat	Liver	vivo	bolus	TG-RVivoLiverSingle - carbon tetrachloride.Low.24hr	Carbon tetrachloride	L		24h	-0.0847926	0.0635862		-0.134931	0.105113	-0.0974549	-0.214406	0.227457	0.0296739	-0.106773	-0.0467905		0.304792	0.925967						0.089268		-0.0507272	0.0937814	0.166245	-0.0375081				-0.0966852		0.0391187		0.10408					-0.0427447	-0.242956	0.0047515
TG-GATES	Human	Liver	vitro	bolus	TG-HVitro PHH - phenylbutazone.Middle.2hr	Phenylbutazone	M		2h	0.0505796	0.0635999	0.159978	0.0356569	0.00810558	0.00162704	0.0876378	-0.0373451	-0.0463827	0.067737	0.0376016	-0.0256729		0.00683422	0.0676588	-0.0131778	0.0409115	-0.0582269	-0.0819076	-0.0641699	0.00576886	0.28241	-0.0371483	-0.106243		-0.0186338	0.0951285	0.142818	0.0929462	0.0578077	0.0953931	0.0322379	0.254494	-0.0418691	0.0363789	-0.129435	-0.0114298	-0.184042		0.0240589
TG-GATES	Rat	Kidney	vivo	bolus	TG-RVivoKidneySingle - allopurinol.Middle.24hr	Allopurinol	M		24h	0.0694706	0.0636201	0.0504685	0.151303	0.0617693	0.0177967	-0.134266	0.00852016	0.0658634	0.0886901	0.180265	-0.137039	0.170398	-0.279282		-0.203013			-0.0143281	-0.0206914	0.0337117	0.114387	-0.237283	0.125051	0.00580229				0.713145		-0.04636		-0.0111795				0.0321701	-0.0366286	0.0403524	-0.0737465
TG-GATES	Rat	Liver	vivo	bolus	TG-RVivoLiverSingle - ethinylestradiol.High.6hr	Ethinylestradiol	H		6h	-0.00232832	0.0636304		-0.184393	0.023581	-0.197411	0.0693253	-0.01915	-0.0978458	-0.500084	0.0567538		-0.253907	-0.840065						-0.0577069		0.0689876	-0.128123	0.384265	-0.0555487				0.476494		-0.0569043		0.0482212					-0.0975895	0.597535	-0.017795
TG-GATES	Human	Liver	vitro	bolus	TG-HVitro PHH - benzbromarone.High.2hr	Benzbromarone	H		2h	0.112159	0.0636387	-0.0354419	0.0563967	0.116226	-0.196313	0.0491519	-0.0133822	0.0128076	-0.0555783	-0.00046565	-0.0999336		0.0317633	0.138712	0.0883444	0.222	-0.105972	0.0100676	-0.198697	-0.176346	0.0196498	0.0679348	-0.0613961		0.0721686	-0.114727	0.0907237	-0.0143135	0.00424609	0.00609765	0.120398	-0.0134703	-0.156552	0.0370386	-0.0853849	-0.0829194	0.104885		0.0274245
TG-GATES	Rat	Kidney	vivo	repeat	TG-RVivoKidneyRepeat - carboplatin.Low.4day	Carboplatin	L		4d	0.0263354	0.0638495	0.130531	-0.0615071	-0.138359	0.0156262	0.179549	-0.00285196	0.115329	0.202648	-0.12277	-0.0743623	0.0083715	0.0801917		-0.0388091			-0.122331	-0.0373936	-0.01506	0.145609	0.0507222	0.142709	-0.132827				0.0116919		0.0654312		-0.0444648				-0.0116061	0.00649703	-0.162107	-0.017536
TG-GATES	Rat	Liver	vitro	bolus	TG-Rvitro PRH - disopyramide.Low.2hr	Disopyramide	L		2h	0.065208	0.0639474		0.00900525	-0.0607176	0.0936956	0.129418	-0.00409772	-0.0770738	-0.0613735	-0.044652	0.00896575	0.0532625	0.17019	-0.0948591	0.0285512			0.1572	0.0577785	0.0743387	0.0439772	-0.100851	0.0272562	0.00803581				0.473118		-0.0275753		-0.0191118				-0.086276	-0.168371	0.138157	0.00502302
TG-GATES	Rat	Liver	vivo	repeat	TG-RVivoLiverRepeat - methyldopa.Low.15day	Methyldopa	L		15d	-0.030029	0.0639636		0.0474705	0.231968	-0.103448	-0.00468298	-0.0755742	-0.046782	-0.152093	0.0414734		0.303124	-0.0589155						-0.0623606		-0.422337	0.0512743	0.0656427	-0.108438				-0.757846		-0.0677518		0.729596					-0.0112396	-0.297237	0.0331483
TG-GATES	Rat	Liver	vivo	repeat	TG-RVivoLiverRepeat - ibuprofen.Low.15day	Ibuprofen	L		15d	0.0182099	0.0639647		0.00287431	-0.0550593	-0.12471	-0.0561619	0.0211999	-0.108594	0.178774	0.0955346		0.000498378	0.0825529						0.150304		0.112817	-0.00302939	0.402631	0.0954304				0.277693		0.171348		-0.737731					-0.0434539	0.122452	-0.0169204
TG-GATES	Rat	Kidney	vivo	repeat	TG-RVivoKidneyRepeat - carboplatin.High.29day	Carboplatin	H		29d	-0.0635757	0.0639661	0.323335	1.13259	0.242119	0.462337	0.331842	-0.306667	0.302219	-0.0994936	-0.0133549	0.0354039	0.0991631	-0.071356		-0.378973			0.11608	-0.178564	0.161352	0.252081	-0.0599085	-0.00169765	-0.0515772				0.148107		-0.181566		0.313619				-0.133274	0.112574	-0.217108	0.205077
TG-GATES	Rat	Liver	vivo	repeat	TG-RVivoLiverRepeat - azathioprine.High.8day	Azathioprine	H		8d	-0.280192	0.0639832		-0.189775	0.278895	-0.0718758	0.00915796	-0.129401	-0.160334	-0.269966	-0.184302		0.0203337	-1.16295						0.030216		-0.321674	-0.0536409	0.0608461	-0.0703208				-1.25268		-0.32617		1.68234					-1.62776e-05	0.141901	-0.0238675
TG-GATES	Rat	Kidney	vivo	repeat	TG-RVivoKidneyRepeat - methyltestosterone.High.4day	Methyltestosterone	H		4d	0.11863	0.0640845	0.0645829	0.134739	-0.0302702	0.00380014	0.102963	-0.0919982	-0.0225159	0.270824	-0.0266509	0.270718	-0.0253082	0.244847		0.46417			-0.0441241	-0.0835172	0.059586	0.143502	0.251465	0.00449232	0.087147				0.115706		0.0895345		-0.310041				0.0764219	0.258055	0.229569	-0.112064
TG-GATES	Rat	Liver	vivo	bolus	TG-RVivoLiverSingle - bendazac.Middle.6hr	Bendazac	M		6h	0.142378	0.0641136		0.451615	0.477531	0.352162	0.0896497	-0.0391231	-0.0785869	-0.144376	0.108811		0.730578	-0.324695						0.0114259		0.0856635	0.0232024	0.0467062	0.0950981				0.512071		-0.110256		0.849415					-0.0201472	-0.260651	-0.0201381
TG-GATES	Human	Liver	vitro	bolus	TG-HVitro PHH - phorone.Low.8hr	Phorone	L		8h	0.0199062	0.0641208	0.0955675	0.0990815	-0.0568523	0.0338031	0.00719572	0.0613245	0.178369	-0.0592936	0.0821703	-0.0512753		-0.124539	0.0579549	-0.00555456	0.02495	0.0498293	-0.00609075	-0.0159174	0.179932	-0.0558734	0.144651	0.138176		-0.0231499	-0.110815	0.320303	-0.00883849	0.0174172	0.01404	-0.00672778	-0.159569	0.0491217	0.02573	0.0057774	0.144918	0.0864128		0.0204788
TG-GATES	Rat	Liver	vivo	repeat	TG-RVivoLiverRepeat - enalapril.Low.29day	Enalapril	L		29d	0.00980005	0.0643023		0.196043	-0.218207	0.0647856	-0.0769784	-0.0909124	-0.0846195	0.0453503	0.0625243		0.304368	0.315996						0.0649986		-0.364917	-0.0340628	0.163844	-0.00535486				0.989032		0.111279		0.212349					-0.140551	0.0575723	-0.0221403
TG-GATES	Rat	Liver	vivo	bolus	TG-RVivoLiverSingle - mexiletine.Middle.24hr	Mexiletine	M		24h	-0.0345382	0.06436		0.0701675	-0.0972132	-0.0405449	-0.0768802	-0.0052675	0.0069052	0.34897	-0.0373157		0.0556804	-0.275699						-0.0424342		0.0443871	0.0301958	0.208747	0.118005				0.573109		0.377968		0.034696					-0.108008	-0.0396435	-0.00709693
TG-GATES	Rat	Liver	vivo	bolus	TG-RVivoLiverSingle - disopyramide.Middle.6hr	Disopyramide	M		6h	-0.0864881	0.0643604		0.171785	0.127731	-0.0832382	-0.037824	-0.0476925	0.0413035	0.0584813	0.14863		-0.0957486	-0.501892						-0.0337322		1.03365	0.23368	0.0241693	-0.031971				0.494762		0.113885		0.386318					0.158927	0.215336	-0.0187421
TG-GATES	Rat	Liver	vitro	bolus	TG-Rvitro PRH - allopurinol.High.8hr	Allopurinol	H		8h	-0.0473981	0.0643624		0.073595	-0.0131643	0.0129186	0.125111	0.0715743	0.0774404	0.0965239	0.0747347	-0.136604	-0.039147	-0.254269	-0.110734	-0.16234			-0.0638787	-0.16807	-0.0801567	-0.0892003	0.0360708	-0.0241571	0.103135				-0.00304174		-0.117315		-0.118892				0.049371	0.0810065	-0.012741	0.0060415
TG-GATES	Rat	Liver	vivo	repeat	TG-RVivoLiverRepeat - diltiazem.Middle.29day	Diltiazem	M		29d	-0.0740318	0.0643696		0.358341	0.638617	0.226311	-0.0698952	-0.0546607	-0.0633538	0.184509	-0.0387189		-0.162699	-0.367472						-0.0846282		-0.257317	0.0740085	-0.141852	0.031412				0.157357		0.264935		1.56976					-0.0944808	-0.304928	-0.00180933
TG-GATES	Rat	Liver	vivo	repeat	TG-RVivoLiverRepeat - rotenone.High.8day	Rotenone	H		8d	0.0640301	0.06439		-0.0679786	0.252557	0.109652	-0.153417	0.20526	0.0974726	0.456351	-0.253985		0.220041	0.400261						0.0120989		-0.467416	0.0753477	0.0592121	0.129144				0.171617		-0.225465		1.49093					0.172274	-0.0378951	-0.0321805
TG-GATES	Rat	Kidney	vivo	repeat	TG-RVivoKidneyRepeat - omeprazole.Low.4day	Omeprazole	L		4d	-0.0873876	0.0644665	0.0236141	0.0277058	-0.00153647	-0.0377699	0.046203	0.0554145	-0.0432883	0.00488771	0.122808	-0.0537711	-0.064771	0.397622		-0.228085			-0.10493	0.00851746	0.107388	-0.000580528	-0.0789152	-0.0171774	-0.102714				0.0602806		0.0740455		0.025783				-0.0850801	0.213788	0.152172	0.175247
TG-GATES	Rat	Kidney	vivo	bolus	TG-RVivoKidneySingle - methyltestosterone.Middle.3hr	Methyltestosterone	M		3h	0.0312412	0.064479	0.0397094	0.00445811	0.104948	-0.141415	0.0128927	-0.107137	-0.0509328	0.106647	-0.0277065	-0.00667785	-0.0435398	-0.184065		0.0304829			0.116456	-0.0653216	-0.0398026	-0.239637	-0.0173555	-0.0777885	0.0505242				-1.34226		0.0632208		0.095746				0.00177363	-0.351131	0.043735	-0.0511774
TG-GATES	Rat	Kidney	vivo	bolus	TG-RVivoKidneySingle - cyclosporine A.Middle.24hr	Cyclosporine A	M		24h	-0.0629044	0.0644852	-0.148871	0.403469	0.191267	0.0559432	-0.286688	-0.28751	-0.151988	-0.139353	-0.232492	-0.114731	0.362135	0.497606		-0.699983			0.0956277	-0.126662	0.201699	-0.295136	-0.281821	-0.125672	-0.0915029				-1.07905		-0.0743205		0.0604874				-0.0989662	-0.225366	0.151473	-0.132009
TG-GATES	Rat	Liver	vivo	repeat	TG-RVivoLiverRepeat - acetazolamide.Low.29day	Acetazolamide	L		29d	-0.16115	0.0645744		-0.184639	0.00724938	-0.101206	0.0195765	0.527726	-0.104332	-0.268433	0.146179		0.0472867	-0.38358						-0.0279463		-0.273469	-0.00803473	-0.159023	-0.170638				0.39767		-0.00331506		0.591737					-0.0355554	-0.235099	0.0105732
TG-GATES	Rat	Kidney	vivo	repeat	TG-RVivoKidneyRepeat - monocrotaline.Middle.15day	Monocrotaline	M		15d	0.0815318	0.0647235	-0.0474937	-0.0440232	0.00581739	0.0103214	-0.23997	-0.0522804	0.04762	-0.039847	0.0137224	0.0782717	0.0668326	0.358909		-0.371456			0.051215	0.0278444	0.0312631	0.177706	0.0469791	-0.17665	-0.0413843				-1.13037		0.0104797		0.145258				-0.086427	0.075576	0.00550368	0.120189
TG-GATES	Rat	Kidney	vivo	repeat	TG-RVivoKidneyRepeat - phenylbutazone.Middle.4day	Phenylbutazone	M		4d	-0.0567222	0.0647696	0.208399	0.215684	0.0895229	-0.108119	0.190932	0.0325979	-0.0326913	-0.00024003	-0.130838	-0.0308975	-0.272164	0.281096		-0.0666278			0.0424281	0.0199497	-0.0191403	-0.164509	0.0361718	0.0223765	0.0127384				-0.532003		-0.0949794		0.0703903				-0.0140927	-0.183886	0.164204	-0.110749
TG-GATES	Human	Liver	vitro	bolus	TG-HVitro PHH - rotenone.Middle.24hr	Rotenone	M		24h	-0.0101471	0.0647947	0.0210398	0.0245212	0.027211	-0.0441676	-0.0417782	0.0120876	-0.000903785	0.0671974	0.0534717	-0.00769647		-0.0528973	0.0793269	0.0657063	0.0586619	-0.0861441	-0.0754936	0.0239952	0.0160577	0.0857868	-0.204746	0.00700787		-0.0890582	0.00782327	-0.0719614	-0.00118418	0.000732128	-0.0050519	0.000819172	0.0018665	-0.0647976	-0.00980917	-0.0133546	-0.0104167	-0.0573162		0.00762474
TG-GATES	Human	Liver	vitro	bolus	TG-HVitro PHH - gemfibrozil.High.24hr	Gemfibrozil	H		24h	0.0384807	0.0648072	-0.064408	0.0694659	0.0271684	0.178029	0.0986197	0.337962	0.14629	0.0700256	-0.0225637	0.00537469		0.0828966	-0.00799497	-0.150995	-0.0452253	0.100193	-0.0611608	0.0474143	0.296845	-0.063186	0.0278596	0.0214828		-0.0598477	0.302561	0.109123	0.0801309	0.0296265	0.0355423	0.00618756	-0.114661	-0.079087	-0.0668657	0.014529	0.122913	0.0960392		0.0343313
TG-GATES	Human	Liver	vitro	bolus	TG-HVitro PHH - methyltestosterone.Low.24hr	Methyltestosterone	L		24h	0.0158756	0.0648294	-0.137141	-0.0243315	0.0311015	-0.150472	0.0356439	-0.107714	0.0288346	0.0345623	-0.039539	0.0072286		0.0200566	-0.15781	0.121945	0.0463731	-0.0390663	0.00189605	0.0501947	-0.190463	-0.0246895	0.136283	0.0819113		-0.163932	0.10721	-0.440945	0.00742931	-0.0216718	-0.0440014	-0.000105502	-0.240577	0.0143383	-0.0128404	0.0484101	-0.00499827	-0.0395483		-0.0121343
TG-GATES	Human	Liver	vitro	bolus	TG-HVitro PHH - enalapril.Middle.24hr	Enalapril	M		24h	-0.0153991	0.0648675	0.186521	0.191427	0.141392	0.0817786	0.0630146	0.167949	0.0437161	0.0206906	-0.00342288	0.0143115		0.0246339	0.111793	0.0670548	-0.0510049	-0.00968199	-0.0952786	0.108255	0.402563	-0.0110475	0.0877486	-0.0187998		-0.202608	0.169314	0.0735844	0.0389631	0.0676003	-0.0207547	0.0670132	0.0554262	-0.260698	0.069182	0.00763958	-0.0310448	-0.0279054		0.0369219
carcinoGENOMICS	Rat	Kidney	vitro	bolus	CX RVitro NRK Aristolochic acid 6h (1.65uM)	Aristolochic acid	IC10	1.65	6h	-0.000633232	0.0650075	0.0468149	0.0144093	0.103831	-0.0515223	-0.215629	0.0360515	0.0373125	0.0173492		0.00837478	-0.0377716	0.0133926	-0.0582831			-0.0148878		-0.00346631		0.0711328	0.00948414	0.0170885	0.084849	0.0175969		0.00832223	0.0159324		0.00730981	0.0419621	0.0083351	0.0475646		-0.0441053	-0.0275717	-0.00693117	-0.0345172	0.0111038
TG-GATES	Rat	Liver	vitro	bolus	TG-Rvitro PRH - ethinylestradiol.High.8hr	Ethinylestradiol	H		8h	-0.111778	0.065008		0.0396509	0.0628448	0.099443	0.194982	-0.133636	-0.0583705	0.124753	0.0613788	-0.0577592	0.342969	-0.0558598	0.0453648	-0.063436			-0.205884	-0.113753	-0.136855	-0.0811305	0.00425651	0.173836	-0.190223				-0.0267695		0.0465822		0.349035				-0.075823	0.14161	0.0070179	-0.014014
TG-GATES	Rat	Liver	vitro	bolus	TG-Rvitro PRH - cyclosporine A.Low.24hr	Cyclosporine A	L		24h	0.102267	0.0651032		-0.0152739	0.125497	-0.0969032	-0.048653	0.00717117	0.079124	0.1779	0.0372003	0.244905	0.222536	0.19958	-0.0782117	0.127672			0.0426773	-0.138387	0.0996925	0.290784	0.206136	0.0291081	0.114917				-0.0980028		0.119025		-0.113066				0.0204618	0.0576517	-0.0900938	0.0269986
TG-GATES	Rat	Liver	vivo	repeat	TG-RVivoLiverRepeat - sulfasalazine.Middle.29day	Sulfasalazine	M		29d	0.100077	0.0652491		0.191761	0.0981828	0.0396929	0.028366	0.343673	0.0511147	-0.281065	0.113847		0.360461	0.945441						-0.151552		0.300384	0.0523422	0.267357	-0.00454776				0.854657		0.348849		1.2234					0.183148	0.1659	-0.053432
TG-GATES	Rat	Kidney	vivo	repeat	TG-RVivoKidneyRepeat - phenacetin.Middle.8day	Phenacetin	M		8d	-0.0134736	0.065261	0.175163	0.0486821	0.0764049	0.113017	-0.10706	-0.00338865	-0.032234	-0.159199	0.0215243	-0.0527036	0.077242	-0.410769		0.131657			-0.0262237	0.0156756	0.0721026	0.14282	0.103518	-0.0832695	0.0399413				0.116021		-0.0223684		0.0220022				0.039378	0.0825002	0.00386872	-0.0837617
TG-GATES	Rat	Liver	vitro	bolus	TG-Rvitro PRH - methimazole.High.8hr	Methimazole	H		8h	-0.139624	0.0652968		-0.50895	0.135328	0.189996	0.0464971	-0.0977098	-0.102263	0.0271577	-0.0581009	0.235046	0.342641	-0.102889	0.144368	0.254209			0.215792	-0.236725	0.447679	-0.145959	-0.195667	0.0662607	-0.0934339				-0.23495		0.0985336		-0.393875				0.3834	0.0564734	0.229471	0.0495703
TG-GATES	Rat	Liver	vivo	bolus	TG-RVivoLiverSingle - cisplatin.High.9hr	Cisplatin	H		9h	0.0808954	0.0653735		0.306029	0.442361	-0.288447	-0.168512	-0.629677	0.0266108	-0.346218	-0.011945		0.0376246	-0.552542						-0.352249		0.274746	0.0479352	0.158182	-0.058504				-0.0813312		-0.74162		0.600988					-0.094101	-0.0940798	0.0480007
TG-GATES	Human	Liver	vitro	bolus	TG-HVitro PHH - N-nitrosomorpholine.Low.24hr	N-nitrosomorpholine	L		24h	0.0672085	0.0654855	0.0866696	0.00623802	-0.0646408	-0.133894	-0.0781475	0.0456241	0.00985242	-0.00126154	0.0766173	-0.0718196		0.0051966	0.1299	-0.0124472	0.0552191	0.00178449	0.0673933	-0.0771565	0.0909096	0.0826623	-0.0792707	-0.0249921		0.107755	-0.269834	0.0308558	0.001336	0.0493589	0.0503485	0.028438	-0.0174744	0.169525	0.023319	0.0655805	0.00749372	0.0430827		0.0126158
TG-GATES	Rat	Liver	vitro	bolus	TG-Rvitro PRH - fluphenazine.Low.24hr	Fluphenazine	L		24h	0.117356	0.0655952		-0.0494339	0.0522202	-0.133111	-0.0437222	0.0374268	-0.0335248	-0.1166	-0.0161301	-0.00296629	0.160163	-0.0987356	-0.0885318	0.190681			0.0638848	0.037809	0.190337	-0.126805	-0.101615	-0.000952981	0.0199153				-0.271709		-0.135225		-0.32616				-0.0406779	-0.0219728	-0.0590377	0.0702411
TG-GATES	Rat	Kidney	vivo	repeat	TG-RVivoKidneyRepeat - allyl alcohol.Low.8day	Allyl alcohol	L		8d	-0.0519759	0.0656055	-0.314114	-0.204303	-0.00736365	-0.0274474	0.0140473	-0.0173266	0.00632878	-0.0454127	-0.0492687	-0.061496	-0.13257	0.557642		0.0688269			-0.0316403	0.00365821	0.0388815	-0.163845	-0.059832	0.0794104	-0.114779				0.511747		0.00471409		0.0415892				0.0227057	-0.113952	0.0370258	-0.0652054
TG-GATES	Rat	Liver	vivo	bolus	TG-RVivoLiverSingle - azathioprine.Low.24hr	Azathioprine	L		24h	-0.187982	0.0656711		0.0248497	-0.146652	0.0635396	0.0120368	0.151976	-0.0797188	0.367754	-0.0243102		0.106792	-0.434944						0.0359382		0.375801	-0.0349113	0.0694489	-0.0670196				-0.470313		-0.0392492		0.0927222					0.00744386	-0.061538	0.0409734
TG-GATES	Human	Liver	vitro	bolus	TG-HVitro PHH - azathioprine.Low.2hr	Azathioprine	L		2h	0.0772547	0.0656834	-0.00825624	0.00786075	0.028493	-0.143695	-0.0438801	-0.146659	0.0690922	-0.0497894	-0.016337	-0.261212		-0.0874055	0.0895721	0.0647115	-0.083409	-0.0815594	-0.037863	-0.0971745	-0.0635875	-0.119718	-0.217849	0.00234143		-0.0353238	-0.0819413	-0.0567796	0.0615949	-0.0263817	-0.130578	-0.107059	-0.0763376	-0.0576945	0.0490879	0.0291705	-0.122258	0.133741		0.0203779
TG-GATES	Human	Liver	vitro	bolus	TG-HVitro PHH - methylene dianiline.Low.24hr	Methylene dianiline	L		24h	-0.165797	0.065719	-0.00870359	-0.0672099	0.0190156	-0.157396	0.065191	-0.114268	0.0755149	0.0613653	0.0829098	0.121708		-0.107669	0.070792	0.0563694	0.0297338	0.0513166	0.0389245	0.0605641	0.284128	0.146678	-0.0895321	-0.215408		-0.0852664	-0.162961	0.0183767	-0.0719358	-0.0593566	-0.0100607	0.0144385	-0.149959	0.0756666	0.0647609	0.105747	0.0339161	-0.172399		-0.012439
TG-GATES	Rat	Liver	vivo	repeat	TG-RVivoLiverRepeat - glibenclamide.High.4day	Glibenclamide	H		4d	0.0809419	0.0657605		-0.0348669	0.000909294	-0.066606	-0.135721	-0.0804209	0.0995234	0.221114	0.0954282		0.0479142	0.718434						-0.199495		0.198447	-0.0173025	-0.082389	0.0797269				-0.662844		0.229886		-0.0402819					0.156779	0.119678	-0.0287423
TG-GATES	Human	Liver	vitro	bolus	TG-HVitro PHH - moxisylyte.Middle.24hr	Moxisylyte	M		24h	-0.00331751	0.0658268	0.0520476	0.060804	0.0659143	-0.0563724	0.104259	0.107831	0.0273655	-0.0764	0.0902606	0.148394		0.279083	0.017498	-0.0428155	-0.0584296	0.10675	-0.0819792	0.0200838	0.29295	0.106976	-0.0479347	-0.00588508		-0.016097	-0.259661	0.0703162	0.0518724	0.0284982	-0.0239372	0.0735315	0.0906748	0.0581161	-0.00813687	-0.00354771	-0.00414077	0.0309792		0.0486306
TG-GATES	Rat	Liver	vitro	bolus	TG-Rvitro PRH - ketoconazole.Low.2hr	Ketoconazole	L		2h	-0.00678893	0.0658758		-0.0539101	0.160034	-0.10148	-0.0719744	-0.0109703	-0.0163927	0.0196873	-0.0703766	-0.000318567	-0.00479357	0.240975	-0.0432878	0.0740853			-0.0672503	-0.13022	0.00437975	0.0389369	-0.092212	-0.0512414	-0.0470274				0.1037		0.261972		0.109809				-0.0443898	0.0198778	0.159615	0.0142703
PREDICT-IV	Rat	Liver	vitro	repeat	PIV Rvitro Repeat PRH - EMD33_LD14_LFC	EMD333	L		14d	-0.200372	0.0659476	-0.102533	0.0296197	0.190932	0.0756687	-0.0673399	0.216751	0.0314849	-0.261061		0.0800061	0.101819	0.458296	0.00505935	-0.0645456	-0.076978	0.0100666	-0.00321888	-0.207127	0.0226355	-0.175368	0.0560741	0.0640036	-0.00596781	-0.0611077	0.00799825	0.365963	-0.161049		0.0670986	-0.1021	-0.0962452	-0.0668019		-0.00178561	-0.108581	0.085866	0.0738323	-0.0206603
TG-GATES	Rat	Liver	vivo	repeat	TG-RVivoLiverRepeat - carboplatin.High.8day	Carboplatin	H		8d	0.147944	0.0659517		-0.243603	-0.0645344	-0.277686	0.0442185	0.69182	0.335113	-0.0758882	-0.198804		0.167564	-0.379302						0.0183477		1.23769	0.0658314	-0.274274	-0.0890255				-0.642521		-0.496584		1.44816					0.113686	-0.377082	0.0296917
TG-GATES	Rat	Kidney	vivo	repeat	TG-RVivoKidneyRepeat - carboplatin.Low.29day	Carboplatin	L		29d	0.0327739	0.0660862	0.333246	0.194571	0.0695534	-0.0138225	-0.0358759	-0.00562398	0.0511443	0.241642	-0.0963249	0.00929602	-0.0880957	-0.256706		-0.127287			0.0769581	-0.103086	-0.105459	0.0989677	0.0653232	0.0565084	-0.120906				0.0164871		0.000808941		0.215358				0.0601219	0.154526	-0.117418	0.286813
TG-GATES	Rat	Liver	vitro	bolus	TG-Rvitro PRH - colchicine.High.8hr	Colchicine	H		8h	0.105721	0.0661642		-1.02133	-0.381038	-1.53058	-0.318161	-0.271282	-0.409584	0.218756	-0.237252	1.09869	0.909884	-0.0849861	-0.0190971	0.184956			-0.291802	-0.12158	-0.0237425	-0.397071	0.113964	-1.22958	-0.763004				0.18268		0.74489		-0.465338				0.390869	-0.14653	1.03625	0.0577502
TG-GATES	Human	Liver	vitro	bolus	TG-HVitro PHH - coumarin.High.8hr	Coumarin	H		8h	0.115828	0.0662116	-0.0878318	0.284928	0.0640643	0.168611	0.0531958	0.163485	0.0284586	0.0952198	0.036654	-0.0593729		-0.0532578	-0.121203	-0.116417	-0.0461661	0.235612	0.0980857	0.148677	0.15802	0.0733099	0.183858	0.107261		-0.00316788	-0.217226	0.656118	0.219045	0.159808	0.0912482	0.0475148	-0.0716937	-0.132278	0.0253074	0.108216	-0.0684226	-0.0677047		0.0174085
TG-GATES	Rat	Liver	vivo	repeat	TG-RVivoLiverRepeat - phenylanthranilic acid.High.15day	Phenylanthranilic acid	H		15d	0.234522	0.0663228		-0.592113	1.54393	0.545718	0.194692	-0.607038	-0.0394219	-0.807088	0.111586		1.64006	-0.511147						0.0948522		-0.334078	0.0816213	0.279688	-0.261436				-2.49896		-1.68258		4.33918					0.0819988	0.0699908	-0.0796266
TG-GATES	Rat	Liver	vitro	bolus	TG-Rvitro PRH - flutamide.High.8hr	Flutamide	H		8h	0.0381771	0.0663574		0.124712	0.0786419	-0.159545	0.100407	-0.0795175	-0.176094	-0.0662715	-0.0324742	0.0195662	0.131289	0.145679	0.239844	-0.167934			0.113973	0.0981734	0.224808	-0.36142	0.028164	-0.0691973	-0.112672				0.151297		0.156504		-0.0307055				0.073351	0.0812932	0.0368421	0.0014369
TG-GATES	Rat	Liver	vivo	repeat	TG-RVivoLiverRepeat - theophylline.Middle.8day	Theophylline	M		8d	0.0189983	0.0663785		0.310232	0.0567907	-0.152141	0.101078	-0.44613	0.120484	-0.106326	0.0142662		0.0123871	-0.0178209						-0.103164		0.694011	-0.0314974	0.0923096	0.0604841				0.0634116		-0.086674		1.24801					-0.0729337	0.317079	-0.00238418
TG-GATES	Rat	Liver	vivo	bolus	TG-RVivoLiverSingle - imipramine.High.3hr	Imipramine	H		3h	-0.0781639	0.0665207		-0.0467855	-0.045641	-0.312229	0.123074	0.232485	0.00114309	0.258337	-0.0659312		-0.106426	-0.159413						-0.00736736		0.162622	0.0488293	-0.50121	0.0718438				-0.212814		-0.259845		-0.088594					-0.0484731	0.010358	-0.00538768
TG-GATES	Rat	Kidney	vivo	repeat	TG-RVivoKidneyRepeat - bromoethylamine.Middle.8day	Bromoethylamine	M		8d	0.034065	0.0665896	0.0772556	0.378038	0.101477	0.211453	0.0687152	-0.010471	0.0708365	-0.131118	-0.0136039	0.113863	0.0861165	0.131486		0.153316			-0.0858239	-0.0974	-0.0179753	0.184787	0.0173132	0.0478293	-0.225442				0.49799		0.00441516		-0.0180735				-0.0420364	0.0488669	0.108849	0.000586096
PREDICT-IV	Rat	Liver	vitro	bolus	PIV Rvitro Repeat PRH - TOGIZN_HD1_LFC	Troglitazone	H		1d	-0.118755	0.06663	-0.000608068	-0.364707	0.217446	-0.0306259	0.0393737	0.190526	0.166064	0.148743		0.0425845	3.72422	0.434672	0.0107897	0.0332536	-0.0489695	0.0616839	-0.0159113	0.0614563	-0.032573	-0.484198	0.0395686	0.335037	-0.246726	0.068162	0.0413512	0.12247	-0.0904284		0.00967483	-0.141136	0.57821	-0.0552367		-0.207486	0.101723	-0.0264127	0.0697584	-0.0150438
TG-GATES	Rat	Liver	vivo	repeat	TG-RVivoLiverRepeat - cimetidine.Low.15day	Cimetidine	L		15d	0.040412	0.0666616		0.0666599	-0.197704	-0.220602	-0.0382574	-0.238728	0.0486547	-0.0900111	-0.0819834		0.055988	0.145221						-0.0154349		-0.12513	-0.0146891	-0.111296	0.122148				-0.0364649		-0.062947		0.933731					0.24063	0.0492796	0.00691935
TG-GATES	Rat	Liver	vitro	bolus	TG-Rvitro PRH - cisplatin.High.8hr	Cisplatin	H		8h	-0.234141	0.0666834		-0.473449	-0.183178	-1.26001	-0.0977713	0.0659472	-0.0281943	0.117682	0.0880976	-0.617929	-0.191211	0.308923	-0.00256064	0.5186			-0.628379	-0.355933	0.156238	-1.58552	0.347667	-0.865186	-0.925547				0.330131		0.634039		0.637796				-0.801579	0.0379239	0.971277	0.0944579
TG-GATES	Rat	Liver	vivo	repeat	TG-RVivoLiverRepeat - benzbromarone.Low.15day	Benzbromarone	L		15d	-0.0670115	0.0667947		-0.180886	-0.0624179	0.0559859	0.260502	0.203407	0.256734	-0.134245	-0.0282957		1.01335	0.30026						0.0520764		0.533254	0.0513824	0.00764556	-0.0805043				-0.306571		0.215824		2.14313					0.0996514	-0.0998876	-0.0454449
TG-GATES	Rat	Kidney	vivo	bolus	TG-RVivoKidneySingle - bromobenzene.Middle.3hr	Bromobenzene	M		3h	0.000514208	0.0669172	-0.182326	0.104875	0.156352	-0.00589858	-0.0386391	0.0387702	-0.0128337	0.182029	0.0181806	0.00637993	0.0302663	0.170642		0.126029			0.0211008	-0.028487	0.0541834	-0.133638	-0.0414515	0.175705	0.0088175				1.28875		0.0166448		-0.0227026				-0.11877	0.0593989	0.0978962	-0.0317014
TG-GATES	Rat	Liver	vivo	repeat	TG-RVivoLiverRepeat - WY-14643.High.4day	WY-14643	H		4d	-0.19423	0.0669805		-0.664374	0.20319	-0.225254	-0.0127342	0.933066	0.584075	0.825212	-0.0673921		2.50506	-1.0752						0.0582978		-0.390921	-0.119723	0.258301	0.0357522				-2.36552		0.442963		3.21582					-0.123575	-1.37534	-0.241304
TG-GATES	Rat	Liver	vivo	bolus	TG-RVivoLiverSingle - butylated hydroxyanisole.Middle.6hr	Butylated hydroxyanisole	M		6h	0.336871	0.0670469		0.920237	2.30234	1.8059	0.118959	-0.126503	0.303238	-0.0101926	-0.196371		-0.167327	-0.662243						0.00933827		-0.0453956	-0.00257965	0.104901	0.0665208				-2.12911		-0.749353		1.3208					0.096104	-0.351687	0.00719919
TG-GATES	Rat	Liver	vivo	repeat	TG-RVivoLiverRepeat - amiodarone.Low.15day	Amiodarone	L		15d	-0.00376905	0.0670631		-0.0370644	-0.199928	0.196735	0.0278258	1.04533	-0.0186429	0.150669	-0.0636897		-0.200491	-0.234995						0.0844384		-0.285303	0.079046	-0.109254	0.12809				-0.409677		0.156987		-0.2579					-8.95249e-06	0.0788089	-0.00682992
TG-GATES	Rat	Liver	vivo	repeat	TG-RVivoLiverRepeat - cimetidine.High.15day	Cimetidine	H		15d	-0.042912	0.0671335		0.284762	0.128693	-0.382327	0.124746	-0.224943	0.0369874	-0.165418	0.0685989		0.0391003	0.363294						0.0407655		-0.137985	0.131728	-0.0915906	0.0794951				0.42018		-0.0132384		1.77998					0.130799	-0.246193	0.000639791
TG-GATES	Rat	Liver	vitro	bolus	TG-Rvitro PRH - triamterene.Middle.8hr	Triamterene	M		8h	0.00537669	0.0671463		0.0554726	0.114835	-0.160497	-0.156689	-0.167009	-0.0723265	-0.145649	-0.0786205	-0.23365	0.00133334	0.48838	-0.0718204	-0.0850074			0.0369423	-0.0814458	0.118452	-0.0445159	-0.0386742	0.10196	-0.137772				0.178869		0.0385313		0.0314024				-0.0837663	-0.0562018	0.185418	0.0333371
TG-GATES	Rat	Liver	vitro	bolus	TG-Rvitro PRH - phenacetin.High.24hr	Phenacetin	H		24h	-0.0720179	0.0671927		0.0562055	-0.0826474	-0.194681	-0.101476	-0.218178	-0.147039	0.0294366	-0.0576786	0.142593	0.0386592	-0.236645	0.179755	-0.180647			-0.0214318	-0.0383679	-0.0432748	0.100691	0.13322	-0.114835	0.0757291				-0.146444		-0.0758914		0.010644				-0.131825	-0.0354951	-0.0439347	-0.0234771
TG-GATES	Human	Liver	vitro	bolus	TG-HVitro PHH - lomustine.Low.24hr	Lomustine	L		24h	-0.0633734	0.0673519	-0.00297708	0.00682062	-0.011242	0.084749	-0.0359451	-0.112144	0.107592	-0.0734001	0.0541072	0.0345616		0.0947563	-0.127294	-0.00402345	-0.118983	0.0550619	-0.18775	-0.0091086	-0.0224967	-0.0125497	-0.0630702	0.0134093		0.0776738	-0.0603291	-0.016702	-0.0406963	0.0208431	0.0299581	-0.041832	-0.0779249	-0.148683	0.0494125	0.0213653	-0.120875	-0.0421301		0.0123718
TG-GATES	Rat	Liver	vitro	bolus	TG-Rvitro PRH - mexiletine.Low.2hr	Mexiletine	L		2h	-0.0241776	0.0673526		0.0731284	-0.0679141	0.00471751	0.0888385	-0.126795	-0.0989267	-0.119119	-0.0526309	0.0106918	-0.084752	0.07966	-0.0454302	-0.119481			0.0639859	-0.0253059	-0.0351349	0.0181141	0.106605	-0.232169	0.0264273				-0.0105845		0.0377921		0.136943				-0.134529	-0.0517742	0.00983275	0.0217151
TG-GATES	Human	Liver	vitro	bolus	TG-HVitro PHH - carbon tetrachloride.Low.24hr	Carbon tetrachloride	L		24h	-0.00109622	0.0673725	0.122969	0.0486481	-0.0650395	-0.249247	-0.100317	-0.351786	-0.0906107	-0.13741	-0.249094	-0.413093		-0.160761	-0.0605819	0.0429041	-0.00978518	-0.198796	-0.104331	-0.022248	-0.226065	-0.329488	0.363206	-0.0567505		-0.332766	-0.245527	0.0205556	-0.0418266	-0.065792	-0.146858	-0.184708	-0.0762729	-0.034063	0.0139151	-0.104426	-0.279512	-0.03644		-0.1468
TG-GATES	Rat	Liver	vivo	repeat	TG-RVivoLiverRepeat - triazolam.Low.29day	Triazolam	L		29d	0.0165263	0.0676085		0.0101164	0.0583462	-0.198891	0.0759751	0.183383	0.0122395	-0.644369	0.0722396		0.0667532	0.0956148						-0.0847102		0.28171	-0.0207549	-0.0108734	-0.142044				0.241242		-0.0523455		0.220668					-0.0773677	0.235632	-0.0155736
TG-GATES	Rat	Liver	vivo	repeat	TG-RVivoLiverRepeat - nitrofurazone.Low.8day	Nitrofurazone	L		8d	-0.0113371	0.0676707		-0.0194006	0.0630813	0.074783	-0.104566	0.148601	0.0752765	0.0449125	-0.0983987		-0.0852441	0.23844						-0.0413515		0.185556	-0.0503762	-0.0445415	0.0233725				-0.185025		0.127033		0.43221					0.0314022	-0.342498	0.0192104
TG-GATES	Rat	Liver	vivo	bolus	TG-RVivoLiverSingle - ethanol.Middle.24hr	Ethanol	M		24h	0.0718217	0.0678322		-0.0407498	0.175147	0.308627	0.0724325	0.231155	0.0176998	0.236731	0.00254364		0.12885	0.0704436						-0.0502406		-0.12523	0.0396467	0.181506	0.128982				-0.0899095		0.0157906		0.0615674					-0.0630825	-0.101424	-0.0271148
TG-GATES	Rat	Kidney	vivo	bolus	TG-RVivoKidneySingle - bromoethylamine.High.24hr	Bromoethylamine	H		24h	-0.133376	0.0678544	0.315806	2.02409	0.699032	0.583029	-0.0964159	-0.0639994	0.140365	0.067202	-0.17229	0.127635	0.338151	-0.0322621		-0.103145			-0.189795	-0.175898	0.103184	0.182934	0.0404939	0.0936503	0.0913305				0.338969		0.142493		0.266913				-0.130193	0.180358	0.00326463	0.0713724
TG-GATES	Rat	Kidney	vivo	repeat	TG-RVivoKidneyRepeat - cisplatin.High.4day	Cisplatin	H		4d	-0.037393	0.0678863	-0.0926224	1.20606	0.0595256	0.112725	0.0910818	-0.154355	0.158517	-0.0780506	0.0114695	0.13797	0.0141843	-0.0913009		0.000988585			-0.00363525	-0.192215	-0.102832	-0.0141422	0.0807115	0.0772691	-0.228997				1.23762		0.137399		0.190749				-0.0897486	-0.135188	-0.103299	-0.0103103
TG-GATES	Rat	Liver	vivo	repeat	TG-RVivoLiverRepeat - promethazine.Middle.15day	Promethazine	M		15d	0.0856858	0.0679045		0.69304	0.862494	0.18398	-0.0530475	0.384887	0.224597	0.19273	0.0831463		-0.210653	-0.405581						-0.118409		0.803541	0.0417989	0.0856706	-0.00343484				0.622414		0.218987		3.04217					0.128177	-0.375437	-0.0301598
TG-GATES	Rat	Liver	vivo	repeat	TG-RVivoLiverRepeat - terbinafine.Low.4day	Terbinafine	L		4d	-0.0646326	0.0681984		-0.0209982	0.248448	-0.361944	0.0110653	0.282926	0.0293902	-0.107467	0.0228643		0.272469	-0.293115						-0.200406		-0.36216	-0.041499	-0.149427	0.0366924				-0.0286366		0.138196		0.901459					0.132904	-0.239408	-0.0321825
TG-GATES	Rat	Liver	vitro	bolus	TG-Rvitro PRH - nimesulide.Low.2hr	Nimesulide	L		2h	0.0265155	0.0682921		-0.0181433	0.1093	0.0298008	0.0323862	-0.0132707	-0.0935431	0.025305	0.0248948	0.0460323	-0.0749171	-0.057902	0.0647494	-0.0400764			0.015231	-0.0490779	0.0273555	-0.108223	-0.0207178	-0.0884145	0.0363017				-0.136936		-0.24996		0.004808				0.0904071	-0.0105164	-0.0151537	0.00854624
TG-GATES	Rat	Kidney	vivo	repeat	TG-RVivoKidneyRepeat - nitrofurantoin.High.15day	Nitrofurantoin	H		15d	-0.0789656	0.0683067	-0.0364845	1.22806	0.179482	-0.132035	-0.130533	0.0412921	0.105133	0.356758	-0.230273	-0.0563226	-0.123981	0.964765		-0.0690898			-0.100804	-0.0361116	0.0881484	0.366289	0.155818	0.00691154	-0.286739				-0.344542		0.0817198		0.057926				-0.0168498	-0.00476287	0.241947	-0.24363
TG-GATES	Rat	Liver	vitro	bolus	TG-Rvitro PRH - methapyrilene.High.2hr	Methapyrilene	H		2h	-0.0300277	0.0683686		-0.111222	0.258878	-0.169793	0.045989	-0.158816	-0.0737503	0.0460457	0.0846258	0.0283237	-0.115347	0.0843275	0.0684373	0.0560268			-0.00117272	-0.0926801	0.0447698	0.00558825	0.0588422	-0.0851072	-0.1629				0.114722		0.142926		0.168851				-0.0309999	-0.0130285	0.0972578	0.0106034
TG-GATES	Human	Liver	vitro	bolus	TG-HVitro PHH - isoniazid.High.2hr	Isoniazid	H		2h	0.0405109	0.0684456	0.139501	-0.0606444	0.00877976	0.0579494	0.136595	0.0976394	0.247902	0.120683	0.0743411	0.0113964		0.0362942	0.0900729	0.0993801	0.228453	-0.225357	0.224882	-0.194018	-0.0852028	-0.115242	-0.0408789	0.0373012		0.035681	-0.0377736	-0.0143466	0.147515	0.0166517	0.0401117	0.00629523	0.0139947	0.110884	0.0492241	0.0647742	0.000681144	-0.0434529		0.0675815
TG-GATES	Human	Liver	vitro	bolus	TG-HVitro PHH - dantrolene.High.8hr	Dantrolene	H		8h	-0.071522	0.06845	-0.185159	0.161269	-0.319217	-0.310633	-0.0358642	0.369308	-0.454241	-0.282089	0.138078	0.116725		-0.133303	-0.0564005	0.074211	-0.235431	0.333912	-0.248355	-0.190478	-0.572787	-0.141139	0.0261403	0.131847		0.0894394	-0.163355	0.647003	0.207223	0.546839	0.179659	-0.184345	0.32028	0.0900448	0.0798505	-0.526948	0.141169	-0.135495		0.187397
TG-GATES	Rat	Liver	vivo	bolus	TG-RVivoLiverSingle - enalapril.Middle.24hr	Enalapril	M		24h	-0.29641	0.0685194		-0.31817	0.340922	-0.331508	-0.197469	-0.393014	0.0288177	-0.0359997	0.0991383		-0.0241399	-0.0100862						-0.179445		0.393047	-0.00113084	-0.0727971	0.033996				0.734819		0.163115		0.415362					0.0891501	-0.240739	-0.000968529
TG-GATES	Human	Liver	vitro	bolus	TG-HVitro PHH - sulfasalazine.High.2hr	Sulfasalazine	H		2h	-0.165877	0.0685746	-0.0553748	-0.111406	-0.107621	0.0866922	0.158295	-0.16335	-0.0245179	0.10896	0.0235016	0.122666		-0.0236119	0.0390266	-0.0501401	-0.074914	0.0593521	-0.17717	0.0504498	-0.0475994	0.04965	-0.25728	-0.17055		0.0986592	0.0944464	-0.023523	0.0284764	-0.0143594	0.165976	0.0199485	-0.0404595	0.246977	0.0452561	-0.0486677	0.0792547	-0.164574		0.00434726
TG-GATES	Rat	Liver	vivo	repeat	TG-RVivoLiverRepeat - chloramphenicol.Middle.15day	Chloramphenicol	M		15d	0.198809	0.0686374		0.000411577	0.785116	0.286851	-0.0548814	0.0777899	-0.0602077	-0.405622	0.0623164		1.04205	0.737802						-0.0342118		-0.221293	-0.057095	0.29932	-0.0138161				-0.751568		-0.0978614		3.36564					0.0140485	-0.16105	-0.0158443
TG-GATES	Rat	Liver	vivo	repeat	TG-RVivoLiverRepeat - amitriptyline.Low.4day	Amitriptyline	L		4d	0.167658	0.0686855		0.144873	0.559632	0.131118	-0.185455	0.654767	-0.0357179	0.123018	-0.0914712		0.128297	-0.120818						0.126593		0.0324765	-0.0173367	0.390644	0.0843885				-0.208343		-0.145357		0.661781					-0.0422815	0.118936	0.0203307
TG-GATES	Rat	Liver	vivo	repeat	TG-RVivoLiverRepeat - trimethadione.Middle.15day	Trimethadione	M		15d	-0.112506	0.0687351		0.0378143	0.682805	-0.324493	0.0305689	-0.000634266	0.0903299	0.151884	-0.082493		-0.0936144	0.382961						-0.0269916		0.201159	-0.0631065	0.0620476	-0.0442506				0.358314		0.268388		2.03607					-0.00947698	-0.136878	-0.0196454
TG-GATES	Rat	Liver	vitro	bolus	TG-Rvitro PRH - phenylbutazone.Low.8hr	Phenylbutazone	L		8h	0.0353051	0.0687745		0.0567461	-0.0276185	-0.0499876	-0.039911	0.0636712	0.00202426	-0.188039	-0.0012966	0.136192	0.0445924	-0.0494396	-0.0436667	0.0541005			-0.0702931	-0.10942	0.143992	-0.0709786	-0.00476164	0.0343377	-0.0711273				-0.0757313		0.0944847		-0.0187305				0.0377846	-0.043682	0.0221557	-0.00108468
TG-GATES	Rat	Liver	vivo	bolus	TG-RVivoLiverSingle - fenofibrate.Low.24hr	Fenofibrate	L		24h	0.0372583	0.0688372		-0.393622	-0.114658	-0.196192	-0.101149	0.372534	0.0986876	-0.386701	-0.158651		1.7923	0.0387019						-0.0554851		-0.348088	-0.13761	0.395355	-0.086073				0.0665933		0.105726		1.30023					0.208196	-0.265852	-0.0150847
TG-GATES	Rat	Liver	vivo	repeat	TG-RVivoLiverRepeat - azathioprine.Middle.29day	Azathioprine	M		29d	-0.252646	0.0689668		-0.155446	0.0598496	-0.322677	0.170598	0.826339	-0.169921	-0.0090063	-0.214939		0.0105485	-1.04874						0.0341895		0.088853	0.122848	-0.104882	0.0880292				-0.541836		0.201117		2.47502					-0.0432111	-0.39742	-0.000278867
TG-GATES	Rat	Liver	vitro	bolus	TG-Rvitro PRH - chlormezanone.Middle.8hr	Chlormezanone	M		8h	0.0538911	0.0689683		0.13671	0.150182	-0.00647287	-0.0753172	0.0285035	-0.0392882	-0.190765	0.1819	-0.0665712	0.118324	0.233651	-0.18329	0.0397435			0.113529	0.064518	0.150678	0.109886	-0.133896	0.00474282	0.119449				-0.0359261		-0.0506116		0.298874				0.047622	0.137273	0.119342	0.0558321
TG-GATES	Rat	Liver	vivo	repeat	TG-RVivoLiverRepeat - aspirin.Middle.4day	Aspirin	M		4d	-0.0279241	0.0689882		0.0323506	0.0071183	-0.263762	0.0125544	0.0352931	0.123468	0.0780308	-0.00956138		0.394505	-0.515536						-0.106265		0.168751	-0.0412698	0.0178368	-0.0493423				0.294486		0.0188849		1.04782					0.0517778	0.351576	-0.0213652
TG-GATES	Rat	Liver	vivo	bolus	TG-RVivoLiverSingle - benzbromarone.Low.24hr	Benzbromarone	L		24h	0.0632693	0.0690458		0.0327628	-0.130188	0.0327999	-0.00873577	-0.122052	0.0508819	-0.1298	0.0423283		0.402349	-0.122985						-0.00397486		-0.314348	-0.0538748	0.153872	-0.00430779				0.812034		-0.18711		0.31321					0.162545	0.142882	-0.0469021
TG-GATES	Rat	Liver	vitro	bolus	TG-Rvitro PRH - buthionine sulfoximine.Middle.2hr	Buthionine sulfoximine	M		2h	-0.0370824	0.069103		-0.253041	0.291644	-0.214798	-0.0217286	-0.0947913	-0.115121	-0.157338	-0.194646	-0.182018	-0.0669645	-0.0811971	0.0754684	0.207034			0.0820681	-0.0990951	-0.0432087	-0.095694	0.120663	-0.244072	-0.081865				0.208157		-0.071624		-0.324227				0.000318914	0.0379629	-0.141516	-0.0150983
TG-GATES	Rat	Liver	vitro	bolus	TG-Rvitro PRH - diazepam.Middle.2hr	Diazepam	M		2h	-0.05248	0.0691243		-0.0394142	0.129136	-0.228548	-0.034047	0.0112219	0.0273166	0.158674	0.0910137	0.0180033	-0.0617134	0.141602	-0.0349687	0.0933837			-0.115802	-0.0220891	-0.139399	-0.0229663	0.0445352	-0.0344618	-0.0925698				0.0249343		0.276109		0.138234				0.0161255	-0.0885096	0.160718	0.00201773
TG-GATES	Rat	Liver	vivo	bolus	TG-RVivoLiverSingle - thioridazine.Middle.24hr	Thioridazine	M		24h	-0.0157354	0.0691614		0.00947496	-0.0222561	0.0404182	-0.237147	0.11723	0.0296777	0.482221	-0.181437		0.0172782	0.0742452						-0.00664658		-0.351623	-0.0190304	0.0297417	0.0472808				0.32917		0.260896		0.378464					0.0381436	-0.297021	-0.0647417
TG-GATES	Human	Liver	vitro	bolus	TG-HVitro PHH - aspirin.High.24hr	Aspirin	H		24h	-0.130621	0.0692034	0.342647	0.0170913	0.148321	-0.0788276	-0.244931	0.0670227	0.0843485	0.196186	-0.073377	0.179581		-0.0640673	-0.166706	-0.147018	0.00938561	-0.120824	0.0668365	0.557781	-0.013836	-0.127723	0.00656735	-0.0373613		-0.0555115	0.153987	0.0238923	0.0743141	0.0191439	0.00193976	-0.169981	-0.0278507	-0.118323	-0.123715	0.116939	0.175046	-0.141045		-0.0148803
TG-GATES	Rat	Liver	vivo	bolus	TG-RVivoLiverSingle - diclofenac.Low.9hr	Diclofenac	L		9h	0.0246027	0.0692988		0.109781	0.392224	-0.239823	-0.102856	-0.028177	-0.0614294	-0.224664	-0.112907		0.155532	-0.466535						-0.144911		-0.129952	-0.0889479	0.252292	0.041187				0.383501		-0.274254		0.683364					-0.0206835	-0.280418	-0.0363876
TG-GATES	Rat	Liver	vivo	repeat	TG-RVivoLiverRepeat - danazol.Middle.29day	Danazol	M		29d	-0.0833378	0.0693278		0.216503	0.0781718	0.0134614	-0.0545428	0.215296	0.170301	0.178733	-0.070954		0.149313	-0.128187						-0.0704629		-0.00825733	-0.0858213	0.450227	-0.0398744				0.104102		-0.0743997		1.05554					0.0410835	0.141369	-0.00491918
TG-GATES	Rat	Liver	vivo	repeat	TG-RVivoLiverRepeat - glibenclamide.Middle.15day	Glibenclamide	M		15d	-0.153161	0.0693366		0.250659	0.200393	-0.182425	-0.0324653	0.109503	-0.00188213	-0.0544959	-0.073639		-0.0988966	0.156377						-0.0113638		0.180906	0.114311	0.255167	-0.0554965				0.025237		-0.0859899		0.631061					-0.0682297	0.147603	0.00990852
TG-GATES	Rat	Liver	vitro	bolus	TG-Rvitro PRH - diazepam.Low.2hr	Diazepam	L		2h	-0.0200371	0.0694223		-0.00378287	-0.0667453	-0.176272	-0.00847572	-0.000195878	-0.0249687	-0.129877	0.0139794	-0.00559151	-0.061688	0.0353894	-0.0759566	-0.038552			-0.072832	-0.0495653	-0.0926182	-0.0883882	-0.0284053	-0.00900416	-0.0690076				0.0195097		0.175973		0.0198898				0.0493316	-0.0186574	0.105987	0.00441281
TG-GATES	Rat	Liver	vivo	repeat	TG-RVivoLiverRepeat - lomustine.Low.8day	Lomustine	L		8d	-0.178545	0.0694444		0.0340602	0.213791	0.0689826	-0.126148	-0.313626	0.117851	0.0319463	0.140995		0.019223	-0.0212747						-0.118175		0.170695	-0.10233	0.052582	-0.197777				0.652952		0.0323001		0.960172					0.0676025	0.0932145	0.0114742
TG-GATES	Rat	Liver	vivo	repeat	TG-RVivoLiverRepeat - promethazine.Middle.8day	Promethazine	M		8d	-0.0909562	0.0695228		0.226628	0.852154	-0.0976921	0.134719	-0.370993	0.130302	0.208056	0.155372		-0.00109924	0.337901						-0.000280648		0.506049	-0.0381893	0.358001	0.0703088				-0.724598		0.427741		1.65792					-0.0710883	0.266319	-0.00248922
TG-GATES	Rat	Liver	vivo	bolus	TG-RVivoLiverSingle - iproniazid.High.24hr	Iproniazid	H		24h	-0.0479979	0.0695325		-0.237137	0.174139	-0.0192774	0.0259347	-0.0861209	0.00306228	-0.37424	0.256555		-0.103956	0.275429						0.0300955		0.798885	-0.0871256	0.315322	-0.1624				0.33529		-0.256776		0.500357					0.0590899	-0.180713	0.0188767
TG-GATES	Rat	Liver	vivo	repeat	TG-RVivoLiverRepeat - sulfasalazine.Middle.4day	Sulfasalazine	M		4d	0.162694	0.069606		-0.00738115	0.53456	-0.248072	-0.136688	-0.45318	-0.000637501	-0.396785	-0.0496647		0.129053	0.550897						-0.113545		-0.0413719	-0.106787	0.089862	0.087635				0.198559		0.0854745		1.05666					0.0160063	-0.277113	-0.0315038
TG-GATES	Rat	Liver	vivo	repeat	TG-RVivoLiverRepeat - chlorpropamide.Middle.8day	Chlorpropamide	M		8d	0.0906604	0.0696887		-0.278577	0.0361919	-0.016485	0.123473	-0.00325041	0.0684849	0.253243	-0.144366		0.221676	0.258675						-0.104224		0.376071	-0.0231336	0.064244	0.148167				-0.676317		-0.359914		0.367447					0.0248524	0.0494796	-0.0150008
TG-GATES	Rat	Liver	vivo	repeat	TG-RVivoLiverRepeat - carboplatin.Middle.29day	Carboplatin	M		29d	-0.136798	0.0697401		0.157548	0.0301321	-0.100569	-0.0312087	0.324766	-0.0695197	0.248576	0.0684209		0.105044	-0.112406						0.0422359		0.627215	-0.0861603	0.249556	0.0497015				0.0112315		0.0333508		1.33616					-0.174608	0.296954	0.0206289
TG-GATES	Rat	Liver	vivo	repeat	TG-RVivoLiverRepeat - fluphenazine.Middle.15day	Fluphenazine	M		15d	-0.070513	0.0697858		-0.0436973	0.171568	-0.135859	-0.0553954	-0.262405	0.0312904	-0.0731559	-0.0231199		-0.231924	-0.0802548						0.0727917		0.100472	-0.0180365	0.339043	-0.175098				0.131388		0.0221603		1.42656					0.0613313	-0.0319565	-0.0128937
TG-GATES	Human	Liver	vitro	bolus	TG-HVitro PHH - N-methyl-N-nitrosourea.Low.24hr	N-methyl-N-nitrosourea	L		24h	-0.00107326	0.0699322	-0.00901752	-0.0670741	-0.366139	-0.00655954	0.00643864	-0.359748	0.110004	-0.18411	-0.0292265	0.131637		-0.477186	0.0235503	-0.174412	-0.206304	0.196951	-0.0279204	0.0629266	0.0858484	-0.000900285	-0.00304655	0.0363495		0.169414	0.0031127	0.0964058	0.0122674	-0.0229913	-0.0401064	0.138049	-0.236454	-0.0547271	-0.0660288	0.113866	0.0904866	-0.0677623		-0.00309135
TG-GATES	Human	Liver	vitro	bolus	TG-HVitro PHH - amphotericin B.High.24hr	Amphotericin B	H		24h	-0.102543	0.0699789	-0.0125168	0.0560081	-0.0831118	-0.110444	0.0255655	0.073105	0.164558	0.171089	-0.255813	0.089157		-0.526438	0.0354881	0.099021	-0.00375768	0.034548	0.116487	0.353963	0.361371	-0.663278	0.159642	0.330996		-0.0742298	0.0354231	-0.440768	0.151054	0.103243	-0.0381371	0.00292718	-0.556801	-0.0501681	0.0137746	0.0876889	0.362556	0.0067289		0.152865
TG-GATES	Rat	Kidney	vivo	bolus	TG-RVivoKidneySingle - phenacetin.Middle.24hr	Phenacetin	M		24h	-0.0939112	0.0700141	-0.046883	0.810968	0.338809	0.839036	0.210335	0.0557021	0.184082	0.247608	0.0125255	0.0214006	0.0284837	-0.240549		-0.0244568			-0.0157977	0.0905521	0.219088	-0.126889	-0.188791	0.136711	0.0768952				0.151038		0.175225		0.291983				-0.136135	-0.0404407	-0.0650577	0.0033793
TG-GATES	Rat	Liver	vivo	repeat	TG-RVivoLiverRepeat - methapyrilene.Low.15day	Methapyrilene	L		15d	-0.138489	0.0700147		0.259733	0.227427	-0.369257	0.161165	-0.286732	0.00866434	-0.271561	-0.0882894		0.0606234	-0.156584						0.0250727		0.503221	-0.017565	0.149109	0.0590394				-0.322799		0.165957		1.20371					0.181973	-0.132635	-0.0214107
TG-GATES	Rat	Liver	vitro	bolus	TG-Rvitro PRH - monocrotaline.Low.24hr	Monocrotaline	L		24h	0.0167901	0.0700557		0.304119	0.18002	0.465523	-0.257936	0.00567538	0.0674452	0.257604	0.0181299	0.0410673	0.047231	-0.0662278	-0.0521089	-0.186736			-0.0236032	0.0532322	0.0430793	0.377348	-0.175289	0.00089369	-0.00397288				-0.24166		0.0951972		0.41556				-0.0601066	0.158939	0.0426017	-0.0158402
PREDICT-IV	Human	Liver	vitro	bolus	PIV Hvitro Repeat PHH - IBUPFN_HD1_LFC	Ibuprofen	H		1d	-0.056568	0.0700691	-0.203539	0.791082	-0.328612	0.356158	0.405855	0.169307	0.788519	0.295725	-0.369011	0.321538	-0.300927	-0.486233	0.0459992	-0.631328	0.743077	0.588664	0.0056379	0.0504914	1.30836	-0.050783	0.0850596	1.05244	-0.1687	-0.507112	0.770122	0.676772	0.0856656	1.32085	0.198027	-0.0961479	-0.998668	-0.100565	-0.0464199	-0.106218	0.129564	0.300203	-0.85658	0.0395849
TG-GATES	Rat	Liver	vitro	bolus	TG-Rvitro PRH - haloperidol.Middle.8hr	Haloperidol	M		8h	0.0353415	0.0701998		0.104993	-0.0344389	0.102432	-0.0797114	0.0845428	0.0258408	-0.875633	0.0841785	-0.0289403	0.0671864	-0.103688	-0.0534964	0.133908			0.262667	0.0882728	0.22425	-0.411104	0.0339512	0.336415	-0.0593612				-0.285441		-0.168262		-0.036935				0.110397	-0.107717	0.0567994	0.0603776
TG-GATES	Rat	Liver	vivo	bolus	TG-RVivoLiverSingle - sulfasalazine.High.6hr	Sulfasalazine	H		6h	-0.0698245	0.0702624		0.141081	-0.0179178	0.0390505	0.181036	-0.347949	-0.00655544	0.0999109	-0.0673984		-0.105651	0.593355						0.0370237		0.978572	-0.0663637	-0.0596403	0.115835				-0.977534		-0.0491995		-0.484497					-0.0680706	0.109928	-0.0440703
TG-GATES	Human	Liver	vitro	bolus	TG-HVitro PHH - phenobarbital.Middle.2hr	Phenobarbital	M		2h	0.0799418	0.0702702	0.0103373	-0.00201749	-0.0330639	0.0578763	0.231159	0.0444873	0.0738089	0.0765462	-0.0754134	-0.0357593		-0.0560764	0.119154	-0.023392	-0.123478	0.106499	-0.00533137	-0.0639727	-0.0825422	0.117816	-0.0686037	-0.0353192		0.0933652	0.0193429	0.246264	-0.00140941	-0.0120575	0.0415057	-0.0577141	0.0231407	-0.00315243	0.0571735	-0.0149892	-0.12341	-0.00394804		-0.0187209
TG-GATES	Rat	Liver	vivo	repeat	TG-RVivoLiverRepeat - dantrolene.Low.29day	Dantrolene	L		29d	0.160082	0.0703053		0.235122	0.29343	0.134775	-0.142748	-0.201369	0.198496	-0.599412	0.0753778		0.201158	-0.51525						0.0456193		-0.0199019	-0.0635555	0.41521	-0.114405				-0.0184389		-0.0906823		2.14481					0.0818984	-0.379333	-0.0552248
TG-GATES	Rat	Liver	vivo	bolus	TG-RVivoLiverSingle - metformin.High.9hr	Metformin	H		9h	-0.195881	0.0703058		-0.118832	-0.165264	0.278199	0.0444249	-0.487619	0.00290645	-0.214708	0.126727		0.31605	-0.259114						0.0527298		0.100296	0.0826659	0.101067	0.150495				-0.285403		-0.742507		-0.587488					-0.0151727	0.106405	-0.0337317
TG-GATES	Rat	Liver	vitro	bolus	TG-Rvitro PRH - thioacetamide.Low.2hr	Thioacetamide	L		2h	0.149178	0.0703191		0.0243144	0.0125346	-0.102988	0.130757	0.0910682	0.115868	-0.128825	-0.0388458	0.111153	0.0281688	-0.0134888	-0.258608	0.557564			0.134865	0.0360268	0.00607241	-0.188494	0.0849794	-0.071527	0.027969				-0.138721		-0.142443		0.0315877				0.227736	0.156699	-0.0968597	0.0896662
TG-GATES	Rat	Kidney	vivo	repeat	TG-RVivoKidneyRepeat - acetazolamide.Middle.29day	Acetazolamide	M		29d	-0.0374573	0.0704281	-0.15536	0.023038	-0.0271096	-0.0365994	-0.0259531	-0.108441	0.115565	-0.205026	-0.0324865	-0.181039	-0.118032	0.238089		-0.217455			0.00224073	-0.0749158	0.023569	0.0411548	-0.123608	-0.0344385	-0.0896644				1.23598		-0.139532		0.0665982				-0.040588	0.0234112	0.00100941	-0.0503807
TG-GATES	Rat	Liver	vivo	repeat	TG-RVivoLiverRepeat - bucetin.Middle.8day	Bucetin	M		8d	-0.00507338	0.0706217		-0.257207	0.235575	0.191275	-0.152045	0.111472	0.095022	0.194603	0.0939913		0.0676991	-0.427682						0.127427		-0.0810336	0.00504178	-0.0166352	0.0786392				-0.596306		-0.0220887		0.737601					0.0500645	0.00310583	0.0255722
TG-GATES	Rat	Liver	vivo	bolus	TG-RVivoLiverSingle - gefitinib.High.9hr	Gefitinib	H		9h	-0.152218	0.07064		-0.44937	-0.208759	0.370382	-0.0121232	-0.339763	0.0413601	0.436616	-0.040958		0.389847	-0.382638						0.0690034		0.696645	0.0148867	-0.228301	0.0350593				-1.67484		-0.450952		0.262119					0.0751239	-0.340678	0.0125073
PREDICT-IV	Human	Liver	vitro	bolus	PIV Hvitro Repeat PHH - CICLOSP_LD1_LFC	Cyclosporine A	L		1d	-0.109557	0.0706665	-0.251601	-0.0714667	-0.0834885	0.0140296	0.181268	0.0611731	-0.0462304	-0.102332	0.0214315	0.321617	-0.578934	-0.376561	-0.195262	-0.0477991	-0.0504089	0.114477	-0.0919687	0.0567054	-0.143512	-0.17796	0.0385583	0.318818	-0.160452	-0.0721801	-0.0663758	-0.22918	0.0140506	0.476726	-0.207249	-0.132778	-0.171075	-0.147631	0.0440541	-0.140191	0.0851156	0.208189	-0.472018	0.0853071
TG-GATES	Rat	Kidney	vivo	repeat	TG-RVivoKidneyRepeat - phenylanthranilic acid.Middle.29day	Phenylanthranilic acid	M		29d	-0.00940754	0.070669	0.459046	0.234653	0.14969	0.2187	0.465021	0.0520181	-0.0136993	-0.194628	-0.250906	0.0976833	0.129089	-0.0271814		-0.471962			0.265387	0.0331405	-0.0370901	0.415405	-0.0211422	-0.039566	-0.0694865				-0.130966		-0.221786		0.116526				0.0523372	-0.00449835	-0.0699102	-0.175681
TG-GATES	Rat	Liver	vivo	bolus	TG-RVivoLiverSingle - galactosamine.Low.6hr	Galactosamine	L		6h	-0.442076	0.0707183		-0.0960846	0.101509	-0.916176	0.100609	0.158471	-0.128341	-1.12817	0.189933		-0.125598	-0.17088						-0.366746		0.408404	0.108758	-0.607175	-0.141017				-0.330156		0.384233		0.213381					0.270179	-0.949913	0.0315407
TG-GATES	Rat	Liver	vivo	repeat	TG-RVivoLiverRepeat - phenytoin.Middle.15day	Phenytoin	M		15d	0.00449784	0.0708608		-0.190574	0.565656	-0.271336	-0.0555307	0.0525993	0.0614991	-0.0418996	-0.112903		0.170521	-0.397464						0.179423		0.215458	0.270521	0.229344	-0.0105796				-0.045672		-0.0333055		1.48924					0.101438	-0.433058	-0.0336277
TG-GATES	Rat	Kidney	vivo	repeat	TG-RVivoKidneyRepeat - cisplatin.Middle.4day	Cisplatin	M		4d	0.0331803	0.0708697	-0.00965346	-0.144769	-0.118581	0.0586901	0.0376623	0.0282028	-0.01382	-0.0912066	0.0159212	0.134272	-0.0148712	0.311294		0.069567			-0.00936391	-0.00922807	0.00817723	0.0375728	-0.0337058	0.106355	0.0368683				0.226748		-0.00159311		0.0482212				-0.0749053	-0.0067478	-0.00393086	-0.050781
TG-GATES	Rat	Liver	vitro	bolus	TG-Rvitro PRH - cyclophosphamide.Middle.8hr	Cyclophosphamide	M		8h	0.0735869	0.0708708		0.0173372	-0.020434	0.0779415	0.173352	-0.116219	-0.0721786	0.143454	-0.0354656	0.0781696	0.134015	-0.015329	-0.00895766	-0.0553631			-0.0419475	-0.203119	-0.0959031	0.0892998	0.0148117	-0.0800883	-0.00136996				0.066505		-0.134276		-0.02375				0.0476169	0.116676	-0.0481185	0.0354814
PREDICT-IV	Rat	Liver	vitro	repeat	PIV Rvitro Repeat PRH - FNOFBT_LD14_LFC	Fenofibrate	L		14d	-0.0809165	0.070891	-0.0685203	-1.18619	-1.2201	0.0361285	-0.142248	1.23856	0.090679	-0.259518		0.0461338	5.792	0.334745	-0.0385657	-0.0750166	0.830067	0.0122096	-0.0478424	0.163086	0.0308851	-2.28744	0.0622146	0.837271	-0.350333	0.0159897	0.0439796	-0.26103	-1.23615		0.5931	-0.0404464	0.0965702	-0.0133276		-0.0079359	0.139421	0.0650129	0.830123	0.0479281
TG-GATES	Human	Liver	vitro	bolus	TG-HVitro PHH - indomethacin.Low.8hr	Indomethacin	L		8h	0.0652269	0.0709133	0.0812599	-0.0051176	-0.00490264	-0.0310667	-0.0536192	0.00738946	0.0269067	0.0404322	-0.0410435	-0.00952		-0.040311	0.144956	0.0298942	0.164494	0.00652651	-0.0486739	-0.0486447	0.151475	0.037074	0.176932	0.0848332		-0.0604454	0.0513098	-0.00984541	-0.0641614	-0.016295	-0.0456749	0.0488494	0.0400016	-0.282919	0.0384618	-0.0530768	0.027133	-0.0119638		-0.00851136
TG-GATES	Rat	Liver	vivo	repeat	TG-RVivoLiverRepeat - sulindac.Middle.8day	Sulindac	M		8d	-0.0184672	0.0709856		0.0907425	-0.0765739	0.0828921	-0.14062	-0.156157	0.103929	-0.315714	-0.0719943		0.136321	-0.0426611						-0.0912533		0.286542	0.17252	0.0125991	0.119154				-0.142556		-0.177707		0.299146					0.0720842	-0.584053	0.00861851
TG-GATES	Rat	Liver	vivo	repeat	TG-RVivoLiverRepeat - bromobenzene.Middle.8day	Bromobenzene	M		8d	0.0398453	0.0710041		-0.0413495	0.30461	0.0255497	-0.0603229	-0.282473	0.0532917	0.261714	-0.131353		0.244364	-0.031308						-0.00306656		-0.164713	-0.0924638	0.0210412	0.0406143				-0.603114		-0.11281		1.64314					-0.0124711	0.18943	-0.0036966
carcinoGENOMICS	Rat	Kidney	vitro	bolus	CX RVitro NRK Chlorothalonil 6h (1.1uM)	Chlorothalonil	IC10	1.1	6h	-0.0226265	0.0710067	0.0365784	-0.00905942	0.014347	-0.0647647	-0.374215	0.0902775	0.0294188	-0.124082		-0.0091391	-0.0619268	-0.00882958	0.0931766			-0.00530436		-0.259622		0.0565065	0.0129591	-0.374134	0.0409973	0.0584402		-0.00731437	-0.00511915		-0.00954882	0.0224893	-0.00832475	0.0411406		0.0274742	-0.126919	-0.324585	-0.116706	0.00256429
TG-GATES	Rat	Liver	vitro	bolus	TG-Rvitro PRH - ethanol.High.2hr	Ethanol	H		2h	0.0311598	0.0710862		-0.125649	-0.123414	-0.128052	0.127347	-0.0860029	0.0406924	-0.190918	-0.0591529	0.0144272	0.0767144	-0.0670547	-0.0307278	0.0984169			0.109713	-0.111513	-0.0374785	-0.370644	0.111314	-0.100991	0.0558006				-0.264163		-0.0284478		-0.313459				0.132715	0.106891	0.00749432	-0.0255596
TG-GATES	Human	Liver	vitro	bolus	TG-HVitro PHH - azathioprine.Low.8hr	Azathioprine	L		8h	0.130868	0.0711906	0.0267699	0.061434	-0.0504622	-0.114699	-0.00913213	-0.0476894	0.110473	-0.128128	-0.0283261	0.0746064		-0.0944502	-0.172697	-0.011144	0.000133328	0.0159076	0.039882	-0.0267277	0.072906	0.64448	-0.119574	-0.0101917		0.0895502	0.0452877	0.273894	0.080237	0.0475413	0.024085	-0.0645286	-0.0643175	-0.0210873	0.0384535	0.00894703	-0.0399715	0.172742		0.05017
TG-GATES	Rat	Kidney	vivo	repeat	TG-RVivoKidneyRepeat - acetaminophen.Middle.4day	Acetaminophen	M		4d	-0.0373786	0.0712166	0.0125167	0.254529	0.138264	0.225745	-0.0887323	-0.109228	-0.0729863	0.188747	-0.0214776	-0.204818	-0.0359146	-0.470765		0.12987			-0.0139414	0.0293536	0.0779777	0.0545607	0.0122625	0.152938	0.0743054				0.529929		-0.123502		0.192386				0.0316146	0.00503217	-0.0648456	0.0984025
TG-GATES	Rat	Liver	vivo	bolus	TG-RVivoLiverSingle - 2,4-dinitrophenol.Middle.9hr	2,4-dinitrophenol	M		9h	0.0213973	0.0714854		0.157192	-0.317672	0.0934602	0.0530396	-0.051448	-0.0112273	-0.0643626	0.00724636		0.288551	-0.285275						-0.044473		-0.219814	-0.139344	-0.180563	-0.184451				-0.757463		-0.283264		-0.145038					0.061218	0.190078	0.0129264
TG-GATES	Rat	Liver	vivo	repeat	TG-RVivoLiverRepeat - 2,4-dinitrophenol.Middle.29day	2,4-dinitrophenol	M		29d	-0.00593019	0.0715096		0.0155113	0.0312598	-0.39611	0.117838	0.382357	0.0321497	0.1692	-0.0872548		0.432429	0.558484						0.00229891		-0.694223	0.00669366	0.0152444	-0.0438243				0.412334		-0.247455		1.01004					0.0400029	-0.273809	0.00451252
TG-GATES	Rat	Liver	vitro	bolus	TG-Rvitro PRH - hexachlorobenzene.Low.2hr	Hexachlorobenzene	L		2h	0.0562177	0.0717164		0.0951341	-0.271085	-0.0416083	-0.107014	-0.0291626	-0.0242213	0.0718535	0.0459971	-0.0374643	0.00263596	0.0449529	-0.0109737	0.0859859			-0.00339567	-0.0794295	0.101195	0.0815368	0.0442175	-0.0179106	0.0679581				0.0209649		-0.169871		0.157202				0.00695376	-0.0423287	0.106662	0.0467822
TG-GATES	Rat	Kidney	vivo	bolus	TG-RVivoKidneySingle - phenacetin.Low.3hr	Phenacetin	L		3h	0.0769345	0.0717978	0.235694	0.0029065	0.0240953	-0.169976	0.00888264	-0.196947	0.0320387	0.220991	-0.0187027	0.0318521	0.0943195	0.784556		0.0809677			0.0685449	0.0996761	0.126467	-0.269545	-0.111595	-0.018846	0.0369387				0.614561		-0.137858		0.0789874				-0.0500057	0.186561	-0.199075	0.109413
TG-GATES	Rat	Liver	vivo	repeat	TG-RVivoLiverRepeat - rosiglitazone maleate.High.29day	Rosiglitazone	H		29d	-0.117289	0.0719246		-0.315614	1.006	-0.217826	0.0413013	-0.140028	0.153844	-0.197746	-0.138402		1.06935	-0.20616						-0.165254		1.07658	-0.0369117	0.0341147	0.0608032				0.0162493		-0.0426143		3.70642					0.113123	0.314937	-0.104556
TG-GATES	Rat	Liver	vivo	bolus	TG-RVivoLiverSingle - acetaminophen.High.3hr	Acetaminophen	H		3h	-0.100093	0.071947		0.0484602	0.319692	-0.21924	-0.0041774	-0.554341	-0.0164943	0.0987697	-0.120141		-0.168711	0.30601						0.106715		0.616963	0.146334	-0.598954	-0.193651				-0.225155		-0.185571		-0.0114403					-0.0669883	-0.393703	0.0248548
TG-GATES	Rat	Liver	vivo	bolus	TG-RVivoLiverSingle - ticlopidine.High.9hr	Ticlopidine	H		9h	0.566138	0.0719719		0.436445	0.984619	0.91897	0.104917	-0.127714	0.636525	0.341345	-0.217271		0.246485	-0.411315						-0.106786		0.987359	0.154462	-0.0710849	-0.021746				0.824532		-0.390843		0.565294					0.0785202	-0.117025	-0.0330415
TG-GATES	Rat	Liver	vivo	repeat	TG-RVivoLiverRepeat - thioridazine.Low.4day	Thioridazine	L		4d	-0.0123276	0.0721482		0.00155594	0.0109008	0.0311398	-0.10478	0.230852	0.147408	0.126749	0.135868		-0.158407	0.453675						-0.113817		-0.302727	-0.00422567	-0.00352278	0.0564663				0.122568		0.0797663		-0.24799					0.0062012	0.100787	0.0184047
TG-GATES	Rat	Liver	vivo	bolus	TG-RVivoLiverSingle - ethinylestradiol.High.24hr	Ethinylestradiol	H		24h	0.100078	0.0721726		-0.723152	0.366603	0.219412	0.0327228	-0.0404122	0.151413	-0.124923	0.110892		-0.0232317	-0.621281						0.0635401		-0.239049	-0.0474721	0.844951	-0.226601				-0.806032		-0.510324		-0.168468					-0.0247447	-0.193074	0.044236
TG-GATES	Rat	Liver	vivo	bolus	TG-RVivoLiverSingle - fluphenazine.High.6hr	Fluphenazine	H		6h	-0.269751	0.0721796		-0.623525	-0.702255	0.03296	-0.300095	0.275564	-0.0162968	0.708822	0.0953134		0.143496	0.346764						0.0135554		-0.172466	-0.024724	-0.0253909	0.127611				-0.225575		0.124148		-0.632908					-0.0695296	0.0322384	0.0241468
TG-GATES	Rat	Liver	vitro	bolus	TG-Rvitro PRH - acetaminophen.High.24hr	Acetaminophen	H		24h	-0.190347	0.0722026		-0.212294	-0.533044	-0.646403	-0.0260024	-0.143873	-0.190649	-0.286671	-0.194829	0.231443	-0.126257	1.3654	0.0214591	0.405445			-0.261549	0.32767	0.12209	-0.395553	-0.126029	-0.519947	0.200425				0.588135		0.901405		0.678861				0.0538305	-0.272234	0.66305	0.114209
TG-GATES	Rat	Liver	vivo	repeat	TG-RVivoLiverRepeat - cisplatin.Middle.15day	Cisplatin	M		15d	0.0454018	0.0722084		-0.0361244	-0.152623	-0.286575	-0.194963	0.84913	0.127871	0.0502047	0.206313		-0.295437	-0.241254						-0.054415		0.403966	0.172807	0.0652097	0.264897				-1.37284		0.221049		1.62559					0.207367	-0.727029	0.0336358
TG-GATES	Rat	Liver	vitro	bolus	TG-Rvitro PRH - methapyrilene.Middle.2hr	Methapyrilene	M		2h	-0.10647	0.0723399		-0.0509066	0.322476	-0.307166	0.025884	-0.148421	-0.1156	-0.0437835	0.0534623	0.0548858	-0.0429127	0.119524	0.150427	0.0602458			-0.0954817	-0.0277074	-0.0350157	0.204399	0.0558093	-0.045218	-0.114747				0.220316		0.131487		0.074451				-0.0959612	0.0185352	0.181386	-0.0523369
TG-GATES	Rat	Liver	vitro	bolus	TG-Rvitro PRH - ethinylestradiol.High.24hr	Ethinylestradiol	H		24h	0.162928	0.0723504		0.206647	-0.0697742	0.130778	-0.111301	0.000403285	0.141333	0.135882	0.107137	0.0847071	0.275971	-0.0901724	-0.295631	0.137545			0.136813	-0.0630171	-0.0870932	0.376087	0.0127483	0.0636001	0.0608923				-0.121176		-0.303253		0.868859				0.172725	-0.0163744	-0.0492226	0.138333
TG-GATES	Rat	Liver	vitro	bolus	TG-Rvitro PRH - flutamide.Middle.8hr	Flutamide	M		8h	-0.00532318	0.0724269		0.00949055	-0.0422011	-0.0547404	-0.100924	-0.0792379	-0.0475287	-0.00343366	-0.00530262	0.038891	-0.0320658	0.290387	0.0796224	-0.0900447			0.100407	0.0657289	0.0661766	-0.144723	-0.0641146	0.0879603	-0.0242547				0.308588		0.134635		0.127954				-0.0598439	0.0913428	0.173126	-0.0319098
TG-GATES	Rat	Liver	vivo	bolus	TG-RVivoLiverSingle - metformin.Low.6hr	Metformin	L		6h	-0.0264629	0.0724445		-0.207075	-0.339673	0.0315014	-0.110644	-0.0605338	0.0780408	0.00367166	-0.0530418		0.0817929	0.0104295						0.0354502		-0.118254	0.00137382	0.136072	0.102088				0.134156		-0.0906159		-0.0850446					-0.0301142	0.360494	0.0654781
TG-GATES	Rat	Liver	vivo	bolus	TG-RVivoLiverSingle - aflatoxin B1.Low.24hr	Aflatoxin B1	L		24h	-0.222814	0.0725251		0.310391	0.21779	-0.593051	0.0496798	-0.359349	0.659965	-0.614301	0.431339		0.282126	-0.837206						-0.185949		-0.126697	-0.0845985	0.0766375	-0.507437				-1.35305		-0.293138		2.15507					-0.0465967	0.113971	0.007875
TG-GATES	Rat	Liver	vivo	repeat	TG-RVivoLiverRepeat - chlorpromazine.High.4day	Chlorpromazine	H		4d	-0.0629607	0.0727225		-0.539525	0.639127	0.00024773	0.145174	0.205168	0.0766783	1.11351	0.0824035		-0.152573	0.0901006						0.0816539		-0.803793	0.024508	0.762691	-0.130904				0.853937		-0.162857		1.1881					0.0708005	0.227585	-0.0231185
TG-GATES	Rat	Liver	vivo	repeat	TG-RVivoLiverRepeat - phenytoin.Middle.29day	Phenytoin	M		29d	-0.09855	0.072775		0.23031	0.171839	0.00760619	-0.211927	0.0909823	-0.104048	-0.160513	0.158276		-0.182599	-0.454437						0.0611514		-0.127431	0.107835	-0.122199	0.0540437				0.226237		-0.0128062		0.067161					-0.108673	0.0914166	0.0160983
TG-GATES	Rat	Liver	vivo	repeat	TG-RVivoLiverRepeat - desmopressin acetate.Middle.4day	Desmopressin acetate	M		4d	-0.127537	0.072787		-0.360909	-0.282265	-0.0282629	-0.047058	-0.377634	0.0607803	-0.23733	0.0332239		0.0845587	-0.311577						0.0672722		0.287906	-0.0486205	-0.100126	0.0391605				-0.592693		-0.103174		-0.0965992					-0.00501721	-0.112243	0.0214097
TG-GATES	Human	Liver	vitro	bolus	TG-HVitro PHH - imipramine.High.24hr	Imipramine	H		24h	-0.0555747	0.0728294	0.199172	0.0881419	0.0139049	0.198597	0.115576	0.101168	1.9615e-05	0.207068	-0.0570366	0.109174		-0.145759	0.0623875	-0.0227696	0.091584	0.162777	0.223234	0.110227	0.203403	-0.041506	-0.00183321	0.0199682		-0.0384142	0.100893	0.0974962	0.112997	0.0385176	0.110114	0.00818513	-0.0631672	0.00555723	0.050847	-0.0680504	0.207041	0.0555812		-0.0198771
TG-GATES	Rat	Liver	vitro	bolus	TG-Rvitro PRH - nefazodone.Low.24hr	Nefazodone	L		24h	0.187955	0.0728351		0.375535	0.159176	-0.522226	0.111886	0.346946	0.0184977	-0.0254145	-0.150644	0.0383474	0.199555	-0.295013	0.023006	0.217376			-0.0260454	-0.161962	0.383673	0.115352	-0.058424	-0.177459	-0.427835				-0.358334		-0.594374		-2.70578				-0.181132	0.0645015	-0.329399	-0.197507
TG-GATES	Rat	Liver	vitro	bolus	TG-Rvitro PRH - methapyrilene.Low.8hr	Methapyrilene	L		8h	-0.000281875	0.072872		0.0691914	-0.0367514	-0.031953	-0.0817641	-0.0134406	-0.0150073	-0.134742	-0.086423	0.033377	0.0792303	0.113661	-0.0444362	-0.121107			-0.0318607	-0.0469819	-0.0585546	-0.0696277	0.0932184	-0.139261	-0.0118176				0.268243		0.179563		-0.0127907				-0.0985212	0.0261392	0.0439807	0.0406066
TG-GATES	Rat	Liver	vitro	bolus	TG-Rvitro PRH - rifampicin.Low.8hr	Rifampicin	L		8h	0.0204536	0.0729442		0.0332792	-0.0255422	-0.0501432	-0.0509664	0.0172702	0.00653879	-0.0439425	-0.00386098	0.0451474	0.0325608	0.11864	-0.0300991	-0.0352632			-0.0339485	0.0258538	0.0505076	-0.00180634	-0.157361	-0.0241909	0.0879364				0.0896687		0.00180359		0.0505362				-0.00648912	0.071903	0.0707338	0.0683411
TG-GATES	Rat	Liver	vivo	repeat	TG-RVivoLiverRepeat - amitriptyline.Middle.29day	Amitriptyline	M		29d	0.0554822	0.0729669		-0.0833376	0.0965999	0.243885	0.0172038	0.447634	-0.103396	-0.12621	-0.135876		-0.0977731	0.0202939						0.0716209		0.378726	0.0590176	-0.0544863	-0.0156249				0.136635		0.123609		0.73246					-0.0743043	-0.269708	-0.0292627
TG-GATES	Rat	Liver	vivo	repeat	TG-RVivoLiverRepeat - sulindac.Low.15day	Sulindac	L		15d	-0.0443518	0.0731653		0.0664158	-0.169634	-0.14579	-0.0299352	0.610669	0.0189035	-0.0881321	0.0134264		0.0925115	-0.0405093						0.0910809		0.0627188	0.0323415	-0.00389271	-0.129066				-0.0807519		0.121095		0.789562					-0.130991	0.0166685	0.0125117
TG-GATES	Rat	Liver	vivo	bolus	TG-RVivoLiverSingle - quinidine.Middle.24hr	Quinidine	M		24h	0.0234973	0.0732571		-0.0421764	0.178447	-0.355696	0.30883	-0.133421	0.204223	-0.0557168	0.0197511		-0.312194	-0.0552007						0.0276052		0.401623	-0.0554601	-0.153756	0.0414727				-0.0991141		-0.500944		0.463108					0.106482	-0.200423	-0.00797818
TG-GATES	Rat	Liver	vitro	bolus	TG-Rvitro PRH - lomustine.Low.24hr	Lomustine	L		24h	-0.0328306	0.0732764		0.0839708	-0.0916085	0.189426	-0.0610167	-0.16152	0.0805236	0.0710429	-0.058246	-0.0791977	0.00220049	0.00782181	-0.0499177	0.26557			0.00249935	-0.00579163	-0.194258	0.0995075	-0.0132355	0.00517001	-0.00603021				-0.0670351		-0.311949		0.287308				-0.0225143	0.0144258	-0.0711325	-0.0185351
TG-GATES	Rat	Kidney	vivo	bolus	TG-RVivoKidneySingle - cisplatin.Middle.24hr	Cisplatin	M		24h	-0.0462509	0.0733652	-0.0396534	0.647365	-0.00621382	0.059138	-0.137634	-0.0859296	0.11935	-0.132615	-0.00774272	-0.000609371	0.127935	0.283415		0.196463			0.0656073	-0.108892	-0.0171306	0.228915	0.126495	-0.0436494	-0.129091				0.490559		0.0674124		0.023519				-0.0634927	0.193245	-0.0589009	0.00934473
TG-GATES	Rat	Kidney	vivo	repeat	TG-RVivoKidneyRepeat - clofibrate.High.4day	Clofibrate	H		4d	-0.0954613	0.0733685	0.0954916	0.323999	0.0298993	-0.345065	-0.0468654	-0.0184064	0.0960735	0.183087	-0.00991882	0.011572	0.622335	0.0703956		-0.0164042			0.112427	0.0502528	0.147229	0.02585	0.177293	0.039584	-0.378051				0.157202		-0.0496998		0.160922				0.0462797	0.0145615	0.0357038	0.0396864
TG-GATES	Human	Liver	vitro	bolus	TG-HVitro PHH - meloxicam.High.24hr	Meloxicam	H		24h	0.0403546	0.0735288	0.162009	0.435203	0.155859	-0.101925	0.108223	0.0188302	0.163172	0.0857208	-0.131882	-0.135015		0.0230501	0.0963895	0.0374579	-0.0172597	-0.0446713	0.118948	0.032088	0.0116925	0.0611512	0.0830953	0.0133614		0.070233	0.147722	0.114493	0.0668116	0.0590415	0.0936806	-0.0142926	0.0775563	0.169611	0.0336913	-0.0123046	-0.0257968	0.0479753		-0.0166225
TG-GATES	Rat	Liver	vivo	bolus	TG-RVivoLiverSingle - nimesulide.Low.3hr	Nimesulide	L		3h	-0.146538	0.0735986		-0.00146714	-0.336292	-0.0794457	-0.235184	-0.00459831	0.0399721	0.0929554	0.0792063		-0.403235	0.927263						-0.0543755		0.485256	-0.0896469	-0.29952	0.13172				-0.0730417		0.407266		-0.519457					-0.1829	0.272816	-0.0124405
TG-GATES	Rat	Liver	vivo	bolus	TG-RVivoLiverSingle - tolbutamide.Low.6hr	Tolbutamide	L		6h	0.0829334	0.0736534		0.315435	0.672497	-0.0834041	0.0875917	0.594351	0.00625073	-0.622998	0.111282		0.0526299	-0.13491						0.113524		0.416316	-0.296622	-0.0561663	-0.041743				-1.91774		0.00396035		0.422951					-0.00797434	-0.423882	-0.0167027
TG-GATES	Rat	Liver	vivo	repeat	TG-RVivoLiverRepeat - methyltestosterone.High.4day	Methyltestosterone	H		4d	-0.148373	0.073656		-0.214797	0.0845683	-0.168275	-0.0942309	0.0302363	0.0156578	0.212051	-0.0620016		0.339712	-0.277369						0.0829827		-0.412122	0.12386	-0.00732525	0.178925				-0.160023		0.0608868		0.0227274					-0.00643662	-0.526777	0.00874502
TG-GATES	Human	Liver	vitro	bolus	TG-HVitro PHH - phorone.Middle.24hr	Phorone	M		24h	-0.178423	0.0736612	0.068292	0.390113	-0.200975	0.120882	0.192875	0.0526099	0.589977	-0.140503	-0.0942944	0.0737337		-0.199846	0.0238704	0.107921	0.0945969	0.308691	0.210469	0.20933	0.830162	-0.366672	0.0217573	0.195628		-0.322578	0.151473	0.528885	0.166183	0.0672724	0.0861611	0.0928837	-0.698567	-0.0833387	-0.00647143	0.272191	0.0619152	-0.0530257		0.0368964
TG-GATES	Rat	Liver	vivo	repeat	TG-RVivoLiverRepeat - trimethadione.High.4day	Trimethadione	H		4d	-0.0710095	0.0737121		0.222493	2.26473	-0.00249801	-0.170741	-0.330609	0.284369	0.467134	-0.181762		0.221024	-1.02717						-0.0239125		-0.255376	-0.0616695	0.626449	0.0602808				-2.25669		-0.399907		2.53591					0.110426	-0.73891	-0.0594135
TG-GATES	Rat	Liver	vivo	repeat	TG-RVivoLiverRepeat - naproxen.Middle.8day	Naproxen	M		8d	-0.163081	0.07373		-0.290099	0.0637435	-0.0925653	-0.139129	-0.0512578	-0.0841799	-0.353792	0.115386		0.0795936	-0.264104						0.0248151		0.364464	-0.0185486	-0.0817492	-0.173287				-0.204906		0.117759		0.74097					0.15472	-0.309281	0.0129714
TG-GATES	Rat	Liver	vivo	repeat	TG-RVivoLiverRepeat - gemfibrozil.High.8day	Gemfibrozil	H		8d	-0.151931	0.0737349		-0.370952	2.34491	0.308223	-0.201371	0.0791008	0.515443	0.091834	-0.220867		2.64052	0.0533703						-0.013214		0.330059	0.0739512	0.332825	-0.0840359				-2.06986		0.00600174		3.67403					-0.0910444	-0.716917	-0.19179
TG-GATES	Rat	Liver	vivo	bolus	TG-RVivoLiverSingle - nitrofurazone.High.9hr	Nitrofurazone	H		9h	0.0312247	0.0737729		0.0598275	1.5192	2.10828	0.0896805	-0.480837	0.532383	-0.433111	-0.257666		0.719376	-0.264325						0.084763		-0.482776	0.105767	0.0391383	-0.0526446				0.450147		-0.413389		0.468989					0.0159997	-0.591844	-0.0485749
TG-GATES	Rat	Liver	vitro	bolus	TG-Rvitro PRH - simvastatin.High.2hr	Simvastatin	H		2h	0.0413471	0.0738273		-0.0560865	0.0914061	0.0294885	-0.106642	0.0577895	0.00381311	0.0188515	-0.0774043	0.012481	0.389854	-0.155876	-0.211353	0.062603			0.10669	-0.00426797	0.0366929	-0.204039	0.048367	0.0244375	0.0334292				-0.179282		0.0981804		-0.0605411				0.0347292	0.0103966	0.0746192	0.0238747
TG-GATES	Rat	Liver	vitro	bolus	TG-Rvitro PRH - lomustine.Middle.24hr	Lomustine	M		24h	-0.00503368	0.0739859		0.226665	0.0474805	0.0876965	-0.0312929	-0.0454533	-0.00161776	-0.0605765	-0.0295897	-0.0530227	-0.0406228	0.0919864	0.0621011	0.116885			-0.0493776	0.0532703	-0.0973842	0.210295	-0.0364943	-0.0588543	-0.113365				-0.0362242		-0.247879		0.471675				-0.0306808	0.182384	-0.150135	-0.0253363
TG-GATES	Rat	Liver	vivo	bolus	TG-RVivoLiverSingle - diethyl maleate.Middle.6hr	Diethylmaleate	M		6h	0.185591	0.0740029		0.110655	1.23703	1.86309	-0.0125884	0.115086	0.081754	-0.189197	-0.188915		0.474631	-0.0401713						-0.00937791		-0.221209	-0.139574	-0.239832	-0.242322				-0.453636		-0.480716		0.820489					0.106826	-0.621326	0.0656158
TG-GATES	Rat	Liver	vivo	repeat	TG-RVivoLiverRepeat - pemoline.Middle.8day	Pemoline	M		8d	0.156181	0.0740602		0.312744	-0.107373	0.0405298	-0.00337994	-0.173059	0.0158364	-0.0187469	-0.0433267		-0.114857	0.146326						-0.0248565		0.176139	0.103431	-0.185965	-0.0382727				0.499522		0.287565		-0.0257959					0.000355221	0.247956	0.00262815
TG-GATES	Human	Liver	vitro	bolus	TG-HVitro PHH - aspirin.Low.24hr	Aspirin	L		24h	-0.00419397	0.0740755	-0.13533	0.0414327	0.0566306	0.0142336	0.0500277	-0.0901885	-0.0105524	-0.00931726	0.0859494	0.116162		0.0429585	-0.223298	-0.0833287	-0.00830343	-0.157438	0.0511217	0.102828	0.148646	0.0187409	-0.0332152	-0.0331993		-0.143317	-0.0620246	0.0566802	-0.0987381	0.0071824	0.0182955	-0.105955	0.0311513	-0.120004	-0.0781508	-0.0102997	0.048936	0.0243648		-0.00158173
TG-GATES	Rat	Liver	vitro	bolus	TG-Rvitro PRH - dantrolene.High.2hr	Dantrolene	H		2h	-0.027968	0.0740761		-0.160977	0.392324	-0.117481	0.0857125	-0.0217364	-0.0443469	0.012136	-0.0997066	-0.0280602	0.153072	-0.0168196	0.104513	0.204742			0.0541157	-0.131646	-0.0976625	0.0316233	0.255873	-0.103973	0.0543591				-0.255279		0.00624206		0.0913126				0.00336904	-0.0898241	-0.0117467	0.0190934
TG-GATES	Rat	Liver	vivo	bolus	TG-RVivoLiverSingle - amitriptyline.High.9hr	Amitriptyline	H		9h	-0.026989	0.0741338		-0.328356	0.840714	-0.146771	-0.0528385	-0.511694	0.146348	-0.308259	0.0338552		-0.0448074	0.265099						0.0261398		0.768881	0.209507	0.083569	0.0615916				0.66387		-0.138931		1.00195					0.0924217	0.145184	-0.0215713
TG-GATES	Human	Liver	vitro	bolus	TG-HVitro PHH - chlorpromazine.Low.2hr	Chlorpromazine	L		2h	-0.084286	0.074405	-0.0140992	0.0443101	-0.0167684	0.117585	0.140162	-0.0919677	-0.0263676	0.0811506	0.155592	0.125349		-0.0960692	-0.0310854	-0.0664141	-0.145588	0.102522	0.0047004	0.0948583	-0.0521361	0.129028	-0.225726	-0.0393155		0.0935921	0.196498	0.0253202	-0.0435024	-0.00221184	0.0307052	0.053122	-0.0353824	0.130854	-0.130131	0.0272206	0.0973276	-0.0860846		0.00801306
TG-GATES	Rat	Liver	vitro	bolus	TG-Rvitro PRH - cimetidine.Middle.24hr	Cimetidine	M		24h	0.0325235	0.0746069		0.116846	0.105061	-0.0542549	-0.0316769	-0.00786533	-0.0825636	0.116407	0.0812544	-0.0272954	-0.12107	-0.0368331	-0.0502535	0.0697478			-0.0504842	-0.0639173	-0.105241	-0.138351	0.0804653	-0.0702095	-0.00579254				0.190265		-0.182209		0.00324253				-0.00418478	-0.037193	-0.0658529	0.0497811
TG-GATES	Rat	Liver	vivo	bolus	TG-RVivoLiverSingle - butylated hydroxyanisole.High.3hr	Butylated hydroxyanisole	H		3h	0.00290997	0.0746227		-0.169612	0.0279471	0.0201311	-0.0710505	0.353287	0.109869	0.385398	-0.0113301		-0.152829	-0.0197555						-0.0106155		0.24871	0.0931141	-0.286845	0.047513				0.450392		0.07507		0.026143					-0.0643877	-0.8286	0.0075487
TG-GATES	Rat	Liver	vivo	repeat	TG-RVivoLiverRepeat - diclofenac.Middle.8day	Diclofenac	M		8d	0.00598321	0.0746361		0.244632	-0.0365441	-0.0365742	-0.0619474	-0.261153	0.135944	0.239999	-0.227793		-0.126715	-0.0340767						-0.0595244		0.105543	-0.0309614	-0.0133998	-0.0106071				0.816613		0.114882		-0.403023					0.0421745	-0.21906	-0.0378773
TG-GATES	Human	Liver	vitro	bolus	TG-HVitro PHH - bucetin.High.8hr	Bucetin	H		8h	0.0449575	0.0748226	0.124174	0.111844	-0.00728111	-0.0381126	0.0686372	0.158147	0.0195321	-0.0350237	-0.112554	-0.242657		-0.0411604	0.224819	0.0577567	-0.0150092	-0.102799	0.0852096	0.021056	-0.133495	0.0336977	0.0160258	0.0182457		-0.117928	0.250278	0.173802	0.0121376	0.0750129	0.0943952	-0.186541	-0.0102674	0.123552	0.00826327	0.0466457	-0.0628811	-0.0167432		0.00119099
TG-GATES	Rat	Liver	vivo	bolus	TG-RVivoLiverSingle - rifampicin.High.24hr	Rifampicin	H		24h	0.0320904	0.0748447		-0.137426	0.100404	0.181868	-0.154954	-0.705237	0.147458	-0.301398	-0.0379635		0.601604	0.401137						-0.00971709		0.279367	-0.114125	0.00289141	0.000403397				-0.533451		-0.215447		0.893066					-0.107569	0.1815	0.0150695
TG-GATES	Human	Liver	vitro	bolus	TG-HVitro PHH - ethionine.High.2hr	Ethionine	H		2h	0.130204	0.0748474	-0.000292126	0.125453	0.220303	-0.0479879	-0.17814	0.0459933	0.0112342	0.0531358	0.042636	-0.159756		0.0801222	0.0996246	-0.0270558	0.0716558	-0.297963	0.128375	0.00275608	-0.0505969	0.0912069	0.0732326	0.00322011		0.107264	-0.139331	0.200389	0.0177887	0.0582909	0.0473954	0.109833	0.18629	0.0662989	0.116946	-0.0442837	-0.0971218	0.0130604		-0.0129952
TG-GATES	Rat	Liver	vivo	repeat	TG-RVivoLiverRepeat - gemfibrozil.Low.15day	Gemfibrozil	L		15d	-0.378206	0.0748872		-0.703452	0.948862	0.58455	0.0604246	1.03351	0.29512	0.128202	-0.402208		2.5573	-0.253266						0.0285603		0.297731	-0.10763	0.0984532	-0.0181323				-1.41885		0.221817		3.62507					0.254743	-0.661596	-0.149477
TG-GATES	Rat	Liver	vivo	bolus	TG-RVivoLiverSingle - isoniazid.Low.9hr	Isoniazid	L		9h	0.0267388	0.0749007		-0.321111	-0.0805345	0.257677	0.132958	-0.351683	-0.0137653	0.284418	-0.0991747		-0.122273	0.0928296						0.0029458		0.0941025	0.0986114	0.0078163	0.0948375				-0.502217		-0.221384		-0.155347					0.169652	0.131709	-0.0108033
TG-GATES	Rat	Kidney	vivo	repeat	TG-RVivoKidneyRepeat - acetazolamide.Middle.8day	Acetazolamide	M		8d	-0.106018	0.0751801	0.108133	0.346461	0.107194	-0.189238	-0.156774	-0.0592138	-0.0425296	-0.00703758	-0.0500065	0.191625	-0.115102	0.391595		-0.357517			0.0179552	-0.196551	0.0736785	0.087558	0.115225	-0.11432	-0.149234				-0.000265411		0.0822238		-0.0254096				0.0549253	0.21745	0.111933	-0.130958
TG-GATES	Rat	Liver	vivo	repeat	TG-RVivoLiverRepeat - bromobenzene.Low.15day	Bromobenzene	L		15d	-0.0519125	0.0752316		0.0979844	0.195216	-0.33672	-0.0383438	0.260433	0.142747	-0.226829	0.0517092		0.0564403	-0.291324						0.0756794		0.268895	0.00957832	0.0570614	0.0637041				0.486362		0.128252		2.01762					0.0515273	-0.138452	-0.0143891
TG-GATES	Human	Liver	vitro	bolus	TG-HVitro PHH - labetalol.Middle.8hr	Labetalol	M		8h	0.0786471	0.0753234	-0.105828	0.149273	-0.0448233	0.0551588	-0.0476299	0.166004	0.0845726	0.00352477	0.0386995	0.0386611		-0.10776	-0.0366106	0.0993055	-0.225662	0.0146767	0.0371616	-0.0027917	0.259188	0.0579788	-0.0829132	0.118796		0.0236576	-0.159592	0.0954454	0.025807	0.0149653	-0.020817	0.00198621	-0.0138478	0.210658	0.0805951	-0.0210178	-0.125026	-0.00377706		0.0489369
TG-GATES	Human	Liver	vitro	bolus	TG-HVitro PHH - cimetidine.High.2hr	Cimetidine	H		2h	-0.0215268	0.0754835	0.044268	0.0813858	0.00988988	0.0417051	-0.0401763	0.0143646	-0.0274349	-0.0166664	0.0600842	-0.00226024		0.0812531	0.126129	-0.0399712	-0.00145002	-0.0176697	0.00154655	-0.0432952	0.0464498	-0.0665228	-0.0554748	0.0564009		-0.133736	-0.219499	-0.0977776	0.00312532	0.0115742	-0.00397733	0.0349222	-0.025131	-0.01679	-0.0130064	0.0331394	0.0676932	0.0415525		-0.0255341
TG-GATES	Rat	Liver	vivo	bolus	TG-RVivoLiverSingle - methimazole.High.9hr	Methimazole	H		9h	0.295385	0.0755254		0.246131	0.735152	2.16539	-0.123657	-0.190876	0.361192	-0.395213	-0.0340988		0.175259	-0.166857						0.0743523		-0.101494	-0.0990018	0.114013	-0.0792293				-0.57246		-0.234054		0.244769					-0.053723	-0.382229	-0.0189411
TG-GATES	Rat	Kidney	vivo	bolus	TG-RVivoKidneySingle - doxorubicin.Low.24hr	Doxorubicin	L		24h	0.0393775	0.0755554	0.194763	0.281856	0.154824	-0.0130084	0.0413719	0.0568824	0.0361237	-0.0544232	0.0249901	0.0999639	-0.00106768	-0.380423		-0.085521			0.0250121	-0.118651	0.212443	0.160318	-0.0253533	-0.0609243	-0.0500007				-0.655011		-0.0249229		0.122102				0.0361241	0.0258063	-0.0262379	0.108184
TG-GATES	Rat	Liver	vitro	bolus	TG-Rvitro PRH - diethyl maleate.Low.8hr	Diethylmaleate	L		8h	-0.130248	0.0755664		0.293349	0.279851	0.41057	-0.295371	-0.150181	-0.0311208	0.102392	-0.276432	0.0346192	-0.0265467	-0.0102723	0.13314	-0.162338			0.0820322	-0.103902	0.272112	0.169124	-0.0399082	0.157462	-0.340078				0.041569		0.380659		-0.210649				0.100963	0.0642963	-0.0832203	-0.0079418
TG-GATES	Rat	Kidney	vivo	repeat	TG-RVivoKidneyRepeat - nitrofurantoin.Middle.4day	Nitrofurantoin	M		4d	0.0208974	0.0755843	0.126564	0.194106	0.03212	-0.128268	0.0123751	0.0792337	0.0446028	0.19689	-0.0125039	0.110138	0.0373975	0.271825		-0.0264558			-0.042812	0.0313254	0.0184984	0.0867336	-0.00734996	0.0474297	0.210194				0.169152		0.0271269		0.102305				0.0515381	-0.227055	0.100274	-0.0996499
TG-GATES	Human	Liver	vitro	bolus	TG-HVitro PHH - gemfibrozil.High.2hr	Gemfibrozil	H		2h	-0.071787	0.0755876	0.0124182	0.0505476	-0.0347257	-0.0169008	0.0736818	-0.00512789	-0.0547468	-0.0521106	0.0430707	0.129152		0.0211792	-0.167129	-0.0639	-0.0600307	-0.029118	-0.0986499	0.0877555	-0.0500345	0.165815	0.0922903	-0.00604842		-0.0339646	-0.107054	0.0166209	0.0259933	-0.0428651	0.0364001	-0.0203276	-0.076552	0.00097377	-0.00195804	0.0154323	0.0365894	-0.0930939		0.0587091
TG-GATES	Rat	Liver	vivo	repeat	TG-RVivoLiverRepeat - phenacetin.Middle.15day	Phenacetin	M		15d	-0.154227	0.0756448		0.0931542	-0.0730814	0.154604	0.223095	-0.0923608	0.0769621	-0.241533	-0.000968764		0.0353515	-0.222831						0.12381		-0.146999	0.0190815	0.0264813	-0.00748582				-0.445017		0.0375266		0.674846					0.255265	0.191401	-0.0485135
TG-GATES	Rat	Liver	vivo	bolus	TG-RVivoLiverSingle - bendazac.Middle.9hr	Bendazac	M		9h	0.258602	0.0756629		0.254924	0.609837	0.391825	0.190499	0.155927	0.0618186	-0.122955	-0.0586405		1.8274	-0.029487						-0.0881233		-0.121325	-0.027372	0.279054	0.0803142				-0.138431		-0.755589		1.17835					-0.198817	0.207165	0.0372335
TG-GATES	Rat	Liver	vivo	bolus	TG-RVivoLiverSingle - tetracycline.Low.6hr	Tetracycline	L		6h	0.0398029	0.0757537		-0.125796	-0.498574	-0.0255747	0.0153767	0.35807	0.0499239	0.156606	0.01896		-0.0139767	0.321521						0.0229726		0.241117	-0.0397677	-0.138189	0.0887423				-1.32794		-0.227407		-0.392143					-0.115162	-0.316306	0.00652458
TG-GATES	Human	Liver	vitro	bolus	TG-HVitro PHH - naphthyl isothiocyanate.Low.24hr	Naphthyl isothiocyanate	L		24h	-0.0135147	0.0757954	-0.0978631	0.0226231	-0.00637848	0.156917	-0.0105409	-0.165015	0.0706892	0.0975323	0.00541971	-0.119675		-0.0550539	-0.189708	0.0182357	-0.0315352	0.0825772	0.132617	-0.0218599	-0.0279496	-0.0800108	0.155319	-0.027158		-0.144681	0.0450978	-0.0895075	-0.131042	-0.0684731	-0.0103957	-0.00698737	0.0778016	-0.0202402	0.00614943	0.0450043	0.0406665	-0.0156376		-0.0886431
TG-GATES	Rat	Liver	vitro	bolus	TG-Rvitro PRH - phenytoin.Middle.24hr	Phenytoin	M		24h	0.0219368	0.0758147		0.011226	0.026775	0.0512936	-0.00843596	-0.0405816	0.0359918	0.0317453	-0.0485586	-0.00510048	-0.00452809	0.20005	0.0353015	0.21442			-0.0101185	0.0476147	-0.00183105	-0.0733247	0.0606054	0.0461045	-0.00677092				-0.018723		-0.147214		0.0635186				-0.0526951	0.068291	0.0460514	0.0331376
TG-GATES	Rat	Liver	vivo	bolus	TG-RVivoLiverSingle - meloxicam.Low.6hr	Meloxicam	L		6h	0.155515	0.0758867		-0.351916	0.03495	0.0359376	0.294177	0.0204287	-0.0653729	0.348847	-0.379004		0.201149	0.00887711						0.195884		0.507187	0.0908671	-0.0322903	0.0678747				0.527932		-0.453455		-0.432749					0.175592	-0.0686019	-0.0260007
TG-GATES	Rat	Liver	vivo	bolus	TG-RVivoLiverSingle - aspirin.High.3hr	Aspirin	H		3h	-0.0822224	0.0759416		-0.345146	0.00369775	-0.302888	-0.00799034	0.584521	-0.0605251	-0.320192	0.0760932		0.210713	0.138101						0.104553		0.416567	-0.0681879	-0.163478	0.343924				-0.53836		0.0275137		-0.635353					0.0916929	-0.148103	-0.0235945
TG-GATES	Human	Liver	vitro	bolus	TG-HVitro PHH - perhexiline.Middle.24hr	Perhexiline	M		24h	0.0860567	0.0760914	-0.00353463	0.133213	0.00780783	0.109356	0.0562022	-0.0786163	-0.091545	0.0891914	-0.0258544	-0.0159612		0.0309772	-0.117871	-0.13249	0.0289591	0.0515885	-0.206075	0.194715	0.161236	-0.336945	-0.0674551	0.0713464		-0.0875892	0.057458	0.0656822	-0.0495672	0.0186195	-0.103931	0.0756408	-0.0771031	-0.0811729	-0.0536142	0.0957836	0.0449278	0.0371935		-0.0364821
TG-GATES	Rat	Kidney	vivo	bolus	TG-RVivoKidneySingle - desmopressin acetate.Low.6hr	Desmopressin acetate	L		6h	0.141812	0.0761202	-0.00142079	0.10853	0.0098749	-0.115009	-0.312735	0.0706982	-0.115196	-0.0413865	-0.132093	0.0120362	0.0957968	-0.409013		0.247626			0.0281612	-0.0894955	0.189423	-0.249241	0.0461925	0.128548	0.0760165				-0.525192		0.1668		-0.16163				-0.0654396	-0.305765	0.0727175	-0.0127984
TG-GATES	Rat	Liver	vitro	bolus	TG-Rvitro PRH - flutamide.Low.8hr	Flutamide	L		8h	-0.0694756	0.0761557		-0.00229495	0.00352466	-0.051501	-0.154274	-0.0229619	-0.0893241	0.0196405	0.0565898	0.0763731	-0.00670853	0.241479	0.169631	-0.0340646			0.0873745	-0.0259146	0.0614824	-0.0327501	0.0508585	0.0920082	-0.0258182				0.248077		0.00679459		0.106751				-0.101605	0.0181521	0.0542206	-0.0479223
TG-GATES	Rat	Liver	vivo	bolus	TG-RVivoLiverSingle - chloramphenicol.Middle.6hr	Chloramphenicol	M		6h	0.163368	0.0761566		0.263823	0.416236	0.0485834	-0.0541716	-0.0856324	0.0817037	-0.158173	-0.0552384		-0.164112	0.120169						-0.0339646		0.0945516	-0.0153376	0.0431828	0.0235352				-1.12987		-0.217054		0.192385					0.0422204	0.0744216	0.03818
TG-GATES	Rat	Liver	vivo	repeat	TG-RVivoLiverRepeat - ciprofloxacin.Low.4day	Ciprofloxacin	L		4d	0.156408	0.0761879		-0.197941	-0.0286536	-0.0710963	0.0240493	0.0201407	-0.10208	0.0427818	0.0260481		0.207765	-0.259371						0.0323099		0.171264	-0.0182698	0.102337	0.112199				-0.4297		-0.0907399		0.876371					0.133025	0.0771146	0.0285836
TG-GATES	Rat	Kidney	vivo	bolus	TG-RVivoKidneySingle - methyltestosterone.Low.3hr	Methyltestosterone	L		3h	-0.0186263	0.0763063	-0.145419	0.1312	0.0647013	-0.131144	-0.177841	0.0152062	-0.035266	0.0641861	-0.00625703	0.134223	-0.0186831	-0.149852		-0.0313644			0.0106067	-0.00328578	0.112755	-0.236666	-0.132246	0.0674081	0.142177				0.248944		-0.00198123		0.105705				-0.050349	-0.175145	0.110355	-0.131833
TG-GATES	Rat	Liver	vivo	bolus	TG-RVivoLiverSingle - nitrofurazone.Middle.9hr	Nitrofurazone	M		9h	-0.0027516	0.0763104		0.130745	1.43147	1.86334	0.0421738	-0.0670591	0.41974	-0.53759	-0.131446		0.0649614	-0.564426						0.0261667		-0.247714	0.0771048	0.086974	-0.000647768				0.659809		-0.133341		0.346342					0.0954679	-0.297364	-0.025948
TG-GATES	Rat	Liver	vitro	bolus	TG-Rvitro PRH - fenofibrate.High.8hr	Fenofibrate	H		8h	-0.0198034	0.0763538		-0.0380247	0.0342707	-0.161137	-0.0469887	-0.132688	0.0277705	0.293161	-0.087617	0.0654909	1.15481	0.174409	-0.066307	0.259698			-0.0764859	-0.0094574	0.209799	-0.238004	-0.120736	0.0299167	-0.0336585				0.185345		-0.281271		0.29314				0.0257417	0.0160306	0.113057	0.0300504
TG-GATES	Rat	Liver	vivo	bolus	TG-RVivoLiverSingle - methylene dianiline.Low.24hr	Methylene dianiline	L		24h	0.0295849	0.0763548		-0.00705373	0.680761	0.327629	-0.0923822	0.209062	0.0852097	-0.186561	-0.128101		0.0448992	-0.678724						-0.0313463		-0.659219	-0.0422806	0.0609379	-0.0377845				-0.0990761		-0.208071		1.40582					-0.0357672	-0.274341	-0.0296666
TG-GATES	Rat	Liver	vivo	bolus	TG-RVivoLiverSingle - moxisylyte.Middle.6hr	Moxisylyte	M		6h	-0.152866	0.0765334		-0.238152	-0.0727589	0.0719762	-0.168173	-0.322803	-0.063883	0.222739	0.0816595		0.0600286	0.297962						-0.119215		0.0530918	-0.109346	-0.0536781	-0.0431041				-0.209842		0.270065		0.108267					-0.0191413	0.0832735	0.0032624
TG-GATES	Rat	Kidney	vivo	repeat	TG-RVivoKidneyRepeat - acetazolamide.Low.4day	Acetazolamide	L		4d	-0.0114463	0.076571	-0.0637654	0.0860122	-0.0651669	0.0315856	0.232947	-0.113101	0.0436477	0.240769	-0.058332	-0.0263187	-0.0312903	-0.127343		-0.084679			0.0367226	-0.0691801	-0.0437365	0.247127	-0.0708816	-0.304389	-0.098656				0.611873		0.0942238		0.0774041				-0.00484026	-0.141377	0.0221397	0.134529
TG-GATES	Rat	Liver	vivo	repeat	TG-RVivoLiverRepeat - vitamin A.Middle.29day	Vitamin A	M		29d	0.0453105	0.0766087		-0.188818	0.0171511	0.0403559	0.107981	0.368371	0.14332	0.00614712	0.0174493		0.207106	-0.365055						-0.0176165		-0.0690963	-0.0327609	-0.00694795	-0.0990383				0.380716		-0.654664		-0.307532					-0.13744	0.529982	-0.0115579
TG-GATES	Rat	Liver	vivo	bolus	TG-RVivoLiverSingle - butylated hydroxyanisole.Low.6hr	Butylated hydroxyanisole	L		6h	0.380501	0.0766236		0.924161	0.786005	1.60185	0.0529007	-0.0537047	0.183084	-0.131254	-0.0470513		0.111235	-0.728903						-0.0781633		-0.233486	-0.164764	-0.00181314	0.00139086				-0.773463		-0.0814139		1.06714					-0.0822414	-0.132223	-0.0132327
TG-GATES	Rat	Liver	vivo	bolus	TG-RVivoLiverSingle - gefitinib.Middle.9hr	Gefitinib	M		9h	-0.0861272	0.0766316		-0.125626	-0.134328	0.375484	0.0870912	-0.533089	0.129454	-0.0750125	0.0987982		0.3999	-0.673164						0.086882		-0.129506	0.0142865	-0.00468478	-0.234152				-0.484584		0.0907042		0.454975					-0.0183408	-0.220965	0.00924146
TG-GATES	Rat	Liver	vivo	bolus	TG-RVivoLiverSingle - galactosamine.Middle.9hr	Galactosamine	M		9h	-0.103382	0.07667		-0.250785	0.099915	-0.163566	-0.10601	0.645082	0.0386423	0.0980366	-0.014294		0.174822	-0.371319						0.178816		-0.0885237	0.105492	-0.100599	0.089254				-0.353822		-0.0465314		0.494701					-0.055107	-0.0329731	0.024546
PREDICT-IV	Human	Liver	vitro	bolus	PIV Hvitro Repeat PHH - EMD33_LD1_LFC	EMD335823	L		1d	-0.0870276	0.0767119	-0.0503846	0.584092	-0.0486347	0.163652	0.0545687	-0.0167984	0.018853	0.0308764	-0.165883	0.197976	-0.409968	-0.187867	0.0339971	-0.248951	-0.131783	0.111576	-0.0211393	0.119605	-0.046202	-0.246268	0.0231814	0.431795	-0.216128	-0.125863	0.0666533	0.124974	0.0309815	0.796826	0.188618	-0.113035	-0.150989	-0.0867504	-0.107629	-0.0740399	-0.0310248	0.173636	-0.57898	-0.0243942
TG-GATES	Rat	Kidney	vivo	repeat	TG-RVivoKidneyRepeat - allopurinol.Middle.8day	Allopurinol	M		8d	-0.0240167	0.076718	0.0352821	-0.0990547	0.23686	-0.105272	-0.00887409	-0.0538322	0.0855094	0.130528	0.00723402	0.107926	-0.0537718	0.257878		-0.00977818			0.0578249	-0.115455	-0.0788093	0.0365188	-0.014491	-0.0131187	-0.13922				0.886283		0.066407		-0.00807377				0.0208637	-0.173378	-0.0110833	0.133353
TG-GATES	Rat	Liver	vivo	repeat	TG-RVivoLiverRepeat - captopril.Middle.29day	Captopril	M		29d	0.0572611	0.0767562		-0.0283643	0.298313	-0.0760625	-0.226195	-0.971193	0.0022665	-0.17329	-0.224175		0.09652	0.46814						-0.0497246		0.230335	0.00906129	0.0316468	-0.0221224				0.75007		-0.196542		1.12015					0.000383023	-0.0395237	-0.0544269
TG-GATES	Human	Liver	vitro	bolus	TG-HVitro PHH - amiodarone.Middle.24hr	Amiodarone	M		24h	-0.0349088	0.0768621	0.0752272	-0.0606436	0.0248885	-0.0918674	-0.0418584	-0.0273339	0.0546364	-0.00303216	-0.0401394	-0.08624		-0.00166078	-0.112212	-0.0249409	-0.0497177	-0.0752208	0.0618069	0.118183	-0.175533	0.0312072	-0.19508	0.091472		0.0666667	-0.155221	-0.0215808	0.0488182	-0.00417125	-0.00644465	-0.0393764	-0.0587735	0.182151	0.0876681	0.12766	-0.0352358	0.196269		-0.0143939
TG-GATES	Rat	Liver	vivo	bolus	TG-RVivoLiverSingle - aspirin.Low.9hr	Aspirin	L		9h	-0.558914	0.0769037		-0.582121	0.00833641	-0.304558	-0.121969	-0.204996	0.0975423	-0.0703661	-0.0393117		0.78419	-0.720862						-0.215469		-0.4741	0.0756362	0.501331	-0.0209295				0.465118		-0.369289		-0.33359					0.0957004	0.022831	0.0204238
TG-GATES	Rat	Liver	vitro	bolus	TG-Rvitro PRH - ticlopidine.Middle.8hr	Ticlopidine	M		8h	0.0363048	0.077008		0.309486	0.134666	-0.123393	0.102404	-0.236302	0.083386	-0.00721604	0.0198499	0.113106	0.147208	0.0405383	0.10064	0.020238			-0.235845	-0.161257	-0.100174	-0.187772	0.230205	-0.28162	-0.01536				0.0201775		-0.093118		-0.0809701				-0.110681	0.174769	0.02107	0.00923722
TG-GATES	Rat	Liver	vivo	bolus	TG-RVivoLiverSingle - indomethacin.High.3hr	Indomethacin	H		3h	-0.111752	0.0770926		-0.209452	0.062543	-0.145723	-0.0639765	-0.186273	-0.0441339	0.099947	0.0185631		-0.323569	0.637928						0.0281301		0.300089	0.0830801	-0.15993	0.135801				-0.392265		0.00208236		-0.365332					0.119423	0.0247542	-0.0121266
TG-GATES	Rat	Kidney	vivo	bolus	TG-RVivoKidneySingle - phenylbutazone.High.3hr	Phenylbutazone	H		3h	0.183944	0.0771243	0.18836	0.170082	-0.0271814	0.0435132	0.0121872	-0.0376843	-0.0272752	-0.00173818	0.0557884	0.159846	-0.0765255	-0.0108149		-0.0430965			-0.0356157	0.0173956	0.0937909	0.065306	-0.146281	-0.0453198	0.112386				-1.11634		-0.0911241		0.0834676				0.0590593	-0.190501	0.0251393	0.209564
TG-GATES	Rat	Kidney	vivo	repeat	TG-RVivoKidneyRepeat - phenylbutazone.High.29day	Phenylbutazone	H		29d	0.172495	0.0773072	0.23171	0.435959	-0.27852	0.296131	-0.0648876	-0.110508	0.10242	-0.326415	-0.179224	-0.209748	-0.0953709	0.261452		-0.159996			0.14154	0.216634	0.0628123	-0.238407	0.043803	0.491771	-0.0737901				-0.434566		0.0231615		0.0114091				0.0137938	0.0258167	0.0885567	0.155201
TG-GATES	Rat	Liver	vitro	bolus	TG-Rvitro PRH - cyclophosphamide.Middle.2hr	Cyclophosphamide	M		2h	0.0305646	0.077323		0.0322779	0.186212	-0.0432628	0.00823317	-0.0295768	0.0483141	-0.00717812	-0.0194739	0.105857	-0.07609	0.147125	-0.0287688	0.204099			-0.0531407	0.0589848	0.0312788	-0.114832	-0.0455597	0.109951	0.059971				0.0291109		0.114675		0.0518318				0.0709526	-0.00715149	-0.0546835	0.00702385
TG-GATES	Rat	Liver	vivo	repeat	TG-RVivoLiverRepeat - flutamide.Middle.8day	Flutamide	M		8d	0.155466	0.0773539		0.364354	2.04387	0.0957384	-0.0748666	0.163839	0.20021	-0.0753656	-0.209328		-0.0614339	-0.180983						0.0792196		0.0126269	-0.097274	0.354335	-0.204982				-0.638053		-0.827651		1.65971					0.0705582	-0.274341	-0.0602187
TG-GATES	Rat	Kidney	vivo	bolus	TG-RVivoKidneySingle - omeprazole.Low.3hr	Omeprazole	L		3h	-0.00337285	0.0773881	-0.148791	0.301788	-0.00425992	0.0763955	-0.349281	0.048247	-0.0714204	0.0584703	0.00287831	0.295959	0.162034	-0.369117		0.0874574			0.00204198	0.0710422	0.0452823	-0.00659819	0.172718	-0.135368	0.17154				0.738352		0.017159		0.0183998				-0.0732778	0.0408092	0.0165049	-0.173152
TG-GATES	Rat	Liver	vivo	repeat	TG-RVivoLiverRepeat - chlormadinone.Low.15day	Chlormadinone	L		15d	0.204571	0.0773935		0.248205	-0.00844769	0.657535	-0.253734	-0.578159	0.126463	0.38036	0.0241321		-0.0655175	0.331329						0.103597		0.0135514	-0.0179852	0.214419	-0.169709				0.189963		0.0465661		-0.458923					-0.00997173	0.475455	-0.0638273
TG-GATES	Rat	Liver	vivo	bolus	TG-RVivoLiverSingle - caffeine.Middle.9hr	Caffeine	M		9h	0.210926	0.0774131		0.0795954	0.0847056	0.357083	0.15972	0.0251442	-0.00159573	-0.0384853	0.0124627		-0.131998	0.0377854						0.13935		0.323121	-0.0401354	0.0644701	0.213705				0.714176		-0.281505		-0.581433					-0.0290094	-0.525998	0.00450174
TG-GATES	Rat	Liver	vitro	bolus	TG-Rvitro PRH - allopurinol.Middle.2hr	Allopurinol	M		2h	-0.00825832	0.0774189		0.00644978	-0.0515773	0.0966387	-0.167416	0.0277663	0.00526751	0.069881	-0.0178488	-0.0813777	-0.0248193	0.14995	0.0765729	0.116068			0.0755368	-0.107396	-0.0140346	0.0251718	0.0506089	0.0110484	-0.00775317				0.228727		-0.177103		0.102793				-0.00567236	0.0289289	0.131339	0.0280786
TG-GATES	Human	Liver	vitro	bolus	TG-HVitro PHH - butylated hydroxyanisole.Low.24hr	Butylated hydroxyanisole	L		24h	0.0273603	0.0774594	0.0999843	0.181351	0.00954094	0.129243	0.14541	0.113984	0.142577	0.0302805	-0.0685457	-0.0637664		0.0148771	-0.230976	-0.03175	0.0121569	0.0250939	-0.000219859	0.060931	0.260031	-0.168868	-0.140016	0.125411		0.000945526	-0.228173	0.319911	0.116905	0.0498541	0.0555033	0.0238745	0.011705	0.00428211	-0.0241901	0.0482782	-0.051929	0.0142016		0.00901039
TG-GATES	Rat	Liver	vitro	bolus	TG-Rvitro PRH - ethionamide.High.2hr	Ethionamide	H		2h	0.0175331	0.0774938		-0.0721154	-0.00989607	0.313963	0.137982	0.0974738	0.133106	-0.299256	0.109399	0.0273208	0.0684571	-0.083516	0.0192432	-0.117694			-0.0422271	-0.0629549	-0.027425	-0.0538731	-0.103427	0.433738	-0.0661598				-0.14519		-0.224389		-0.0327092				0.0288749	-0.0474431	0.0566152	-0.0283976
TG-GATES	Rat	Kidney	vivo	repeat	TG-RVivoKidneyRepeat - caffeine.Low.15day	Caffeine	L		15d	-0.104742	0.0776483	-0.304367	0.0455137	0.0930569	0.0400398	0.141192	-0.152799	-0.0301446	0.0528282	-0.0782019	0.298289	-0.0112666	0.109762		-0.0226525			-0.0730426	-0.0981162	0.00246299	0.0267874	0.15994	-0.135996	-0.0928709				0.556288		0.111295		0.0354175				-0.0304475	0.170779	0.0787171	0.00378499
TG-GATES	Rat	Liver	vivo	repeat	TG-RVivoLiverRepeat - fluphenazine.Middle.29day	Fluphenazine	M		29d	-0.064117	0.0777864		0.173435	0.139079	-0.0568644	0.069665	-0.0026876	-0.0110338	-0.151677	-0.0397999		-0.230774	-0.104802						-0.144304		0.150921	0.124663	0.150453	0.0371203				-0.0739674		-0.175674		1.03153					0.165319	-0.0999656	-0.026132
TG-GATES	Rat	Liver	vivo	bolus	TG-RVivoLiverSingle - fluphenazine.Middle.3hr	Fluphenazine	M		3h	-0.235419	0.0778128		-0.26444	-0.383488	-0.317757	0.0765787	0.18153	0.0582149	-0.114741	0.0785278		-0.0968313	-0.0436877						0.101068		0.454851	0.0852893	-0.0713711	-0.0525011				0.483827		0.476028		-0.513042					0.0693126	-0.323936	-0.021808
TG-GATES	Rat	Kidney	vivo	repeat	TG-RVivoKidneyRepeat - monocrotaline.Low.29day	Monocrotaline	L		29d	0.043696	0.0778652	0.180936	0.162131	-0.311851	0.0980434	0.079227	-0.0265113	-0.0449719	0.0197428	-0.0410359	0.179818	-0.0902823	-0.606064		-0.126296			0.0611645	0.00111779	0.0708601	-0.245328	-0.0527161	0.271674	0.0543593				0.399462		0.00535929		0.0138764				0.0451591	-0.0600123	0.013571	-0.00837931
TG-GATES	Rat	Liver	vivo	bolus	TG-RVivoLiverSingle - omeprazole.High.9hr	Omeprazole	H		9h	0.488093	0.0780901		0.663586	1.77012	1.80897	0.109858	-0.401843	0.73167	-0.121034	-0.480752		-0.16453	-0.220563						-0.00535287		1.02677	0.422454	0.0656413	0.0248296				-0.301454		-0.325461		0.886403					0.129638	-0.804427	-0.0150234
TG-GATES	Human	Liver	vitro	bolus	TG-HVitro PHH - buspirone.High.24hr	Buspirone	H		24h	0.306411	0.0781593	-0.00103485	0.530001	0.100301	-0.0349692	-0.157754	0.336668	0.282548	-0.065599	-0.330003	0.145574		-0.248672	-0.000504445	-0.00288774	0.150817	-0.0411509	0.12575	0.208954	0.0569067	-0.0835279	0.274176	0.141741		-0.0432135	0.63624	-0.590792	0.102484	0.0417607	-0.0227	-0.281319	-0.507369	0.0645191	0.0646317	0.0506958	0.137254	-0.0537993		0.0999648
TG-GATES	Rat	Liver	vivo	repeat	TG-RVivoLiverRepeat - tolbutamide.Low.15day	Tolbutamide	L		15d	0.0648822	0.0782155		-0.10075	0.0992315	-0.132128	0.153341	-0.171543	-0.117042	-0.259845	-0.0998708		-0.12532	0.230751						0.0408435		0.0019758	0.0999822	-0.153594	0.0176716				-0.938099		0.240858		-0.469159					0.152361	-0.367909	-0.0175884
TG-GATES	Rat	Liver	vivo	bolus	TG-RVivoLiverSingle - haloperidol.Middle.24hr	Haloperidol	M		24h	-0.020588	0.0782357		-0.729575	0.302279	0.262036	0.12772	-0.102942	-0.0552526	0.186462	-0.0331579		0.0113138	-0.212071						0.00539635		-0.141696	0.16989	0.65241	0.0821931				0.186097		-0.0228966		0.323506					0.166328	-0.0973885	-0.0098342
TG-GATES	Rat	Liver	vivo	bolus	TG-RVivoLiverSingle - hexachlorobenzene.Middle.24hr	Hexachlorobenzene	M		24h	-0.185481	0.0782442		0.28411	0.254449	-0.0445955	-0.143644	-0.165994	0.263537	0.610092	-0.0638634		-0.261091	0.40862						-0.133213		0.362366	-0.0454445	-0.0124218	0.073223				-0.409684		0.128768		-0.162785					0.110313	0.145382	-0.0402523
TG-GATES	Rat	Liver	vitro	bolus	TG-Rvitro PRH - hydroxyzine.Low.24hr	Hydroxyzine	L		24h	-0.0175934	0.0782701		0.0179034	0.01361	-0.0626964	-0.0389946	-0.0961209	0.0501824	0.116306	-0.000309139	-0.147102	0.0315471	-0.0602903	-0.0512669	0.0485591			0.0684511	-0.0417412	-0.0245422	-0.158607	0.179831	-0.067289	0.0187418				-0.180112		-0.162819		-0.305139				-0.0048765	-0.0220834	-0.0424625	0.00221273
TG-GATES	Human	Liver	vitro	bolus	TG-HVitro PHH - lornoxicam.High.24hr	Lornoxicam	H		24h	-0.0167572	0.0782871	0.0594071	0.0828025	-0.0354736	-0.0947844	-0.0730546	0.0890806	-0.0833322	0.0534201	-0.022068	-0.0206029		0.101035	0.0490226	-0.0551597	-0.12446	-0.0196641	-0.0297791	-0.0753111	0.0995342	-0.101385	-0.166311	0.126023		0.0146837	0.115857	0.0982547	-0.0308213	-0.00973951	-0.0369895	0.075933	-0.0146749	0.163228	-0.00591613	0.0412848	-0.0435189	-0.00416904		0.0171195
TG-GATES	Rat	Liver	vivo	repeat	TG-RVivoLiverRepeat - allopurinol.Low.15day	Allopurinol	L		15d	-0.121889	0.0783072		-0.438053	-0.113192	-0.292255	0.150273	-0.20816	0.0603953	0.0589801	-0.18017		0.109202	0.45701						0.0224954		0.705645	0.0184284	-0.115763	0.0952458				0.00469707		0.0898494		0.77843					0.0198396	0.0169405	-0.00387714
TG-GATES	Rat	Kidney	vivo	bolus	TG-RVivoKidneySingle - bromoethylamine.High.3hr	Bromoethylamine	H		3h	-0.0701624	0.0783266	-0.124684	0.418227	-0.192831	0.251918	-0.543803	0.158254	-0.00998059	-0.400446	0.0494817	-0.10751	0.0733172	-0.213092		0.0403422			0.0989244	0.00127046	0.40291	-0.255246	-0.0119403	-0.059549	-0.0944148				-0.448298		-0.155974		-0.00501839				-0.0784636	-0.0151773	-0.0473101	-0.214449
TG-GATES	Human	Liver	vitro	bolus	TG-HVitro PHH - amiodarone.Middle.8hr	Amiodarone	M		8h	0.0373359	0.0783856	0.103013	0.0404216	0.135076	-0.0605761	0.106996	0.011452	0.0758485	0.0414341	-0.0280191	-0.171912		0.171735	0.0733568	-0.115853	0.0507752	-0.0427615	-0.145709	0.0441987	-0.0275977	-0.111144	-0.258462	0.0730634		0.0320066	-0.0114507	0.0908677	0.0203136	0.0729739	0.0171999	0.0330779	0.0212429	-0.137655	-0.0834497	0.064454	0.0916114	0.0259039		0.0136277
TG-GATES	Rat	Liver	vivo	repeat	TG-RVivoLiverRepeat - nicotinic acid.Low.4day	Nicotinic acid	L		4d	0.0916804	0.0784282		0.117047	0.108908	0.209234	0.0339489	-0.413147	0.00665388	-0.00340531	-0.0170909		-0.0958966	-0.00353943						0.0196904		0.186996	0.0626303	-0.0476632	0.0930895				0.0858789		-0.0978081		-0.194181					0.0326159	0.163042	-0.0243962
TG-GATES	Rat	Liver	vivo	bolus	TG-RVivoLiverSingle - disopyramide.Low.3hr	Disopyramide	L		3h	-0.0384761	0.0784456		0.287408	0.0745789	-0.0269219	0.265949	0.299067	-0.037512	0.246125	0.0974511		-0.0342057	-0.181222						-0.0364797		0.483688	0.00255199	-0.110852	-0.0082917				0.457436		-0.122326		0.339399					-0.0554677	0.13893	0.0272955
carcinoGENOMICS	Rat	Kidney	vitro	bolus	CX RVitro NRK DCVC 24h (3uM)	DCVC	IC10	3	24h	0.032333	0.0784459	-0.0119189	-0.00942548	0.014369	0.0735825	-0.0329947	0.0499359	0.0308135	0.0188713		-0.00858218	-0.00185895	-0.00682465	0.00131724			0.0156334		0.0296835		-0.00912977	-0.00324114	0.0225208	-0.025076	0.00338058		-0.00746058	-0.00549813		-0.00756529	0.0293281	-0.00599774	-0.0063168		0.0105601	-0.0107483	0.0407816	0.00918721	-0.00873276
TG-GATES	Rat	Liver	vivo	bolus	TG-RVivoLiverSingle - theophylline.Low.3hr	Theophylline	L		3h	-0.0669232	0.0785452		-0.151785	-0.0941844	-0.465622	0.190322	0.136536	-0.154166	-0.176622	-0.0472729		-0.22313	0.200777						-0.0356771		0.607131	0.232296	-0.00954546	0.0272008				-0.0810907		0.105671		-0.113413					0.108974	0.136107	0.00457442
TG-GATES	Rat	Liver	vivo	repeat	TG-RVivoLiverRepeat - carbamazepine.Middle.29day	Carbamazepine	M		29d	0.066553	0.0787275		0.435733	1.39663	0.0754907	0.109573	0.181987	0.167673	0.0595926	-0.0614383		-0.00785826	0.321454						0.0797971		-0.150271	0.0714963	-0.184019	-0.192272				-0.320462		-0.134396		1.84373					-0.128543	-0.034071	0.00685478
TG-GATES	Rat	Liver	vivo	bolus	TG-RVivoLiverSingle - nitrofurazone.Low.6hr	Nitrofurazone	L		6h	0.124548	0.0787679		0.244317	1.84197	1.31562	-0.0740168	-0.0285096	0.179859	0.113168	-0.00779795		0.164838	-0.0733648						-0.0275707		0.535726	0.0591704	0.0715227	-0.00641489				-0.0316723		0.0283119		0.670388					0.0597535	-0.325813	-0.00902145
TG-GATES	Rat	Liver	vivo	bolus	TG-RVivoLiverSingle - pemoline.Middle.24hr	Pemoline	M		24h	0.230094	0.0788039		0.178637	0.0691077	0.171653	-0.174561	-0.306322	0.128951	0.211885	-0.0175051		0.225705	-0.198508						0.0751429		0.0969287	0.00118307	0.136491	0.0413513				0.846942		-0.307189		0.240188					0.114062	0.340823	0.0292384
TG-GATES	Human	Liver	vitro	bolus	TG-HVitro PHH - quinidine.Middle.24hr	Quinidine	M		24h	0.153196	0.0788289	0.0591061	0.0789031	0.183165	0.0945924	0.138405	0.255386	0.216872	-0.152011	-0.0695681	0.0386623		0.241908	0.147274	0.0485023	0.0393525	-0.0795437	-0.0575373	0.0172775	-0.0243538	-0.232062	-0.0503972	0.164829		-0.278705	0.106782	-0.325802	0.01012	-0.0538593	-0.227244	0.081986	-0.0966119	0.0942307	0.00639695	0.0454904	0.00158705	0.113217		0.0641061
TG-GATES	Rat	Liver	vivo	repeat	TG-RVivoLiverRepeat - vitamin A.Middle.4day	Vitamin A	M		4d	-0.0863861	0.0788412		-0.197033	0.0959536	0.0592609	0.0656725	0.0725216	-0.0137117	0.360186	0.196296		0.162407	-0.383875						0.0111593		0.348175	0.0885423	0.178035	0.00671767				0.0606245		-0.133409		-0.0389512					-0.0828664	0.289043	-0.0391897
TG-GATES	Rat	Liver	vivo	bolus	TG-RVivoLiverSingle - terbinafine.High.3hr	Terbinafine	H		3h	-0.00333164	0.0789625		0.146466	0.0554475	-0.148582	0.174299	0.255103	-0.0180993	-0.0461598	-0.0220995		0.322011	-0.541375						-0.139253		0.360611	0.0287107	-0.232303	0.0533419				-2.16283		-0.489409		0.0554752					-0.05027	-0.0442865	0.014842
TG-GATES	Rat	Liver	vivo	bolus	TG-RVivoLiverSingle - iproniazid.Low.6hr	Iproniazid	L		6h	-0.050744	0.0790619		0.120708	-0.0186022	0.0370142	-0.0996938	0.106362	-0.00566492	0.0654771	0.0531812		0.0092379	0.1677						0.112202		0.254146	-0.125408	0.141103	-0.051485				0.458178		-0.213026		0.164142					-0.0434381	0.191753	-0.0169142
TG-GATES	Rat	Liver	vivo	bolus	TG-RVivoLiverSingle - penicillamine.Low.9hr	Penicillamine	L		9h	0.000310396	0.0790853		0.201638	0.167942	0.424432	0.0608396	-0.317087	0.103422	-0.409286	-0.186512		0.192594	-0.0709247						0.195196		0.601041	0.00331679	-0.250318	-0.0578098				-0.514806		-0.545316		0.0627602					-0.110749	0.483498	0.000541787
TG-GATES	Rat	Liver	vivo	bolus	TG-RVivoLiverSingle - meloxicam.High.9hr	Meloxicam	H		9h	0.0324783	0.0791691		-0.0240952	0.573881	0.154708	0.0322605	0.19136	0.0311235	-0.592299	0.0550083		0.299445	-0.0831703						0.0705116		0.189423	0.325985	-0.0313761	0.194384				-0.680792		-0.229865		0.751654					0.120641	0.449585	0.0216189
TG-GATES	Rat	Liver	vitro	bolus	TG-Rvitro PRH - tetracycline.Low.2hr	Tetracycline	L		2h	0.0308724	0.0792132		-0.0127982	-0.0764335	-0.124479	0.0912314	-0.0688864	0.0661282	0.141337	0.177702	0.201745	-0.180492	0.180839	0.084279	0.464436			-0.0702795	-0.119203	-0.0785809	0.05973	0.239278	-0.187898	-0.0411572				0.142898		0.408205		0.0486152				0.132054	0.201468	0.0023312	-0.0124981
TG-GATES	Rat	Liver	vitro	bolus	TG-Rvitro PRH - haloperidol.Low.2hr	Haloperidol	L		2h	0.0348021	0.079237		0.135021	0.0125971	0.207655	0.0615389	-0.0364528	0.0138442	0.164529	-0.0419866	0.0429029	0.00334875	-0.2838	-0.0582758	0.00477829			-0.0764723	0.00807579	0.133123	-0.0506703	0.0477717	0.088506	0.0923625				0.0484589		-0.152918		0.0119104				0.0437907	-0.11183	-0.111666	-0.0317361
TG-GATES	Rat	Liver	vivo	repeat	TG-RVivoLiverRepeat - bromoethylamine.Low.4day	Bromoethylamine	L		4d	-0.108752	0.0792514		-0.136238	0.220907	-0.236792	-0.0883104	0.383432	0.0497734	0.104395	-0.00300266		0.310687	-0.768291						0.00930046		0.0742937	-0.00527714	0.291998	-0.133529				0.409992		0.135698		1.39907					-0.0843833	-0.250622	-0.0416929
TG-GATES	Rat	Liver	vitro	bolus	TG-Rvitro PRH - isoniazid.Middle.2hr	Isoniazid	M		2h	0.0267561	0.079361		0.309676	0.0866451	0.364065	-0.0637645	0.192451	0.0509412	0.16236	0.175987	-0.0338196	0.192811	0.158039	-0.0902173	0.0824738			-0.025668	-0.0151387	0.144545	0.286762	-0.00623314	0.27293	0.138088				0.175269		0.0788215		0.470139				-0.034745	-0.00425335	0.313321	0.053956
TG-GATES	Rat	Liver	vivo	bolus	TG-RVivoLiverSingle - propylthiouracil.Low.24hr	Propylthiouracil	L		24h	-0.0163518	0.0795326		-0.30104	1.20278	0.323608	0.0610413	0.210578	-0.0842559	-0.0454367	0.0527981		-0.0194805	0.166013						0.11762		-0.160608	-0.0659875	-0.0483148	0.00809907				-0.285791		0.102165		1.01039					0.145625	0.142996	-0.0364449
TG-GATES	Rat	Liver	vivo	repeat	TG-RVivoLiverRepeat - rifampicin.Middle.15day	Rifampicin	M		15d	0.00328089	0.0798533		0.0531243	-0.123594	0.0434083	0.0436673	0.0758836	0.115226	0.0483832	0.112432		0.0615842	-0.1185						-0.0168077		-0.573471	-0.161939	0.0625431	0.00368223				1.02708		-0.0503594		0.939681					-0.0765949	0.450519	-0.0328891
TG-GATES	Rat	Liver	vivo	repeat	TG-RVivoLiverRepeat - nicotinic acid.Middle.4day	Nicotinic acid	M		4d	0.00155356	0.0799831		-0.0837835	-0.0671071	-0.239481	-0.0796322	0.124966	-0.0250267	-0.187415	-0.102316		0.099746	-0.50374						0.0371524		0.692044	0.0302239	-0.150761	0.140669				-0.180441		0.12003		-0.396834					0.0768142	0.198337	-0.00885332
TG-GATES	Human	Liver	vitro	bolus	TG-HVitro PHH - methimazole.High.24hr	Methimazole	H		24h	-0.0756907	0.0800913	0.271266	0.276398	0.0110023	0.0452189	0.0707498	0.0796626	0.282315	0.135128	0.224871	0.345728		-0.649178	-0.134693	0.0227486	0.0898091	0.246601	0.20825	0.365048	0.168683	1.00375	0.0365458	-0.113205		-0.143041	-0.0795103	-1.80773	0.203611	-0.0775761	-0.0183928	-0.0708663	-0.808935	0.170034	-0.136591	0.419814	0.206991	-0.0894278		-0.0174149
TG-GATES	Rat	Liver	vivo	bolus	TG-RVivoLiverSingle - enalapril.Low.9hr	Enalapril	L		9h	-0.11545	0.0801197		-0.162886	-0.1316	-0.368872	-0.100983	-0.0783415	0.0227316	-0.355228	-0.0163215		-0.0298314	0.112879						-0.197473		-0.461194	0.0390733	-0.0398641	-0.20709				-0.500367		-0.323785		-0.0247031					-0.00403097	0.372469	-0.005671
TG-GATES	Rat	Liver	vivo	repeat	TG-RVivoLiverRepeat - imipramine.Middle.15day	Imipramine	M		15d	-0.0233712	0.0802781		0.154623	0.971582	0.483578	0.0672629	-0.245377	0.10501	-0.426219	0.0532708		0.15231	-0.0377302						0.0326011		0.724117	-0.00913251	-0.0496699	0.0938612				-0.780237		-0.229942		1.73047					-0.0944708	-0.257137	0.0126735
TG-GATES	Rat	Liver	vivo	repeat	TG-RVivoLiverRepeat - flutamide.Middle.29day	Flutamide	M		29d	0.0281566	0.0804078		0.177771	2.22325	0.0792901	-0.0446199	-0.281401	0.169831	0.148953	-1.1316e-05		-0.178006	-0.345561						-0.0939033		0.120228	-0.00339674	0.434195	-0.0129445				-0.846923		-0.30302		1.08962					-0.000440813	-0.103141	-0.0156239
TG-GATES	Rat	Liver	vivo	bolus	TG-RVivoLiverSingle - carboplatin.Low.6hr	Carboplatin	L		6h	-0.0318593	0.0804228		0.1037	0.0749629	-0.00590933	-0.0652087	0.828725	0.0299537	0.0714573	0.133962		0.41275	0.3632						-0.0688563		0.203061	0.167482	0.261757	0.0338642				-0.075655		-0.0649276		0.320005					0.0207662	-0.12703	-0.0188418
TG-GATES	Rat	Liver	vivo	bolus	TG-RVivoLiverSingle - lomustine.Low.9hr	Lomustine	L		9h	-0.10386	0.0805512		0.157233	0.116243	0.0371871	-0.102993	0.0374065	0.115672	0.065225	0.0783315		0.0799091	-0.0337312						-0.116827		-0.00314981	0.0726847	0.303178	-0.0207778				-1.53783		0.362914		-0.165741					-0.03314	0.00136335	-0.0133382
TG-GATES	Rat	Liver	vivo	repeat	TG-RVivoLiverRepeat - clofibrate.High.29day	Clofibrate	H		29d	-0.395239	0.0805629		-0.513222	0.150389	-0.0382087	-0.17296	1.38545	0.686741	0.904549	-0.369439		2.13202	-0.401073						0.0797271		-0.123836	-0.155356	0.129479	-0.196436				-1.15323		-0.628138		3.28821					-0.0793173	-0.40327	-0.168643
TG-GATES	Rat	Liver	vivo	bolus	TG-RVivoLiverSingle - ethanol.Low.24hr	Ethanol	L		24h	-0.00347503	0.0806302		-0.224649	0.154382	-0.0905268	-0.064285	-0.232432	-0.0247846	-0.242478	-0.0928739		-0.0418966	0.561667						0.0733229		-0.0241745	0.14829	0.190701	0.174306				-0.0564573		-0.113544		0.148585					0.11919	0.0227471	-0.0366057
TG-GATES	Rat	Liver	vivo	bolus	TG-RVivoLiverSingle - imatinib, methanesulfonate salt.Low.6hr	Imatinib	L		6h	-0.0536252	0.0807245		-0.0177152	-0.138605	0.458684	0.0966948	0.357519	-0.0111837	0.272627	-0.068354		-0.146755	-0.230237						0.0882518		0.570653	0.178041	-0.135408	-0.26363				1.23092		-0.0752919		-0.0712985					0.00156749	0.0209258	-0.016757
TG-GATES	Rat	Liver	vitro	bolus	TG-Rvitro PRH - metformin.Low.24hr	Metformin	L		24h	0.0324894	0.080729		0.092895	0.138001	0.0601595	-0.010087	0.139117	0.0539503	0.158454	0.0798926	0.0342844	-0.0402507	-0.147357	-0.116414	0.06552			-0.0105228	0.0130259	-0.0203375	0.07337	-0.0398961	0.148523	0.0109791				0.105711		-0.118593		-0.0648906				0.00235496	0.0164177	0.0993819	-0.00397262
TG-GATES	Rat	Liver	vitro	bolus	TG-Rvitro PRH - carbon tetrachloride.Low.24hr	Carbon tetrachloride	L		24h	-0.0399214	0.0807315		0.150189	0.454117	0.397912	0.0709821	0.152838	0.0127239	0.074357	-0.0277491	-0.0746436	0.350993	-0.169435	-0.114946	-0.0303901			-0.0200589	-0.0171935	0.00601435	0.194155	0.0886039	-0.00633192	0.105268				0.127168		0.00647319		0.0612959				-0.144945	-0.276354	0.088039	-0.0607847
TG-GATES	Rat	Liver	vivo	repeat	TG-RVivoLiverRepeat - carbon tetrachloride.Middle.15day	Carbon tetrachloride	M		15d	-0.104058	0.0807887		0.306507	0.816061	0.47178	0.0831906	0.0748421	0.13484	-0.0333931	-0.0210218		1.22497	0.592131						-0.130164		-0.398682	-0.131237	-0.361979	0.0565855				-1.27273		-0.566575		1.67873					0.00608901	0.601493	-0.0648513
TG-GATES	Rat	Liver	vitro	bolus	TG-Rvitro PRH - carbon tetrachloride.Low.8hr	Carbon tetrachloride	L		8h	0.0474362	0.0808873		-0.0176451	-0.12324	-0.176215	0.244126	-0.00862776	0.0165726	0.0237002	-0.0934885	0.0306163	0.0578507	-0.210845	0.00174332	0.0220282			-0.220306	0.0864602	0.0472754	-0.0242489	0.0964953	0.111311	-0.143495				-0.0900071		0.132294		-0.321363				0.0770905	0.061844	-0.0821227	-0.0219608
TG-GATES	Rat	Liver	vivo	repeat	TG-RVivoLiverRepeat - tetracycline.Middle.15day	Tetracycline	M		15d	0.0879168	0.0809143		0.230919	0.175364	0.114761	-0.0235782	0.0665929	0.0340002	0.181576	-0.0417707		-0.0182548	0.218633						0.144649		-0.0750724	0.0436474	-0.125607	0.28179				-0.212835		0.235192		0.355758					0.168952	0.0594421	-0.00543821
TG-GATES	Rat	Liver	vivo	bolus	TG-RVivoLiverSingle - simvastatin.Middle.9hr	Simvastatin	M		9h	0.274506	0.0809189		-0.175315	0.0525003	0.149851	-0.132313	-0.0384989	0.0806478	-0.283426	-0.0273983		0.809132	0.0923595						-0.135611		-0.0504542	-0.0819914	0.145137	0.0313712				-0.00902072		-0.208701		0.274741					-0.075592	0.207038	0.00377468
TG-GATES	Rat	Liver	vivo	bolus	TG-RVivoLiverSingle - terbinafine.Middle.9hr	Terbinafine	M		9h	0.0646164	0.0809231		-0.135677	0.279477	0.225822	-0.0304756	-0.121482	0.198125	-0.0953407	-0.199081		0.575315	-0.41613						0.024878		-0.343981	-0.0749692	0.236728	0.00344041				-1.1475		-0.30641		0.428204					-0.0390855	0.185677	-0.000988808
PREDICT-IV	Human	Kidney	vitro	repeat	HVitroPIV RPTEC - ZOLACD-HYPO_HD3_LFC	Zoladronate - hypoxia	H		3d	-0.0552736	0.0809416	-0.0983752	0.0278732	-0.260325	-0.0349874	-0.021315	0.0949076	0.0478742	-0.217033	0.195333	-0.056575	-0.137771	0.137394	-0.078793	0.0141457	-0.164719	0.055977	-0.0587589	0.0183866	0.0799081	0.0136944	0.0392347	0.0410681	-0.194813	-0.0517874	0.218224	0.0792081	0.115019	-0.243411	0.178715	-0.293206	0.329068	0.705155	0.0995743	-0.0928587	-0.173792	-0.0284753	0.0203841	-0.0564936
TG-GATES	Rat	Liver	vivo	repeat	TG-RVivoLiverRepeat - doxorubicin.Low.4day	Doxorubicin	L		4d	-0.060801	0.0809569		-0.231998	-0.0689826	-0.226865	-0.105601	-0.121244	-0.00289148	0.170235	-0.141978		0.0276385	0.707621						0.0450134		0.358799	-0.024547	-0.0853781	-0.0712485				1.25277		0.0529238		-0.159398					0.110606	-0.0855323	-0.0678345
TG-GATES	Rat	Kidney	vivo	bolus	TG-RVivoKidneySingle - phenacetin.High.9hr	Phenacetin	H		9h	-0.0988322	0.0809693	-0.111031	0.491501	0.0416887	0.285799	0.219817	0.0536604	0.149756	0.236691	-0.0163929	-0.0474817	0.188737	-0.2429		-0.0114927			-0.244469	0.0773715	0.037732	-0.112698	-0.072762	-0.541878	-0.284946				-0.024693		0.188917		-0.0758585				-0.0433111	0.434149	-0.372952	0.223143
TG-GATES	Rat	Liver	vivo	repeat	TG-RVivoLiverRepeat - pemoline.Middle.15day	Pemoline	M		15d	0.158866	0.0809819		0.295113	0.250529	0.257123	-0.0624145	-0.315444	0.00143366	0.0770961	-0.197687		-0.111946	-0.0491703						0.240469		0.376487	-0.0474991	-0.300341	0.0261529				-0.482893		0.195376		0.389241					-0.089542	-0.137524	0.0215033
carcinoGENOMICS	Human	Kidney	vitro	bolus	CX HVitro RPTEC 6h - NTA vs DMSO	Nitrilotriacetic acid	IC10	500	6h	-0.445557	0.0810652	0.0815792	-1.55904	-0.142268	0.243833	0.166558	0.244204		-0.287525	0.239782	0.261674		1.51353	0.984634	1.01685	-0.644583	0.0583029	0.376831	-0.26065	-0.345258	-0.0032711	0.217697	-0.201902		0.08885	-0.330917	0.556429	0.341263		0.257628	-0.197944	0.102552	0.632268	1.1036	0.243056	-0.075654	-0.0535936	-0.00972748	2.39748
TG-GATES	Rat	Liver	vivo	bolus	TG-RVivoLiverSingle - doxorubicin.Middle.3hr	Doxorubicin	M		3h	-0.0737292	0.0811535		-0.015656	0.00509499	0.328344	0.0684283	0.330336	0.438965	-0.302646	0.211083		0.0176468	0.538873						0.0399378		0.705281	-0.00976224	0.016554	-0.0248707				0.720922		-0.0204659		0.631898					-0.01323	-0.507895	-0.0166582
TG-GATES	Rat	Liver	vivo	bolus	TG-RVivoLiverSingle - flutamide.Middle.3hr	Flutamide	M		3h	-0.0469271	0.0811942		0.167967	0.0652374	-0.324592	-0.172129	-0.106124	-0.0923954	-0.309751	-0.0179255		0.0718862	0.0998425						0.00685883		0.484008	-0.0250104	-0.0485908	0.0143276				-0.330293		-0.0795992		0.100357					0.0660839	0.0552801	-0.0121155
TG-GATES	Rat	Liver	vivo	repeat	TG-RVivoLiverRepeat - azathioprine.High.4day	Azathioprine	H		4d	-0.180224	0.0812225		-0.0706262	0.234817	-0.343587	0.219723	0.269955	-0.0117853	0.0282122	-0.0476198		-0.102742	0.571247						0.00454048		0.861132	-0.0732778	0.236928	0.128398				-0.301346		-0.106469		1.52439					0.260762	-0.712073	-0.0436855
TG-GATES	Human	Liver	vitro	bolus	TG-HVitro PHH - hepatocyte growth factor, human.Middle.8hr	HGF	M		8h	0.00615307	0.0812255	-0.000906465	-0.0633556	0.0326194	0.0401651	0.125856	-0.00728056	-0.0967671	0.140887	0.116647	-0.174273		0.198175	-0.0126586	-0.120355	0.0345926	0.0993446	0.144152	0.0844053	0.204379	-0.481862	-0.169853	0.0214106		-0.107278	-0.0937555	-0.159102	-0.0134428	-0.0367995	-0.231198	0.0656026	-0.347204	0.0377525	-0.052198	0.0296849	0.161957	0.16816		-0.0423648
TG-GATES	Rat	Liver	vivo	bolus	TG-RVivoLiverSingle - danazol.Low.6hr	Danazol	L		6h	0.16867	0.0812309		-0.180656	-0.147289	0.188542	-0.194207	0.0533705	0.212035	0.0605576	-0.0244552		0.265358	-0.36292						0.057245		0.787431	-0.139258	0.254505	0.210402				0.0696706		0.00631089		0.269203					-0.142016	0.401376	0.0335391
TG-GATES	Rat	Liver	vitro	bolus	TG-Rvitro PRH - gentamicin.Middle.8hr	Gentamicin	M		8h	0.125781	0.0812479		0.431118	-0.111537	0.43657	0.0697061	-0.0835869	0.232931	-0.134001	0.122493	-0.00453154	0.200156	0.255088	-0.113802	0.100009			-0.17146	0.04722	0.089039	0.566148	-0.010555	0.0491074	0.00223192				0.0707605		-0.114136		0.417486				0.414789	-0.0478652	0.0668545	0.0423898
TG-GATES	Rat	Liver	vivo	bolus	TG-RVivoLiverSingle - captopril.Low.3hr	Captopril	L		3h	-0.0519049	0.0812953		0.26736	0.100644	-0.253068	-0.171479	-0.624768	0.00277875	0.200542	-0.125504		0.311838	-0.334767						-0.238267		-0.470669	-0.0214362	0.13742	-0.0757013				0.596		0.0649349		0.0581794					0.0263995	0.207539	-0.00227153
TG-GATES	Rat	Liver	vivo	repeat	TG-RVivoLiverRepeat - phenylbutazone.Middle.15day	Phenylbutazone	M		15d	0.124352	0.0813551		0.327722	0.0862593	-0.136819	0.0711185	0.247977	0.0573826	-0.0892068	-0.127718		-0.3946	-0.287915						0.00825306		0.295938	-0.134462	-0.077877	-0.0213061				0.526605		0.277448		-0.483168					0.0680439	-0.371369	-0.0182486
TG-GATES	Rat	Liver	vitro	bolus	TG-Rvitro PRH - iproniazid.High.24hr	Iproniazid	H		24h	-0.196134	0.0813626		-0.486131	-0.241033	-0.602726	0.395103	-0.771041	0.253766	-0.00263096	0.226008	-0.0502218	0.459925	0.253939	0.243991	0.544314			-1.00672	-0.544198	-0.639383	0.354078	0.727327	-0.177758	0.131781				0.430263		-0.467642		-0.193276				0.391251	-0.180351	0.384281	0.164456
TG-GATES	Rat	Liver	vivo	bolus	TG-RVivoLiverSingle - ibuprofen.Middle.3hr	Ibuprofen	M		3h	-0.229869	0.0814446		-0.295519	0.0789424	-0.315362	-0.0366001	-0.0929028	-0.0790582	0.0170604	0.054588		1.34423	0.0309433						0.0151365		-0.574537	-0.00903639	0.287569	0.329272				-1.22184		0.0758771		0.429221					-0.106717	0.273672	0.0586142
TG-GATES	Rat	Liver	vivo	repeat	TG-RVivoLiverRepeat - chlormezanone.Low.8day	Chlormezanone	L		8d	0.118201	0.0814695		-0.0843304	0.212823	0.0393057	-0.0612776	0.192824	0.104707	-0.22757	0.0126063		-0.104249	-0.0425716						0.00106163		-0.156513	-0.0416376	0.15651	-0.0395895				0.302962		-0.0414548		1.43672					-0.00133168	0.00268275	-0.0287764
TG-GATES	Rat	Kidney	vivo	repeat	TG-RVivoKidneyRepeat - nitrofurantoin.Middle.8day	Nitrofurantoin	M		8d	0.00836513	0.0815215	0.281547	0.114373	0.00624586	0.0516009	-0.0923904	-0.107467	0.0478337	0.192024	0.0869387	0.0315952	-0.163321	-0.332235		0.166966			0.0370045	-0.0880079	-0.125343	0.16052	-0.0753808	-0.0296595	0.0526269				0.664667		-0.00603256		0.0180525				0.0682862	0.050897	0.0554777	0.152799
TG-GATES	Rat	Kidney	vivo	repeat	TG-RVivoKidneyRepeat - enalapril.Low.8day	Enalapril	L		8d	0.0323766	0.0816281	-0.0116795	0.926668	0.181108	-0.126489	0.0833563	0.131288	0.116258	0.0218187	-0.10625	0.221906	0.152513	-0.171469		-0.193503			-0.0139299	-0.209304	0.0591243	0.166138	0.0790683	-0.0118371	0.0186651				0.735293		-0.0366413		0.0580697				-0.0862099	0.14026	0.0981961	0.0990164
TG-GATES	Rat	Liver	vivo	repeat	TG-RVivoLiverRepeat - gemfibrozil.Middle.29day	Gemfibrozil	M		29d	-0.234288	0.0816779		-0.285372	1.11214	0.0999957	-0.180349	0.334339	0.424163	0.286586	-0.416097		2.5884	-0.943167						-0.142084		0.361569	-0.139928	-0.0376063	-0.00830727				-1.78573		0.0375021		3.40929					0.17492	-0.272352	-0.139102
TG-GATES	Human	Liver	vitro	bolus	TG-HVitro PHH - amiodarone.Middle.2hr	Amiodarone	M		2h	-0.015388	0.0817067	0.0965508	-0.0776885	-0.0353499	0.105985	-0.0235846	-0.00589626	0.0277775	-0.155165	0.0293038	0.0454862		-0.14329	0.00994883	-0.0121506	0.0884809	-0.0203464	-0.0696485	0.00800285	0.0185766	-0.0218267	-0.0858396	0.00713379		0.0769386	-0.0988736	0.0370323	0.0133741	-0.0154925	0.0541183	0.0234359	0.0659261	-0.129876	-0.0517684	0.0481391	-0.0113088	0.0010483		-0.0341986
TG-GATES	Rat	Liver	vivo	bolus	TG-RVivoLiverSingle - moxisylyte.Low.3hr	Moxisylyte	L		3h	-0.101739	0.0817651		-0.313118	-0.149008	0.095228	-0.0720439	0.0463178	-0.134616	0.183573	0.0995598		0.0727007	0.15179						0.0199072		0.352974	-0.0421237	0.126018	0.113808				1.19265		0.0681018		-0.626771					0.0419561	-0.269087	-0.00879381
TG-GATES	Rat	Liver	vitro	bolus	TG-Rvitro PRH - hydroxyzine.High.24hr	Hydroxyzine	H		24h	0.552123	0.0817723		-0.664312	0.498901	0.107762	-0.433701	-1.01933	0.115577	0.928636	-0.163296	0.903966	0.645714	0.0784062	-0.119584	-0.0774688			-0.377995	0.331988	0.510318	0.165628	0.153315	0.329919	-0.101183				-0.0601685		-1.80188		-3.8604				-0.0920362	0.104933	-0.156052	0.095476
TG-GATES	Rat	Liver	vivo	repeat	TG-RVivoLiverRepeat - chlorpheniramine.Middle.4day	Chlorpheniramine	M		4d	0.0957006	0.0818418		-0.102099	0.588543	0.276805	0.17889	0.213854	-0.026126	0.0294694	-0.110944		0.0068374	0.060857						-0.0527696		0.0155199	-0.0135614	0.0183084	0.060428				0.804904		-0.0351179		0.560363					-0.0266919	0.133994	-0.00899202
TG-GATES	Rat	Liver	vivo	bolus	TG-RVivoLiverSingle - sulindac.Low.3hr	Sulindac	L		3h	0.281162	0.0819095		0.222574	0.154542	-0.00376313	-0.22878	0.0331766	0.0236926	-0.09472	-0.200558		0.175214	-0.137384						-0.123754		0.0408214	0.082865	-0.247671	-0.0275419				-1.30485		-0.463521		0.521418					0.0593795	-0.661561	0.0101685
TG-GATES	Rat	Liver	vivo	repeat	TG-RVivoLiverRepeat - clofibrate.Middle.4day	Clofibrate	M		4d	0.0173062	0.0819385		-0.10392	-0.076833	0.023299	-0.161171	-0.126526	0.268632	-0.250969	-0.173878		1.67001	-0.509204						-0.0296709		0.0142685	0.0523327	-0.0509672	-0.17174				-0.635596		0.2982		1.73835					-0.0818644	-0.0227124	-0.0571958
TG-GATES	Rat	Liver	vivo	bolus	TG-RVivoLiverSingle - cisplatin.Middle.6hr	Cisplatin	M		6h	0.138698	0.0821034		0.228052	0.18169	-0.369812	-0.0561493	-0.489621	0.000255102	0.375094	-0.0611134		-0.319967	0.43768						-0.325054		-0.0148034	-0.0251675	0.015446	-0.00875462				-0.332283		-0.117545		0.268428					0.0735691	0.408212	0.0255662
TG-GATES	Human	Liver	vitro	bolus	TG-HVitro PHH - methimazole.Middle.24hr	Methimazole	M		24h	-0.0696734	0.0821375	0.0316388	0.232985	0.00780169	0.0552578	0.00313685	-0.00136471	0.140515	0.163522	-0.0440824	0.155788		-0.1017	-0.199098	0.0117906	0.0718552	0.0685101	0.150599	0.2436	0.0801814	0.366905	-0.0580101	0.00103326		0.0655728	-0.107189	-0.163851	0.123171	0.032862	0.0863089	0.0359641	-0.0225573	0.180352	-0.0103753	0.100642	0.0327471	-0.0726613		-0.0835075
TG-GATES	Human	Liver	vitro	bolus	TG-HVitro PHH - omeprazole.High.24hr	Omeprazole	H		24h	0.783399	0.08223	0.0877632	-0.194139	-1.07702	0.0543816	-0.139217	-0.0748392	1.27293	-0.687049	-1.0386	0.845265		-1.63058	0.138306	0.00673311	0.524551	0.218146	0.845505	-0.285966	1.74279	-0.368546	-0.02519	1.08448		-0.452514	0.240452	-0.151754	0.240285	0.0824732	0.146109	-1.08973	-0.711725	0.17655	0.182993	-0.0914376	-0.283159	0.149224		0.188772
TG-GATES	Rat	Liver	vivo	bolus	TG-RVivoLiverSingle - hydroxyzine.Middle.3hr	Hydroxyzine	M		3h	0.098734	0.0823163		0.132514	0.324717	-0.215647	-0.0245025	0.291708	0.0632205	-0.0916701	0.117103		0.144451	-0.108518						-0.0898172		0.415132	0.113014	-0.054175	0.108772				-0.405862		-0.160097		0.362233					0.0113455	0.257269	-0.0173798
TG-GATES	Rat	Liver	vivo	repeat	TG-RVivoLiverRepeat - 1 cholesterol 0.25 sodium cholate.High.8day	Cholesterol sodium cholate 1to4	H		8d	0.0921492	0.0823369		0.529016	-0.0339586	-0.275104	-0.0380784	0.500223	0.214699	0.292144	0.00121771		-0.206282	0.0985512						-0.08447		0.183329	0.0687986	-0.493655	0.0114812				-1.36937		-0.387638		-0.866762					-0.0983399	-0.0755163	0.015573
TG-GATES	Rat	Kidney	vivo	bolus	TG-RVivoKidneySingle - valproic acid.Low.9hr	Valproic acid	L		9h	0.0274646	0.0823705	-0.0425988	-0.0584465	0.0280422	0.10348	0.198874	0.107741	0.0189249	-0.133365	0.069794	-0.00236251	0.114914	0.145214		-0.115667			-0.00537581	0.0332941	0.0337301	-0.00600005	0.00440641	-0.0413455	-0.104516				-0.253926		-0.0829582		-0.0219722				-0.0295541	-0.375884	0.0509	0.130328
TG-GATES	Rat	Liver	vivo	bolus	TG-RVivoLiverSingle - methimazole.Low.9hr	Methimazole	L		9h	0.169162	0.0825487		0.509834	0.580335	1.85768	-0.184618	-0.803171	0.214398	-0.273012	-0.203399		-0.120013	-0.406635						-0.0542888		0.021702	-0.0649316	-0.102561	-0.0603605				0.263648		-0.00939937		0.483491					-0.0344658	-0.0618334	-0.0142572
TG-GATES	Rat	Liver	vivo	bolus	TG-RVivoLiverSingle - tacrine.Low.3hr	Tacrine	L		3h	-0.0212852	0.0826375		0.0990819	-0.0388082	0.0373652	-0.0133521	0.115726	0.077726	-0.107394	-0.0350058		0.00163379	-0.058702						-0.117104		-0.108577	0.0969149	-0.038982	0.0200363				0.0467605		-0.0872343		0.729509					-0.0480005	-0.120734	-0.0118856
carcinoGENOMICS	Rat	Kidney	vitro	bolus	CX RVitro NRK Dicofenac sodium 24h (6uM)	Diclofenac	IC10	6	24h	0.00607721	0.0826844	-0.0194242	-0.0456368	0.0852325	0.0298369	-0.0107122	0.0596424	0.0479654	-0.00792941		-0.038567	-0.00838787	-0.0424599	0.115574			-0.03903		-0.0437428		0.196734	-0.036192	-0.014785	0.012303	0.00395091		-0.0407625	-0.0415324		-0.0366045	0.0189874	-0.0372774	-0.0488872		0.00484708	0.0167294	0.0214609	0.0185795	-0.043028
TG-GATES	Rat	Liver	vitro	bolus	TG-Rvitro PRH - amitriptyline.Low.2hr	Amitriptyline	L		2h	0.0764426	0.0826847		0.00364493	0.0160182	0.0909213	-0.203572	0.0672286	0.0811311	0.135644	0.0814508	-0.019964	0.0705743	0.0230289	0.0462731	-0.214843			0.106893	-0.0635957	0.0882923	0.000920739	-0.0380897	0.0157689	0.00302887				0.417587		0.351893		-0.234318				0.0264605	-0.00078606	-0.000121162	-0.0409281
TG-GATES	Rat	Liver	vivo	repeat	TG-RVivoLiverRepeat - caffeine.Middle.4day	Caffeine	M		4d	-0.0507749	0.082805		0.252567	0.21468	-0.300069	0.299777	-0.132027	0.0695625	0.0212203	0.196283		-0.11073	-0.101221						-0.0939342		0.123145	0.107838	-0.270662	-0.0147264				-0.323085		-0.156887		0.537245					0.124456	0.152671	0.0138973
TG-GATES	Human	Liver	vitro	bolus	TG-HVitro PHH - imipramine.Middle.8hr	Imipramine	M		8h	0.145656	0.0829805	-0.12113	0.042925	-0.0889112	-0.197522	0.0182606	-0.0342183	-0.00117382	0.0456951	-0.0884605	-0.222385		-0.101799	0.224966	0.0675969	0.229961	-0.0111817	0.0505617	-0.0766902	0.128617	-0.0685238	-0.0463108	0.132924		-0.118375	0.0618419	0.0173272	-0.0375783	0.0113406	-0.102551	0.0527013	-0.17317	0.133971	0.0674968	0.170142	-0.109977	0.101354		0.0357429
TG-GATES	Rat	Liver	vivo	bolus	TG-RVivoLiverSingle - tiopronin.Middle.9hr	Tiopronin	M		9h	-0.147248	0.0831115		-0.408256	-0.056872	-0.0750096	0.204212	0.152213	0.161717	-0.134026	-0.0458194		0.212219	0.114341						0.0597115		0.380421	0.0647066	-0.0507484	0.0567613				-0.595147		-0.0394988		0.0505884					-0.177345	-0.141435	-0.0217527
TG-GATES	Rat	Kidney	vivo	repeat	TG-RVivoKidneyRepeat - phenylbutazone.Low.29day	Phenylbutazone	L		29d	0.0218205	0.0831899	0.121962	-0.0677643	-0.202996	-0.00240927	0.0466653	0.0506345	0.00355704	-0.0930838	0.1199	-0.364059	-0.0288065	0.190448		-0.108554			-0.0297247	0.105613	0.0918664	-0.128269	-0.00462455	0.202189	0.0237681				0.0398833		-0.0513989		0.090496				-0.0442742	0.132403	0.0286465	-0.0454718
TG-GATES	Rat	Liver	vivo	bolus	TG-RVivoLiverSingle - chlorpheniramine.Low.3hr	Chlorpheniramine	L		3h	-0.00275534	0.0832557		-0.184339	0.0182307	-0.163121	-0.340315	-0.250828	0.0270167	0.259189	0.180828		-0.15036	0.166729						0.0123777		-0.0194997	-0.0778655	-0.106293	0.254094				1.04762		0.487679		-0.0750849					-0.120192	-0.0240616	-0.00546157
TG-GATES	Rat	Liver	vivo	bolus	TG-RVivoLiverSingle - buthionine sulfoximine.High.6hr	Buthionine sulfoximine	H		6h	-0.573373	0.0833345		-0.393526	0.0382041	0.0357121	0.0579805	-0.222017	-0.00225321	-0.396854	0.00084976		-0.1209	-0.134533						-0.130584		-0.329713	-0.0886933	-0.0481218	-0.253763				-0.184856		0.0208342		-0.018334					-0.017854	-0.0342091	0.06239
TG-GATES	Rat	Liver	vivo	bolus	TG-RVivoLiverSingle - valproic acid.Middle.24hr	Valproic acid	M		24h	0.0579197	0.0834131		0.212085	0.226416	0.257139	-0.0182904	-0.68874	0.00527986	-0.318455	0.0379584		0.305139	-0.447563						-0.0293787		-0.0201596	-0.0581736	0.398669	0.157182				0.167046		-0.163578		0.918593					-0.0388656	0.168703	-0.0143793
TG-GATES	Rat	Liver	vitro	bolus	TG-Rvitro PRH - cimetidine.Low.24hr	Cimetidine	L		24h	0.0197794	0.0836148		0.0359554	0.00693861	-0.124003	-0.0393094	-0.0807174	-0.0107066	0.0491059	0.0242384	-0.0530609	0.0149268	-0.0671247	0.0422291	0.0794711			-0.0143663	-0.0243717	-0.143867	-0.101315	-0.135038	-0.0462512	-0.010358				0.129135		-0.342909		-0.169062				-0.100512	-0.0697634	-0.065522	0.0197347
TG-GATES	Rat	Liver	vitro	bolus	TG-Rvitro PRH - fenofibrate.Middle.8hr	Fenofibrate	M		8h	-0.0414113	0.0836326		0.0234526	-0.0848424	-0.121891	-0.105118	0.0154225	0.0266667	0.212696	0.00598277	0.151902	0.587816	0.384095	-0.148136	0.13522			-0.0407282	-0.109278	0.0978553	-0.129028	-0.0385543	0.0724497	-0.0531978				0.502895		-0.0293497		0.305224				-0.034443	-0.0534798	0.188779	0.036053
TG-GATES	Human	Liver	vitro	bolus	TG-HVitro PHH - acetaminophen.High.2hr	Acetaminophen	H		2h	0.0237735	0.0836737	0.0603943	-0.0861633	0.0581733	0.0478933	0.188656	0.115897	0.0389558	0.0888887	0.210022	0.020211		0.0810064	0.246461	0.141926	0.144566	-0.360716	-0.025956	-0.070344	0.0241049	-0.376872	0.219138	-0.0190478		-0.0350388	-0.263596	-0.101257	0.0597996	0.00880756	-0.0227794	0.0460663	0.00995819	0.26524	0.0755915	0.0842979	-0.0473163	0.0719882		0.0178198
TG-GATES	Human	Liver	vitro	bolus	TG-HVitro PHH - benzbromarone.Middle.8hr	Benzbromarone	M		8h	-0.0900982	0.0837679	0.206168	0.0494999	0.0271709	-0.147258	0.0197154	0.0240697	0.0763832	-0.0971898	0.00901347	0.056604		0.00941824	0.0651144	-0.0744913	0.0437611	-0.156957	-0.00356973	0.0229183	0.0269881	0.0518782	-0.18428	-0.0128028		0.0945556	-0.00814463	0.0513186	0.0377148	0.0170716	0.0850999	-0.0603875	-0.107057	0.155945	-0.0477938	0.0828203	-0.0284988	0.0782693		-0.00925885
TG-GATES	Rat	Liver	vivo	repeat	TG-RVivoLiverRepeat - phalloidin.High.4day	Phalloidin	H		4d	-0.184066	0.0838081		0.541347	3.5267	0.0406138	-0.205214	-0.616851	0.143491	-0.394229	0.0425285		0.112002	-1.47404						-0.114954		0.296889	-0.0215033	0.24415	0.242185				-0.67428		-1.85924		1.43997					-0.292649	-1.45687	-0.0196067
TG-GATES	Rat	Kidney	vivo	repeat	TG-RVivoKidneyRepeat - bromobenzene.High.29day	Bromobenzene	H		29d	0.109524	0.083834	0.0373718	0.764879	0.0878137	0.416117	-0.0794259	-0.0473933	0.070648	0.274592	-0.08278	0.265377	-0.016711	-0.0669755		0.396571			-0.1559	-0.162296	-0.109024	0.0604221	0.0120143	0.284468	-0.011722				-0.204745		-0.0358654		0.231305				-0.0291906	-0.0941595	0.148171	-0.000937537
TG-GATES	Rat	Liver	vitro	bolus	TG-Rvitro PRH - flutamide.High.2hr	Flutamide	H		2h	0.00917948	0.0838944		0.119825	0.216898	-0.129659	0.0875922	0.0437523	-0.0516563	0.123168	-0.0312322	0.011365	-0.00782824	-0.126309	0.141516	-0.0964951			-0.0466589	-0.133368	-0.0320475	-0.105143	0.0261556	0.0596758	-0.0550792				-0.068024		0.323742		-0.176131				0.00969728	0.0295274	-0.0591074	-0.0488201
TG-GATES	Rat	Liver	vivo	repeat	TG-RVivoLiverRepeat - furosemide.Middle.29day	Furosemide	M		29d	-0.062093	0.0839731		0.414436	0.0338719	0.240513	0.119797	0.162986	0.0988966	0.00568076	-0.344682		-0.0412655	0.0242571						0.0288673		0.414576	-0.0197592	-0.02234	-0.00935813				0.0128918		0.110213		0.203083					-0.0783985	0.374469	-0.0505348
TG-GATES	Rat	Kidney	vivo	bolus	TG-RVivoKidneySingle - cisplatin.Middle.3hr	Cisplatin	M		3h	0.042362	0.0841012	-0.0778383	-0.0620844	0.0929539	-0.209073	0.126349	-0.0625064	-0.0928756	-0.0445747	0.0331833	-0.010877	-0.0359601	0.393846		-0.0518378			0.0349078	-0.293473	-0.0943968	-0.0405643	0.23718	0.0683924	-0.165948				-0.321218		0.00639887		-0.080807				0.0272162	0.136827	0.175787	0.276145
TG-GATES	Human	Liver	vitro	bolus	TG-HVitro PHH - hexachlorobenzene.Middle.24hr	Hexachlorobenzene	M		24h	0.0799178	0.084123	0.143722	0.106119	0.0381939	0.0344673	0.0517156	0.0593437	-0.000189835	0.0825661	-0.0800169	-0.0750582		-0.0375429	0.0460843	0.0907267	-0.0190183	-0.028724	-0.00999552	0.0334103	-0.00737924	-0.116441	0.0364476	-0.0257248		-0.119393	-0.0122458	-0.00312416	-0.0398991	-0.0654356	-0.0351294	0.0747809	0.049095	0.0370963	-0.0434462	0.0757881	0.00869552	0.188774		0.00376182
TG-GATES	Rat	Liver	vivo	repeat	TG-RVivoLiverRepeat - meloxicam.Low.8day	Meloxicam	L		8d	-0.0930808	0.0841303		-0.316611	0.0830193	-0.466203	0.0509458	-0.198582	-0.0769296	-0.173547	0.155131		-0.174906	0.337382						-0.059975		-0.437676	0.0843808	0.0443119	-0.196153				-0.714499		-0.0523845		0.119968					-0.0653764	0.178016	-0.00560193
TG-GATES	Human	Liver	vitro	bolus	TG-HVitro PHH - diazepam.High.8hr	Diazepam	H		8h	0.122418	0.0841698	-0.248199	-0.0677207	-0.0307486	-0.124149	0.142197	-0.0163029	0.108497	0.18984	0.304726	0.00669438		-0.109316	0.0720385	-0.0499227	0.114492	0.669515	0.0959575	-0.110914	-0.0466229	0.391243	0.0214455	0.00748884		-0.23209	0.0777194	-0.982312	-0.081797	-0.171332	-0.222269	-0.204559	-0.558329	-0.0162452	0.140869	0.126499	-0.153208	0.0782901		0.0592871
TG-GATES	Rat	Liver	vivo	bolus	TG-RVivoLiverSingle - benziodarone.Low.24hr	Benziodarone	L		24h	0.0774067	0.0842452		0.0574202	-0.0230422	0.26821	0.0385121	-0.00108154	0.0122282	-0.164485	0.0295082		0.60215	0.48573						-0.150154		-0.128291	0.0809816	-0.128957	-0.0765824				-0.20696		0.257186		0.387267					0.0589557	0.161513	-0.0260446
TG-GATES	Rat	Liver	vivo	bolus	TG-RVivoLiverSingle - chlorpheniramine.Middle.9hr	Chlorpheniramine	M		9h	-0.062482	0.084355		-0.0186773	-0.267655	0.128447	-0.0783452	0.215361	0.100428	-0.118413	0.125128		0.199605	0.253723						0.0347144		0.365784	-0.0328419	0.177263	-0.0351696				1.09284		-0.112261		-0.316118					-0.0766581	0.00185215	0.0239775
TG-GATES	Rat	Liver	vivo	repeat	TG-RVivoLiverRepeat - azathioprine.Low.29day	Azathioprine	L		29d	-0.0887722	0.0844535		-0.107143	0.117833	-0.0447727	0.151359	0.744067	-0.147335	-0.0846277	0.100979		-0.0056898	-1.22971						-0.0366864		0.0182178	-0.0841986	-0.0742207	0.226209				-0.145884		0.0792276		0.884281					0.0184348	-0.501455	0.0246538
TG-GATES	Rat	Liver	vitro	bolus	TG-Rvitro PRH - tiopronin.High.8hr	Tiopronin	H		8h	0.11231	0.0846452		0.0826732	0.188107	0.385531	-0.255508	0.0826955	0.0912263	-0.175918	0.213338	-0.11671	0.135347	0.474374	-0.13624	0.380664			0.336185	0.180231	0.183181	0.251104	-0.194699	0.27203	0.0925534				0.379173		0.32986		0.158235				0.0781	-0.309943	0.148022	0.0623781
TG-GATES	Rat	Liver	vivo	bolus	TG-RVivoLiverSingle - tannic acid.High.3hr	Tannic acid	H		3h	-0.0753504	0.0846525		-0.0297976	0.172913	-0.422332	-0.0914638	0.343653	0.0357922	0.0496189	-0.0199018		0.336104	-0.0799268						0.114685		0.343301	-0.0691684	-0.139944	0.141943				0.0471667		0.0220725		0.104525					0.0180566	-0.405318	-0.00313407
TG-GATES	Rat	Liver	vivo	repeat	TG-RVivoLiverRepeat - bromobenzene.Low.8day	Bromobenzene	L		8d	-0.0757487	0.0848874		-0.127479	0.149915	0.0746092	0.0927821	-0.00291118	-0.0370414	0.124803	0.0140314		0.215884	0.807936						0.0590682		0.0228395	-0.0270163	0.136415	0.0507212				-0.328778		-0.0932017		1.52803					0.0699987	0.235533	0.00728774
TG-GATES	Rat	Liver	vitro	bolus	TG-Rvitro PRH - monocrotaline.Low.2hr	Monocrotaline	L		2h	-0.0189207	0.0849087		0.0269206	-0.0212695	-0.124167	0.00668935	-0.175897	-0.084941	-0.17441	-0.00268092	0.0229862	-0.0354358	0.17069	-0.0796329	0.0522988			0.0577542	-0.0433042	-0.0734636	-0.0555828	0.0706369	-0.137964	0.0196509				0.141229		0.111496		0.0973388				-0.0170367	0.271009	0.0591359	-0.0459231
PREDICT-IV	Human	Kidney	vitro	repeat	HVitroPIV RPTEC - CIDOVR_LD14_LFC	Cidofovir	L		14d	-0.190732	0.0850932	0.0652106	-0.0912513	-0.123806	-0.559508	0.0887012	-0.0345186	-0.204932	0.101556	-0.689225	0.164244	-0.0914134	0.270958	-0.0390676	-0.120898	-0.17351	0.0293855	0.0626373	0.0441457	0.193608	-0.249737	0.113466	0.182384	0.148836	-0.439996	0.596632	0.491669	0.0956207	-0.0786373	0.0178489	0.0863537	-0.375417	0.335861	0.308357	-0.106989	-0.0738645	0.163487	0.149058	-0.0584785
TG-GATES	Rat	Liver	vivo	bolus	TG-RVivoLiverSingle - methylene dianiline.High.6hr	Methylene dianiline	H		6h	0.593682	0.0850972		0.157466	0.738112	0.0288888	-0.120716	-0.22068	0.387313	-0.370322	-0.125897		-0.263292	-0.30358						-0.293377		0.0315238	0.0203422	0.242162	0.89104				-1.73203		-0.717838		-0.317018					0.0417117	-0.0257631	-0.0315025
TG-GATES	Rat	Kidney	vivo	bolus	TG-RVivoKidneySingle - acetaminophen.High.24hr	Acetaminophen	H		24h	-0.0566084	0.0851068	-0.085646	0.696501	0.112429	0.68321	-0.160221	-0.0361736	0.124788	-0.0395167	0.047473	-0.171805	0.0685983	0.0327193		-0.0604861			-0.0998096	-0.0312931	0.297538	-0.126002	-0.208931	-0.127988	-0.213603				-0.331456		-0.105626		0.20691				-0.325709	0.030563	-0.0493394	0.174433
TG-GATES	Rat	Liver	vivo	bolus	TG-RVivoLiverSingle - omeprazole.Middle.9hr	Omeprazole	M		9h	0.421136	0.0852818		0.347566	0.852709	1.20947	0.17448	-0.889284	0.501527	-0.27067	-0.480109		0.0286881	-0.361576						-0.0639136		0.865775	0.276186	0.0501222	-0.105002				-0.0931838		-0.260484		0.555267					0.182944	-0.342801	-0.0475538
TG-GATES	Rat	Liver	vivo	bolus	TG-RVivoLiverSingle - nifedipine.Middle.6hr	Nifedipine	M		6h	-0.645877	0.0855079		-0.321212	-0.260076	-0.742638	-0.0141987	-0.400196	-0.0121292	1.02675	0.0462908		0.107739	0.391564						0.104166		0.40561	0.146039	-0.664404	0.643966				0.644232		-0.133251		-0.415408					-0.0471752	-0.472916	0.0097001
TG-GATES	Rat	Kidney	vivo	bolus	TG-RVivoKidneySingle - bucetin.Middle.24hr	Bucetin	M		24h	-0.146175	0.0855189	-0.338477	0.212695	-0.0158323	0.172331	-0.185665	-0.13144	0.0156404	-0.112393	0.0199113	0.281181	0.242106	0.0593593		-0.201855			-0.0672827	-0.0367158	0.0502265	-0.39327	0.00154412	0.0898796	0.036706				-0.678419		0.0559109		0.275695				-0.0859046	0.24968	0.133733	0.269597
TG-GATES	Rat	Liver	vivo	bolus	TG-RVivoLiverSingle - gentamicin.Middle.24hr	Gentamicin	M		24h	-0.131865	0.0856404		-0.334717	-0.105259	0.0691589	-0.186217	-0.293843	0.0750698	-0.493862	0.0129942		0.0640287	0.0645345						-0.0805688		0.143592	0.0477582	-0.0929943	0.0913771				-0.654337		-0.134133		0.156082					-0.0843174	0.0213529	-0.00532961
TG-GATES	Rat	Liver	vivo	repeat	TG-RVivoLiverRepeat - ketoconazole.Middle.4day	Ketoconazole	M		4d	-0.177556	0.0857221		-0.259936	-0.118344	-0.313143	0.172809	0.364269	0.0666169	0.0991047	0.0548785		0.00559662	0.176803						0.0852383		0.542582	0.105057	-0.267589	-0.309743				0.439343		0.216345		-0.137452					0.0525958	-0.421442	0.00310505
TG-GATES	Rat	Liver	vivo	bolus	TG-RVivoLiverSingle - omeprazole.High.6hr	Omeprazole	H		6h	0.50472	0.0857455		0.786719	1.77331	2.23924	0.0421358	-0.192175	0.666759	-0.026958	-0.121804		0.10492	-1.03591						-0.149471		1.19337	0.0257157	-0.0462993	0.2068				-0.875984		-0.528251		1.3048					0.220892	-0.316151	-0.0564519
TG-GATES	Rat	Liver	vivo	bolus	TG-RVivoLiverSingle - nitrofurantoin.Low.24hr	Nitrofurantoin	L		24h	0.00571492	0.0857846		-0.408827	0.153681	0.0796412	0.0523994	0.448003	0.114695	-0.407555	-0.013436		0.113323	0.159078						-0.0519455		0.077492	0.186009	0.0751523	0.0517963				-0.00457986		0.133194		0.293303					0.0430443	-0.11384	-0.0475914
TG-GATES	Rat	Liver	vivo	bolus	TG-RVivoLiverSingle - allopurinol.Low.6hr	Allopurinol	L		6h	-0.065394	0.0858295		0.174037	0.0431639	-0.328422	-0.055527	-0.338977	-0.0131709	0.191285	0.0426213		0.0857024	0.105391						-0.0625885		0.402663	0.0534585	-0.150654	0.000524113				0.4552		-0.0237771		0.111524					0.00935262	-0.366395	-0.00513926
TG-GATES	Rat	Liver	vivo	repeat	TG-RVivoLiverRepeat - labetalol.Middle.4day	Labetalol	M		4d	0.103757	0.0859168		-0.0693757	0.000782982	-0.140396	-0.0783193	-0.191071	0.00292731	-0.191211	-0.0690051		0.0658469	0.00368324						-0.0194425		-0.0141955	0.0212481	0.0939791	-0.0685566				0.358105		0.135409		1.03891					-0.143984	0.0537097	-0.0172814
TG-GATES	Rat	Liver	vitro	bolus	TG-Rvitro PRH - acetaminophen.Middle.8hr	Acetaminophen	M		8h	0.26775	0.0860084		-0.0215199	0.331499	0.805668	-0.0251414	0.493302	0.10574	0.194547	0.22437	-0.317059	0.43026	-0.937653	0.156273	-0.0895802			0.416699	-0.455758	-0.146518	0.462848	-0.0800084	0.48772	-0.14613				-0.777662		-0.408479		-0.568523				0.488828	0.0462016	-0.71315	-0.0547727
TG-GATES	Rat	Liver	vivo	repeat	TG-RVivoLiverRepeat - lomustine.Middle.15day	Lomustine	M		15d	-0.0116429	0.0860605		0.0398792	-0.027621	-0.340363	-0.213754	-0.150929	0.219398	0.314097	0.129671		-0.155955	0.28215						0.0240769		0.0795636	0.114245	0.0529491	0.0969782				0.0996688		0.0859223		1.332					-0.027248	-0.294285	0.0236587
PREDICT-IV	Rat	Liver	vitro	repeat	PIV Rvitro Repeat PRH - AMIODA_LD3_LFC	Amiodarone	L		3d	0.120076	0.086194	-0.0139302	0.0888528	0.0017867	0.0737965	-0.0442565	-0.00206713	0.16738	-0.143659		-0.0364625	0.526889	-0.257939	-0.0310514	0.0119057	0.147084	0.00620987	0.0348481	-0.0241353	-0.0116273	-0.0229103	0.0278741	-0.0424673	-0.0674318	0.0440385	-0.0247602	0.114693	0.0896975		0.0252887	0.0132318	-0.00877363	0.0347249		0.00146585	0.0617021	-0.0714035	-0.00626869	-0.00753009
TG-GATES	Rat	Liver	vivo	bolus	TG-RVivoLiverSingle - gemfibrozil.Middle.9hr	Gemfibrozil	M		9h	-0.158643	0.0862567		-0.0957259	-0.265573	-0.00667386	0.010385	0.298904	0.0353305	-0.222616	-0.221021		0.967261	-0.38183						0.32292		-0.331615	-0.065561	0.0202667	-0.0300008				-0.570147		0.100433		-0.483022					0.00566395	0.0556206	0.00797051
TG-GATES	Rat	Liver	vivo	bolus	TG-RVivoLiverSingle - clofibrate.Low.9hr	Clofibrate	L		9h	0.0982159	0.0865391		-0.161317	-0.0509279	-0.336858	0.337464	-0.103021	-0.0699218	-0.205301	0.00712901		0.665666	0.255361						-0.00243066		0.345151	0.0924252	-0.191631	0.11305				0.220046		-0.303038		0.522975					0.123012	0.249934	-0.00243218
TG-GATES	Human	Liver	vitro	bolus	TG-HVitro PHH - griseofulvin.Low.8hr	Griseofulvin	L		8h	-0.0101788	0.0865944	-0.123517	-0.00528537	0.00862744	-0.0137342	-0.160711	0.102565	-0.0937027	-0.110885	0.0607438	0.0539314		0.00895676	-0.0697594	-0.0638755	-0.00708881	-0.0139426	-0.0441552	0.045815	-0.0249982	-0.022557	-0.0740623	0.00474677		-0.00956359	0.114011	-0.0561192	0.0289703	0.0483061	0.00155601	0.0317002	0.0126979	-0.139125	-0.0980876	-0.00586254	0.0104371	0.0906981		-0.0242803
TG-GATES	Rat	Liver	vivo	bolus	TG-RVivoLiverSingle - nitrofurazone.Low.24hr	Nitrofurazone	L		24h	0.00756306	0.0866394		-0.0494111	0.811802	-0.167134	-0.0954913	0.00613361	-0.0130657	0.314441	0.0362961		0.0512049	-0.0403859						-0.0830389		0.00289301	-0.00997068	-0.0116972	0.086867				-0.424942		-0.127052		0.551461					0.0603104	0.00107891	-0.02624
TG-GATES	Human	Liver	vitro	bolus	TG-HVitro PHH - methylene dianiline.High.24hr	Methylene dianiline	H		24h	0.511996	0.0866724	0.116849	-0.385455	-0.321091	-0.408408	-0.139017	-0.269382	0.684948	-0.871644	-0.880464	0.431187		-0.515007	0.165967	0.129911	0.293251	-0.0796868	0.230797	0.49541	1.55901	0.771603	0.314952	0.338817		0.254693	0.6769	-1.12698	0.0940872	-0.0726119	-0.237538	-0.781401	-1.69377	0.196388	0.165498	0.329527	-0.511492	-0.236671		0.327478
TG-GATES	Rat	Liver	vitro	bolus	TG-Rvitro PRH - diazepam.High.8hr	Diazepam	H		8h	-0.0673574	0.0866914		-0.426688	-0.190197	-0.178506	0.0766325	-0.431794	-0.0893634	0.243258	-0.258919	0.105122	0.378295	-0.112916	0.205765	0.00879999			-0.13919	-0.0372095	0.458393	-0.405424	0.0318201	-0.593502	-0.403498				0.0755845		0.382255		-0.281093				0.01515	0.126383	-0.0355148	0.00295835
TG-GATES	Rat	Liver	vivo	repeat	TG-RVivoLiverRepeat - ethionamide.Middle.29day	Ethionamide	M		29d	-0.144977	0.0868394		0.192021	0.489699	0.194025	-0.131629	0.877964	0.0193959	0.0141901	-0.0190468		0.458837	-0.731064						-0.148192		-0.507653	0.23849	-0.013275	-0.141749				-0.110423		-0.217226		2.43257					-0.0677408	-0.227803	-0.0132326
TG-GATES	Rat	Liver	vivo	bolus	TG-RVivoLiverSingle - fluoxetine hydrochloride.High.24hr	Fluoxetine	H		24h	0.0238622	0.0869324		-0.0203763	0.171224	-0.556545	-0.0560667	-0.422217	0.0997538	0.0083626	-0.0770573		-0.126692	0.0202822						-0.018277		0.895862	0.0978142	-0.102312	0.0494072				0.0464259		-0.529341		0.00992794					0.0682478	-0.342188	0.00166664
TG-GATES	Rat	Liver	vivo	bolus	TG-RVivoLiverSingle - tetracycline.Low.9hr	Tetracycline	L		9h	-0.055528	0.0869364		-0.343545	-0.0662376	-0.0611216	0.2548	0.012803	0.0904397	-0.223745	0.0656503		-0.210538	-0.151735						-0.0717968		0.0972117	0.0513786	-0.00401097	0.119764				-0.256352		-0.156504		-0.0853491					0.265225	0.473034	0.0121478
TG-GATES	Rat	Liver	vitro	bolus	TG-Rvitro PRH - ethionamide.High.8hr	Ethionamide	H		8h	0.065661	0.0869673		0.187062	-0.0978074	-0.4251	0.139264	-0.750586	-0.359841	0.216153	-0.189833	0.379347	-0.0631515	-0.102443	0.242611	0.115711			-0.318171	0.183746	-0.319154	0.0133871	-0.309826	-0.636213	0.0758332				-0.504879		-0.0436721		-0.288696				-0.199831	0.0609924	-0.147193	0.00165254
TG-GATES	Rat	Liver	vivo	repeat	TG-RVivoLiverRepeat - fluphenazine.Low.8day	Fluphenazine	L		8d	0.0657399	0.0870706		-0.385738	0.0912627	-0.0328635	0.00455306	-0.3415	-0.0244531	-0.0146397	0.0432783		-0.0357024	0.275167						-0.0388123		-0.0942634	0.0425272	0.389702	0.00953016				0.935522		0.0678514		1.46543					0.0497225	-0.0386136	0.0153163
TG-GATES	Rat	Liver	vivo	bolus	TG-RVivoLiverSingle - lomustine.Middle.3hr	Lomustine	M		3h	-0.0722215	0.0871518		-0.325907	0.129899	-0.333427	-0.0132557	-0.116035	0.0100918	-0.0493332	0.0542461		-0.123564	0.292856						-0.096223		-0.402691	-0.0836067	0.0524189	0.0984516				0.0763228		-0.451557		-0.203902					-0.196518	-0.3857	0.00428101
TG-GATES	Rat	Liver	vivo	repeat	TG-RVivoLiverRepeat - promethazine.High.4day	Promethazine	H		4d	0.157296	0.0871542		0.702553	2.72568	0.62286	-0.0417848	-1.03571	0.486691	-0.0436867	-0.193339		0.270853	-0.153263						-0.101203		1.60229	-0.0161798	0.550625	0.21178				0.666146		-0.320308		2.30056					0.0843088	-0.18146	-0.0992415
TG-GATES	Rat	Liver	vivo	bolus	TG-RVivoLiverSingle - methyldopa.Middle.24hr	Methyldopa	M		24h	0.0899111	0.0872698		0.0877192	-0.0506108	0.280197	-0.105211	-0.101128	-0.00180768	-0.0820314	0.0608079		-0.105127	-0.592017						0.0811987		0.228648	-0.0386538	0.259555	-0.044679				0.249337		-0.199998		-0.372766					0.0226831	0.0216392	0.0391087
TG-GATES	Rat	Liver	vivo	repeat	TG-RVivoLiverRepeat - amiodarone.Low.4day	Amiodarone	L		4d	-0.0332848	0.0872833		-0.477566	0.0422706	-0.152106	0.0983653	-0.270835	-0.0366538	-0.0828124	-0.132934		0.202992	-0.337456						-0.0497271		-0.137694	0.0514593	0.0688922	0.0581787				0.207575		0.0127239		-0.179026					0.0457297	0.361627	-0.0226264
TG-GATES	Rat	Liver	vitro	bolus	TG-Rvitro PRH - terbinafine.High.24hr	Terbinafine	H		24h	-0.0928431	0.0873205		0.038617	0.196626	-0.0855972	-0.253328	-0.181297	0.0239965	0.0676282	-0.136971	-0.00342833	0.0592765	-0.0160564	0.0886591	0.0625209			-0.148255	0.0103851	0.0761795	-0.000414219	0.139089	-0.0979108	-0.0171581				-0.055444		0.0562719		0.110096				-0.0325213	-0.0695307	0.0932375	0.0229062
TG-GATES	Rat	Kidney	vivo	repeat	TG-RVivoKidneyRepeat - captopril.High.8day	Captopril	H		8d	-0.182512	0.0873979	-0.0534838	1.28318	0.353916	-0.246011	0.223469	0.0680565	0.0518888	0.0905759	-0.0539551	0.201453	0.326256	0.7691		-0.0595415			-0.137023	-0.0869591	0.223482	0.127365	0.0455477	0.106708	0.0168703				-0.787213		-0.101443		0.238496				-0.150538	-0.0312507	0.378978	0.140532
TG-GATES	Rat	Liver	vitro	bolus	TG-Rvitro PRH - pemoline.Low.2hr	Pemoline	L		2h	-0.0386095	0.0875021		-0.177333	0.327819	-0.226639	-0.0221084	-0.0597488	-0.033762	-0.0668072	0.0101839	0.0328947	-0.191768	0.143339	0.176314	0.180095			-0.136597	-0.0829321	-0.145743	-0.0281395	0.135686	-0.0575558	-0.118881				0.0187744		0.292083		-0.0128109				-0.0255964	0.0929401	-0.0289326	-0.0508681
TG-GATES	Rat	Liver	vitro	bolus	TG-Rvitro PRH - chlorpromazine.High.2hr	Chlorpromazine	H		2h	-0.0130682	0.0875232		0.0897788	0.0407716	-0.106475	0.00841121	-0.0497314	-0.0867547	0.178652	0.0320377	0.0872896	0.0687287	0.129556	0.136656	-0.0543752			-0.209265	-0.0421844	0.0783947	-0.158965	0.0981235	-0.374291	-0.0593186				0.0987502		0.0206647		-0.0871493				-0.0424274	0.00790385	0.0821756	-0.0251026
TG-GATES	Rat	Kidney	vivo	repeat	TG-RVivoKidneyRepeat - phenylanthranilic acid.High.8day	Phenylanthranilic acid	H		8d	-0.242267	0.087597	0.126233	0.319468	0.166473	0.410783	0.255704	0.00337874	0.0206222	0.00477618	-0.17818	-0.167635	0.0742262	0.082367		-0.344588			0.0392327	0.0499298	-0.0658621	0.119041	-0.199506	-0.188974	0.0241952				-0.622503		0.00487795		0.158301				-0.15524	-0.0407943	0.0239485	-0.159548
TG-GATES	Rat	Liver	vivo	repeat	TG-RVivoLiverRepeat - dantrolene.Middle.29day	Dantrolene	M		29d	-0.101358	0.0876396		-0.0184934	0.385596	0.0606895	-0.153246	0.405528	0.299197	-0.289786	0.417321		0.523329	-0.18846						-0.166337		0.048635	-0.336287	0.0710632	-0.126342				0.151041		0.220861		3.2235					0.0918888	-0.597148	-0.0608277
TG-GATES	Rat	Liver	vitro	bolus	TG-Rvitro PRH - rifampicin.Middle.2hr	Rifampicin	M		2h	0.0337067	0.0877596		-0.0471579	-0.0067626	0.0134346	0.0120718	-0.0185618	-0.00640946	0.0882813	0.0982958	0.040654	0.0231512	-0.118491	-0.156561	0.196985			0.0481875	0.0770125	-0.0468597	-0.0251196	-0.156013	-0.00781995	-0.0176991				-0.132871		-0.201632		-0.0901121				0.0350345	-0.0948929	-0.0240916	-0.0018872
TG-GATES	Rat	Kidney	vivo	repeat	TG-RVivoKidneyRepeat - acetazolamide.High.4day	Acetazolamide	H		4d	-0.0772903	0.0877958	0.0983739	-0.0502998	-0.074751	-0.0468635	0.151684	-0.10548	0.167705	0.285996	0.021263	-0.250809	-0.0269455	-0.794378		-0.270986			0.0807133	0.0378467	0.107254	0.136671	-0.165644	-0.152606	-0.307659				0.299865		0.070312		0.0535225				-0.0154627	-0.105312	-0.070698	0.103636
TG-GATES	Rat	Liver	vivo	bolus	TG-RVivoLiverSingle - puromycin aminonucleoside.Low.9hr	Puromycin	L		9h	-0.0866721	0.0878031		-0.706237	0.11801	-0.0747526	0.015643	-0.553812	-0.140994	-0.176383	-0.111804		0.263126	-0.270839						0.00997705		0.0299411	0.0828715	0.0887322	-0.0799902				-0.250413		-0.0441905		0.382599					0.014688	-0.333313	-0.0319017
TG-GATES	Human	Liver	vitro	bolus	TG-HVitro PHH - galactosamine.Low.8hr	Galactosamine	L		8h	-0.0760231	0.0879202	-0.0776565	-0.00658958	-0.0192724	-0.0989419	0.00129572	0.078683	0.097272	-0.0248963	-0.00385822	-0.0700331		0.00045884	0.00239986	0.0176736	-0.0274778	-0.0530969	0.00571145	-0.0317674	-0.0270176	0.165969	-0.125319	-0.0261963		0.0757884	0.130477	0.0474738	0.016019	0.000749611	0.0574313	-0.0416998	0.0832729	-0.111634	0.0556037	0.0560146	0.0213836	0.0562739		-0.0105511
TG-GATES	Rat	Liver	vivo	bolus	TG-RVivoLiverSingle - moxisylyte.Low.9hr	Moxisylyte	L		9h	0.0154887	0.087936		-0.371004	-0.202595	-0.104736	-0.0388938	0.0940192	-0.0189054	0.0534029	0.0922014		0.0459187	0.0764829						-0.124134		0.197926	-0.0803943	0.046664	0.0364261				-0.773421		0.0421102		-0.382483					0.135434	0.154253	0.048432
TG-GATES	Rat	Liver	vivo	repeat	TG-RVivoLiverRepeat - diltiazem.Low.29day	Diltiazem	L		29d	-0.0724366	0.0880018		0.304405	0.0861954	0.190967	-0.0509429	0.0662949	0.00722348	0.353228	0.0550899		-0.155963	-0.858261						-0.092611		-0.30318	-0.035224	-0.122503	-0.0178502				0.095101		0.0962398		-0.0465466					-0.248722	0.101374	0.0157038
TG-GATES	Rat	Liver	vitro	bolus	TG-Rvitro PRH - metformin.Middle.24hr	Metformin	M		24h	0.128023	0.0880475		0.0361835	0.23589	-0.0387625	-0.0147504	-0.0130441	-0.0763009	0.110802	-0.116395	0.163949	0.0127728	-0.0739915	-0.0690994	0.000231805			-0.0227598	-0.0517631	0.0264685	-0.107448	-0.0532356	0.0474979	0.0272959				0.171612		-0.124753		-0.180506				-0.0367423	-0.101786	0.00480773	-0.00606361
TG-GATES	Rat	Liver	vitro	bolus	TG-Rvitro PRH - doxorubicin.Low.24hr	Doxorubicin	L		24h	0.0699796	0.0881167		0.073966	0.421874	0.0404665	-0.152714	0.0561893	0.037207	-0.0808067	0.277855	0.0518229	0.161418	0.403147	-0.187758	-0.180097			0.0583916	0.040202	0.19214	0.272372	-0.0584341	0.0159279	0.0763629				-0.0195229		-0.0439507		0.579387				-0.0591974	-0.0344463	0.162041	0.0174561
TG-GATES	Rat	Liver	vivo	bolus	TG-RVivoLiverSingle - cisplatin.Middle.9hr	Cisplatin	M		9h	-0.0480255	0.0881991		0.320137	0.10625	-0.123242	-0.0591479	0.0862018	0.140612	-0.00825557	0.0442255		0.0416041	-0.0555515						0.0368291		-0.125079	0.0276519	0.0569503	0.165104				0.10805		-0.411335		0.344833					-0.0373443	0.0370586	0.015685
TG-GATES	Rat	Liver	vivo	bolus	TG-RVivoLiverSingle - ethanol.Middle.9hr	Ethanol	M		9h	-0.0877007	0.0882548		0.277067	0.396782	-0.368056	0.215354	0.0862928	-0.0225895	0.203778	0.0763075		0.219991	0.0551685						-0.00634676		0.667679	0.17099	0.030707	0.0211699				-0.946833		-0.318846		0.23498					0.0315329	0.106511	0.0372439
TG-GATES	Rat	Liver	vitro	bolus	TG-Rvitro PRH - amitriptyline.Low.24hr	Amitriptyline	L		24h	-0.099804	0.0882626		-0.0904322	0.212295	0.0558182	-0.0972366	-0.0819265	0.117995	0.0072192	-0.0290088	-0.0309327	-0.0656811	0.196467	0.121867	-0.0418686			0.0153765	-0.0584643	-0.0594362	0.216334	-0.192716	-0.0885796	0.0226776				-0.106866		0.187887		0.118392				-0.0288236	0.0107583	-0.0722547	0.0576665
TG-GATES	Rat	Liver	vivo	repeat	TG-RVivoLiverRepeat - acarbose.Low.8day	Acarbose	L		8d	0.0809337	0.0882828		-0.0547424	0.16269	-0.137267	0.0481586	0.4211	0.0329176	-0.204968	-0.0582065		-0.220685	-0.153064						-0.0877735		0.130917	0.17847	0.150576	0.00115514				0.110968		0.180416		-0.0140777					-0.0539217	-0.218959	-0.0157284
TG-GATES	Rat	Liver	vivo	bolus	TG-RVivoLiverSingle - rosiglitazone maleate.Low.3hr	Rosiglitazone	L		3h	-0.0723311	0.088288		-0.0867776	0.62978	-0.168357	0.0995059	-0.177018	0.170296	0.163186	0.0817435		0.37683	0.390454						-0.0299255		0.253438	0.163142	-0.114002	0.023657				-1.02243		0.326191		0.31721					0.0109744	-0.405725	-0.0348027
TG-GATES	Rat	Liver	vivo	bolus	TG-RVivoLiverSingle - pemoline.Low.9hr	Pemoline	L		9h	-0.00159968	0.0882932		-0.30694	0.249435	-0.227312	-0.0732195	-0.572195	0.092667	-0.383443	0.112602		-0.125813	0.396791						-0.106976		-0.157786	0.0403488	0.171109	-0.06505				-0.183268		-0.351309		0.248033					0.00038589	0.133275	0.0303828
TG-GATES	Human	Liver	vitro	bolus	TG-HVitro PHH - griseofulvin.Middle.8hr	Griseofulvin	M		8h	0.0802198	0.0883123	-0.155286	0.119576	0.0342789	-0.0539391	-0.069274	0.144407	-0.10561	-0.0817883	0.151337	-0.117184		0.0368776	-0.12482	-0.0687548	-0.0725146	0.0783724	-0.11864	0.301563	-0.00314147	-0.185403	-0.10125	0.0530829		-0.111498	0.160327	-0.0928811	-0.0327411	-0.00654045	-0.0666725	0.0579419	-0.0833056	-0.243155	-0.109152	0.0550026	0.0618262	0.0778935		0.00112484
TG-GATES	Rat	Liver	vitro	bolus	TG-Rvitro PRH - lornoxicam.High.8hr	Lornoxicam	H		8h	0.0646636	0.0883357		0.173546	0.237207	-0.0493353	-0.0684811	0.237573	0.0494717	-0.342159	0.0561706	0.030992	0.29241	0.226316	-0.229219	0.22054			0.289002	0.161934	0.222601	0.2827	-0.12197	-0.0402623	0.234557				0.190476		-0.107407		-0.133901				-0.139485	0.181565	0.15625	0.0825967
TG-GATES	Rat	Liver	vivo	bolus	TG-RVivoLiverSingle - amphotericin B.Low.6hr	Amphotericin B	L		6h	0.0495431	0.0883486		-0.390589	-0.0386627	-0.152842	0.245403	-0.0808253	-0.044987	0.077206	-0.0996265		-0.0189869	0.435677						-0.047126		0.14014	0.122993	0.0110951	0.0444651				-0.266979		-0.293728		-0.447784					0.0352741	-0.0310043	-0.0139155
TG-GATES	Rat	Liver	vivo	bolus	TG-RVivoLiverSingle - phorone.Middle.6hr	Phorone	M		6h	0.310658	0.0884581		0.0977158	1.80284	2.24429	-0.0182611	-0.61915	0.260808	-0.156298	-0.0559095		0.658766	-0.394551						-0.0341483		-0.0197253	-0.0502175	-0.0725378	0.117				-0.864245		-0.262461		1.06286					0.0181386	-0.610679	-0.00463759
TG-GATES	Rat	Liver	vitro	bolus	TG-Rvitro PRH - chlormadinone.Low.24hr	Chlormadinone	L		24h	-0.026526	0.0885005		0.361767	0.0817313	-0.0133174	0.035839	-0.0381316	-0.0896503	0.179073	-0.00586343	-0.161813	0.161239	0.226821	-0.0516314	-0.104078			-0.0611316	-0.0361349	0.0996153	0.190596	-0.129259	0.262424	-0.0942626				0.316684		0.202682		0.0662098				-0.0805888	0.126064	-0.0376159	-0.0111134
TG-GATES	Rat	Liver	vitro	bolus	TG-Rvitro PRH - gentamicin.Middle.24hr	Gentamicin	M		24h	-0.0322997	0.0885042		0.041162	-0.640637	0.304966	-0.210166	-0.41487	0.399762	0.186548	0.134597	0.273548	0.117575	-0.424871	-0.0695893	0.0126374			-0.367024	0.168804	0.563253	1.11236	-0.0734093	0.225653	-0.23675				-0.0161216		-0.0298678		-0.128937				0.244915	-0.124481	0.280909	0.0421609
TG-GATES	Human	Liver	vitro	bolus	TG-HVitro PHH - simvastatin.High.8hr	Simvastatin	H		8h	0.0149161	0.0885534	0.0987455	0.296575	-0.23549	-0.160537	0.0256098	-0.105071	0.0803333	0.204766	-0.244785	-0.100915		-0.239467	0.0947831	0.153941	-0.0105135	-0.0250498	-0.00111445	-0.185023	-0.00122224	0.209537	-0.00896581	0.0266687		-0.177888	-0.200078	0.412703	0.130383	0.118255	0.144162	-0.0935455	-0.152826	-0.0545176	-0.0298741	-0.053033	-0.146252	-0.038144		0.00830055
TG-GATES	Rat	Liver	vivo	bolus	TG-RVivoLiverSingle - tunicamycin.Low.6hr	Tunicamycin	L		6h	-0.0733726	0.0886001		-0.0737343	-0.072243	0.162668	-0.0733185	-0.411595	-0.0253516	-0.33465	-0.108488		-0.0425022	0.0549509						-0.0559862		-0.184746	0.3156	-0.218578	-0.0873824				0.130718		0.0541441		0.225398					0.11966	-0.598717	0.00620524
TG-GATES	Rat	Liver	vitro	bolus	TG-Rvitro PRH - nicotinic acid.Low.8hr	Nicotinic acid	L		8h	-0.0244741	0.088621		0.00902815	0.024638	-0.0768371	-0.00179881	-0.0578176	0.0417931	-0.0454364	-0.0306453	0.045995	-0.215075	-0.0217518	0.0742092	-0.0246511			-0.00301666	0.0364616	0.0868819	0.0531378	0.0220888	0.0260648	-0.0119938				0.0466258		-0.0971572		-0.0611021				-0.100493	-0.113778	-0.136716	-0.00321838
TG-GATES	Rat	Liver	vivo	repeat	TG-RVivoLiverRepeat - nitrofurazone.Middle.4day	Nitrofurazone	M		4d	0.038369	0.0886468		-0.145609	0.649301	-0.104884	0.0729069	0.174314	-0.0385107	0.0845684	0.171419		-0.112325	-0.182086						-0.108588		-0.139679	-0.0846668	0.114278	0.00831276				-0.537253		0.17235		0.643033					-0.0293223	-0.211355	-0.0145321
TG-GATES	Rat	Liver	vivo	repeat	TG-RVivoLiverRepeat - caffeine.Middle.29day	Caffeine	M		29d	0.0858036	0.0889252		-0.00882541	0.000843887	0.161613	-0.0774513	0.201962	0.122936	0.150652	-0.0295051		-0.0547992	-0.156991						0.0134048		0.0929568	0.0340808	0.0376675	0.125368				-0.184396		-0.194511		0.428948					-0.108576	-0.333708	-0.00529231
TG-GATES	Rat	Liver	vivo	repeat	TG-RVivoLiverRepeat - phenobarbital.Low.4day	Phenobarbital	L		4d	0.167353	0.0889536		0.475808	1.14973	-0.0323473	-0.0811764	0.119335	0.0327488	-0.136599	0.131372		-0.111733	0.02849						-0.0149616		0.186192	-0.0741917	0.089453	0.0862604				0.317119		-0.100537		0.756411					0.0802633	-0.11444	-0.0134668
TG-GATES	Rat	Liver	vivo	bolus	TG-RVivoLiverSingle - chlorpheniramine.High.3hr	Chlorpheniramine	H		3h	0.0118778	0.0889834		0.123905	0.339086	-0.334781	-0.0503723	-0.582879	0.170998	0.43281	0.06261		-0.335364	0.145351						0.00309006		0.242826	0.00587544	-0.293688	0.348112				0.531517		0.235077		-0.0648313					-0.173363	0.10514	-0.0117582
TG-GATES	Rat	Liver	vivo	bolus	TG-RVivoLiverSingle - terbinafine.Middle.6hr	Terbinafine	M		6h	-0.043457	0.0890034		-0.0372147	0.109713	-0.148912	-0.054365	-0.00447198	-0.122645	-0.151787	0.0683783		0.571223	0.48787						-0.186797		0.212773	-0.0488426	-0.0507729	-0.0986529				-0.717281		-0.032213		0.433302					0.140331	-0.0976871	0.0306981
TG-GATES	Rat	Liver	vivo	bolus	TG-RVivoLiverSingle - ketoconazole.High.9hr	Ketoconazole	H		9h	0.231648	0.0891554		0.15268	0.235181	0.154027	-0.00233686	-0.0220357	0.233873	-0.594516	-0.0263393		-0.0167243	0.179117						0.0340176		-0.460758	-0.157971	0.485485	-0.212078				0.572168		-0.212539		0.986613					-0.092113	0.436492	0.0239225
TG-GATES	Rat	Liver	vivo	repeat	TG-RVivoLiverRepeat - cisplatin.High.4day	Cisplatin	H		4d	-0.113708	0.0892306		-0.0412241	0.109311	-0.11605	-0.185917	-0.17144	0.0707481	-0.496257	0.0462759		0.128477	0.0440387						-0.0875345		-0.0204885	-0.0123292	-0.135635	-0.269909				0.483937		0.00861826		0.883127					0.184637	0.115153	0.0271466
TG-GATES	Rat	Liver	vitro	bolus	TG-Rvitro PRH - bromobenzene.High.2hr	Bromobenzene	H		2h	-0.0471762	0.0892426		-0.10767	0.0562095	-0.0469207	-0.157196	-0.0552658	0.0423846	-0.00627319	0.0517316	-0.0950221	-0.045944	-0.528636	-0.0956746	-0.0997276			-0.0307098	0.115428	0.0406339	-0.0834845	-0.104502	-0.0260063	0.125377				0.185114		-0.178989		-0.199038				-0.310667	0.073584	-0.0370667	0.0530063
TG-GATES	Rat	Liver	vitro	bolus	TG-Rvitro PRH - tacrine.Low.2hr	Tacrine	L		2h	-0.00191699	0.0892859		-0.022772	0.0548536	-0.0300529	0.082848	-0.084103	-0.0663741	0.0856454	-0.101315	0.0494069	-0.0431532	-0.0113969	-0.0716432	0.155409			0.138385	-0.0675358	-0.0520873	-0.195598	0.18034	-0.257306	-0.0219458				-0.0726979		0.0136616		-0.0247928				-0.0238222	0.0119037	0.0305932	0.0332269
TG-GATES	Rat	Liver	vivo	bolus	TG-RVivoLiverSingle - labetalol.Middle.24hr	Labetalol	M		24h	-0.0999228	0.0893975		-0.121678	-0.025245	0.0406741	0.210862	0.238224	0.0874114	0.0165882	0.104543		-0.107496	-0.0981852						-0.0268185		-0.345504	0.0599116	-0.152706	-0.0735548				0.109578		-0.0277425		0.112359					0.0759417	0.162746	-0.0137145
TG-GATES	Rat	Liver	vivo	repeat	TG-RVivoLiverRepeat - tamoxifen.High.29day	Tamoxifen	H		29d	-0.0138932	0.0894097		-0.108928	1.00084	-0.0516276	-0.0402912	0.369306	0.108914	-0.144072	-0.0320586		0.358391	-0.0244109						0.056522		0.606611	0.124508	0.585161	0.0483031				-0.715772		0.524181		2.81369					0.0519464	0.598967	-0.0164917
TG-GATES	Rat	Liver	vivo	bolus	TG-RVivoLiverSingle - tamoxifen.Middle.6hr	Tamoxifen	M		6h	0.265738	0.0894807		0.203939	-0.195869	-0.0438053	-0.17895	0.103408	0.0339342	0.301016	0.138941		0.0595789	0.6666						-0.0370739		0.259375	-0.0588676	-0.0917438	-0.0083026				0.210514		0.132886		0.364078					-0.0379412	0.322124	0.0368574
TG-GATES	Rat	Liver	vivo	bolus	TG-RVivoLiverSingle - tannic acid.Low.24hr	Tannic acid	L		24h	-0.0625094	0.089702		-0.408618	-0.062041	0.292495	-0.152784	-0.00936124	0.00279773	0.115206	0.0554798		-0.0597659	-0.444895						-0.0741597		-0.0608121	0.00603143	-0.299377	0.0557418				0.767133		0.0380484		0.0941445					-0.138433	-0.00186767	0.0168518
TG-GATES	Rat	Liver	vivo	repeat	TG-RVivoLiverRepeat - mexiletine.Low.29day	Mexiletine	L		29d	-0.0965318	0.0897471		0.0695143	-0.0648729	-0.422181	-0.0467892	-0.124376	0.0918459	0.388915	0.102345		0.190486	-0.926405						-0.104708		0.187414	-0.0325833	0.0736645	0.200837				-0.342051		0.0410092		-0.212974					0.0457423	-0.0393471	-0.0217987
TG-GATES	Rat	Liver	vitro	bolus	TG-Rvitro PRH - azathioprine.Low.8hr	Azathioprine	L		8h	-0.0223856	0.089776		-0.0224669	0.168497	-0.191684	0.0135118	-0.0611215	0.0230438	-0.126271	0.0600506	0.0539834	-0.0842519	0.125178	0.0952889	-0.0511884			-0.137891	0.0388376	0.00394899	0.0265895	0.00186617	-0.0337837	0.00971392				0.0802678		0.212946		0.237493				-0.0436577	0.141152	-0.0418677	-0.00147587
TG-GATES	Human	Liver	vitro	bolus	TG-HVitro PHH - carbon tetrachloride.Middle.8hr	Carbon tetrachloride	M		8h	-0.0179085	0.0898008	-0.0781501	0.0501949	-0.0382496	-0.00620995	-0.0554269	-0.0297729	0.0524527	0.0486497	-0.0759052	0.011617		-0.114483	-0.153419	-0.0905767	-0.0267751	-0.0169494	-0.0251068	0.0191528	-0.0319252	-0.00523144	-0.0313722	-0.0309182		-0.101632	-0.0249207	0.0696868	-0.0492662	-0.00174889	-0.0434984	-0.0664591	-0.0027211	0.324469	-0.184878	0.0019508	-0.0520687	-0.00753585		0.0120574
TG-GATES	Human	Liver	vitro	bolus	TG-HVitro PHH - cyclophosphamide.High.2hr	Cyclophosphamide	H		2h	0.0262844	0.0898242	0.14993	0.0691914	0.0242472	-0.095913	-0.0367414	-0.0047709	0.083428	-0.0284357	-0.164879	-0.0469211		0.0908859	0.205766	0.11082	0.0170839	-0.0398355	-0.0674184	-0.0437046	0.00550533	-0.0392001	-0.017688	0.0167403		-0.0302597	-0.0491399	-0.0115951	0.059409	-0.0142743	0.0156915	-0.0437607	-0.0401708	0.0978811	-0.0287396	-0.00764712	-0.0909416	0.00313785		0.00671303
TG-GATES	Rat	Kidney	vivo	repeat	TG-RVivoKidneyRepeat - valproic acid.Low.29day	Valproic acid	L		29d	-0.0593917	0.0899804	0.0550247	0.162684	0.116443	-0.187471	0.1338	-0.0693433	0.0438346	0.250503	0.0203292	-0.0716925	0.0238554	0.0232656		-0.45998			0.0307054	-0.0789866	0.0546418	0.276107	-0.0548658	-0.0973178	-0.0570861				-0.0213627		0.160773		0.066732				0.061285	0.246344	0.0444583	0.136447
TG-GATES	Rat	Liver	vivo	bolus	TG-RVivoLiverSingle - terbinafine.Low.9hr	Terbinafine	L		9h	0.0951913	0.0899837		-0.138311	0.0723095	0.437936	0.169162	-0.336255	0.107843	-0.0406636	-0.235887		0.477191	-0.352247						0.0923011		0.0851068	-0.00373195	0.225271	0.0888692				-1.29878		-0.208524		0.113771					0.0858649	-0.156981	-0.0241608
TG-GATES	Rat	Kidney	vivo	repeat	TG-RVivoKidneyRepeat - carboplatin.High.8day	Carboplatin	H		8d	-0.0278951	0.0900082	-0.0715507	0.602393	0.140287	-0.180288	-0.167909	0.0604529	0.153965	0.259132	-0.00672193	-0.114514	0.0376379	-0.0712872		-0.1467			-0.0331241	0.0382228	0.101655	-0.0040968	-0.109974	0.0668893	-0.0341269				-0.514774		0.0598833		0.0385634				-0.0140323	0.255351	-0.0608607	-0.0228442
TG-GATES	Rat	Liver	vivo	repeat	TG-RVivoLiverRepeat - nitrofurazone.High.15day	Nitrofurazone	H		15d	0.307538	0.0901798		0.0662867	1.48999	0.0432972	-0.0654876	-0.235991	0.0830688	-0.322646	-0.259626		0.0866108	0.0283592						-0.0280495		-0.160225	-0.0121148	0.365355	-0.0329589				-0.561901		-0.648525		2.31449					0.106344	-0.0522338	-0.0307977
TG-GATES	Rat	Liver	vitro	bolus	TG-Rvitro PRH - pemoline.High.2hr	Pemoline	H		2h	-0.00485437	0.0902522		-0.0291436	0.165397	-0.258923	-0.00825034	-0.0469797	-0.031586	-0.0638964	-0.0410507	-0.0285484	-0.00135056	0.35931	-0.0491342	0.0199419			-0.113001	-0.00252736	0.0607729	0.0547457	0.0667693	-0.0681469	-0.0109092				0.135734		-0.0494169		-0.044233				0.00238711	0.0579178	0.0657716	-0.032882
TG-GATES	Rat	Liver	vivo	repeat	TG-RVivoLiverRepeat - disopyramide.High.4day	Disopyramide	H		4d	0.0854763	0.0902671		-0.279829	0.416174	-0.0584808	0.256321	0.00989596	0.0805919	-0.121498	-0.0575265		0.307673	-0.190844						-0.0175428		0.649141	0.0716241	0.397764	-0.299316				-0.544059		-0.362303		1.5366					0.291807	-0.241674	-0.0514037
TG-GATES	Human	Liver	vitro	bolus	TG-HVitro PHH - acetaminophen.High.8hr	Acetaminophen	H		8h	0.155125	0.0903311	0.266417	-0.581834	-0.0775387	-0.243587	0.0702888	-0.0749103	0.17352	0.195082	0.339177	0.108028		-0.0290085	0.297561	0.140155	0.256259	-0.0413676	0.145549	-0.0463647	-0.0445558	-0.0808465	0.272145	0.0531128		0.0693644	-0.611571	-1.20741	-0.10665	-0.238886	-0.418428	-0.279956	-0.701063	0.142166	0.13515	0.300151	-0.812321	-0.00317027		0.108271
TG-GATES	Human	Liver	vitro	bolus	TG-HVitro PHH - hexachlorobenzene.Low.24hr	Hexachlorobenzene	L		24h	0.0473177	0.0903951	0.0953351	0.0853752	0.0761522	-0.0273443	-0.0701851	0.0288143	-0.0331024	0.031745	0.0191021	-0.00687194		0.115269	-0.0849745	-0.0145348	0.00977194	-0.0670484	-0.0893387	0.171324	0.0575853	-0.0488274	0.0343265	0.0521347		-0.12795	-0.0126274	-0.0864855	-0.0343233	-0.0802736	-0.00715055	-0.00494271	-0.00955033	-0.0404704	0.0404811	0.103082	0.150339	0.10782		-0.0120213
TG-GATES	Rat	Liver	vivo	repeat	TG-RVivoLiverRepeat - pemoline.Low.8day	Pemoline	L		8d	0.282189	0.0903987		0.148682	-0.115206	0.0591699	-0.0516741	-0.054673	-0.0999317	0.356776	0.01381		0.140609	0.371568						0.125363		-0.0395551	0.0599161	0.109899	-0.051007				-0.0205012		-0.245367		0.237309					0.170936	0.410119	0.00669517
TG-GATES	Rat	Liver	vivo	bolus	TG-RVivoLiverSingle - ranitidine.Low.9hr	Ranitidine	L		9h	-0.0386114	0.0904775		-0.00794904	0.0238954	-0.361361	-0.0546755	-0.511047	0.101471	-0.135437	-0.193764		0.228847	0.146094						-0.0315334		-0.578191	0.15092	0.0888144	0.0162679				0.808106		-0.354224		-0.193944					0.0337097	-0.153753	-0.0113846
TG-GATES	Rat	Liver	vivo	bolus	TG-RVivoLiverSingle - tunicamycin.High.6hr	Tunicamycin	H		6h	-0.0971142	0.0905219		-0.274807	-0.159499	-0.0552666	0.0400304	-0.401575	-0.00951137	-0.339731	-0.0887343		0.0691322	-0.310847						0.0288161		0.536162	0.0919572	-0.334209	-0.220109				-0.763683		-0.405167		-0.311376					0.0698611	0.074868	0.0101082
TG-GATES	Rat	Liver	vivo	repeat	TG-RVivoLiverRepeat - naproxen.Middle.29day	Naproxen	M		29d	0.0680266	0.090528		0.0463868	0.0190143	-0.112363	-0.162663	0.0893536	0.0803226	-0.0534322	0.0376194		0.00240685	-0.588569						-0.0540514		0.526138	0.0319718	0.0185903	0.0192974				0.0728652		0.0687002		1.10805					-0.0124972	0.382697	0.0356309
TG-GATES	Rat	Liver	vivo	bolus	TG-RVivoLiverSingle - erythromycin ethylsuccinate.Low.24hr	Erythromycin	L		24h	0.0861351	0.0905342		0.102677	-0.0369915	-0.192534	0.00292787	0.199884	-0.00467023	-0.222012	0.15893		0.00512833	0.241771						-0.0217912		-0.159778	-0.146685	-0.0651878	-0.0741406				0.500595		-0.0631878		0.00600194					0.122328	-0.24446	-0.0124837
TG-GATES	Rat	Liver	vivo	bolus	TG-RVivoLiverSingle - valproic acid.Low.6hr	Valproic acid	L		6h	-0.215713	0.0906069		-0.154082	-0.136875	-0.356174	0.0227601	0.0220689	0.0529163	-0.0921214	-0.181214		-0.0642961	-0.450255						-0.164869		-0.412237	-0.00813506	-0.0149886	0.00447523				0.208134		-0.199806		0.381407					-0.00235458	0.299197	0.0310062
TG-GATES	Rat	Liver	vivo	repeat	TG-RVivoLiverRepeat - doxorubicin.Middle.8day	Doxorubicin	M		8d	-0.34837	0.0906113		-0.319264	-0.112837	-0.503564	0.00397159	0.515957	-0.00091257	-0.997132	0.134397		0.000630333	0.0584657						-0.320174		-0.484024	0.099442	0.175095	-0.126797				-0.85368		0.203815		0.412921					-0.141094	-0.103196	0.0419522
TG-GATES	Rat	Liver	vitro	bolus	TG-Rvitro PRH - chlormadinone.High.2hr	Chlormadinone	H		2h	0.0765885	0.090737		0.0350309	0.0204341	-0.689124	0.319815	-0.111663	-0.0321234	-0.00845412	-0.00652998	0.136027	0.127995	-0.0429956	0.0345549	0.0986791			0.0930811	-0.0972316	-0.0352806	-0.0387061	0.264565	0.125552	0.0302506				-0.0460432		-0.168179		-0.0518752				-0.170584	0.0338514	0.17388	0.0370561
TG-GATES	Human	Liver	vitro	bolus	TG-HVitro PHH - 2,4-dinitrophenol.Middle.8hr	2,4-dinitrophenol	M		8h	0.0364651	0.0908607	0.0431156	0.0518758	0.0933866	-0.130718	-0.0415981	-0.0396129	-0.0285097	0.110288	-0.091628	0.13369		-0.0881251	0.10858	-0.00798601	-0.1021	-0.00869174	-0.152596	0.255378	0.0473589	0.0108864	-0.107621	0.0350757		0.0995118	0.0915897	-0.069366	0.0186794	0.0198177	-0.00312846	-0.0936238	-0.151401	-0.206936	0.0334607	0.0463852	0.0203231	0.0107358		0.0127956
TG-GATES	Rat	Liver	vivo	bolus	TG-RVivoLiverSingle - penicillamine.Middle.9hr	Penicillamine	M		9h	0.12226	0.0909139		0.334844	0.538204	0.324001	-0.0246485	-0.726895	0.204651	0.238341	-0.224403		0.278512	-0.0313257						-0.0399269		0.0643337	0.0211685	-0.151136	0.0383235				-0.0688001		-0.327863		0.215749					-0.0228524	0.262448	0.0412518
TG-GATES	Rat	Kidney	vivo	bolus	TG-RVivoKidneySingle - gentamicin.Middle.3hr	Gentamicin	M		3h	-0.0593161	0.091019	0.257075	0.0331353	0.0520472	0.0238974	0.243187	0.0885352	0.0471897	0.172315	0.146241	-0.00116701	0.00225377	-0.63601		-0.351886			-0.0209539	0.00192262	0.0206562	-0.0239472	0.250116	-0.00467562	-0.135465				-0.698576		-0.0632662		0.0698267				0.0041722	-0.229381	-0.0585456	0.108858
TG-GATES	Rat	Liver	vivo	repeat	TG-RVivoLiverRepeat - papaverine.Low.8day	Papaverine	L		8d	0.0281107	0.0910695		-0.000536894	0.0743739	0.166429	0.345789	0.224891	0.126689	-0.0285881	-0.0327195		-0.0775999	-0.219221						0.0643896		0.15179	0.22023	-0.00946998	-0.252808				0.354001		-0.057881		0.455767					-0.0980513	0.0482927	-0.00841365
TG-GATES	Rat	Liver	vivo	bolus	TG-RVivoLiverSingle - clomipramine.Low.24hr	Clomipramine	L		24h	-0.048519	0.0911184		-0.048691	0.08485	0.127396	0.0912215	-0.116832	0.132669	0.0798082	-0.0949437		0.114126	0.301843						-0.0907982		-0.161024	0.1524	-0.0564466	0.0471454				-0.884401		0.0230126		0.0971241					0.0369724	0.421961	-0.00866073
TG-GATES	Rat	Liver	vivo	repeat	TG-RVivoLiverRepeat - labetalol.Low.4day	Labetalol	L		4d	0.0303529	0.0911887		-0.22537	-0.0858161	0.0959451	-0.0713109	0.181281	-0.0823421	0.16049	0.100362		0.0564601	-0.257714						0.0163871		-0.299158	0.0214606	-0.014424	-0.0726866				0.531139		0.024911		0.755742					-0.0849688	0.0747147	-0.00639757
TG-GATES	Rat	Liver	vivo	bolus	TG-RVivoLiverSingle - imipramine.Low.9hr	Imipramine	L		9h	-0.218162	0.091236		0.0631234	-0.0271656	-0.234011	-0.0837931	0.0323473	-0.0154699	0.236934	-0.00671888		-0.267329	0.240337						0.0989183		0.212892	0.03587	0.118172	-0.0748646				0.548333		-0.0156467		-0.454971					-0.00104933	0.0606712	-0.00870846
TG-GATES	Rat	Liver	vivo	bolus	TG-RVivoLiverSingle - gefitinib.Low.9hr	Gefitinib	L		9h	-0.156386	0.091269		-0.242006	-0.161012	0.208052	0.184487	-0.677857	0.175715	-0.197082	-0.167873		0.187008	-0.451742						0.0355843		0.0117517	0.0974423	-0.149697	-0.18067				-0.959266		-0.0909911		0.2626					0.121624	-0.455407	-0.0355434
TG-GATES	Rat	Liver	vitro	bolus	TG-Rvitro PRH - acarbose.Middle.8hr	Acarbose	M		8h	-0.0201114	0.0913872		0.00818763	-0.0754667	-0.0211345	-0.300679	-0.0837831	0.0250804	-0.0492629	-0.00531687	0.124091	0.0259354	0.169299	-0.0961563	0.109124			0.0371775	-0.0798931	-0.0131643	0.0390753	-0.0760906	0.0262708	-0.0071302				0.038605		-0.223889		-0.00814955				-0.0763894	-0.0344438	-0.0803894	0.0311267
TG-GATES	Rat	Liver	vitro	bolus	TG-Rvitro PRH - vitamin A.Middle.8hr	Vitamin A	M		8h	0.0239199	0.0914986		0.130713	0.0777066	0.114958	0.0786301	0.12656	0.352047	0.0365314	0.149335	-0.150105	0.0719112	0.17488	-0.0406248	0.332892			0.116813	0.0913137	-0.048901	0.268242	-0.103755	0.119996	0.215216				0.109406		0.00480632		0.0635031				0.0890484	-0.0740875	0.247886	-0.011262
TG-GATES	Rat	Liver	vivo	bolus	TG-RVivoLiverSingle - thioridazine.High.9hr	Thioridazine	H		9h	-0.236068	0.0915747		-0.605016	-0.089518	-0.149626	-0.0112913	-0.390159	0.0423779	-0.00613193	-0.163494		0.296098	0.516684						-7.99287e-05		0.395573	0.0114953	-0.00147356	0.0171866				1.43365		0.206749		0.21989					-0.0774556	0.165772	0.0452919
TG-GATES	Rat	Kidney	vivo	repeat	TG-RVivoKidneyRepeat - carboplatin.Middle.29day	Carboplatin	M		29d	0.0828905	0.0916402	0.219204	0.559526	0.0584526	0.180147	0.159884	-0.0604969	0.143275	-0.0452785	0.00102284	-0.343112	0.0698674	0.0429239		-0.381988			0.128669	-0.119302	-0.0189397	0.192054	-0.155578	0.120742	-0.0594394				0.0095016		-0.187704		0.230183				-0.0291395	0.139294	-0.0331246	0.0872148
TG-GATES	Rat	Liver	vivo	repeat	TG-RVivoLiverRepeat - clofibrate.High.8day	Clofibrate	H		8d	-0.342908	0.0917039		-0.613801	0.0431724	0.20865	-0.134834	0.901768	0.660708	0.356753	-0.377793		2.48956	-0.340588						0.0726365		0.542326	-0.129337	-0.00615701	-0.157959				-0.887164		-0.0569187		2.51483					0.116798	-0.687567	-0.160576
TG-GATES	Rat	Kidney	vivo	bolus	TG-RVivoKidneySingle - desmopressin acetate.Middle.6hr	Desmopressin acetate	M		6h	0.121965	0.0917074	-0.0986702	-0.0291903	-0.00913108	-0.117949	-0.341174	-0.0651741	-0.0563207	0.087197	-0.166028	0.0773704	0.10988	-0.153636		0.250255			0.0366236	-0.040952	0.112176	-0.119327	-0.0144261	0.239419	0.161254				-0.677724		0.044084		-0.0541397				-0.0752194	-0.297024	0.00835709	-0.117213
TG-GATES	Rat	Liver	vivo	bolus	TG-RVivoLiverSingle - iproniazid.Middle.24hr	Iproniazid	M		24h	0.0666952	0.0917703		0.0411212	0.112865	0.250409	-0.0370601	-0.254535	0.0323863	-0.153695	0.0669262		0.0477286	-0.092465						-0.05138		0.632644	-0.200948	0.159212	0.0109418				0.136306		-0.176193		0.61423					0.0503561	-0.216978	0.0342573
TG-GATES	Human	Liver	vitro	bolus	TG-HVitro PHH - interleukin 6, human.High.24hr	IL6	H		24h	0.31364	0.0918404	0.061073	0.151457	0.155009	-0.414681	-0.12053	-0.8937	0.00412574	0.251681	-0.0570178	-0.136621		0.320991	0.147438	0.141601	0.0794852	-0.0909499	0.175673	-0.210751	-1.39037	-0.495086	0.0544676	0.0174752		0.136952	0.99895	-1.0952	-0.210333	-0.061857	-0.124102	0.232983	0.580971	-0.0033425	-0.155203	0.22776	-0.198143	-0.13353		0.118844
TG-GATES	Rat	Liver	vivo	repeat	TG-RVivoLiverRepeat - theophylline.High.8day	Theophylline	H		8d	-0.0895464	0.0918641		0.174465	0.394719	0.0159534	-0.0962766	-0.0840083	0.129534	0.21604	-0.317684		0.320989	0.111658						-0.149087		0.64876	-0.0647745	0.247376	-0.157161				0.175616		-0.413746		2.3749					-0.0860486	0.345969	-0.0139446
TG-GATES	Rat	Liver	vivo	bolus	TG-RVivoLiverSingle - phalloidin.High.3hr	Phalloidin	H		3h	-0.101269	0.0921594		0.282049	0.364654	-0.160627	0.245333	-0.108783	0.0715932	-0.550678	-0.0771854		0.253276	-0.62253						-0.120536		-0.320267	0.159946	-0.46694	0.349602				-0.754825		-0.244307		0.448813					-0.230344	-0.776413	-0.0201702
TG-GATES	Rat	Liver	vitro	bolus	TG-Rvitro PRH - allyl alcohol.High.24hr	Allyl alcohol	H		24h	0.11725	0.0922032		-0.0270863	-0.284161	0.257782	0.00783252	0.259817	0.0241904	0.0660896	-0.0264462	0.0804421	0.0451933	0.0829795	0.0497593	0.288847			-0.0401665	-0.187765	0.0385675	0.0357189	0.59221	-0.095071	-0.102241				0.191371		1.36693		0.280798				0.146375	0.0283923	0.065992	-0.044177
TG-GATES	Rat	Liver	vivo	repeat	TG-RVivoLiverRepeat - iproniazid.Middle.4day	Iproniazid	M		4d	0.0491813	0.0922364		0.137107	0.0961368	-0.0697439	-0.19529	-0.149505	0.18095	-0.141211	-0.0566294		-0.0674277	0.138976						0.00407545		0.612617	0.100958	0.182583	-0.0802308				0.458371		0.0571581		0.589348					0.0462899	-0.341779	0.00468365
TG-GATES	Rat	Liver	vivo	repeat	TG-RVivoLiverRepeat - ethambutol.Middle.8day	Ethambutol	M		8d	0.302839	0.0923412		-0.125014	0.881823	0.755692	0.00992124	-0.795987	-0.0325033	0.101447	-0.237143		1.42116	-0.652258						0.293065		0.167062	0.140713	0.0791073	0.0166083				-0.892211		-0.784759		-0.116641					0.0931302	-0.371483	-0.0065139
TG-GATES	Rat	Kidney	vivo	bolus	TG-RVivoKidneySingle - rifampicin.Middle.24hr	Rifampicin	M		24h	0.0420858	0.0924427	0.0624464	-0.00507467	0.232393	-0.0740163	-0.101643	0.0283804	-0.0279182	0.0241062	0.0403905	-0.271666	0.0948066	0.417056		0.164597			-0.00380259	-0.0450002	0.050709	-0.146429	0.123479	0.20291	0.144627				-0.729786		-0.0349723		0.0861142				-0.0299505	0.122379	0.0680849	0.115374
TG-GATES	Rat	Liver	vivo	repeat	TG-RVivoLiverRepeat - allopurinol.Middle.15day	Allopurinol	M		15d	0.0663592	0.0925644		-0.344144	-0.12559	-0.281063	0.0152645	-0.121705	0.03129	-0.302364	0.0158271		-0.00356728	0.905466						-0.0159841		0.716748	0.182601	-0.180546	0.184616				0.216891		-0.0568642		1.05258					-0.0338432	-0.0577979	-0.011359
TG-GATES	Rat	Liver	vivo	bolus	TG-RVivoLiverSingle - disopyramide.Middle.3hr	Disopyramide	M		3h	-0.0381032	0.0926161		0.0995166	-0.0730262	-0.134193	-0.114115	0.706497	0.0438608	0.395767	0.087297		-0.212653	-0.0691042						-0.0429799		1.05884	0.0783424	-0.221444	0.197767				0.374382		-0.148735		-0.416389					-0.0348957	0.263203	-0.013057
TG-GATES	Rat	Liver	vivo	repeat	TG-RVivoLiverRepeat - tacrine.Low.29day	Tacrine	L		29d	0.0355767	0.0926563		-0.298205	0.107129	0.0409893	-0.0821185	-0.612603	0.00646717	-0.235656	0.0486644		0.0920012	0.292511						-0.144861		0.418897	0.0315835	0.0397498	0.0212477				0.42329		0.155663		1.28656					-0.0749736	-0.123163	-0.0121313
TG-GATES	Rat	Liver	vivo	repeat	TG-RVivoLiverRepeat - vitamin A.Middle.8day	Vitamin A	M		8d	-0.0950982	0.0927119		-0.211967	0.101328	-0.202406	0.122509	0.33611	0.0768631	0.110041	-0.0248828		-0.0968788	0.00135197						-0.0121875		0.143364	0.0688622	0.0794621	-0.0356359				1.21519		-0.392054		-0.175936					0.108378	0.155193	-0.0265714
TG-GATES	Rat	Liver	vivo	bolus	TG-RVivoLiverSingle - cephalothin.High.9hr	Cephalothin	H		9h	0.307345	0.09281		-0.210231	0.0506895	0.782723	0.168353	0.344395	0.127443	-0.264644	-0.0696318		0.168794	0.529416						0.0716289		0.0478021	-0.0426719	0.244546	0.0566211				0.0584085		-0.0897199		0.367531					0.184364	0.0523504	0.000981186
TG-GATES	Human	Liver	vitro	bolus	TG-HVitro PHH - omeprazole.Middle.2hr	Omeprazole	M		2h	-0.0434448	0.0928588	-0.125082	0.0702853	0.090266	0.131282	-0.0456816	-0.0139106	-0.107444	0.0376236	0.0334152	0.192349		0.164629	-0.10369	-0.18106	-0.0189775	0.0174078	-0.0915697	-0.0897606	-0.069093	0.536201	-0.100222	-0.114551		0.0564368	0.0519959	0.0714166	0.0523529	0.0201708	0.106884	-0.0439438	0.117254	-0.191483	-0.115591	0.0109828	0.0485966	-0.00409709		0.0330347
carcinoGENOMICS	Rat	Kidney	vitro	bolus	CX RVitro NRK Nifedipine 6h (35uM)	Nifedipine	IC10	35	6h	0.0608899	0.0929668	0.0639336	-0.0198555	0.174319	0.0439243	-0.0277726	0.0328363	0.0113887	0.011441		-0.0161298	-0.0419602	-0.0196151	0.0756471			-0.126972		-0.0206564		0.336075	-0.0172648	-0.0356791	-0.0793323	-0.00909667		-0.0192575	-0.018718		-0.0157684	0.129121	-0.0150316	-0.0274851		0.0579891	0.00629903	0.0977556	0.00639723	-0.0171786
TG-GATES	Rat	Liver	vivo	repeat	TG-RVivoLiverRepeat - adapin.Low.29day	Adapin	L		29d	-0.233457	0.093066		-0.0278762	0.0672259	-0.0908732	-0.0116562	0.292971	-0.0871886	0.083675	-0.243087		-0.0283566	-0.336213						0.00853717		0.378598	-0.096306	-0.171097	0.0468367				-0.712274		0.105592		-0.670555					-0.0799601	-0.085908	0.0273691
TG-GATES	Rat	Liver	vivo	bolus	TG-RVivoLiverSingle - ethionine.High.6hr	Ethionine	H		6h	-0.219618	0.0931404		-0.20766	0.230385	0.0302328	-0.13223	-0.303325	-0.043978	-0.218874	-0.12471		-0.146317	-0.29017						0.163254		0.0344593	0.0166599	-0.446682	-0.0921908				0.0351398		0.411822		0.370618					0.0684145	0.656168	-0.00727746
TG-GATES	Rat	Liver	vivo	repeat	TG-RVivoLiverRepeat - fenofibrate.High.15day	Fenofibrate	H		15d	0.0528397	0.0933139		-1.22421	0.346153	-0.132179	-0.119246	1.0587	1.28772	0.522791	-0.554278		3.17567	-1.33679						0.101881		-1.03849	-0.123743	0.784645	0.0251259				-2.08439		-0.584188		4.23326					-0.0833327	-1.56198	-0.319293
TG-GATES	Rat	Liver	vivo	bolus	TG-RVivoLiverSingle - methimazole.High.6hr	Methimazole	H		6h	0.203795	0.0933553		-0.379352	0.453768	1.29004	-0.233777	-0.250031	0.418124	-0.129033	-0.103285		0.121377	0.448725						-0.064145		0.154929	0.0211347	0.032646	0.0748989				-0.518268		-0.172426		0.76451					0.1729	-0.141451	-0.0256037
TG-GATES	Rat	Liver	vivo	repeat	TG-RVivoLiverRepeat - rosiglitazone maleate.High.15day	Rosiglitazone	H		15d	0.0726247	0.0933662		-0.0309688	0.183861	-0.242207	-0.185256	0.260906	0.270964	-0.526049	0.0975002		0.867592	1.05571						0.0189616		0.355023	0.195897	-0.117282	-0.138412				0.708962		0.163261		2.10403					0.174509	0.025248	-0.0868429
TG-GATES	Rat	Liver	vivo	repeat	TG-RVivoLiverRepeat - amiodarone.Middle.15day	Amiodarone	M		15d	0.0585344	0.0934593		0.0552732	-0.0791624	0.137644	-0.0891259	0.647423	0.0150118	0.121728	-0.111225		0.0718095	-0.639534						0.0219817		-0.185707	0.0475791	-0.228457	0.169644				-0.737225		-0.05099		1.23411					-0.13089	-0.356511	-0.022571
TG-GATES	Rat	Liver	vivo	repeat	TG-RVivoLiverRepeat - allyl alcohol.High.4day	Allyl alcohol	H		4d	-0.0756895	0.0934828		0.0852999	0.285768	-0.649258	-0.205276	0.283649	0.0169415	-0.949542	0.0471492		0.721143	0.760525						0.00704046		0.551245	0.0975921	0.004154	0.11146				-0.258047		0.0311955		1.87954					0.167409	0.108117	-0.0191497
TG-GATES	Rat	Liver	vivo	repeat	TG-RVivoLiverRepeat - rifampicin.High.4day	Rifampicin	H		4d	-0.114327	0.0935033		0.228753	0.421867	-0.150165	0.0733484	-0.455759	-0.0823777	-0.487597	-0.124677		0.103458	-0.441803						-0.11083		0.614832	-0.0588066	0.0836759	-0.140248				0.427051		-0.111015		1.52281					0.0299032	0.322369	-0.0696676
TG-GATES	Human	Liver	vitro	bolus	TG-HVitro PHH - chlormezanone.Middle.8hr	Chlormezanone	M		8h	0.0312177	0.093629	-0.0234984	0.0259507	0.038226	-0.0449465	0.040691	-0.0112661	0.125212	0.122674	-0.154078	-0.140575		0.0220901	0.0149722	-0.0567947	-0.0598111	-0.0595674	-0.135163	0.0396117	-0.0311988	-0.0587128	-0.0628561	0.0478143		0.126109	0.208934	0.169723	0.0632756	-0.00110488	0.0473928	0.0365776	0.0400022	-0.00920853	0.0406008	-0.0589111	-0.0593626	0.0527763		-0.0364629
TG-GATES	Rat	Kidney	vivo	repeat	TG-RVivoKidneyRepeat - cisplatin.Low.15day	Cisplatin	L		15d	0.150574	0.0936584	0.213249	0.233047	-0.0836929	0.200978	0.0697048	-0.00297387	0.0488673	-0.165524	0.13623	0.242161	0.0117691	0.513339		0.0764521			-0.0162048	-0.110578	0.0832304	0.43121	0.0936559	-0.308084	0.136708				-0.997495		-0.0771733		0.245774				0.0610087	-0.117328	0.0414118	-0.216001
TG-GATES	Rat	Liver	vitro	bolus	TG-Rvitro PRH - methyltestosterone.Low.8hr	Methyltestosterone	L		8h	0.0486334	0.0936866		0.173071	0.0554718	0.012188	-0.000439532	0.0797227	-0.00165256	-0.00853444	-0.0366669	-0.0311194	0.00124747	0.123095	-0.0328748	-0.0439206			-0.000436671	-0.0993868	0.130882	-0.0227328	0.016652	-0.0554419	-0.0437559				0.201455		0.0506216		0.153497				0.00346456	0.0178168	0.0366854	-0.0229014
TG-GATES	Rat	Liver	vivo	bolus	TG-RVivoLiverSingle - puromycin aminonucleoside.High.9hr	Puromycin	H		9h	-0.313604	0.0937228		-1.55995	0.0420438	0.0478464	0.059653	0.620862	0.424196	-0.790941	0.267802		0.525236	-0.591819						-0.0903873		-0.14254	0.131295	0.106169	-0.324545				-0.600338		-0.109952		0.580351					0.125491	-0.101297	0.00536697
TG-GATES	Rat	Liver	vitro	bolus	TG-Rvitro PRH - triazolam.Low.2hr	Triazolam	L		2h	-0.0328303	0.0938262		0.0312104	-0.203005	-0.103732	-0.0657499	-0.0303251	-0.0245991	-0.0081039	-0.0111798	0.0721918	0.00372729	0.202281	-0.0216444	-0.0916977			0.0337928	0.0436563	-0.0852932	0.0740572	0.00180589	-0.106153	0.158798				-0.00262712		0.190175		0.0846907				-0.132255	-0.0507609	0.0644064	0.0261507
TG-GATES	Human	Liver	vitro	bolus	TG-HVitro PHH - thioacetamide.High.8hr	Thioacetamide	H		8h	0.021032	0.0939139	-0.0929887	-0.0420021	-0.0960368	-0.01702	0.118868	0.0809799	0.0831917	-0.0869432	-0.013883	0.021959		0.0209784	0.0378329	0.0597552	0.173548	-0.0181968	-0.084451	0.103001	-0.112357	0.296899	-0.0738071	-0.00313934		0.0980722	0.176933	-0.00388399	0.0775501	0.0191512	0.040567	-0.116867	-0.0847345	-0.231621	0.0694074	0.10864	-0.12515	0.00551446		-0.0258898
TG-GATES	Rat	Liver	vivo	repeat	TG-RVivoLiverRepeat - theophylline.Low.4day	Theophylline	L		4d	-0.0453577	0.0939551		-0.00911506	-0.0151484	-0.102152	-0.222929	0.160146	-0.0404227	-0.322621	0.0177561		-0.00774547	-0.100014						-0.0833113		-0.195869	0.0344354	-0.0499328	-0.120642				-0.0637452		-0.0444714		0.770612					-0.0436369	-0.1798	-0.00471994
TG-GATES	Rat	Liver	vivo	bolus	TG-RVivoLiverSingle - nimesulide.High.3hr	Nimesulide	H		3h	-0.094224	0.0940708		-0.00592902	-0.0659351	-0.461566	-0.268911	-0.430762	-0.199104	0.0287319	0.0552681		-0.130169	0.610702						-0.0571049		1.24173	-0.0426109	-0.230366	0.255977				-0.135582		0.064836		-0.144839					-0.216742	0.0737349	-0.00189143
carcinoGENOMICS	Rat	Kidney	vitro	bolus	CX RVitro NRK Nifedipine 24h (35uM)	Nifedipine	IC10	35	24h	0.00689897	0.0941432	0.0206287	-0.00781731	-0.0012885	0.0378315	-0.180552	0.0568347	0.0157758	0.0286215		-0.00409934	-0.124017	-0.00615476	-0.00122372			-0.00451536		0.123789		-0.335975	-0.00227147	0.0257742	-0.0317821	-0.0683123		-0.0044517	-0.00506263		-0.00398405	0.0197807	-0.00326636	-0.00496928		-0.0540605	0.0417263	0.0625309	0.0373352	-0.00214896
TG-GATES	Rat	Liver	vivo	repeat	TG-RVivoLiverRepeat - sulpiride.High.8day	Sulpiride	H		8d	-0.120046	0.0941939		0.166456	-0.0676054	-0.165417	-0.0424255	-0.398771	0.0585711	0.107652	-0.0823817		-0.198233	-0.131199						-0.00987175		0.346762	0.0250225	-0.0476665	0.0311575				0.227199		0.0911395		-0.873514					0.131056	-0.118956	0.0864035
TG-GATES	Rat	Liver	vitro	bolus	TG-Rvitro PRH - LPS.Low.2hr	LPS	L		2h	0.175132	0.094272		-0.0284504	0.0060636	0.0869371	0.0490827	0.116307	0.168986	-0.0872236	0.00165014	-0.022143	0.0768196	-0.397999	0.0337032	0.0219955			0.162826	-0.0763144	0.0666745	0.206297	0.106648	-0.0788559	0.0745228				-0.369004		-0.0573238		-0.145709				-0.0124857	0.03355	-0.128503	-0.0435672
TG-GATES	Rat	Liver	vivo	repeat	TG-RVivoLiverRepeat - propranolol.Middle.15day	Propranolol	M		15d	0.0327919	0.0942829		0.111936	0.963297	-0.165174	0.0427533	-0.718428	-0.105784	-0.215094	0.0747075		0.337523	0.60971						0.102075		0.155574	-0.0148986	0.0374522	-0.0953457				0.105238		-0.677302		1.39561					0.233459	0.294782	-0.0143862
TG-GATES	Rat	Liver	vivo	repeat	TG-RVivoLiverRepeat - desmopressin acetate.Low.4day	Desmopressin acetate	L		4d	-0.18416	0.094312		-0.173943	-0.129957	-0.214555	-0.0138764	-0.06576	0.0966407	-0.382506	-0.0278441		0.0585734	-0.227279						-0.052853		0.126214	-0.0819757	-0.0914538	0.149313				0.150518		-0.373765		0.663147					0.063949	0.0434895	0.00435985
TG-GATES	Rat	Liver	vitro	bolus	TG-Rvitro PRH - azathioprine.Low.24hr	Azathioprine	L		24h	-0.0255979	0.0943746		0.112768	0.0043773	0.0897282	-0.0930599	0.0703499	0.0795548	0.113463	-0.0511635	0.0609571	0.00153846	0.0737619	0.0198101	0.0122901			0.000926167	-0.0460679	-0.0382274	0.221608	-0.0780051	0.0975009	-0.0847547				-0.0635263		0.09912		0.0283176				0.0650451	-0.00702682	-0.0327892	-0.0242452
TG-GATES	Rat	Liver	vivo	bolus	TG-RVivoLiverSingle - tacrine.Middle.3hr	Tacrine	M		3h	-0.0751245	0.0943876		0.0392518	-0.00766694	-0.0285974	-0.258529	-0.0454091	-0.0488793	0.0405505	0.0575537		0.147741	0.230904						-0.0848637		0.177749	-0.0474604	-0.12944	0.213104				0.0793454		-0.143679		0.540683					-0.145498	-0.387876	0.0142591
TG-GATES	Rat	Liver	vitro	bolus	TG-Rvitro PRH - carbamazepine.Low.8hr	Carbamazepine	L		8h	0.0741116	0.0944885		0.085693	0.00945096	0.00433638	-0.0180058	-0.014298	-0.056581	0.129359	-0.0068165	-0.0766293	0.0619269	0.129401	0.00865623	-0.080129			0.0384602	0.0353899	0.0215238	-0.0124989	0.0364311	-0.0497624	-0.00400624				-0.133191		-0.163681		-0.071361				-0.093157	-0.0767932	-0.0169297	0.020767
TG-GATES	Rat	Liver	vivo	bolus	TG-RVivoLiverSingle - ketoconazole.Low.24hr	Ketoconazole	L		24h	0.0202198	0.0946425		0.102679	0.166207	-0.186538	-0.0355117	-0.0609706	-0.00818187	-0.123826	-0.0971281		0.000800606	-0.577328						-0.203963		0.481251	0.0623214	-0.0973499	-0.0518296				0.708454		0.0245554		0.181821					0.0998205	0.156131	0.0200791
TG-GATES	Rat	Liver	vivo	repeat	TG-RVivoLiverRepeat - propranolol.Low.8day	Propranolol	L		8d	-0.0870009	0.0946482		-0.36207	0.0503997	-0.299367	-0.242691	-0.26835	0.0501577	-0.104431	0.0365477		-0.0345395	-0.529214						0.0282216		-0.353147	-0.0351949	-0.0599582	-0.11093				-1.21235		0.064248		1.11905					-0.00739482	0.150555	-0.029617
TG-GATES	Rat	Liver	vivo	bolus	TG-RVivoLiverSingle - theophylline.Low.24hr	Theophylline	L		24h	0.0453824	0.0946751		0.185085	-0.0421559	-0.212201	-0.0869955	0.201077	-0.0756507	-0.0991142	0.0643645		0.0161404	0.118196						-0.0310703		0.0236901	0.0709278	-0.0240743	-0.191517				-0.428256		0.437949		0.0341675					0.153175	0.0223984	0.0195067
TG-GATES	Rat	Kidney	vivo	repeat	TG-RVivoKidneyRepeat - cyclosporine A.Middle.29day	Cyclosporine A	M		29d	0.0486327	0.0947759	0.173016	0.0833351	0.0965366	-0.161903	0.20785	-0.0852791	0.037258	0.0577444	-0.0885416	0.164346	0.203179	-0.0256646		-0.120399			-0.135065	0.0985233	-0.0740616	-0.48877	0.0208524	0.0213719	-0.384601				-0.904281		0.0931794		0.103252				-0.045457	-0.453256	0.15045	0.201384
TG-GATES	Rat	Liver	vivo	repeat	TG-RVivoLiverRepeat - nimesulide.Low.8day	Nimesulide	L		8d	-0.0488434	0.0948491		-0.117934	-0.0551999	0.197605	-0.024297	0.0162988	0.0430052	-0.190568	0.135611		-0.0924511	0.787538						-0.0487307		-0.0237242	0.101513	-0.199836	-0.0403433				-0.783288		0.0851495		0.500853					-0.155219	-0.0217021	0.0402688
TG-GATES	Rat	Liver	vivo	bolus	TG-RVivoLiverSingle - indomethacin.Low.3hr	Indomethacin	L		3h	0.144701	0.0949283		-0.172028	0.135902	-0.0295008	0.180908	0.0514203	0.00789534	-0.0598571	0.13487		-0.0717855	0.196649						-0.015753		0.45522	-0.156588	-0.152711	0.0376293				-1.45795		-0.117562		0.132109					-0.111676	-0.10532	-0.0240302
TG-GATES	Rat	Liver	vivo	bolus	TG-RVivoLiverSingle - carboplatin.High.24hr	Carboplatin	H		24h	-0.109307	0.0949734		-0.0857452	-0.0383405	-0.49865	0.108088	-0.723884	0.0782863	-0.508674	-0.0765177		-0.152514	-0.400995						-0.285086		0.410726	-0.0407554	-0.0225837	-0.245349				-0.692222		-0.0238123		0.574709					0.150505	0.438319	-0.017189
TG-GATES	Rat	Liver	vivo	bolus	TG-RVivoLiverSingle - carbon tetrachloride.Middle.24hr	Carbon tetrachloride	M		24h	0.0319568	0.0950546		-0.286768	0.384306	0.0236844	-0.197789	-0.0412102	0.0604863	-0.121402	0.147854		0.673463	-0.367597						0.119999		-0.0865741	0.0941043	-0.114112	-0.125432				-0.817842		-0.237616		-0.188937					0.125132	-0.371919	0.00498335
TG-GATES	Rat	Liver	vivo	repeat	TG-RVivoLiverRepeat - diazepam.Low.4day	Diazepam	L		4d	0.0500991	0.0951124		-0.0804238	0.408166	-0.47751	-0.148602	-0.663581	0.0432027	-0.294953	0.0270172		-0.0383848	0.812013						-0.126856		-0.00292969	0.00494856	0.0354251	-0.0269584				0.389942		-0.101552		0.55001					0.0523052	0.0541725	-0.00461261
TG-GATES	Rat	Liver	vivo	bolus	TG-RVivoLiverSingle - bromobenzene.Middle.3hr	Bromobenzene	M		3h	0.0237587	0.0951573		0.0980995	0.0556962	-0.12089	0.0330151	0.0350891	0.0112052	0.237062	-0.00891081		0.0958221	0.574372						0.023851		0.543977	0.0259018	0.136837	0.0119082				0.18769		0.236186		0.20687					-0.0235697	-0.0304737	0.00350015
TG-GATES	Rat	Liver	vivo	bolus	TG-RVivoLiverSingle - allyl alcohol.Middle.3hr	Allyl alcohol	M		3h	-0.164242	0.0951978		-0.153358	-0.1528	-0.361759	-0.0585529	0.704296	-0.0516073	-0.194228	-0.0491329		0.0060366	0.134277						0.0468664		0.306201	-0.0218628	-0.112064	-0.0894902				0.0839811		0.0686242		-0.58642					-0.0805857	0.314292	0.00948462
TG-GATES	Human	Liver	vitro	bolus	TG-HVitro PHH - acarbose.Middle.8hr	Acarbose	M		8h	0.0537998	0.0952509	-0.0536105	0.083023	-0.0680927	-0.0193196	0.018274	0.016347	0.0435274	-0.220214	-0.0434119	-0.0759627		-0.0150788	0.282896	0.108471	0.0177806	0.013716	0.147552	-0.0100743	0.129922	0.0431308	0.29156	0.0377933		-0.101515	-0.00867418	-0.0472986	0.0157208	0.0630522	0.0181904	-0.00897382	0.156478	0.104046	-0.0540737	0.0157292	-0.071605	0.0215432		0.0738087
TG-GATES	Rat	Liver	vivo	repeat	TG-RVivoLiverRepeat - tolbutamide.High.15day	Tolbutamide	H		15d	0.11096	0.0953889		-0.0380749	1.26914	0.233423	0.117691	0.281228	0.134127	0.376208	-0.0103849		-0.238106	-0.0539896						0.00563006		0.31517	0.0692782	-0.070718	0.0575651				-0.416326		0.0874797		0.976426					-0.000287534	0.0367308	-0.0338194
TG-GATES	Rat	Kidney	vivo	repeat	TG-RVivoKidneyRepeat - carboplatin.High.4day	Carboplatin	H		4d	0.0463491	0.0954004	0.0502843	0.27511	0.0265947	-0.160839	-0.004804	-0.180414	0.0864063	0.252362	-0.0611401	-0.0291378	0.0959912	0.156329		-0.37334			-0.0540459	-0.0157601	-0.0168762	0.235303	0.0698133	0.1351	-0.135772				0.175291		0.132648		-0.00224512				0.0890172	0.0186676	-0.144683	0.0730486
TG-GATES	Rat	Liver	vivo	repeat	TG-RVivoLiverRepeat - vitamin A.High.29day	Vitamin A	H		29d	-0.135364	0.0956215		-1.74903	0.806083	-0.248704	0.0637752	-0.511286	0.408232	0.140832	0.116119		-0.0339973	-0.91354						-0.122839		0.254636	0.0572321	0.135526	0.747993				-1.50439		-2.65627		-0.0738038					-0.147422	1.11656	-0.059855
carcinoGENOMICS	Rat	Kidney	vitro	bolus	CX RVitro NRK Benzo(a)pyrene 6h (40uM)	Benzo(a)pyrene	IC10	40	6h	-0.00941232	0.0956488	-0.00390941	0.0208574	0.0167116	0.0140659	-0.241608	0.0895481	-0.0380457	-0.0154226		0.0188993	-0.0148573	0.0207341	-0.0450241			0.0155908		-0.0797517		0.0999404	0.0156367	-0.00302402	0.17932	0.0292804		0.0186108	0.0211632		0.018335	0.0388221	0.0177108	0.0181546		-0.0207556	-0.0479458	-0.0840316	-0.03367	0.0173264
TG-GATES	Human	Liver	vitro	bolus	TG-HVitro PHH - diclofenac.Low.2hr	Diclofenac	L		2h	-0.0326332	0.0957029	0.482538	0.0258623	0.0611554	0.100409	0.0740939	0.175751	-0.106007	-0.0217555	0.0560694	0.0666687		0.00464874	-0.0633365	0.0290491	0.225055	-0.0999954	-0.0173968	0.0621204	-0.0518242	0.0519601	-0.0699394	0.0188189		-0.0318203	0.0452099	0.036345	0.179103	0.0445801	0.0878361	-0.00263243	0.128533	0.00468718	0.0383143	0.0646461	0.0228273	-0.0229998		0.00682515
TG-GATES	Rat	Liver	vitro	bolus	TG-Rvitro PRH - bucetin.Middle.8hr	Bucetin	M		8h	0.0698866	0.0957101		0.0788653	0.146231	-0.213416	-0.146625	-0.108486	0.0255063	-0.0141551	0.102293	0.140892	0.0921019	0.0910213	-0.106318	0.19196			0.0118425	-0.0363223	-0.016036	-0.0908525	-0.185681	-0.234571	0.051437				0.263303		-0.254089		-0.0722186				0.0861228	-0.0617081	0.0563596	0.0102333
TG-GATES	Rat	Liver	vivo	repeat	TG-RVivoLiverRepeat - tiopronin.High.15day	Tiopronin	H		15d	-0.000519957	0.0957355		-0.0234043	-0.125971	-0.0106551	-0.157642	0.183976	0.130965	-0.18063	0.187814		0.330587	0.0111638						-0.104482		-0.223081	-0.0397227	-0.28977	-0.0794781				0.638051		-0.0643347		1.20066					0.0160026	0.282709	-0.015886
TG-GATES	Human	Liver	vitro	bolus	TG-HVitro PHH - butylated hydroxyanisole.Low.8hr	Butylated hydroxyanisole	L		8h	0.165465	0.0957575	0.119464	0.239161	0.011004	-0.0272935	0.112566	0.197974	0.279861	-0.0140383	0.0458952	-0.143794		0.186359	-0.151489	0.00943214	-0.014998	0.0341865	0.12535	-0.07786	0.184449	-0.391326	0.16168	0.228033		-0.155939	-0.00398786	0.324302	0.0254732	0.0321095	-0.00777864	0.0709777	-0.0237042	-0.170758	0.0459261	0.0804668	-0.176892	0.0634649		0.0312552
TG-GATES	Rat	Liver	vivo	repeat	TG-RVivoLiverRepeat - triamterene.Middle.15day	Triamterene	M		15d	-0.000656716	0.095761		-0.0471489	-0.0706726	-0.0245296	0.197155	0.116854	0.0735075	-0.226883	-0.223448		0.0366894	-0.090748						-0.0969634		-0.535479	-0.0278938	-0.182562	-0.138474				0.57806		0.267576		1.17988					0.0949949	0.00574703	-0.0616415
TG-GATES	Rat	Liver	vivo	repeat	TG-RVivoLiverRepeat - bromoethylamine.Low.29day	Bromoethylamine	L		29d	-0.221898	0.095943		-0.0592573	-0.0973537	-0.215628	-0.0603848	0.282711	0.0053787	-0.274727	0.0849904		0.109023	0.391985						0.130191		-0.373423	0.0423451	-0.311496	-0.00956012				-0.532573		-0.0721115		-0.509457					0.146592	-0.22528	0.0427925
carcinoGENOMICS	Rat	Kidney	vitro	bolus	CX RVitro NRK Diclofenac sodium 6h (6uM)	Diclofenac	IC10	6	6h	0.0301526	0.0959854	0.0747756	-0.0349287	0.211234	0.0245855	-0.0300787	-0.0133242	0.0305843	0.0266014		-0.0276681	-0.00580889	-0.0328067	0.0756			-0.0213552		0.200978		-0.0419497	-0.0298622	-0.0198822	-0.0224674	-0.175966		-0.0321055	-0.0315913		-0.0295264	0.0642719	-0.0297182	-0.0446131		0.013068	-0.0253657	0.0845672	0.0259322	-0.0349157
TG-GATES	Human	Liver	vitro	bolus	TG-HVitro PHH - methyltestosterone.Middle.24hr	Methyltestosterone	M		24h	0.0208694	0.0961252	-0.247998	0.0233962	0.0220513	-0.102713	-0.126371	-0.102972	-0.0363879	0.0573425	0.0467244	-0.118383		-0.00982397	-0.0965351	0.0754939	-0.0805742	-0.0135737	-0.15749	0.0102744	-0.0971698	-0.0571833	0.105143	0.0295305		-0.25344	0.219605	-0.543756	0.0321688	0.00475517	-0.101018	0.00468559	-0.287174	-0.12281	-0.144093	0.0811017	-0.0228199	0.00843559		-0.0489532
TG-GATES	Rat	Liver	vivo	repeat	TG-RVivoLiverRepeat - acarbose.High.29day	Acarbose	H		29d	0.00510776	0.0963625		-0.311389	0.0358738	-0.18435	0.0921577	-0.0347077	-0.0101484	-0.00884129	-0.0567895		-0.0819478	-0.349075						-0.0733757		-0.697608	-0.0821106	-0.26804	-0.160075				0.345703		0.0456672		-0.118466					-0.0472869	0.079047	-0.00518873
TG-GATES	Rat	Liver	vivo	bolus	TG-RVivoLiverSingle - disulfiram.High.3hr	Disulfiram	H		3h	-0.112048	0.0964083		0.168458	-0.276848	-0.169666	-0.0868788	0.195853	-0.0560559	0.413502	-0.0614307		-0.0327457	-0.444045						0.0284381		0.306536	0.133853	0.00351338	-0.163283				-0.216114		-0.111464		0.0697537					0.152631	0.179099	0.00756764
TG-GATES	Rat	Liver	vitro	bolus	TG-Rvitro PRH - tiopronin.Low.8hr	Tiopronin	L		8h	0.0272696	0.0964272		-0.0170107	-0.192578	0.0624743	-0.180192	-0.120206	0.00955954	0.0109844	0.0851597	-0.00159397	-0.0377184	0.0934435	-0.105859	0.172896			-0.0483309	-0.0521824	0.00572826	-0.136013	0.262041	0.0619325	-0.0599567				0.11893		0.00324301		0.0886113				0.0333955	-0.144211	0.053779	0.035302
TG-GATES	Rat	Liver	vivo	bolus	TG-RVivoLiverSingle - ciprofloxacin.High.6hr	Ciprofloxacin	H		6h	-0.368647	0.0964792		0.143167	-0.550923	-0.113727	0.0595092	-0.0966691	0.0795109	0.01251	0.211635		0.103925	0.359303						-0.118207		-0.175538	-0.0375173	0.0599886	-0.0314688				-0.614138		0.166047		0.102757					0.0790769	0.290808	0.0161563
TG-GATES	Rat	Liver	vivo	bolus	TG-RVivoLiverSingle - tetracycline.Middle.24hr	Tetracycline	M		24h	0.0813144	0.0967383		0.305855	0.29292	0.419468	-0.215145	0.0122568	0.0384927	-0.567782	-0.02408		0.0483602	0.360332						-0.0308695		0.176212	-0.141685	-0.0333405	-0.101425				-0.407892		0.104608		0.106236					-0.0366442	0.0639289	0.0108277
TG-GATES	Rat	Liver	vivo	bolus	TG-RVivoLiverSingle - lomustine.High.9hr	Lomustine	H		9h	-0.241735	0.0967529		-0.420197	-0.292721	-0.167198	-0.0179879	0.628176	0.117054	-0.539814	0.152767		-0.202648	-0.576952						-0.297061		-0.469786	0.0538153	0.158097	-0.0216975				-1.14986		0.32825		-0.431651					0.0117734	0.154119	-0.028645
TG-GATES	Rat	Liver	vivo	repeat	TG-RVivoLiverRepeat - nifedipine.Low.29day	Nifedipine	L		29d	0.161627	0.0968194		0.155456	0.469611	-0.100285	0.0799295	-0.268365	0.127075	-0.30374	0.0097011		-0.160126	-0.0411028						-0.0223155		0.175207	0.107022	0.122089	0.0113609				-0.321894		0.0341556		2.16318					0.129847	0.301685	-0.0249946
TG-GATES	Rat	Liver	vivo	bolus	TG-RVivoLiverSingle - rosiglitazone maleate.High.6hr	Rosiglitazone	H		6h	-0.286029	0.0968604		-0.417533	0.620962	-0.0285512	0.0598482	-0.457392	0.0272737	-0.674967	0.109801		1.3813	-0.625821						-0.091519		0.828008	-0.0137641	0.00172678	0.116899				0.626143		-0.261305		1.0016					-0.145589	0.211509	-0.0321314
TG-GATES	Rat	Liver	vitro	bolus	TG-Rvitro PRH - vitamin A.High.24hr	Vitamin A	H		24h	-0.104785	0.0968756		0.189833	-0.0281601	0.190214	-0.0381619	-0.126736	0.158892	-0.0384931	0.043598	-0.129561	-0.0157764	0.446672	0.0832251	-0.0453498			0.18445	0.112571	-0.08175	-0.169784	-0.0166554	0.23332	-0.0166788				0.0968945		-0.600792		0.232163				-0.021748	0.132315	0.103955	-0.0242257
TG-GATES	Rat	Liver	vivo	repeat	TG-RVivoLiverRepeat - ajmaline.High.8day	Ajmaline	H		8d	-0.0305143	0.0970118		0.353001	0.906593	-0.169429	-0.0163368	0.380765	0.0402421	-0.413915	0.0735845		0.00427385	0.065743						-0.344742		-0.691286	-0.0144089	-0.174754	-0.32402				-0.545215		-0.0356872		2.30992					-0.255396	-0.111856	0.00168824
TG-GATES	Rat	Liver	vivo	repeat	TG-RVivoLiverRepeat - pemoline.Low.15day	Pemoline	L		15d	-0.0227085	0.0970125		0.139213	0.242776	0.13498	0.0457916	-0.424714	-0.108197	-0.527497	-0.165202		0.102277	0.0759583						0.141434		0.2888	0.107698	-0.0476806	-0.0237058				-0.670451		-0.0430092		1.13895					-0.0339563	-0.297056	0.0203831
TG-GATES	Rat	Liver	vivo	repeat	TG-RVivoLiverRepeat - ticlopidine.Middle.8day	Ticlopidine	M		8d	-0.234206	0.0970843		-0.1618	1.0738	-0.0789901	-0.0692229	0.0281762	0.0692434	-0.620467	0.012209		0.171338	-0.656753						-0.0492991		0.0307387	-0.0121076	0.20602	0.0278303				0.840553		-0.0173454		2.07852					-0.133204	-0.318657	-0.0105488
TG-GATES	Rat	Kidney	vivo	repeat	TG-RVivoKidneyRepeat - rifampicin.Low.29day	Rifampicin	L		29d	-0.11181	0.0970876	0.068624	-0.0477327	-0.225944	-0.031515	0.313541	0.020118	-0.0318571	-0.0548726	0.00382625	-0.060884	0.0931322	-0.168965		0.183862			0.096466	0.0818307	-0.0459441	-0.142625	-0.188268	-0.00947379	-0.128458				1.25599		0.00745555		0.0410588				-0.0308832	-0.053018	0.0644069	-0.0583979
TG-GATES	Rat	Liver	vitro	bolus	TG-Rvitro PRH - allopurinol.Middle.8hr	Allopurinol	M		8h	0.0227681	0.0970889		0.132849	-0.0376674	0.0440764	0.0641924	0.0862478	0.109849	-0.0440613	0.0733777	-0.0755468	0.042247	-0.201359	-0.123183	-0.0871932			0.0952493	-0.267944	0.00389663	-0.142671	-0.0891284	0.0318766	0.0704601				0.0695536		-0.0804394		-0.0505706				0.0368942	0.119125	-0.00304202	0.0394558
TG-GATES	Rat	Liver	vivo	bolus	TG-RVivoLiverSingle - rotenone.Low.3hr	Rotenone	L		3h	-0.0342552	0.0971004		0.0790507	0.356952	-0.126971	0.11292	0.0522115	0.00917896	0.142663	0.0292114		0.121134	-0.389943						-0.00496859		0.66458	0.0607581	0.0680832	0.123955				-1.82195		-0.015801		0.937344					-0.0844501	0.628311	0.00452774
TG-GATES	Rat	Liver	vivo	bolus	TG-RVivoLiverSingle - enalapril.Middle.3hr	Enalapril	M		3h	0.0161575	0.0973378		0.0279045	-0.251921	-0.142953	-0.0173244	-0.316476	0.0748404	0.0216218	0.0317111		-0.0578789	-0.405716						-0.0553756		-0.388436	-0.0949551	-0.0237416	0.124228				-1.15766		-0.00941107		-0.271803					-0.139764	0.281523	0.0355721
TG-GATES	Rat	Kidney	vivo	repeat	TG-RVivoKidneyRepeat - clofibrate.Low.4day	Clofibrate	L		4d	-0.014371	0.097339	-0.01984	0.29616	0.0507722	-0.103644	-0.0692921	0.0601297	0.0561563	0.128592	-0.00445578	0.0164586	0.306054	0.579732		-0.274987			0.0710792	0.0323222	0.0784056	0.103248	-0.131066	0.293896	-0.108853				-0.430577		-0.0697988		0.211911				-0.0162283	0.0632142	-0.0132882	0.0941
TG-GATES	Rat	Liver	vivo	bolus	TG-RVivoLiverSingle - thioridazine.High.3hr	Thioridazine	H		3h	-0.135053	0.0973786		-0.464235	0.331862	-0.234874	0.147582	0.183638	0.0559984	-0.00390349	-0.0720505		0.119875	-0.196545						-0.0592516		0.313464	0.0590112	-0.152063	0.00636969				-0.67797		-0.405195		0.755653					0.0383815	0.259626	0.0167456
TG-GATES	Rat	Liver	vivo	repeat	TG-RVivoLiverRepeat - fluoxetine hydrochloride.Low.15day	Fluoxetine	L		15d	-0.170108	0.0974234		0.232735	0.0713775	-0.267766	0.0162096	-0.345719	0.00362666	0.0803763	-0.0441121		0.0626017	0.0370338						-0.0583606		0.431093	0.135864	0.0625986	-0.102573				0.926347		0.0114157		-0.35647					-0.102043	0.164375	-0.0298138
TG-GATES	Human	Liver	vitro	bolus	TG-HVitro PHH - naphthyl isothiocyanate.Middle.8hr	Naphthyl isothiocyanate	M		8h	0.0525052	0.0975056	-0.201773	0.0534819	0.0186191	0.0274871	-0.106269	0.0847612	-0.021881	0.283981	0.149631	-0.00338742		0.0690861	-0.253338	-0.121992	-0.169691	0.229977	-0.0899473	0.0835837	0.156909	-0.23663	-0.180127	0.0889978		-0.0518643	-0.0228403	0.178121	-0.057692	-0.0349713	-0.05188	0.137435	-0.197731	0.0599485	-0.018901	0.0892408	-0.0548341	0.0796894		0.0245658
TG-GATES	Rat	Liver	vivo	bolus	TG-RVivoLiverSingle - acetazolamide.High.24hr	Acetazolamide	H		24h	-0.124331	0.0976402		-0.587161	0.352085	-0.268907	0.136039	-0.440556	0.0411231	-0.477875	0.197923		-0.0239263	0.270831						0.0584177		0.612698	0.0452424	0.354453	-0.143795				0.0271246		-0.0822851		-0.649385					0.188827	0.335272	-0.0160825
TG-GATES	Rat	Liver	vivo	bolus	TG-RVivoLiverSingle - nitrofurantoin.Low.3hr	Nitrofurantoin	L		3h	-0.121566	0.0977434		-0.356275	0.333107	-0.291184	-0.0267204	0.176424	0.0821459	-0.444135	-0.00208692		0.452489	-0.0532305						0.0530921		0.185432	-0.0548963	-0.0690756	0.0683698				0.61389		-0.380252		0.473928					0.16348	0.381565	0.0100897
TG-GATES	Rat	Liver	vivo	bolus	TG-RVivoLiverSingle - ketoconazole.Middle.9hr	Ketoconazole	M		9h	0.163949	0.0977832		-0.0919425	0.0539665	0.0942863	-0.14723	0.0137993	-0.0496962	-0.442609	-0.113025		-0.128921	0.298843						0.0755841		0.0836663	-0.13481	0.164987	-0.0353043				-0.277663		-0.36472		0.502436					-0.0749815	-0.0408599	-0.0262306
TG-GATES	Rat	Liver	vivo	repeat	TG-RVivoLiverRepeat - pemoline.High.4day	Pemoline	H		4d	-0.0839899	0.097835		-0.641855	0.172921	-0.0771323	0.238812	-0.588682	-0.0173031	-0.196212	-0.0545054		-0.0805956	0.31019						0.0527892		0.0853404	-0.18031	0.0354231	0.0364444				-1.11862		-0.203436		0.387636					0.0543254	-0.0822382	-0.0619097
TG-GATES	Rat	Liver	vitro	bolus	TG-Rvitro PRH - etoposide.Middle.8hr	Etoposide	M		8h	-0.035802	0.0981107		-0.0527194	0.160845	0.0302197	-0.249313	0.320253	0.57499	-0.0600238	0.236279	-0.0602139	-0.0397374	0.359698	-0.284676	0.16506			0.0299505	-0.417316	0.260961	0.452827	-0.0231655	-0.079975	-0.165889				0.159733		0.12851		0.56304				0.226523	0.0981618	0.17773	0.019924
TG-GATES	Rat	Liver	vivo	bolus	TG-RVivoLiverSingle - tolbutamide.High.3hr	Tolbutamide	H		3h	0.0806065	0.0981118		0.0292634	0.641478	-0.187737	0.21885	-0.142424	-0.0810692	0.212542	-0.110758		0.0506363	-0.204448						-0.0647512		0.906906	0.265099	-0.0514914	0.19857				-0.0982536		-0.237848		0.34382					0.10412	-0.226976	0.0577993
TG-GATES	Human	Liver	vitro	bolus	TG-HVitro PHH - coumarin.Middle.8hr	Coumarin	M		8h	0.111632	0.0981543	-0.0577859	0.0783525	0.0572696	0.0653987	-0.00627992	0.315831	0.0888143	-0.0508766	0.135835	-0.0727898		0.061665	-0.320676	-0.168127	-0.0566607	0.0131403	0.0663851	0.155614	0.164714	-0.125502	0.043289	0.0175192		-0.129069	0.0846553	0.388192	0.0268688	0.0842582	0.0571666	0.118588	-0.114857	-0.134454	0.0573237	-0.014416	-0.0704422	0.029592		0.0765615
TG-GATES	Rat	Liver	vitro	bolus	TG-Rvitro PRH - dantrolene.Low.8hr	Dantrolene	L		8h	0.0397823	0.0983213		0.159106	0.13886	0.101563	-0.0967137	-0.0471791	-0.0362851	0.0257197	0.0468249	-0.0141522	0.0737471	0.191833	0.118882	0.0588905			0.0617721	-0.0835768	-0.0148675	0.0753087	0.0825207	0.0695074	0.121127				0.251094		0.138001		0.0662017				-0.00440464	-0.156519	0.0421534	0.00287561
TG-GATES	Human	Liver	vitro	bolus	TG-HVitro PHH - acetamidofluorene.High.8hr	Acetamidofluorene	H		8h	0.0275929	0.0983278	-0.16174	-0.0536318	-0.127815	-0.0826924	0.157213	0.231714	-0.030646	0.038972	0.184817	0.0631329		-0.333654	-0.143361	-0.11868	-0.109988	0.266172	0.0322648	0.126688	0.131055	0.274847	0.0972438	-0.0218547		0.0200895	-0.118039	0.427061	0.0525853	0.0247943	-0.0273409	0.01465	-0.255932	-0.128805	-0.0821214	-0.0157613	0.0653096	0.0740989		0.0613523
TG-GATES	Rat	Liver	vivo	bolus	TG-RVivoLiverSingle - triamterene.Low.9hr	Triamterene	L		9h	0.155674	0.0983549		-0.0438914	0.0305725	-0.134583	0.190696	0.442664	0.112492	-0.595771	-0.0437358		0.0427499	0.0671096						0.237945		0.0704546	0.0249954	0.151209	0.0583026				-0.330646		-0.22562		0.690903					0.109586	0.501957	-0.0146694
TG-GATES	Rat	Liver	vivo	bolus	TG-RVivoLiverSingle - griseofulvin.Middle.9hr	Griseofulvin	M		9h	0.229318	0.0983767		0.365247	0.152444	0.224492	0.0714925	-0.126912	0.23859	-0.184573	-0.0538838		-0.106845	0.188454						-0.0137818		0.936417	0.0277738	-0.0530672	0.214391				-0.399094		-0.0638513		0.294651					0.00611317	-0.0584702	0.0100379
TG-GATES	Human	Liver	vitro	bolus	TG-HVitro PHH - tetracycline.High.8hr	Tetracycline	H		8h	0.078935	0.0986528	-0.21905	-0.0115159	-0.00850149	-0.0779632	-0.0637152	-0.0260353	0.0248079	-0.0787108	-0.0263885	-0.095922		0.185874	-0.0635219	-0.0270488	0.0183448	0.0461301	-0.0848558	0.0552168	-0.0350106	-0.0735965	-0.0392502	0.0553881		-0.0679405	0.145897	-0.171813	-0.016272	0.00726815	-0.0610238	-0.0590015	-0.146737	-0.0831576	0.210901	-0.0615035	0.0550547	0.0919887		-0.0321358
TG-GATES	Rat	Liver	vivo	repeat	TG-RVivoLiverRepeat - iproniazid.Low.29day	Iproniazid	L		29d	0.0894703	0.0986547		-0.127309	-0.0219141	-0.119991	-0.0538324	-0.153639	0.0193399	0.204416	0.0234856		-0.0839671	-0.330519						-0.0475779		-0.262775	0.0150486	-0.0130684	0.010319				-0.0288783		0.102625		1.05216					-0.00345725	-0.460736	0.0157391
TG-GATES	Rat	Liver	vitro	bolus	TG-Rvitro PRH - ticlopidine.Low.2hr	Ticlopidine	L		2h	-0.0292137	0.0986728		-0.0186507	0.236087	-0.0345136	-0.0562296	0.109601	0.0344292	-0.242899	-0.0300298	-0.0295115	-0.00981012	-0.0255732	-0.0752508	0.0408522			-0.0466603	-0.0208847	0.108392	0.151732	-0.1033	0.0578873	0.0538578				-0.387657		0.200518		0.0242455				-0.0310108	0.0773853	0.0915205	-0.0213981
TG-GATES	Rat	Liver	vivo	bolus	TG-RVivoLiverSingle - allopurinol.Middle.6hr	Allopurinol	M		6h	0.216908	0.0987314		0.0137237	-0.000554876	-0.119256	-0.0203257	-0.557956	0.0596504	0.282032	-0.0096402		-0.170697	0.131963						-0.149081		-0.0599347	0.0707471	0.230054	0.244516				0.995508		-0.0836453		-0.0826984					-0.108411	0.172782	0.00655554
TG-GATES	Rat	Liver	vivo	repeat	TG-RVivoLiverRepeat - bucetin.Middle.15day	Bucetin	M		15d	0.108005	0.0987337		0.202599	-0.0356847	-0.120805	0.00325961	-0.0247782	-0.0327792	0.0373961	-0.129729		0.155085	0.296245						0.0238009		-0.455217	-0.042871	-0.0997744	0.0203201				-0.0023877		0.00822985		0.81145					0.128362	0.0352138	0.00206754
TG-GATES	Rat	Liver	vivo	repeat	TG-RVivoLiverRepeat - enalapril.High.15day	Enalapril	H		15d	0.11352	0.0988342		-0.199	0.107561	-0.228817	-0.179921	0.17167	-0.0212516	-0.408433	-0.16543		0.502578	0.636284						-0.0686923		0.328775	-0.0779912	0.258936	0.0725097				0.719686		-0.249103		2.20371					0.03083	0.0655701	0.000869965
TG-GATES	Rat	Liver	vivo	repeat	TG-RVivoLiverRepeat - phenobarbital.High.4day	Phenobarbital	H		4d	0.140755	0.0988549		0.781078	3.39559	0.369199	-0.148654	-0.534809	0.421701	0.0271426	0.176981		-0.0556209	-1.22556						-0.0471157		-0.0221895	-0.0461259	0.0579868	-0.0347111				0.334726		-0.276126		2.78579					0.131869	-0.283615	-0.11754
TG-GATES	Rat	Liver	vivo	repeat	TG-RVivoLiverRepeat - ibuprofen.Low.4day	Ibuprofen	L		4d	0.0113011	0.0990469		0.192112	0.0263779	0.353437	-0.173485	0.0450142	0.0802846	-0.0678074	0.0792614		0.002497	0.531376						0.0277462		0.578604	-0.0447823	0.0423792	0.137352				-0.022649		0.0603775		0.111804					0.0124155	-0.195457	0.00980693
TG-GATES	Human	Liver	vitro	bolus	TG-HVitro PHH - penicillamine.High.24hr	Penicillamine	H		24h	-0.792811	0.0991713	0.0323311	0.267467	0.0205505	-0.244147	-0.0083194	0.480936	0.160829	-0.334272	-0.0444034	-0.242119		1.201	-0.0803902	-0.0876095	0.190442	-0.184525	-0.000523792	-0.273174	-0.172919	0.230213	0.141016	-0.0805257		0.139157	-0.195266	0.145233	0.27402	0.093812	0.262133	-0.0363446	0.185629	-0.195524	-0.104534	0.0175591	0.37827	-0.0694576		0.155093
TG-GATES	Rat	Liver	vivo	repeat	TG-RVivoLiverRepeat - terbinafine.Low.15day	Terbinafine	L		15d	-0.0282663	0.0991845		0.126527	-0.112713	-0.0777145	-0.0317495	0.0665015	0.0258795	-0.142041	-0.0669186		0.441051	0.327841						-0.109535		0.531202	0.0755026	0.0665425	0.0566341				-0.159895		0.0725899		0.807304					0.10789	0.0346762	-0.0148919
TG-GATES	Rat	Kidney	vivo	repeat	TG-RVivoKidneyRepeat - acetazolamide.Middle.4day	Acetazolamide	M		4d	-0.0789154	0.099202	-0.0538391	-0.0557923	-0.0191743	-0.204268	0.226799	-0.222292	0.00996275	0.266116	-0.0811344	-0.0861116	-0.166863	-0.324637		-0.0536038			-0.00675396	-0.0984468	-0.0640997	0.200327	-0.0984085	-0.119155	-0.235758				0.0949449		0.162985		0.0709994				-0.109286	-0.00785206	0.0174915	0.0454198
TG-GATES	Rat	Liver	vivo	bolus	TG-RVivoLiverSingle - labetalol.Middle.9hr	Labetalol	M		9h	0.316545	0.09928		-0.179907	0.0204072	0.09067	-0.126591	-0.363117	-0.0967544	0.195013	0.0955644		0.248716	0.248044						0.0186212		0.162212	-0.072175	0.120158	0.0316128				0.972788		-0.27693		0.599772					0.100103	0.326808	-0.00296134
TG-GATES	Rat	Liver	vivo	repeat	TG-RVivoLiverRepeat - papaverine.High.15day	Papaverine	H		15d	-0.0415461	0.0993809		0.340028	0.210111	0.532656	0.215973	0.163971	0.151433	0.0357255	-0.194322		0.207031	0.149322						0.0747034		0.263806	-0.113546	-0.0239447	-0.310122				-0.125965		-0.404869		0.609437					0.273113	-0.115741	-0.0150609
TG-GATES	Human	Liver	vitro	bolus	TG-HVitro PHH - tetracycline.High.2hr	Tetracycline	H		2h	-0.174763	0.0994108	-0.076832	-0.326805	-0.134842	-0.0881827	-0.167751	-0.0379516	-0.154791	-0.00813781	0.0447214	0.0273686		0.18776	-0.0136866	-0.0672209	0.128737	-0.109018	-0.130354	0.149348	0.0564708	0.267032	-0.235815	-0.0145624		-0.0432114	0.0956581	-0.192092	-0.0454935	-0.051883	-0.0449083	-0.125424	-0.218048	-0.0486415	0.0463811	-0.0249542	0.153665	0.0409434		0.0372641
TG-GATES	Rat	Liver	vivo	repeat	TG-RVivoLiverRepeat - flutamide.Low.8day	Flutamide	L		8d	0.0564658	0.0994545		0.170612	0.116488	0.0665535	0.124412	0.00835114	-0.0116426	-0.183129	-0.0730959		-0.0761421	0.41548						-0.0233171		-0.0359246	-0.0646958	-0.154823	-0.0958433				-0.959371		0.0164131		0.158627					0.018505	-0.218688	-0.0246383
TG-GATES	Rat	Liver	vitro	bolus	TG-Rvitro PRH - phenylbutazone.High.24hr	Phenylbutazone	H		24h	0.325652	0.0995341		0.307734	-0.151393	0.111091	-0.132291	0.154952	-0.0746014	0.0868572	-0.0230753	-0.0264165	0.575327	-0.0441338	0.273946	-0.0213674			-0.0180153	0.0223446	0.626202	-0.740864	-0.109575	-0.0289044	-0.448176				-0.166886		-0.684089		-1.62648				-0.177839	-0.0743183	0.0512597	0.0125792
TG-GATES	Rat	Liver	vivo	bolus	TG-RVivoLiverSingle - propranolol.Low.9hr	Propranolol	L		9h	0.00874503	0.0996161		0.239814	0.195392	-0.17333	-0.00804817	-0.127588	0.241636	0.142425	-0.0679729		0.184142	-0.544232						-0.0358304		0.103006	-0.0026829	0.0517086	-0.0533802				0.516808		-0.0500614		0.51378					0.0110582	0.117151	-0.00110059
TG-GATES	Rat	Liver	vitro	bolus	TG-Rvitro PRH - rifampicin.High.8hr	Rifampicin	H		8h	-0.0930494	0.0996391		0.229803	-0.176932	0.0560299	-0.0261225	-0.110992	0.0365405	0.29107	-0.0720762	0.156209	0.0269335	-0.255643	-0.133724	0.198636			-0.0903251	-0.0715391	0.255749	0.0540813	0.152331	-0.0350024	-0.160328				0.131422		0.197171		-0.242549				-0.141142	0.189746	0.0298165	0.0661286
TG-GATES	Rat	Liver	vivo	repeat	TG-RVivoLiverRepeat - promethazine.Middle.4day	Promethazine	M		4d	0.151068	0.0996403		0.581077	0.318654	0.447939	0.228122	-0.0376189	0.08474	0.0657042	0.00779524		0.288287	-0.401329						-0.146974		0.853434	0.0461445	0.230216	0.246285				0.224361		-0.113574		1.45486					-0.207462	-0.442426	-0.0704277
TG-GATES	Rat	Liver	vivo	repeat	TG-RVivoLiverRepeat - dantrolene.Middle.15day	Dantrolene	M		15d	0.0171696	0.0997238		0.329541	0.582524	0.104856	-0.128215	0.221638	0.104676	0.10735	0.364358		0.347601	0.372714						-0.167381		0.0569307	-0.217972	0.193744	-0.101873				0.493262		0.33737		3.5215					0.0436361	-0.270044	-0.0214322
TG-GATES	Rat	Liver	vivo	bolus	TG-RVivoLiverSingle - simvastatin.Low.6hr	Simvastatin	L		6h	-0.320321	0.0998332		-0.380318	-0.226453	0.30642	-0.121465	0.0255714	0.0357789	0.0930247	0.2849		-0.0202741	-0.247869						-0.0781763		0.543763	-0.133923	-0.116189	-0.0635345				0.159276		0.152436		-0.252762					-0.0514379	0.0583076	0.00661725
TG-GATES	Rat	Liver	vivo	bolus	TG-RVivoLiverSingle - methyltestosterone.Low.24hr	Methyltestosterone	L		24h	-0.0236471	0.0998482		-0.0309486	0.0268369	0.260038	-0.0609027	-0.123431	-0.0183945	-0.0249239	0.0261643		0.0941795	0.542967						0.0478266		0.326201	-0.170304	-0.0123586	-0.0687023				-0.457907		-0.0607665		0.669103					-0.0863625	-0.418048	-0.0102085
TG-GATES	Rat	Kidney	vivo	repeat	TG-RVivoKidneyRepeat - cyclosporine A.Low.4day	Cyclosporine A	L		4d	-0.0365258	0.0999377	-0.341551	0.173342	-0.200067	-0.101872	-0.155762	-0.0211307	-0.14145	0.0313906	0.0803419	0.0957275	0.0369531	0.266326		0.0494545			-0.0268162	-0.0469511	-0.0817243	-0.0559277	-0.0877319	0.0587521	-0.0663362				0.105581		-0.0131913		0.139337				-0.0342939	-0.0641224	0.00471483	0.131252
TG-GATES	Rat	Kidney	vivo	bolus	TG-RVivoKidneySingle - ketoconazole.High.9hr	Ketoconazole	H		9h	0.0441066	0.100016	-0.17505	-0.112674	0.123843	-0.158228	0.164379	0.0266239	0.0561999	-0.0444925	0.0781408	-0.185554	0.170527	0.503168		0.0535506			0.0186026	-0.00706459	0.193049	-0.11315	0.00532417	0.146777	0.241043				0.396391		0.0806977		0.0466411				0.0842212	0.0806547	-0.093611	-0.166149
TG-GATES	Rat	Liver	vitro	bolus	TG-Rvitro PRH - terbinafine.Low.8hr	Terbinafine	L		8h	-0.0376347	0.100157		0.0929252	-0.00157736	-0.233942	0.222174	-0.010798	0.00113376	0.256488	-0.180145	-0.0443639	-0.105472	-0.0510819	0.052548	0.120998			-0.142241	-0.0676641	-0.00887497	0.0650565	-0.0759455	-0.0862688	-0.0844902				-0.399516		-0.0151242		-0.0496033				-0.0107727	-0.10393	0.0242194	0.00227778
TG-GATES	Rat	Liver	vivo	repeat	TG-RVivoLiverRepeat - methyltestosterone.High.15day	Methyltestosterone	H		15d	-0.0448896	0.100212		-0.0871109	-0.295599	-0.236925	-0.120628	0.0471376	0.129235	0.774522	-0.170495		0.360971	-0.0942954						-0.0950629		-0.0516258	0.0258573	-0.0811628	-0.0774119				0.107193		0.00924668		-1.06772					0.14292	-0.474762	0.00650956
TG-GATES	Human	Liver	vitro	bolus	TG-HVitro PHH - omeprazole.High.2hr	Omeprazole	H		2h	0.0717466	0.100242	-0.0249279	0.00605995	0.167584	-0.0827452	-0.128583	0.0843304	-0.049319	-0.140189	0.0333166	-0.00593887		0.21146	-0.0159009	-0.0220333	0.140257	-0.29737	-0.084035	-0.13193	-0.193225	0.225421	-0.0651	-0.0487515		-0.029927	-0.102849	0.094725	0.0653845	0.027141	0.112893	-0.0665388	0.141679	-0.202006	0.0219912	0.0252542	0.0156543	0.0779709		0.000548264
TG-GATES	Rat	Liver	vivo	bolus	TG-RVivoLiverSingle - furosemide.High.6hr	Furosemide	H		6h	-0.23883	0.100291		-0.72629	-0.2556	-0.154025	-0.21757	-0.716973	-0.0807128	0.569992	-0.00767314		-0.114098	-0.251571						0.146347		-0.718655	-0.0217135	-0.199422	-0.0174495				-0.158643		-0.210055		-0.704113					0.0674919	-0.390402	0.0343908
TG-GATES	Rat	Liver	vivo	bolus	TG-RVivoLiverSingle - ketoconazole.Middle.3hr	Ketoconazole	M		3h	-0.0728656	0.100387		-0.0396487	-0.294854	-0.0299103	-0.160437	-0.0357571	0.0832467	0.463643	0.0405392		-0.274833	0.442835						0.0334627		0.24858	0.0083477	-0.0966724	0.0600976				-0.132461		-0.0513555		-0.391031					0.0413617	0.0803662	-0.000823379
TG-GATES	Rat	Liver	vivo	repeat	TG-RVivoLiverRepeat - carboplatin.Low.4day	Carboplatin	L		4d	0.0217143	0.100515		0.318388	0.12919	0.168223	-0.0691665	0.174517	0.0971174	-0.128853	-0.0676155		0.0437778	-0.00859227						0.13247		0.215229	0.0610478	-0.0388802	0.120609				-0.182775		-0.0940924		-0.681571					0.0868429	-0.140576	0.00835311
TG-GATES	Rat	Liver	vivo	repeat	TG-RVivoLiverRepeat - mefenamic acid.Middle.15day	Mefenamic acid	M		15d	-0.0922978	0.100567		-0.224784	0.110265	0.112399	-0.028267	0.666346	0.0194287	0.00709627	0.057679		0.00842565	-0.232885						-0.0905819		-0.103006	0.0460535	-0.16662	-0.0597864				0.0227302		-0.0503666		-0.731743					0.0602461	-0.208205	0.00270681
TG-GATES	Rat	Kidney	vivo	repeat	TG-RVivoKidneyRepeat - nitrofurantoin.High.29day	Nitrofurantoin	H		29d	-0.177853	0.100648	0.225762	2.04076	0.339645	-0.174128	0.190411	-0.199859	0.152429	0.162171	-0.236104	0.166626	-0.068261	0.984208		-0.428216			-0.0904226	-0.0782802	0.126729	-0.258966	0.103513	-0.129839	-0.275453				0.163814		0.0693332		-0.215881				-0.0142688	0.148711	0.229484	0.0936847
TG-GATES	Rat	Liver	vivo	bolus	TG-RVivoLiverSingle - fluphenazine.Low.24hr	Fluphenazine	L		24h	0.0728078	0.100735		-0.531024	0.415204	0.293091	-0.00754904	-0.337702	0.0110919	-0.182305	-0.149049		-0.211668	-0.0450026						0.00733178		-0.371898	0.0155453	0.449407	0.111575				-0.266806		-0.163533		0.0303508					0.21419	0.0255557	0.00801027
TG-GATES	Rat	Kidney	vivo	bolus	TG-RVivoKidneySingle - amphotericin B.Middle.24hr	Amphotericin B	M		24h	0.0428069	0.100738	-0.0683505	0.420145	0.197551	-0.113662	0.0441938	-0.350507	0.153601	-0.198962	-0.000419872	0.087088	0.24463	0.291628		-0.0455311			-0.0113819	-0.00416789	0.0906547	0.290447	-0.0964058	0.0120302	-0.0706042				0.235394		-0.0538484		0.0128555				-0.10308	0.00610498	-0.0900885	-0.156874
TG-GATES	Rat	Liver	vivo	bolus	TG-RVivoLiverSingle - ibuprofen.Middle.9hr	Ibuprofen	M		9h	0.245587	0.100742		-0.233538	-0.00892545	-0.0792502	-0.0108128	0.436033	0.0706767	-0.0645602	-0.116633		1.51282	-0.0761935						-0.0975657		-0.269609	0.0479273	0.284588	0.0308298				-0.107248		-0.3564		1.06562					0.135326	0.196051	-0.045548
TG-GATES	Rat	Liver	vivo	bolus	TG-RVivoLiverSingle - indomethacin.Middle.6hr	Indomethacin	M		6h	-0.0678326	0.100744		-0.0747841	-0.085351	-0.0453665	-0.175287	0.105972	0.0273458	-0.332027	0.0603093		0.103423	0.516257						-0.049084		0.0460518	-0.137634	-0.172865	0.110681				0.518862		0.0847523		-0.449651					-0.105944	-0.105398	-0.0135096
TG-GATES	Rat	Liver	vivo	bolus	TG-RVivoLiverSingle - tiopronin.Low.3hr	Tiopronin	L		3h	-0.325596	0.100749		-0.437801	0.000913736	-0.279242	0.0822188	0.421143	-0.0858823	-0.421097	0.16272		-0.153738	0.3522						0.117402		0.646231	0.130134	0.0633634	-0.149396				-0.00720458		0.255426		0.101719					0.0721355	-0.517128	0.041903
TG-GATES	Rat	Liver	vivo	repeat	TG-RVivoLiverRepeat - nimesulide.High.15day	Nimesulide	H		15d	-0.032303	0.100821		0.137202	1.45057	-0.0443	0.046199	0.0275	0.217112	0.212064	-0.0789682		-0.188602	-0.378748						0.0159549		0.35247	0.0832558	-0.138111	-0.0981308				-0.795605		0.181198		2.44538					0.180975	-0.293252	-0.055856
TG-GATES	Human	Liver	vitro	bolus	TG-HVitro PHH - allyl alcohol.Middle.24hr	Allyl alcohol	M		24h	-0.0582783	0.100843	-0.19294	0.153786	-0.0106677	0.205892	-0.0808445	-0.053894	0.074434	0.0186649	-0.0410529	0.146344		-0.144968	-0.100174	0.00645978	-0.0744016	-0.0106223	-0.02788	0.0552415	0.185628	0.298261	0.0132315	-0.00765087		0.0246546	0.0304992	0.188257	0.191032	0.114541	0.125333	0.0989462	0.151155	0.0875967	0.0309131	0.0144076	-0.142453	-0.0953669		-0.0895775
TG-GATES	Rat	Liver	vitro	bolus	TG-Rvitro PRH - etoposide.Low.8hr	Etoposide	L		8h	-0.0434552	0.100906		0.159703	0.0197647	-0.0884996	-0.152434	0.106448	0.415447	0.280407	0.0282252	0.0366384	-0.0820546	-0.0604183	-0.0808316	0.270689			-0.0476827	-0.319928	0.0673224	0.0892981	0.0500273	-0.0991481	-0.135602				0.10475		0.174258		0.320818				0.0437893	-0.076107	0.0578602	-0.0101661
TG-GATES	Rat	Liver	vivo	repeat	TG-RVivoLiverRepeat - clofibrate.Low.8day	Clofibrate	L		8d	-0.129851	0.100947		-0.252027	0.0043557	0.0167004	0.154629	0.0980941	0.0399547	-0.0604769	-0.00645726		0.51426	-0.0979073						0.0384359		0.104241	-0.0292457	-0.18402	0.0193329				-0.103574		-0.124457		0.456046					0.0148095	-0.717586	-0.0126998
TG-GATES	Human	Liver	vitro	bolus	TG-HVitro PHH - acetazolamide.High.24hr	Acetazolamide	H		24h	0.0443969	0.100983	-0.0153994	0.186379	0.0300088	-0.0545418	-0.0307813	0.0652976	0.127658	0.100294	-0.0385755	0.0551742		-0.0725255	-0.00864565	-0.0857605	-0.0151234	0.0686616	0.0518535	-0.0663718	0.0353923	-0.17742	0.116869	0.0756149		-0.137394	-0.152479	0.53468	0.0139814	0.104691	-0.0431997	0.0225403	0.0995367	-0.115143	0.051481	0.041317	0.087713	0.00117673		0.0119365
carcinoGENOMICS	Human	Kidney	vitro	bolus	CX HVitro RPTEC 24h - BEA vs DMSO	Benzyl alcohol	IC10	10000	24h	-0.0342817	0.101024	-0.0430622	-2.1459	-0.143334	0.111073	-0.0687809	0.654511		-0.143265	0.0779304	0.250358		1.4768	-0.290505	0.440554	-1.76773	0.186088	-0.0334129	-0.0929518	0.404875	0.30941	-0.331459	0.626969		0.26151	0.39272	-0.672307	0.649835		0.337355	-0.0602312	0.159791	0.257081	-1.9201	-0.395574	-0.0501528	-0.438949	0.0637279	2.38886
TG-GATES	Rat	Liver	vitro	bolus	TG-Rvitro PRH - ethambutol.Low.2hr	Ethambutol	L		2h	0.0271988	0.101036		-0.0709143	0.178075	0.058219	-0.0959789	-0.210269	0.132042	0.106899	0.0434361	0.0534436	0.124467	-0.138248	-0.00492642	0.0705123			-0.031888	0.0690113	-0.0559496	0.00493735	0.119751	0.149323	0.125157				-0.0228528		-0.315875		-0.029298				0.000747391	0.182349	0.0578644	0.0480577
TG-GATES	Rat	Liver	vivo	repeat	TG-RVivoLiverRepeat - chlormadinone.Low.29day	Chlormadinone	L		29d	0.0895734	0.101079		0.0510584	0.216513	0.123264	-0.0981404	0.147802	0.0971797	0.093505	-0.302651		0.0889808	0.356275						-0.0230017		0.0828229	0.238447	-0.166098	0.122991				-0.061793		0.0605246		0.318522					0.114726	-0.154095	-0.0322301
TG-GATES	Human	Liver	vitro	bolus	TG-HVitro PHH - monocrotaline.High.24hr	Monocrotaline	H		24h	0.142443	0.10119	-0.109377	0.121087	0.248061	-0.0322799	0.0511369	-0.15613	0.0867953	0.137528	0.158265	0.069673		0.00741285	0.0258595	-0.11071	0.235133	-0.0907861	-0.0100365	0.236179	0.145994	0.0127917	0.00392882	0.0396749		-0.119693	0.205338	-0.141501	0.0236888	-0.0234279	-0.080104	0.0648098	-0.0477392	-0.0532188	0.108035	0.323757	0.161545	0.20272		0.122326
TG-GATES	Rat	Liver	vivo	repeat	TG-RVivoLiverRepeat - diazepam.Middle.29day	Diazepam	M		29d	-0.093039	0.101229		-0.339977	0.134596	-0.340315	-0.197279	-0.416968	-0.0570427	0.248214	0.0654757		0.22445	0.116618						-0.0969497		0.36476	-0.0477792	-0.0247139	-0.091281				-0.0885718		0.143577		1.75384					0.0552296	-0.534404	-0.0530781
TG-GATES	Rat	Kidney	vivo	repeat	TG-RVivoKidneyRepeat - omeprazole.High.4day	Omeprazole	H		4d	-0.162195	0.10124	-0.0694583	0.419521	0.379118	0.259731	0.166542	-0.0576801	0.198778	0.0582479	0.104315	0.0991509	-0.0382547	0.0623168		-0.250452			-0.0914652	0.0908152	0.161681	0.1984	-0.136607	-0.00533701	-0.115655				0.705919		0.0565307		0.144333				-0.290963	0.213631	0.0679827	0.253894
TG-GATES	Rat	Liver	vivo	bolus	TG-RVivoLiverSingle - flutamide.High.3hr	Flutamide	H		3h	0.0592259	0.101282		0.404474	0.0745988	0.116041	-0.11871	0.284409	0.0109873	-0.501352	0.0107387		-0.0888436	0.0870697						-0.0381251		0.705062	0.0382375	0.0615238	-0.0240333				-0.988466		-0.19196		-0.238311					0.124995	0.295484	0.0222867
TG-GATES	Rat	Liver	vivo	repeat	TG-RVivoLiverRepeat - carbon tetrachloride.Low.4day	Carbon tetrachloride	L		4d	-0.146648	0.1014		0.200858	0.0375914	-0.0651658	-0.10248	-0.000106125	-0.0294478	0.249551	0.170905		0.135709	-0.335983						-0.0277116		-0.102782	0.160078	0.109164	-0.112053				0.108947		0.0283628		0.184209					0.109069	-0.0105191	0.0168021
TG-GATES	Rat	Liver	vivo	bolus	TG-RVivoLiverSingle - acetazolamide.Middle.6hr	Acetazolamide	M		6h	-0.511203	0.101632		-0.258392	-0.339783	-0.111651	-0.175247	-0.0289199	0.0753393	0.119812	0.0369702		0.126325	-0.412033						0.116491		-0.0949907	0.00122259	-0.193467	0.0116673				0.337036		0.297837		-0.488099					0.0427261	-0.0524002	0.00113948
TG-GATES	Rat	Liver	vivo	bolus	TG-RVivoLiverSingle - phenylbutazone.High.9hr	Phenylbutazone	H		9h	0.581924	0.101709		0.111354	0.343023	0.157761	0.0502103	-0.600229	0.403407	-0.57143	-0.10877		0.0601666	-0.783536						-0.0558299		0.668231	0.0358258	0.481555	0.102732				0.74643		-0.54934		0.673765					0.170416	-0.0487138	-0.0109557
TG-GATES	Rat	Liver	vivo	bolus	TG-RVivoLiverSingle - terbinafine.Middle.3hr	Terbinafine	M		3h	-0.117464	0.101753		-0.205941	0.20142	-0.119977	0.066654	0.0835601	-0.0583993	0.135534	-0.189286		0.159972	-0.291462						-0.0286786		0.437542	0.071293	-0.0743917	0.0239128				-0.460892		-0.195764		0.22941					-0.0404883	-0.184449	0.0285372
TG-GATES	Rat	Liver	vivo	repeat	TG-RVivoLiverRepeat - methapyrilene.Middle.15day	Methapyrilene	M		15d	-0.00363054	0.101952		0.597109	1.66008	0.190287	0.098163	-0.381586	0.112768	-0.394754	-0.321614		1.55507	0.299448						0.128283		0.603874	-0.0284407	0.0780929	0.093196				0.244714		-0.0172422		3.07646					-0.0921906	-0.428919	-0.101489
TG-GATES	Rat	Liver	vivo	bolus	TG-RVivoLiverSingle - diltiazem.Middle.9hr	Diltiazem	M		9h	0.0909024	0.101957		0.177102	1.18456	0.15853	0.228168	-0.0277396	0.143083	0.0179159	0.021148		-0.399806	0.232263						0.153785		0.814698	0.10999	-0.00281889	0.00520473				-0.393118		-0.0563367		0.554199					-0.0601624	0.0841252	-0.0199664
TG-GATES	Rat	Liver	vitro	bolus	TG-Rvitro PRH - fluphenazine.Middle.8hr	Fluphenazine	M		8h	0.074898	0.102032		0.154048	0.0527732	0.0886709	0.0179769	-0.0403853	0.122327	-0.200589	-0.00659802	0.0889056	0.0674149	0.0776091	-0.0607964	0.0698135			0.0667964	0.0368913	0.101397	0.147294	-0.0835523	0.0419452	-0.015552				-0.0044238		0.0417953		0.138057				0.0642216	0.16137	0.0432593	0.0297166
TG-GATES	Rat	Kidney	vivo	repeat	TG-RVivoKidneyRepeat - captopril.Low.29day	Captopril	L		29d	-0.0182716	0.102045	0.104317	-0.150232	-0.14439	-0.0505847	0.0184577	-0.0406548	0.0474211	0.0913891	-0.0502412	-0.266924	-0.00108362	0.116423		0.0308365			0.0320096	-0.00171047	0.0964995	0.0760642	-0.0259143	0.0835164	-0.148861				0.193449		0.00715767		0.0715914				0.0165016	-0.0103271	-0.0828614	0.0117666
TG-GATES	Rat	Liver	vivo	repeat	TG-RVivoLiverRepeat - vitamin A.Middle.15day	Vitamin A	M		15d	-0.105692	0.102336		-0.0880064	-0.168516	-0.13344	-0.097821	0.0584085	0.0271364	0.283356	0.0485198		0.00556088	0.168426						-0.0378236		0.298397	0.0351235	-0.180669	-0.146843				1.16778		-0.38434		-0.0524824					-0.0966098	0.234937	0.0430623
TG-GATES	Rat	Liver	vivo	repeat	TG-RVivoLiverRepeat - gemfibrozil.Middle.8day	Gemfibrozil	M		8d	-0.15599	0.102397		-0.439855	0.999839	0.472416	-0.0730633	0.295009	0.445236	0.073853	-0.117306		2.64317	0.0321083						-0.0744858		-0.0253042	0.0212665	0.202087	-0.0438084				-1.85542		0.098523		3.40437					-0.148664	-0.787448	-0.134134
TG-GATES	Rat	Liver	vitro	bolus	TG-Rvitro PRH - ethanol.Low.2hr	Ethanol	L		2h	-0.0148281	0.102461		-0.0658734	-0.223502	-0.0191579	-0.152255	-0.161918	-0.0159327	0.0758175	0.0105542	-0.0274729	0.0428758	0.0464582	-0.00423352	0.0381351			0.0965925	-0.0514749	-0.0088248	-0.0975851	0.183365	0.042422	0.071827				0.129751		-0.221896		-0.111075				-0.0140786	0.142246	0.0591329	-0.0294316
TG-GATES	Rat	Liver	vivo	bolus	TG-RVivoLiverSingle - promethazine.Middle.6hr	Promethazine	M		6h	-0.156743	0.102497		0.268144	-0.00130509	-0.346876	-0.0219035	-0.73243	0.0599361	-0.0184846	-0.125306		0.104906	0.517225						0.0348375		1.2746	0.0378763	-0.0974618	0.0545174				1.2943		0.171735		0.258648					0.0122453	-0.147726	-0.00675381
TG-GATES	Rat	Liver	vivo	repeat	TG-RVivoLiverRepeat - phenytoin.High.15day	Phenytoin	H		15d	-0.0323065	0.1025		0.0747728	0.914312	-0.141037	0.0162841	0.255035	0.0179513	0.186845	-0.0744076		0.0959651	-0.152848						0.123227		0.46451	0.155928	0.0756907	-0.12044				-0.37379		0.087382		1.97984					-0.0433217	-0.152753	-0.0206589
TG-GATES	Rat	Liver	vivo	repeat	TG-RVivoLiverRepeat - lornoxicam.Low.4day	Lornoxicam	L		4d	-0.000242335	0.102541		-0.0730402	0.122748	-0.459882	0.00461145	-0.1638	-0.0369993	-0.658709	-0.0859259		-0.2418	-0.0023662						-0.0180971		-0.325706	0.0750681	0.11294	0.0226728				-0.108553		0.226769		0.0782952					0.0565444	-0.266414	-0.0200068
TG-GATES	Rat	Liver	vivo	repeat	TG-RVivoLiverRepeat - monocrotaline.Low.29day	Monocrotaline	L		29d	0.0326466	0.102578		-0.00351386	-0.0249709	0.156698	0.0425016	-0.069339	0.378687	-0.316833	0.152492		-0.156286	0.194975						0.045661		0.491059	-0.0985881	-0.0235255	0.119985				-0.490101		0.0934234		2.48862					-0.010126	0.388499	-0.0290822
TG-GATES	Rat	Liver	vivo	repeat	TG-RVivoLiverRepeat - labetalol.Low.29day	Labetalol	L		29d	-0.08964	0.102621		-0.224717	-0.0302308	-0.138536	0.0374964	-0.0205137	0.0408432	-0.0166692	0.084542		0.12637	-0.187414						0.0745896		-0.0507308	0.0378768	0.0218649	-0.0820939				-0.145686		0.0851272		0.130287					-0.0890184	-0.179862	-0.00717168
TG-GATES	Human	Liver	vitro	bolus	TG-HVitro PHH - indomethacin.Middle.8hr	Indomethacin	M		8h	0.0599767	0.102707	0.153972	0.0513663	0.0141119	-0.0298336	-0.0359584	0.0494819	0.0712647	0.075668	-0.033315	-0.0347798		0.0335683	0.169292	0.16564	0.155578	-0.0420339	0.0951602	-0.0409537	0.160486	-0.0283628	-0.156228	0.0631355		-0.0454603	0.0213407	0.0167746	0.0265617	-0.000872572	0.00184063	-0.00283397	0.0167132	-0.12852	0.0113066	0.027941	-0.0318622	0.0226085		0.00184901
TG-GATES	Rat	Liver	vivo	bolus	TG-RVivoLiverSingle - nicotinic acid.Middle.6hr	Nicotinic acid	M		6h	-0.0888379	0.102813		-0.0283269	0.207149	0.0828699	-0.0222984	-0.364175	0.0471303	-0.0716343	0.112521		-0.0809042	0.043029						0.103038		0.872308	0.0538368	-0.187838	0.0268827				-0.20539		-0.0150675		0.488068					-0.00982904	0.195576	-0.00707812
TG-GATES	Rat	Liver	vivo	repeat	TG-RVivoLiverRepeat - ajmaline.High.4day	Ajmaline	H		4d	-0.0644877	0.102862		0.367416	1.29477	-0.490366	0.0193139	0.269153	-0.0136197	-0.091532	0.0114298		-0.0629935	-0.38045						-0.00622161		-0.181282	-0.164334	0.432755	-0.0859711				-1.12976		-0.304558		1.12987					0.0404106	-0.394808	-0.0150437
TG-GATES	Human	Liver	vitro	bolus	TG-HVitro PHH - diethyl maleate.Low.8hr	Diethylmaleate	L		8h	0.152546	0.103011	-0.0878686	0.158882	0.0473286	0.161849	0.101906	0.0646508	0.168621	-0.106592	0.092704	-0.0596454		0.126643	-0.120706	0.0956805	-0.00335243	0.0724434	-0.101453	-0.0347956	0.210991	-0.228246	0.0333091	0.150572		-0.038399	-0.0531244	0.497209	0.0931097	0.0220646	-0.0221304	0.022989	-0.0796927	-0.0070338	0.132154	0.0419368	-0.0192765	0.127503		0.069623
TG-GATES	Rat	Liver	vivo	repeat	TG-RVivoLiverRepeat - theophylline.Middle.29day	Theophylline	M		29d	-0.0849572	0.103025		0.452412	0.117809	0.0200752	0.17379	0.349282	0.117118	-0.486176	-0.258816		0.137792	0.123471						0.0375431		0.466953	0.106867	-0.340194	0.104543				0.0328682		0.249153		0.662694					0.268193	-0.227552	0.01839
TG-GATES	Rat	Kidney	vivo	bolus	TG-RVivoKidneySingle - phenacetin.High.3hr	Phenacetin	H		3h	0.0605199	0.103052	0.135452	0.211055	0.0641932	-0.140776	-0.115213	-0.0579756	0.10676	0.0973915	-0.0251624	0.0261657	0.0469759	0.728481		0.0845475			0.0411804	0.124416	0.118773	-0.261811	-0.124643	-0.147337	0.0736146				0.399027		0.073209		0.150663				-0.000660113	0.317465	-0.170397	0.10825
TG-GATES	Rat	Liver	vivo	bolus	TG-RVivoLiverSingle - dantrolene.Low.9hr	Dantrolene	L		9h	-0.119431	0.103262		-0.436065	0.563053	0.431753	0.0240826	-0.241371	-0.0982462	-0.287726	-0.0027349		0.133959	-0.0583953						-0.111715		-0.15743	0.286896	-0.0780978	-0.207404				-0.16343		-0.0599139		0.319271					0.159223	-0.153598	0.0149747
PREDICT-IV	Rat	Liver	vitro	repeat	PIV Rvitro Repeat PRH - FNOFBT_HD14_LFC	Fenofibrate	H		14d	0.0337955	0.103314	-0.00630304	-0.0708079	-0.512511	0.0842121	0.050807	1.25985	0.247101	-0.682138		-0.00290541	5.76171	0.676323	-0.0740422	-0.0915085	0.880062	0.000169959	0.118935	0.229484	0.0445195	-1.10037	0.0344933	0.759268	-0.512288	-0.0828709	0.117492	0.0385862	-0.769688		0.241481	0.123056	0.246305	-0.0141748		0.0839328	0.0802514	-0.0208538	0.584142	-0.661044
TG-GATES	Human	Liver	vitro	bolus	TG-HVitro PHH - propylthiouracil.High.2hr	Propylthiouracil	H		2h	-0.0466628	0.103328	0.101874	-0.0996211	-0.047542	-0.122386	0.0471157	-0.0178938	-0.0584079	-0.0244984	-0.0829823	-0.0544499		-0.0206521	-0.0443723	0.0190083	-0.140197	-0.143216	0.0353513	0.0211752	-0.0200384	-0.206086	-0.143848	0.0115772		-0.0641928	-0.0976215	-0.142955	-0.0333891	-0.0385979	-0.0651481	0.205069	-0.246702	0.228807	0.0318861	0.060112	-0.0823347	-0.0190494		0.00842588
TG-GATES	Rat	Kidney	vivo	bolus	TG-RVivoKidneySingle - methyltestosterone.Low.24hr	Methyltestosterone	L		24h	-0.067789	0.10336	-0.0263787	0.133487	0.0224013	-0.0845287	-0.174818	-0.0583631	-0.00886985	0.253163	0.00331873	0.27477	-0.148026	0.383925		0.188091			-0.0967901	-0.0504071	-0.17751	-0.218081	0.0331429	0.0404685	0.00497949				-0.454033		0.297586		0.0469546				-0.0151432	-0.1348	0.0765412	0.161488
TG-GATES	Rat	Liver	vivo	bolus	TG-RVivoLiverSingle - amiodarone.Low.24hr	Amiodarone	L		24h	0.216802	0.103594		0.180685	0.203045	0.245778	-0.0383574	-0.616985	0.136334	-0.091908	-0.205049		0.458108	-0.883067						0.00761475		0.363486	-0.0566408	0.161093	0.091597				0.544471		-0.661798		0.146947					0.0900347	0.0170861	-0.0220338
TG-GATES	Rat	Liver	vitro	bolus	TG-Rvitro PRH - enalapril.Low.2hr	Enalapril	L		2h	-0.0237463	0.103665		0.00149039	-0.169715	0.0777375	-0.0860109	-0.146949	-0.0454659	-0.23345	-0.0201314	-0.0379904	0.0910612	-0.139035	0.102708	0.00563828			0.262342	0.0907459	-0.0073107	-0.115407	0.119255	-0.0160473	0.0257489				0.066818		0.0171025		-0.146465				-0.00360351	-0.0427397	0.0870585	-0.00440325
TG-GATES	Rat	Liver	vivo	repeat	TG-RVivoLiverRepeat - naproxen.Low.8day	Naproxen	L		8d	-0.0918933	0.103711		-0.289703	-0.0633471	-0.103753	-0.154352	0.0110137	0.0145351	0.000131332	0.146024		0.21643	-0.0691762						0.00917422		0.280809	-0.0246709	0.0923549	-0.19341				0.497687		0.074751		0.642914					0.036649	-0.14215	-0.00918281
TG-GATES	Rat	Liver	vivo	repeat	TG-RVivoLiverRepeat - quinidine.Low.4day	Quinidine	L		4d	-0.161404	0.103795		-0.06288	0.112782	0.16107	0.0752152	-0.242913	-0.0954343	0.0507706	-0.112794		0.0824552	0.368006						-0.012294		0.295853	-0.0132269	0.0306533	-0.148818				-0.286222		-0.0320826		0.238266					0.0669141	0.313709	-0.0473834
TG-GATES	Rat	Liver	vivo	repeat	TG-RVivoLiverRepeat - chlorpromazine.Middle.8day	Chlorpromazine	M		8d	-0.0806304	0.103886		-0.204646	0.0905954	-0.19352	0.201473	-0.498579	0.0415064	-0.26423	-0.080888		0.0874476	0.621884						0.0579981		0.738858	0.0134209	0.258942	0.0685141				-0.422378		0.0856727		1.4					-0.0654705	-0.0794159	-0.0119191
TG-GATES	Rat	Liver	vivo	bolus	TG-RVivoLiverSingle - captopril.Low.24hr	Captopril	L		24h	-0.166362	0.103899		-0.322521	0.0522303	0.0628673	-0.111598	-0.123799	0.106668	-0.727572	-0.0247786		0.169107	0.439939						-0.0253749		-0.377197	-0.125899	0.252237	0.056941				-0.448973		0.161185		0.376865					-0.108903	0.0094986	0.00800324
TG-GATES	Rat	Liver	vivo	repeat	TG-RVivoLiverRepeat - tamoxifen.High.15day	Tamoxifen	H		15d	0.175047	0.10393		0.127449	0.412945	-0.0293677	-0.224251	0.09891	0.148752	-0.566416	-0.144392		0.785609	-0.318066						-9.6131e-05		0.221413	-0.0992158	1.06311	-0.017968				0.741953		0.380034		2.81049					0.172197	0.23092	-0.0464194
TG-GATES	Rat	Liver	vivo	repeat	TG-RVivoLiverRepeat - clomipramine.Middle.8day	Clomipramine	M		8d	0.047691	0.104018		-0.0508198	-0.0657075	0.298103	0.0521391	-0.289878	-0.0317074	-0.0625612	-0.0941082		0.255734	-0.996538						0.151116		-0.160167	0.106085	0.0875049	0.0476813				0.0903943		-0.021366		0.658231					-0.265144	-0.0428263	0.0448292
TG-GATES	Rat	Liver	vivo	bolus	TG-RVivoLiverSingle - diltiazem.Low.24hr	Diltiazem	L		24h	0.037824	0.104063		0.181624	1.08598	0.503835	0.0109766	0.221762	0.0999047	-0.145611	0.0153778		0.150219	-0.193218						0.117344		-0.455338	0.076958	-0.0459919	0.0610054				-0.0568259		-0.271908		0.359444					-0.170769	-0.140315	-0.0276502
TG-GATES	Rat	Liver	vitro	bolus	TG-Rvitro PRH - bucetin.Middle.2hr	Bucetin	M		2h	-0.0435158	0.104275		-0.0421926	0.241413	-0.288977	0.107113	-0.248996	-0.0384226	0.048685	-0.219557	0.0518494	0.0496896	0.0738031	0.0492086	-0.148193			0.159291	-0.0730349	-0.0759277	-0.058262	0.141458	-0.223605	0.0672606				0.384478		0.339351		0.0747401				0.0324987	0.0924823	0.0557375	0.0148831
TG-GATES	Rat	Liver	vivo	repeat	TG-RVivoLiverRepeat - allyl alcohol.Middle.4day	Allyl alcohol	M		4d	0.0568545	0.10428		0.308063	0.0241788	-0.457127	-0.0605398	-0.0845481	0.00209648	-0.39499	-0.0223948		0.170503	0.0452153						0.121989		0.0720012	0.139637	0.0068832	0.105028				0.244243		-0.112185		0.858818					0.14471	0.0756961	-0.0059804
TG-GATES	Rat	Liver	vivo	repeat	TG-RVivoLiverRepeat - benzbromarone.Middle.4day	Benzbromarone	M		4d	0.0356039	0.104286		-0.0685875	0.485397	-0.0997651	-0.148363	0.406592	0.120639	-0.403518	0.0782144		2.26128	1.15549						-0.0285694		0.119966	-0.119595	0.134406	-0.172539				-0.727803		0.296944		2.83081					0.0647372	-0.811588	-0.0862723
TG-GATES	Rat	Liver	vivo	repeat	TG-RVivoLiverRepeat - mefenamic acid.Low.4day	Mefenamic acid	L		4d	0.0559689	0.104288		0.0150397	-0.0190051	-0.331773	-0.178955	0.0853251	-0.0849877	-0.109413	0.0740877		-0.0155162	0.0488508						8.22153e-06		-0.0102059	0.157411	-0.0689763	-0.165279				-0.59202		-0.34876		-0.608539					0.339032	-0.189429	-0.00342146
TG-GATES	Rat	Liver	vivo	repeat	TG-RVivoLiverRepeat - quinidine.Middle.15day	Quinidine	M		15d	0.134234	0.104306		0.0151982	-0.0273266	0.0747989	0.0495404	-0.337357	0.0495845	-0.258771	-0.0358703		-0.179728	0.455282						-0.00178047		-0.048615	-0.016734	-0.0369333	0.0653607				0.209594		-0.154479		-0.231752					-0.138066	0.298633	0.0236459
TG-GATES	Human	Liver	vitro	bolus	TG-HVitro PHH - tiopronin.Middle.8hr	Tiopronin	M		8h	0.00918609	0.104462	-0.0803158	0.0164602	-0.0935009	-0.000366002	-0.0239098	0.0107174	0.0769345	-0.105525	-0.025368	-0.0734561		0.13002	-0.0286477	-0.00146612	0.0644475	0.0325976	-0.173545	-0.0603548	-0.0294572	-0.0157168	0.087496	0.00288824		-0.0450959	0.170006	0.0183372	0.0365116	-0.00852532	-0.0579886	-0.0604508	-0.0049208	0.030708	0.0140503	0.0185106	0.131934	0.037342		-0.00664681
TG-GATES	Rat	Liver	vivo	bolus	TG-RVivoLiverSingle - allyl alcohol.Middle.6hr	Allyl alcohol	M		6h	-0.0371434	0.104486		0.0532076	0.0412993	0.447755	-0.0148563	-0.0724656	-0.0232032	-0.203972	0.0578697		0.169419	0.354418						-0.0241113		-0.199545	-0.0556133	0.0563013	0.0930084				-1.08031		0.181994		0.0059789					-0.105035	0.0612764	-0.000711317
TG-GATES	Rat	Liver	vivo	repeat	TG-RVivoLiverRepeat - valproic acid.Middle.15day	Valproic acid	M		15d	-0.0354176	0.104598		-0.105775	-0.0736342	-0.388437	0.072792	0.0224423	0.109539	0.00755152	-0.00417318		-0.0554711	0.168747						0.0977677		0.445869	0.0778067	-0.126702	-0.166928				-0.436654		-0.15749		0.676748					0.111244	0.129169	-0.0108836
TG-GATES	Rat	Liver	vivo	repeat	TG-RVivoLiverRepeat - diazepam.High.29day	Diazepam	H		29d	-0.264431	0.104648		0.0619037	1.11088	-0.162759	-0.261064	-0.129287	0.0292375	-0.0186451	0.074116		0.176918	0.889705						-0.0279357		0.833403	-0.143561	0.137118	-0.121329				-0.502184		-0.0322098		3.23492					0.0785543	-0.592763	-0.0660445
TG-GATES	Rat	Liver	vivo	bolus	TG-RVivoLiverSingle - tiopronin.Middle.24hr	Tiopronin	M		24h	-0.0289011	0.104775		-0.00393181	0.0287336	-0.130249	-0.0222006	0.0883914	0.0127878	0.055462	0.0953187		-0.111506	-0.0385086						0.0579974		0.317592	-0.123039	-0.0576832	-0.0969515				-0.38481		0.124409		-0.0668114					-0.0945539	0.034663	-0.0271341
TG-GATES	Human	Liver	vitro	bolus	TG-HVitro PHH - captopril.High.8hr	Captopril	H		8h	-0.221512	0.104846	-0.119574	0.383544	-0.348527	-0.062352	0.0591167	0.179198	0.387048	-0.582631	0.0531015	-0.0307763		0.130028	-0.0619292	-0.106369	-0.0232736	-0.133715	0.12866	0.0669031	-0.105631	0.914562	0.103773	0.0885751		0.0824718	-0.14265	0.0211238	0.193405	0.142608	0.306149	-0.214518	0.18782	0.13412	0.0137223	0.0143846	0.0385197	-0.14549		0.0919949
TG-GATES	Human	Liver	vitro	bolus	TG-HVitro PHH - tetracycline.Low.2hr	Tetracycline	L		2h	-0.0244515	0.104864	-0.149807	-0.00811472	-0.0416151	0.149622	-0.0915102	0.0704043	-0.073224	0.0265544	0.223915	0.263421		0.210111	-0.065342	-0.210947	0.0298372	0.111825	-0.0837955	0.136995	0.0865652	0.315349	-0.154715	-0.0744438		0.0196277	0.106605	0.0737018	-0.0682163	-0.0240156	-0.0194178	0.0808095	-0.108508	-0.0148615	0.0327729	0.0447073	0.107273	-0.0578382		0.0681663
TG-GATES	Rat	Liver	vivo	bolus	TG-RVivoLiverSingle - ethionine.Low.6hr	Ethionine	L		6h	0.137943	0.104889		-0.122564	0.0649982	0.233126	-0.246051	-0.308756	-0.082252	0.103713	-0.0665663		0.228697	-0.0928201						-0.0185712		-0.205656	-0.111368	-0.195449	-0.0717308				-0.90773		-0.113637		0.576442					0.0486695	0.909886	-0.0686123
TG-GATES	Rat	Kidney	vivo	bolus	TG-RVivoKidneySingle - nitrofurantoin.Low.6hr	Nitrofurantoin	L		6h	0.00418845	0.104893	-0.0945144	0.208477	-0.196221	-0.0110002	-0.114203	-0.00204112	0.0523152	-0.0623645	-0.0116704	0.013124	0.00229703	-0.0972883		-0.0136655			-0.15467	-0.152054	-0.0546554	0.149857	0.0780928	0.0262859	0.219521				0.766092		0.0446712		0.0597276				-0.0137922	0.0992267	-0.0888879	-0.0240827
TG-GATES	Rat	Kidney	vivo	repeat	TG-RVivoKidneyRepeat - cephalothin.Middle.4day	Cephalothin	M		4d	-0.0791918	0.104902	0.132369	0.438182	0.0280125	0.123974	0.0703136	-0.0332007	-0.0415538	-0.0703047	-0.078424	0.160671	-0.116634	0.225592		-0.279446			-0.00384428	0.127712	-0.155991	-0.430303	-0.0754342	0.141797	-0.180543				-0.678967		-0.00440896		0.0429922				-0.0797307	0.129204	0.231586	0.0813227
TG-GATES	Human	Liver	vitro	bolus	TG-HVitro PHH - phenytoin.High.2hr	Phenytoin	H		2h	-0.00127301	0.105196	0.113272	-0.0288713	0.0532797	0.1086	0.094809	0.127529	0.0760494	-0.0649781	0.004355	0.0588255		-0.0586003	0.184752	0.0526413	-0.260559	-0.0678894	-0.0827518	0.00812387	0.0566251	0.207327	0.148122	0.0862191		0.0192962	-0.15193	0.0431695	0.0242442	-0.0197504	-0.00337448	0.0933942	0.209194	-0.0904626	-0.0128928	-0.0413248	0.00620505	-0.138506		0.0438293
TG-GATES	Rat	Liver	vivo	repeat	TG-RVivoLiverRepeat - bendazac.Middle.8day	Bendazac	M		8d	-0.213834	0.105331		0.148342	0.133494	-0.517774	-0.0513673	0.340002	0.0310991	-0.213664	0.0319298		0.26407	0.367508						0.055242		0.377485	0.0657747	0.101328	-0.197923				-0.423383		0.408744		1.73881					-0.12313	-0.547428	-0.0125257
TG-GATES	Rat	Liver	vivo	repeat	TG-RVivoLiverRepeat - thioridazine.Low.29day	Thioridazine	L		29d	0.0203397	0.105348		0.274316	0.0177598	-0.0518422	0.14439	-0.0388894	0.0694299	0.161909	-0.0248217		-0.0968817	0.0123327						-0.050841		0.232412	-0.0145507	-0.0989197	0.0711659				0.198231		-0.0980691		-0.18929					0.130215	0.0259941	0.00405014
TG-GATES	Rat	Liver	vivo	repeat	TG-RVivoLiverRepeat - trimethadione.High.29day	Trimethadione	H		29d	0.00946281	0.105454		0.662616	1.79503	-0.305601	-0.20086	-1.10635	0.490962	0.551519	-0.512418		-0.0732775	-0.363403						-0.0811335		0.562729	0.163989	0.570846	0.144297				-2.12115		-0.281902		3.7515					0.0804823	-0.599153	-0.0753525
TG-GATES	Rat	Liver	vivo	bolus	TG-RVivoLiverSingle - haloperidol.Middle.9hr	Haloperidol	M		9h	-0.269685	0.105462		-0.189094	0.214718	-0.0360168	0.106675	-0.287536	-0.0730022	-0.171876	-0.0682908		0.0869197	-0.271188						0.0296222		-0.129923	0.074748	0.00984583	-0.150398				0.117385		-0.359744		0.194523					0.0670397	0.0912137	0.00266542
carcinoGENOMICS	Rat	Kidney	vitro	bolus	CX RVitro NRK Dimethylnitrosamine 72h (1mM)	Dimethylnitrosamine	IC10	1000	72h	-0.00889961	0.105588	-0.012291	-0.0125288	0.000839575	0.0726378	-0.0165006	0.221065	0.00259813	0.0703834		-0.00897253	-0.0142683	-0.0133316	-0.0165084			-0.0161379		-0.0653777		0.0480778	-0.00903417	0.0191186	0.108864	0.0270242		-0.0127987	-0.0160967		-0.0102497	0.0521231	-0.0103592	-0.020126		0.0102216	-0.090032	-0.016328	-0.00841709	-0.012495
TG-GATES	Rat	Liver	vivo	bolus	TG-RVivoLiverSingle - flutamide.Low.9hr	Flutamide	L		9h	-0.0321245	0.105646		-0.0511188	-0.103994	0.31955	0.0314117	-0.136806	0.0370559	0.0993268	0.0312763		0.0300247	-0.196121						-0.0344883		-0.216442	-0.0612611	-0.0250622	-0.070873				-0.411099		-0.253612		-0.178186					0.0853164	0.283167	-0.00684098
TG-GATES	Rat	Liver	vivo	bolus	TG-RVivoLiverSingle - nifedipine.Low.24hr	Nifedipine	L		24h	0.130295	0.105747		0.0241439	0.319725	-0.000677855	-0.0814909	0.255259	0.245102	-0.0343917	-0.232931		0.153291	0.250627						-0.163583		0.00316794	0.0680154	-0.0775966	-0.0354586				-0.317476		0.472396		0.655884					0.199888	-0.0389998	-0.0012731
TG-GATES	Rat	Liver	vivo	repeat	TG-RVivoLiverRepeat - trimethadione.Low.8day	Trimethadione	L		8d	-0.0948707	0.105854		-0.144596	-0.150733	0.0242904	0.0500257	-0.276707	0.0345022	0.825464	-0.275668		-0.0213132	0.277354						-0.0385963		0.157684	0.0701557	-0.124556	-0.267168				0.549105		0.0937714		-0.703943					0.15576	0.248756	-0.0555859
TG-GATES	Rat	Liver	vivo	repeat	TG-RVivoLiverRepeat - acetamidofluorene.Middle.4day	Acetamidofluorene	M		4d	-0.0688711	0.105935		0.393227	2.22832	0.376657	0.212939	0.00305192	1.0262	-0.982029	0.484028		0.709069	-0.147482						-0.136572		0.243186	0.0357481	0.0532606	-0.102019				-0.976573		0.393516		3.85032					-0.0259954	-0.131654	-0.138377
TG-GATES	Rat	Liver	vivo	bolus	TG-RVivoLiverSingle - cimetidine.Low.6hr	Cimetidine	L		6h	0.151875	0.105954		-0.0826472	-0.297619	-0.0502422	-0.0281762	0.0470036	-0.00459508	-0.0259674	-0.0322815		-0.159772	1.2645						-0.0187366		-0.232974	0.0645572	-0.106412	0.00850278				-0.127155		-0.193185		-0.12301					0.0883471	0.10016	0.0192741
TG-GATES	Rat	Liver	vivo	repeat	TG-RVivoLiverRepeat - nitrofurantoin.Low.15day	Nitrofurantoin	L		15d	0.0128195	0.105982		-0.0872675	0.0943103	0.135151	0.281369	-0.246612	0.00156638	0.00505388	-0.105207		0.244136	0.748712						-0.119811		-0.211032	-0.061464	0.263153	0.0602508				-0.263455		-0.0305697		0.445055					0.29858	0.0651938	0.0409605
TG-GATES	Rat	Liver	vivo	bolus	TG-RVivoLiverSingle - gentamicin.Low.6hr	Gentamicin	L		6h	0.0435182	0.10614		0.251285	0.0805661	0.411983	0.120604	0.174422	-0.00444203	0.493094	-0.0108887		-0.0949258	-0.11436						0.154975		0.0438216	0.0610059	0.125276	0.135721				-0.985749		-0.0945982		-0.0679434					0.0123536	0.0454189	-0.00850982
TG-GATES	Rat	Liver	vivo	bolus	TG-RVivoLiverSingle - disulfiram.Low.24hr	Disulfiram	L		24h	0.121175	0.106265		-0.816972	0.441921	0.106419	0.0498072	-0.20786	0.00617391	-0.299532	-0.13317		-0.287779	0.196359						-0.168234		-0.254686	-0.0444971	-0.23453	-0.270259				-1.8472		-0.135115		0.263145					0.00474068	0.0400275	-0.0442875
TG-GATES	Rat	Liver	vivo	repeat	TG-RVivoLiverRepeat - diltiazem.Low.15day	Diltiazem	L		15d	-0.106248	0.106332		-0.0162111	-0.187272	-0.0291171	-0.0796121	0.321504	-0.00785766	0.392393	0.00804042		-0.0913168	-0.0891967						-0.0580319		-0.096194	0.164022	-0.0149925	-0.04897				-0.225007		0.280528		0.296579					0.0271359	-0.241117	-0.0233245
TG-GATES	Human	Liver	vitro	bolus	TG-HVitro PHH - caffeine.Middle.24hr	Caffeine	M		24h	-0.30218	0.106344	-0.155092	0.218811	0.429021	-0.420675	0.0106841	0.0923438	-0.0134314	-0.0896644	0.154431	-0.0758186		0.527215	-0.00543963	-0.00904575	-0.12525	-0.0954332	0.0251924	-0.0413728	-0.27368	-0.111235	-0.0782957	0.0662665		0.255218	-0.23908	0.0640309	0.260009	0.109383	0.12807	-0.0895959	-0.222489	0.199684	0.0408661	-0.102771	0.075881	-0.0761628		0.167607
TG-GATES	Rat	Liver	vivo	bolus	TG-RVivoLiverSingle - ticlopidine.Middle.3hr	Ticlopidine	M		3h	0.154279	0.106492		0.106656	0.259374	-0.0812953	-0.190225	0.253574	0.14085	-0.24188	0.142439		0.151744	0.464659						-0.0208389		1.10317	-0.283688	0.200043	-0.0214127				0.368735		-0.0788533		-0.110242					0.0459166	-0.230951	-0.0619901
TG-GATES	Rat	Liver	vitro	bolus	TG-Rvitro PRH - omeprazole.Low.24hr	Omeprazole	L		24h	-0.00426147	0.106498		0.0190753	0.113595	0.0634656	-0.104463	-0.0204426	-0.0636136	0.135483	0.0757694	-0.101378	-0.0112116	0.0581245	-0.0579841	0.0116802			0.105042	0.017667	-0.0396041	0.0579021	-0.0439891	0.000589111	0.0526294				0.0276562		-0.373886		-0.00703299				-0.043778	-0.051571	-0.0739365	0.0269376
TG-GATES	Rat	Liver	vivo	repeat	TG-RVivoLiverRepeat - propranolol.Middle.4day	Propranolol	M		4d	-0.177171	0.106508		0.0101752	0.417683	0.270078	0.326819	-0.102325	-0.123001	-0.0472312	0.135167		0.0764128	-0.149248						-0.0251889		0.10758	-0.0313466	0.172116	-0.0406776				0.0587928		0.270931		0.417177					-0.0839761	-0.327158	0.0254311
TG-GATES	Human	Liver	vitro	bolus	TG-HVitro PHH - indomethacin.Low.24hr	Indomethacin	L		24h	0.0269872	0.106606	0.0369787	-0.0726555	-0.0269657	0.00472506	-0.0910739	0.115802	-0.192707	-0.0794412	0.124264	0.112799		-0.0437295	-0.215012	-0.0904183	-0.0414185	0.0469247	0.00166767	0.0921023	0.276067	0.0855472	-0.131093	0.00426988		0.0968893	-0.0130563	-0.00809859	-0.00310196	-0.0189499	-0.0047951	-0.0441896	-0.035758	-0.00345496	-0.11729	0.00169479	0.0577141	-0.038105		-0.0456781
TG-GATES	Rat	Liver	vivo	bolus	TG-RVivoLiverSingle - rotenone.High.6hr	Rotenone	H		6h	-0.0489643	0.10666		-0.133062	0.431656	-0.1724	0.128638	-0.102181	-0.0554225	0.0714173	0.111654		0.328981	0.825216						0.0117556		-0.113123	-0.114873	0.124173	0.107458				0.126478		-0.0307384		0.546881					0.00664681	-0.169486	-0.00282183
TG-GATES	Rat	Liver	vivo	repeat	TG-RVivoLiverRepeat - bromoethylamine.Low.8day	Bromoethylamine	L		8d	-0.0915607	0.106732		-0.196188	0.180904	-0.130809	0.10825	0.0415422	-0.0010781	-0.190929	0.117703		0.20854	-0.615621						-0.0554903		0.055401	-0.078764	-0.0626866	-0.190479				-1.13209		0.0288072		1.46613					0.150737	-0.128342	0.00277148
TG-GATES	Human	Liver	vitro	bolus	TG-HVitro PHH - benziodarone.High.24hr	Benziodarone	H		24h	0.0804877	0.106753	0.197559	0.750745	0.183537	-0.211407	-0.209122	0.297379	0.00816729	0.31676	-0.0988895	-0.0141033		0.0409127	-0.0375559	0.0356807	0.20431	-0.123998	-0.00433685	0.169659	0.388447	0.106744	0.166613	0.136912		0.0558489	0.0894805	0.720502	0.193896	0.2215	0.237194	-0.165506	0.112778	-0.0253143	-0.0357677	-0.0490494	0.0612455	-0.12425		0.0359447
TG-GATES	Rat	Liver	vivo	repeat	TG-RVivoLiverRepeat - tolbutamide.Low.29day	Tolbutamide	L		29d	0.0347049	0.107002		-0.111584	-0.0388999	0.198979	0.279106	0.65187	0.00485491	-0.102956	0.143666		-0.204717	0.824966						-0.032125		0.252097	0.025433	-0.166432	-0.00422258				0.444346		0.0590693		-0.488095					-0.172794	-0.273323	0.0497073
TG-GATES	Rat	Kidney	vivo	bolus	TG-RVivoKidneySingle - cephalothin.Low.3hr	Cephalothin	L		3h	0.000643987	0.107052	-0.126789	0.4442	0.0599623	0.334023	0.104634	0.02556	-0.0188303	0.244247	-0.00403674	-0.0314983	-0.0473301	-0.0920563		-0.0346924			0.0278056	-0.150874	0.0303672	-0.214377	0.0873376	-0.0534608	-0.235064				0.461056		0.147136		0.127828				-0.136531	0.181816	-0.10719	-0.0869844
TG-GATES	Rat	Liver	vivo	bolus	TG-RVivoLiverSingle - theophylline.Middle.3hr	Theophylline	M		3h	-0.083627	0.107067		-0.211114	-0.276089	-0.391213	-0.0179267	0.00995105	-0.0318908	-0.0181238	-0.0440126		0.132504	-0.325799						-0.0465431		0.975677	0.141169	-0.151211	0.187255				0.748401		-0.213062		-0.522767					0.0500851	-0.86362	0.0256538
TG-GATES	Rat	Liver	vitro	bolus	TG-Rvitro PRH - lornoxicam.Middle.2hr	Lornoxicam	M		2h	0.0224232	0.107101		0.0475182	0.264272	-0.10817	0.131068	-0.324831	-0.0790027	-0.150309	-0.160972	0.0552787	0.164961	-0.166858	-0.158817	-0.0679581			0.0201476	-0.130404	-0.00181524	0.079427	-0.0115476	-0.105624	0.139465				0.330083		-0.11771		-0.0322725				-0.0864118	0.107465	0.0976965	-0.021722
TG-GATES	Rat	Liver	vivo	bolus	TG-RVivoLiverSingle - doxorubicin.High.24hr	Doxorubicin	H		24h	-0.23249	0.107106		-0.674107	0.0520756	-0.390916	-0.0408639	-0.0748656	0.328392	-0.84432	0.220738		0.253629	-0.347895						-0.157585		0.263137	-0.0416092	0.224283	-0.124201				-0.670376		0.100748		0.862847					0.195148	0.379996	-0.017791
TG-GATES	Rat	Kidney	vivo	repeat	TG-RVivoKidneyRepeat - captopril.Middle.4day	Captopril	M		4d	-0.108415	0.107128	0.00146498	-0.00335541	0.246525	-0.0884685	-0.00691281	-0.0190618	-0.0257055	-0.0875272	0.0197901	-0.285921	0.0602287	0.541611		-0.125358			-0.069114	-0.0370456	0.031884	-0.0572804	-0.139859	-0.101745	0.0271617				-0.56879		-0.0852172		-0.0675688				-0.0453824	-0.0768184	0.0681073	0.200436
TG-GATES	Rat	Liver	vivo	bolus	TG-RVivoLiverSingle - 2,4-dinitrophenol.Middle.6hr	2,4-dinitrophenol	M		6h	0.0122723	0.107167		0.326322	-0.444794	0.0147269	0.0163695	-0.128647	0.13265	0.0774839	-0.0611753		0.140873	0.432597						-0.0265576		0.20952	0.127245	-0.187426	0.199504				0.469768		-0.347968		-0.320527					-0.118883	0.587723	0.00167727
TG-GATES	Rat	Liver	vivo	bolus	TG-RVivoLiverSingle - buthionine sulfoximine.Low.24hr	Buthionine sulfoximine	L		24h	0.126126	0.107259		-0.135223	-0.0473658	-0.230857	0.0868643	0.261148	-0.0554994	-0.554097	0.287441		-0.0827064	-0.0507914						-0.0304466		-0.604436	0.153287	0.217539	0.0444276				0.761556		0.448405		0.532233					-0.0618298	0.448817	-0.0189252
TG-GATES	Rat	Liver	vitro	bolus	TG-Rvitro PRH - meloxicam.Low.24hr	Meloxicam	L		24h	-0.040418	0.107295		0.0440256	0.173265	0.114493	-0.17936	-0.0142137	-0.0121428	-0.276344	-0.0602182	-0.0137703	0.0507556	-0.0288021	-0.0685546	-0.057821			0.127773	0.182389	0.0223118	0.174075	0.0347169	0.274227	0.162117				-0.138605		0.246942		-0.0943924				-0.096782	0.144689	0.316838	-0.0133604
TG-GATES	Rat	Liver	vivo	repeat	TG-RVivoLiverRepeat - erythromycin ethylsuccinate.High.29day	Erythromycin	H		29d	-0.193072	0.107299		0.2411	0.238235	-0.488467	0.0578771	0.275957	-0.0898319	-0.095173	-0.124012		0.125389	-0.133165						0.15114		1.122	-0.0781649	0.102934	-0.0130804				0.326495		0.0631771		0.971443					-0.0970798	-0.466977	-0.0165087
TG-GATES	Rat	Liver	vivo	bolus	TG-RVivoLiverSingle - metformin.Low.9hr	Metformin	L		9h	0.0632905	0.107339		0.0343728	-0.209839	0.14168	-0.000565239	0.0381915	-0.0384732	-0.0339033	0.0516706		-0.109513	-0.123073						-0.129659		0.231347	0.0728829	0.119164	0.00422525				0.0977374		-0.241595		-0.340714					-0.0927981	-0.15263	-0.00102352
TG-GATES	Rat	Liver	vivo	bolus	TG-RVivoLiverSingle - methyltestosterone.Middle.6hr	Methyltestosterone	M		6h	0.0116432	0.107374		-0.157213	0.0195192	-0.37656	0.164471	0.425442	0.168533	-0.224158	-0.0332884		-0.139542	-0.0329822						0.0338002		0.52284	0.041734	-0.0287348	0.256504				-0.472684		-0.190934		-0.123132					-0.0384142	0.0426702	-0.0192281
TG-GATES	Rat	Liver	vivo	bolus	TG-RVivoLiverSingle - chloramphenicol.Middle.3hr	Chloramphenicol	M		3h	0.0165388	0.107431		-0.131133	-0.167336	-0.0823188	0.0146165	-0.204301	0.0778538	0.063358	-0.0246005		0.0525424	-0.0735011						-0.0230297		0.435904	0.0297544	-0.0494853	0.00203035				-0.146236		0.0562837		-0.259508					-0.0104229	-0.249299	-0.00828858
TG-GATES	Rat	Liver	vivo	bolus	TG-RVivoLiverSingle - haloperidol.High.9hr	Haloperidol	H		9h	-0.266682	0.107671		-0.586098	0.177397	0.126088	0.0188375	-0.421654	-0.103833	0.0765343	0.118384		0.0385375	-0.499277						0.0712677		-0.145447	-0.0411012	0.21036	-0.119896				-0.125907		-0.394135		0.0900915					-0.0242554	0.0633925	0.0301993
TG-GATES	Rat	Liver	vivo	bolus	TG-RVivoLiverSingle - pemoline.Low.3hr	Pemoline	L		3h	-0.0734445	0.107839		-0.265445	-0.30914	-0.147876	-0.035654	-0.0453821	0.0225453	0.105246	-0.0449334		0.162365	-0.218663						-0.0700019		-0.226569	-0.0211664	-0.130238	-0.0172512				-0.110699		0.18411		-0.220053					0.0472333	0.0368455	0.0104584
TG-GATES	Rat	Liver	vivo	repeat	TG-RVivoLiverRepeat - nimesulide.Middle.15day	Nimesulide	M		15d	0.0999704	0.107942		-0.100435	0.21026	0.19706	-0.18697	-0.134705	-0.011724	0.289024	-0.0858314		0.114232	-0.134764						0.0200174		0.101591	-0.0138398	-0.154787	-0.0861831				-0.262922		-0.0557063		0.868166					0.0709037	-0.105459	-0.0170399
TG-GATES	Rat	Liver	vivo	bolus	TG-RVivoLiverSingle - disopyramide.Middle.24hr	Disopyramide	M		24h	-0.129154	0.108		-0.0985142	0.257431	-0.0825475	0.0410357	-0.412685	0.091498	0.364954	0.159984		0.154471	0.134069						-0.257116		0.445052	0.0586893	0.122489	-0.106839				0.398595		-0.0320539		1.14851					0.21636	0.208446	-0.00930158
TG-GATES	Rat	Liver	vivo	repeat	TG-RVivoLiverRepeat - fluphenazine.High.15day	Fluphenazine	H		15d	0.0141199	0.108105		0.0077503	0.305176	-0.128511	-0.182415	-0.156945	0.0720665	0.146587	-0.089496		-0.148737	-0.341454						0.0817553		0.151767	-0.11699	0.76251	-0.135772				0.0894522		0.17524		2.38081					-0.0338216	-0.140134	-0.0385252
TG-GATES	Rat	Liver	vitro	bolus	TG-Rvitro PRH - ethambutol.Middle.2hr	Ethambutol	M		2h	0.0683062	0.108318		-0.168196	-0.111641	0.193283	-0.102386	-0.250475	-0.0435268	0.0197836	-0.0434752	0.0898551	-0.0292756	-0.173237	-0.0490922	0.160424			0.121929	0.184165	0.00482803	-0.355043	-0.119102	0.301547	0.112371				0.17463		-0.454476		0.00427692				-0.113434	0.070734	-0.0992331	0.0640719
TG-GATES	Rat	Kidney	vivo	repeat	TG-RVivoKidneyRepeat - valproic acid.Middle.4day	Valproic acid	M		4d	-0.0152337	0.108328	0.0206667	0.213931	-0.00399509	-0.021659	0.0950222	0.122199	-0.0480533	0.000749803	0.138256	-0.177126	0.00366226	0.0987711		-0.0268757			-0.0171368	-0.0409004	0.116983	0.165204	0.10572	-0.0788155	-0.0124472				0.207156		0.00707701		0.0624447				-0.059431	-0.197942	0.106793	-0.137251
TG-GATES	Human	Liver	vitro	bolus	TG-HVitro PHH - diclofenac.High.2hr	Diclofenac	H		2h	0.101664	0.108425	0.302339	0.0190289	0.135825	-0.051281	0.0774889	0.0789744	-0.0219572	0.0200025	0.298946	0.234471		-0.055576	0.00257432	0.0625426	0.0728548	0.0341324	0.00568509	-0.0548327	-0.0605902	0.161582	-0.277832	-0.0647849		0.0904443	0.215015	0.0512429	0.100449	0.0245068	0.0520093	0.026603	0.180679	-0.00880132	0.0708069	-0.00361825	0.0168193	-0.0677509		0.0317114
TG-GATES	Rat	Liver	vivo	repeat	TG-RVivoLiverRepeat - amitriptyline.High.8day	Amitriptyline	H		8d	0.0521407	0.108505		0.0952732	4.1847	0.910988	0.0376579	-0.207508	0.176719	-0.372861	0.104686		0.35861	-0.283798						0.003709		1.24092	0.046494	0.553409	0.193545				-0.92011		-1.03232		3.56608					0.0123411	-0.224582	0.00785931
TG-GATES	Rat	Liver	vivo	bolus	TG-RVivoLiverSingle - bromoethylamine.High.9hr	Bromoethylamine	H		9h	0.0471401	0.108599		-1.39634	0.221305	0.0574097	0.0895096	-0.831407	-0.129779	0.0894589	-0.159102		0.479451	0.173464						0.0748143		-0.11476	0.117424	0.0342357	-0.147669				-0.999214		-0.143334		-0.375249					0.0269806	-0.795591	-0.0194557
TG-GATES	Human	Liver	vitro	bolus	TG-HVitro PHH - clofibrate.Middle.24hr	Clofibrate	M		24h	0.124657	0.108637	-0.0727417	0.0511796	0.0520996	-0.264079	-0.0659264	0.0962489	-0.0480593	0.00999076	0.0166555	-0.107128		-0.0111325	0.245947	0.0897601	0.086741	-0.059321	0.103357	0.0138269	0.122855	-0.196379	-0.0877318	0.0811675		-0.0683237	0.0155107	-0.0482073	-0.0321775	0.00860607	-0.0462026	0.0842096	-0.0972633	-0.169749	0.0274738	-0.0194742	-0.0623922	0.038832		0.0555136
TG-GATES	Rat	Liver	vitro	bolus	TG-Rvitro PRH - chloramphenicol.Middle.8hr	Chloramphenicol	M		8h	0.00787062	0.108686		-0.0226839	-0.117776	-0.14514	-0.0724773	-0.232658	-0.0304947	0.235814	-0.00290495	0.025413	7.09375e-05	0.0866823	-0.0778618	0.072164			-0.0284047	-0.0838502	0.00287289	-0.137695	-0.0702733	-0.185793	-0.0124095				-0.0101578		-0.0205677		-0.00419808				-0.0235692	-0.120428	0.0750414	0.0560332
TG-GATES	Human	Liver	vitro	bolus	TG-HVitro PHH - allyl alcohol.Middle.2hr	Allyl alcohol	M		2h	-0.0969628	0.108783	-0.0719112	0.114702	0.0665026	0.108303	-0.0402033	-0.0901006	-0.109809	-0.0571612	0.127026	0.066855		0.0900645	0.18004	-0.0472749	0.0538729	0.143214	-0.0966085	-0.0858292	-0.0589451	0.0785483	-0.0251016	-0.11193		-0.0722757	0.0640569	0.19222	0.0164458	0.0619753	0.135814	-0.0453449	0.130338	0.0287469	-0.0697606	0.0177703	0.141842	0.0563886		-0.0194583
TG-GATES	Rat	Liver	vitro	bolus	TG-Rvitro PRH - galactosamine.Middle.24hr	Galactosamine	M		24h	-0.402817	0.108836		-0.147123	-0.477743	-2.04477	0.299052	-0.23398	0.431376	-0.413156	0.64465	-0.411886	-1.11383	0.818006	-0.083961	0.377575			-0.852652	-1.31338	0.125336	-0.0710504	-0.181824	-0.181491	-0.548384				0.431263		1.14722		0.410345				-0.533184	-0.190761	0.775765	0.2336
TG-GATES	Rat	Liver	vivo	repeat	TG-RVivoLiverRepeat - amitriptyline.Middle.4day	Amitriptyline	M		4d	0.187045	0.10905		0.346837	0.231081	0.252465	-0.352898	-0.169019	-0.0299434	0.0573416	0.209237		0.118563	-0.166158						-0.059035		0.795212	0.0123348	0.213881	0.0532542				0.116129		-0.186209		0.825863					-0.0569845	-0.152699	-0.0229854
TG-GATES	Rat	Liver	vivo	bolus	TG-RVivoLiverSingle - ranitidine.Middle.3hr	Ranitidine	M		3h	-0.0354623	0.109138		0.389054	-0.172956	-0.189674	-0.109536	0.0344427	0.110837	0.272519	-0.130968		0.120205	0.234553						-0.132818		0.129017	-0.0550839	-0.226165	0.0639232				-0.896271		-0.164151		-0.203694					-0.228451	0.109484	0.0118897
TG-GATES	Rat	Liver	vivo	repeat	TG-RVivoLiverRepeat - methapyrilene.High.15day	Methapyrilene	H		15d	0.590318	0.109219		2.02091	3.99821	3.27138	0.533607	-0.469126	0.730767	-1.00603	-0.500073		3.49182	-2.00314						0.505838		0.495609	-0.201938	-0.261039	-0.011612				-4.40651		-3.33591		4.81791					-0.197394	-2.9617	-0.522038
TG-GATES	Rat	Liver	vivo	bolus	TG-RVivoLiverSingle - propranolol.High.9hr	Propranolol	H		9h	0.197558	0.109387		-0.0674163	0.451679	0.248854	-0.196684	-0.397291	0.208734	0.0740838	-0.0832042		0.353905	-0.263223						-0.0125657		0.2324	-0.0579289	0.358535	0.0380268				0.293187		-0.335903		0.643255					-0.0640673	0.0953684	0.00734488
TG-GATES	Rat	Liver	vivo	repeat	TG-RVivoLiverRepeat - phenylbutazone.Low.4day	Phenylbutazone	L		4d	-0.0216184	0.109423		-0.0081625	0.0752684	-0.158333	-0.0438175	0.635247	0.0394594	0.0685938	-0.0210571		-0.164202	-0.0594874						-0.0324401		0.0936985	-0.0236867	-0.0658361	-0.018666				-0.613731		0.115264		0.315845					0.0751146	-0.529652	0.0139973
TG-GATES	Rat	Kidney	vivo	bolus	TG-RVivoKidneySingle - carboplatin.Low.3hr	Carboplatin	L		3h	0.0638019	0.109464	0.00536828	0.147519	0.110351	-0.240555	-0.0605071	0.00921185	0.0839449	0.0584834	-0.00655428	-0.0310761	-0.00970972	0.191795		0.00418522			0.124464	-0.0328485	-0.0402966	0.152579	0.0954293	-0.0454979	0.0463427				-1.10144		-0.0647073		0.0646985				0.0504544	-0.0716376	-0.0574868	0.0581934
TG-GATES	Human	Liver	vitro	bolus	TG-HVitro PHH - simvastatin.Middle.8hr	Simvastatin	M		8h	0.0469389	0.109491	0.00468886	0.237194	-0.00855379	-0.0496816	0.0142847	0.109686	-0.00729779	0.292853	-0.10433	-0.126007		0.091569	0.106594	0.0677564	-0.0368091	-0.0553619	-0.0237057	0.0955042	0.09139	0.1476	-0.0111803	0.108914		-0.165407	-0.0932725	0.440801	0.0671078	0.0883251	0.0631566	-0.0345379	0.00964894	-0.0492365	-0.0567334	-0.000734898	-0.03851	-0.0333844		0.0927134
TG-GATES	Rat	Liver	vivo	bolus	TG-RVivoLiverSingle - tolbutamide.Middle.24hr	Tolbutamide	M		24h	-0.0386303	0.109575		-0.00589069	-0.0558796	-0.178421	-0.000930352	0.0155894	0.0926473	0.158265	0.00447439		-0.00915467	-0.0787778						-0.102119		0.225113	0.117179	0.0276937	0.0588529				1.59146		0.230682		0.223212					-0.104517	-0.262501	-0.00291844
PREDICT-IV	Rat	Liver	vitro	repeat	PIV Rvitro Repeat PRH - CHLPRZ_LD14_LFC	Chlorpromazine	L		14d	0.125993	0.10969	-0.0419179	0.0281419	-0.0487196	-0.00865571	-0.0288837	0.132059	-0.0418616	-0.223346		-0.00780898	-0.429668	0.0972961	0.0606849	0.0258959	-0.0374605	-0.0722406	0.0282121	-0.0631151	-0.0298087	0.263311	0.0222343	-0.0583068	0.0890886	-0.0453206	-0.0181385	0.28438	0.0542935		0.0165114	-0.0486806	-0.0698843	0.0383691		0.023172	0.0237962	-0.0164875	0.0595429	0.0299489
TG-GATES	Human	Liver	vitro	bolus	TG-HVitro PHH - propylthiouracil.Low.2hr	Propylthiouracil	L		2h	-0.0282922	0.109771	-0.13392	-0.115269	-0.000668491	0.175424	0.0420426	0.0802131	0.0608012	-0.0117914	0.138013	0.153598		-0.0505154	-0.153457	-0.11585	-0.303789	0.146959	-0.0417789	-0.0480849	0.137102	0.296295	-0.209726	-0.0158996		-0.114205	-0.00103528	-0.0374662	-0.00452645	-0.0343463	0.0090011	0.102097	0.0368385	0.0212226	-0.131047	0.0105277	0.0551712	-0.160351		0.00158692
TG-GATES	Rat	Liver	vivo	repeat	TG-RVivoLiverRepeat - simvastatin.Middle.4day	Simvastatin	M		4d	-0.13015	0.109839		0.0211418	0.423286	-0.108532	0.101806	0.152406	0.247805	-0.210959	-0.12428		0.851921	0.311047						0.00211548		0.585001	0.155796	-0.0251724	-0.192043				-0.135193		0.258126		1.27659					0.122691	-0.0887391	-0.0492768
TG-GATES	Rat	Liver	vitro	bolus	TG-Rvitro PRH - naproxen.Middle.2hr	Naproxen	M		2h	-0.0627806	0.10989		-0.0644214	0.0780243	0.197104	0.124909	-0.0544162	-0.00725261	-0.181616	0.040024	0.0117719	0.443397	0.0201191	0.00830656	-0.120748			0.137194	0.0151473	0.160226	-0.209711	0.039181	-0.00115454	0.0435182				0.148107		0.422185		0.123784				-0.0356187	0.00896074	-0.0138719	-0.00470002
TG-GATES	Rat	Liver	vivo	repeat	TG-RVivoLiverRepeat - acetazolamide.Middle.15day	Acetazolamide	M		15d	0.0656769	0.109906		0.0243747	0.187531	-0.424143	-0.0894567	-0.0321573	-0.0345932	0.122108	0.124398		-0.0791221	-0.106152						-0.0525302		-0.263991	0.0867448	-0.332061	-0.119003				0.505001		0.240444		0.884225					0.099214	0.154149	0.00430033
TG-GATES	Human	Liver	vitro	bolus	TG-HVitro PHH - meloxicam.Middle.24hr	Meloxicam	M		24h	0.0639812	0.109933	-0.101182	0.235413	0.128627	-0.0935766	0.0419955	0.0509497	0.0615346	-0.0116058	-0.0344962	-0.041968		0.0852519	0.0119634	-0.00518356	-0.104048	0.0294924	0.088816	-0.0239263	-0.00289114	-0.00241583	0.0831396	0.0638697		-0.0225083	0.0832212	-0.00259529	0.0113104	-0.00425977	-0.0174952	0.0808178	-0.0286706	0.101558	0.0102462	0.0331915	0.0218646	0.0804273		-0.0189045
TG-GATES	Rat	Liver	vitro	bolus	TG-Rvitro PRH - phalloidin.Low.2hr	Phalloidin	L		2h	0.045111	0.109965		-0.0347227	0.169347	-0.0856985	-0.10883	-0.0634794	-0.0647692	-0.0315939	-0.0623426	-0.0820452	0.05612	0.0131229	0.0245692	0.165847			0.0163166	-0.0191965	0.0294747	-0.039742	-0.0262039	-0.0346272	0.142831				-0.243959		-0.0352448		-0.0728539				0.00639873	0.102062	0.0314825	0.0265213
TG-GATES	Rat	Liver	vivo	repeat	TG-RVivoLiverRepeat - bromoethylamine.Middle.8day	Bromoethylamine	M		8d	-0.0622287	0.109989		0.0809655	0.496425	-0.312047	0.0780639	-0.189933	0.16027	-0.338699	0.206682		0.0575443	0.0190615						-0.0136706		0.292597	-0.127938	0.0763568	-0.211981				0.308832		-0.0777327		1.61896					0.0601631	-0.286158	0.0360948
TG-GATES	Rat	Liver	vivo	repeat	TG-RVivoLiverRepeat - ketoconazole.High.8day	Ketoconazole	H		8d	-0.0908198	0.110131		0.058939	0.514226	0.0691394	0.19981	-0.341997	0.162523	-0.158099	-0.144423		0.0911145	0.238376						-0.055056		1.13668	0.0390247	-0.0449207	0.0147651				0.21203		0.159636		1.22653					0.271568	-0.237538	-0.0344123
TG-GATES	Rat	Liver	vitro	bolus	TG-Rvitro PRH - iproniazid.Low.8hr	Iproniazid	L		8h	-0.00256642	0.110137		-0.0544238	0.136933	-0.0964297	-0.0478176	-0.0435879	0.029405	-0.0233747	-0.0586006	0.190851	-0.00880112	-0.0197054	0.0960448	0.0682251			-0.0460495	-0.0708087	-0.0775427	-0.0320112	0.0802732	0.0949072	0.016746				-0.0881908		-0.214121		-0.070457				-0.0462825	-0.0455412	-0.0778885	-0.0399834
TG-GATES	Rat	Liver	vitro	bolus	TG-Rvitro PRH - papaverine.Middle.2hr	Papaverine	M		2h	-0.0372023	0.110155		0.191115	-0.324025	-0.123968	0.0838731	0.0543526	-0.0128222	0.0262527	-0.052955	0.0948161	0.126239	0.121666	0.0608839	0.0752267			-0.0231295	-0.0973265	0.122778	-0.440358	-0.0104298	-0.239004	-0.0450623				0.0954372		0.421636		0.158144				0.0410285	0.0524815	0.0761264	0.0415579
TG-GATES	Human	Liver	vitro	bolus	TG-HVitro PHH - iproniazid.Middle.24hr	Iproniazid	M		24h	0.109541	0.110481	-0.273414	0.228681	0.15115	0.0125133	0.0369506	-0.0329336	0.221783	-0.0654996	-0.198312	-0.365027		-0.0291491	0.1573	0.0149105	0.2065	-0.096657	0.0553892	0.129972	-0.188233	-0.244591	-0.0808516	0.0910292		-0.172204	0.192869	0.00913383	0.0574466	0.010724	0.0222386	0.131962	-0.148214	0.214132	-0.0564951	0.0127066	-0.0421137	0.13069		0.0176679
TG-GATES	Rat	Liver	vivo	bolus	TG-RVivoLiverSingle - caffeine.Low.6hr	Caffeine	L		6h	-0.0400302	0.110497		-0.139669	-0.142055	-0.153531	0.059974	-0.229725	-0.0626076	-0.0298367	0.0440371		-0.103075	0.139711						-0.124203		0.00557581	-0.0698467	-0.0295359	0.0691017				0.88561		-0.0980486		-0.398303					0.0517084	-0.0746564	-0.00217712
TG-GATES	Rat	Liver	vivo	bolus	TG-RVivoLiverSingle - phenylbutazone.High.6hr	Phenylbutazone	H		6h	0.0351656	0.110517		0.404434	0.194099	0.146846	0.0766586	-0.680572	0.208983	0.186907	-0.101352		0.267348	0.131723						-0.236882		0.342639	0.0456716	0.0703932	0.115694				-0.491084		-0.105021		0.729776					0.178399	-0.191722	-0.00743965
PREDICT-IV	Human	Liver	vitro	repeat	PIV Hvitro Repeat PHH - CICLOSP_LD14_LFC	Cyclosporine A	L		14d	0.34334	0.110767	0.125149	0.238443	0.0612693	-0.334997	0.428938	0.26351	-0.0500781	0.196605	0.313021	0.130528	0.703672	0.493809	-0.0782333	0.992513	0.175594	0.0587151	0.537363	-0.189356	-0.256417	-0.0307778	0.15417	0.120344	0.114803	-0.173074	0.445619	-0.370428	0.0225469	0.665291	0.282449	0.0398058	-0.560867	0.0663949	-0.249378	-0.0207663	0.335323	0.0612263	0.556454	0.189985
TG-GATES	Rat	Liver	vivo	repeat	TG-RVivoLiverRepeat - ethambutol.Low.4day	Ethambutol	L		4d	0.0766841	0.110867		0.0962037	-0.0401803	-0.208283	0.23795	0.119261	-0.0405606	-0.295907	0.177942		0.264427	-0.199056						-0.195641		0.119718	0.016936	0.111621	-0.0276913				0.921208		0.233152		1.03874					-0.11835	-0.511691	-0.0201836
TG-GATES	Rat	Liver	vivo	repeat	TG-RVivoLiverRepeat - ibuprofen.Middle.8day	Ibuprofen	M		8d	-0.0422296	0.111009		-0.0772189	-0.0662312	0.0815023	-0.0633256	-0.0226971	0.0137642	0.102202	-0.025049		-0.206268	-0.0595605						-0.117003		0.266681	0.01421	-0.204666	0.00694081				-0.589044		-0.0348037		-0.0954504					0.0669967	-0.242587	-0.00391303
TG-GATES	Rat	Liver	vivo	bolus	TG-RVivoLiverSingle - doxorubicin.Middle.24hr	Doxorubicin	M		24h	-0.132609	0.111118		-0.269016	-0.0375822	-0.160837	0.0342799	0.110412	0.0932447	-0.0716498	0.0947523		-0.156169	0.00931245						0.0634178		0.215387	0.124934	0.0843805	-0.0864303				-0.994686		0.3038		0.148754					0.194877	0.199325	-0.010659
TG-GATES	Rat	Kidney	vivo	repeat	TG-RVivoKidneyRepeat - captopril.Middle.8day	Captopril	M		8d	-0.076228	0.111173	-0.0300067	1.03144	0.303527	-0.200252	0.162523	-0.105763	0.00820554	0.235907	-0.0917666	0.0598108	0.128234	0.271648		0.220251			-0.0737018	-0.102982	0.0423542	0.15479	-0.055211	0.267841	0.143844				-0.513336		-0.0494112		0.0241057				-0.0204758	0.144323	0.25746	0.0851412
TG-GATES	Rat	Liver	vivo	repeat	TG-RVivoLiverRepeat - triazolam.High.29day	Triazolam	H		29d	-0.0853109	0.111237		0.129217	0.661237	-0.29185	-0.0760121	-0.0799045	0.113142	-0.311598	-0.169988		0.218863	-0.0520505						0.0235656		0.183074	-0.0924611	0.0814208	-0.0749285				-0.095359		0.0941092		2.2519					0.0604375	0.383828	-0.00384362
TG-GATES	Rat	Kidney	vivo	repeat	TG-RVivoKidneyRepeat - acetazolamide.Low.29day	Acetazolamide	L		29d	-0.0216329	0.111275	0.0478063	-0.019076	-0.0749684	-0.11984	-0.169518	0.0317877	0.0313311	-0.0967637	-0.0404349	-0.137306	-0.0857052	-0.152951		-0.226131			0.0282456	-0.134674	-0.0308686	0.0169155	-0.163054	0.0780386	-0.0374423				1.10424		-0.131233		0.104892				0.0435908	-0.0954651	0.0611073	0.104277
TG-GATES	Rat	Liver	vivo	repeat	TG-RVivoLiverRepeat - bendazac.Middle.29day	Bendazac	M		29d	0.0290448	0.1113		-0.302348	0.026209	0.138114	0.212969	0.273767	0.281188	-0.245858	-0.0727229		0.312546	-0.0134028						-0.00795655		0.276201	0.0583504	-0.0370428	0.0868286				0.342283		-0.0236551		1.00901					0.0230377	-0.0146157	0.0157465
TG-GATES	Rat	Liver	vivo	bolus	TG-RVivoLiverSingle - amitriptyline.Middle.24hr	Amitriptyline	M		24h	-0.0636116	0.111377		0.232487	0.335585	-0.0537073	0.00351831	-0.369442	-0.0917795	-0.102474	-0.00023839		0.135393	-0.551616						-0.120575		0.174866	0.0328881	0.334088	-0.056648				-0.25056		0.0122554		0.247112					0.00688484	-0.209441	-0.010295
TG-GATES	Rat	Liver	vivo	repeat	TG-RVivoLiverRepeat - chlorpromazine.High.29day	Chlorpromazine	H		29d	-0.212321	0.111406		0.158719	0.559016	-0.0251667	0.0107619	-0.240329	0.0389801	0.138715	-0.0187794		0.0408353	0.0854619						0.0822402		0.295231	0.015316	0.529964	-0.198508				0.0097706		-0.034842		1.68406					-0.00689708	0.450442	0.0569294
TG-GATES	Rat	Liver	vivo	repeat	TG-RVivoLiverRepeat - azathioprine.Low.15day	Azathioprine	L		15d	-0.0150583	0.111513		-0.366891	0.0247715	0.015976	-0.163333	0.568955	0.0261765	0.146051	-0.0581746		-0.107117	-0.139645						0.0781733		0.688361	0.0869326	-0.352773	-0.0707052				-0.668501		0.188042		0.169652					0.00697624	-0.437628	-0.00454709
TG-GATES	Rat	Kidney	vivo	bolus	TG-RVivoKidneySingle - allopurinol.Low.6hr	Allopurinol	L		6h	0.105892	0.11155	-0.105178	0.24331	0.16695	0.0505176	-0.0907395	-0.0893452	0.104874	-0.0767514	0.0635608	0.0937312	0.0144507	0.253683		-0.312308			0.0493248	-0.0718172	0.169505	0.254285	-0.207975	0.0404736	0.0658043				1.26104		0.0331349		0.0898941				0.0947777	-0.0519039	0.0105876	-0.0693651
TG-GATES	Rat	Liver	vivo	bolus	TG-RVivoLiverSingle - tamoxifen.High.6hr	Tamoxifen	H		6h	0.211475	0.111568		0.173882	-0.371876	-0.100721	-0.172902	0.155145	-0.0320456	0.0238583	0.0448989		0.08513	0.2077						-0.126502		-0.000935061	0.00947861	0.0232469	0.00392842				-0.266067		0.0552398		-0.00709585					0.0801799	-0.0311449	0.073383
TG-GATES	Rat	Liver	vivo	bolus	TG-RVivoLiverSingle - acarbose.High.6hr	Acarbose	H		6h	-0.0641154	0.111578		0.20654	0.3856	-0.584523	-0.0132819	-0.292958	0.14073	-0.361619	-0.0826859		0.170519	-0.109753						-0.0653917		0.0811623	0.108021	-0.127722	0.133715				-0.125057		0.131337		0.44639					-0.0234357	0.243523	-0.00703734
carcinoGENOMICS	Human	Kidney	vitro	bolus	CX HVitro RPTEC 72h - 2NF vs DMSO	2-Nitrofluorene	IC10	60	72h	0.574388	0.111619	0.15545	-1.38075	-0.279503	-0.348228	0.0188389	-1.85961	0.0383139	0.222753	-0.16694	-0.444733		-2.26471	-1.86346	0.0713835	1.15775	-0.17344	-0.257084	0.575233	0.161482	0.0740032	0.0149698	-0.336258		0.372586	0.593699	-0.220982	-0.350255		-0.335346	0.0823545	-0.585272	-0.662296	1.64691	0.41825	0.117477	0.310734	-0.0660539	-0.612733
TG-GATES	Rat	Liver	vivo	repeat	TG-RVivoLiverRepeat - simvastatin.High.4day	Simvastatin	H		4d	-0.0754586	0.111653		-0.900177	0.889364	-0.229606	0.00486636	-0.0719492	0.253088	-0.517186	-0.362016		2.26771	-0.154726						-0.0797829		0.079572	0.0768939	0.00123295	-0.098403				-1.73575		-0.380271		2.04136					0.0952857	-0.144166	-0.108616
TG-GATES	Human	Liver	vitro	bolus	TG-HVitro PHH - WY-14643.Middle.8hr	WY-14643	M		8h	0.145372	0.111819	-0.162119	0.265121	0.181731	-0.0899181	-0.171584	0.313113	-0.103904	0.0583799	0.27476	-0.218459		0.268282	-0.261611	-0.22801	-0.303663	-0.0275257	0.0166911	0.164348	-0.0128545	-0.210312	-0.0426883	0.108076		-0.0132186	-0.0990315	0.0841875	-0.0615162	0.0614729	0.0402916	0.187944	0.0278555	0.100347	-0.064485	0.138869	0.114316	0.107897		-0.0906958
TG-GATES	Rat	Liver	vivo	repeat	TG-RVivoLiverRepeat - ibuprofen.High.29day	Ibuprofen	H		29d	-0.0198588	0.111847		-0.526594	0.238511	-0.155391	-0.0122897	0.784265	0.104312	-0.53962	0.0992716		0.306485	0.127065						0.00521166		0.844384	0.175345	0.178875	0.13408				-2.65195		0.109337		2.1744					0.177923	0.274694	-0.0304671
TG-GATES	Rat	Kidney	vivo	repeat	TG-RVivoKidneyRepeat - gentamicin.Low.29day	Gentamicin	L		29d	-0.163512	0.111885	0.00813366	-0.160151	0.0173031	-0.342568	-0.0993247	0.160594	-0.0520296	0.0599578	-0.097469	0.0993602	-0.0368988	-0.029561		-0.305978			-0.0896641	-0.00899351	0.0318335	-0.0513443	0.113523	-0.0183154	-0.045426				1.02285		0.0655661		-0.00668239				-0.108274	0.198628	0.251463	-0.0612742
TG-GATES	Human	Liver	vitro	bolus	TG-HVitro PHH - omeprazole.Low.24hr	Omeprazole	L		24h	0.064332	0.112009	0.355184	0.55477	0.0359816	0.137547	-0.0710684	0.0144496	0.225856	0.154937	-0.0635763	-0.47772		-0.191752	0.147705	0.103112	0.288779	-0.154646	0.229816	0.303186	0.209921	-0.639656	-0.119288	0.093993		-0.177399	0.176175	0.139473	0.0371551	0.0254826	0.0131989	0.00499178	-0.0278638	0.0556154	0.00949989	0.280984	-0.281875	0.118919		0.0137969
TG-GATES	Rat	Liver	vivo	bolus	TG-RVivoLiverSingle - clofibrate.Middle.6hr	Clofibrate	M		6h	-0.13611	0.112011		-0.0454392	0.0370339	0.254465	-0.0308062	0.134487	0.0855354	0.0292245	-0.08744		1.35226	-0.25919						-0.00906127		-0.678523	-0.0629582	0.393877	0.0276125				-0.431356		-0.0723125		0.720099					-0.0344574	-0.0402477	-0.0248245
TG-GATES	Rat	Liver	vivo	repeat	TG-RVivoLiverRepeat - tamoxifen.Middle.29day	Tamoxifen	M		29d	-0.0147328	0.112114		-0.40668	0.379923	0.0312738	-0.045319	0.612626	0.0241562	-0.0689419	-0.0701068		0.312388	0.0805837						0.0771576		0.208878	0.06884	0.659117	-0.0617826				-0.680671		0.71162		1.67352					0.0164319	0.251009	0.0292631
TG-GATES	Rat	Liver	vivo	bolus	TG-RVivoLiverSingle - rosiglitazone maleate.Middle.9hr	Rosiglitazone	M		9h	-0.308294	0.112114		-0.308788	-0.0712569	-0.130256	-0.0129135	-0.405128	-0.00312571	0.226254	0.0183858		1.45849	0.277967						0.0172176		-0.187865	0.192	-0.0508562	-0.132069				0.562669		-0.299851		0.15681					-0.1008	0.191657	0.0028257
TG-GATES	Rat	Liver	vivo	repeat	TG-RVivoLiverRepeat - amiodarone.High.4day	Amiodarone	H		4d	-0.0441891	0.112121		-0.218419	0.400979	-0.223357	0.164425	0.048848	0.0766495	-0.0943569	-0.151697		1.16947	-0.294205						-0.152879		0.210933	0.0531408	0.0816691	0.0478525				0.553779		-0.377555		1.82811					-0.0212738	-0.242394	-0.0565812
TG-GATES	Rat	Liver	vivo	repeat	TG-RVivoLiverRepeat - gemfibrozil.Low.8day	Gemfibrozil	L		8d	-0.0927215	0.112189		-0.151757	0.372134	0.420265	0.0464442	0.6677	0.435071	0.0364808	-0.0512436		2.38848	0.366833						0.0170813		-0.265422	-0.0335701	0.0622166	-0.175377				-1.15604		0.450904		3.03144					-0.247523	-0.285795	-0.133351
TG-GATES	Rat	Liver	vivo	repeat	TG-RVivoLiverRepeat - promethazine.Low.15day	Promethazine	L		15d	-0.00972275	0.112202		0.123002	0.320832	0.298346	0.0968407	0.546784	-0.0681557	0.17621	0.202901		-0.234842	0.331152						-0.124609		-0.0339984	-0.0102956	0.0897738	-0.110337				-0.10501		0.606894		0.920828					0.102147	-0.217254	0.00079873
TG-GATES	Human	Liver	vitro	bolus	TG-HVitro PHH - bromoethylamine.Low.24hr	Bromoethylamine	L		24h	0.0165896	0.112218	-0.112998	-0.0178155	0.0488483	-0.0535226	-0.0930275	0.0608224	0.0686443	-0.0358543	-0.00467038	0.0123728		-0.281808	0.170787	-0.10095	-0.0893493	0.00953961	0.000462947	0.0316914	0.0820732	-0.0132614	-0.0914959	0.00648259		0.0269563	-0.0563023	0.215249	0.0353816	0.0338237	0.101051	0.0252896	0.0515837	0.100861	-0.0154183	0.108413	0.00864223	0.0151415		-0.0361605
TG-GATES	Rat	Liver	vivo	bolus	TG-RVivoLiverSingle - monocrotaline.Middle.24hr	Monocrotaline	M		24h	-0.12598	0.112222		-0.225956	-0.131155	0.0447398	0.0643202	0.144159	-0.0788834	0.420779	-0.0955948		-0.0241958	0.278369						0.0819883		0.435406	-0.0469888	0.0267962	-0.0377383				0.635798		0.248748		-0.949512					0.0219289	-0.61065	-0.0338786
TG-GATES	Rat	Liver	vivo	repeat	TG-RVivoLiverRepeat - furosemide.High.4day	Furosemide	H		4d	0.351664	0.112243		-0.598078	0.0297177	0.025745	0.316088	-1.10669	0.146627	0.0192299	-0.333716		0.0516677	-0.0327736						0.0615297		-0.277086	-0.0626805	0.0552005	-0.0101195				-0.152079		-0.568626		0.916479					-0.0303291	-0.481049	-0.0685861
TG-GATES	Human	Liver	vitro	bolus	TG-HVitro PHH - buthionine sulfoximine.Low.24hr	Buthionine sulfoximine	L		24h	0.188931	0.112282	0.0160865	0.092519	-0.147452	0.0406611	0.0206927	0.0353759	0.174991	-0.0611277	0.0889952	0.105724		0.071682	-0.0477708	0.063989	0.0771979	-0.0357333	-0.106659	0.0305521	0.0145908	-0.0728215	0.0902362	0.108198		-0.100319	0.113977	0.191655	0.0250234	0.0065656	0.0375408	0.0151801	0.0423745	-0.18746	0.0893249	0.0884292	-0.0329832	0.00822065		0.0100544
TG-GATES	Rat	Liver	vivo	bolus	TG-RVivoLiverSingle - moxisylyte.Middle.9hr	Moxisylyte	M		9h	0.0995188	0.112313		-0.0621916	-0.0702738	0.17567	-0.0286153	0.0504305	-0.0325745	0.0625948	-0.145628		0.0482515	0.267675						-0.131041		0.243332	0.0029749	-0.0210532	-0.0827233				-0.987377		0.0333467		-0.00174679					-0.0402727	0.15126	0.0459193
TG-GATES	Rat	Liver	vivo	repeat	TG-RVivoLiverRepeat - furosemide.Middle.8day	Furosemide	M		8d	0.180262	0.112326		0.285032	-0.393653	-0.559817	0.0884293	-0.37429	0.0884286	-0.22852	-0.0923703		-0.160378	-0.458166						0.104558		-0.00999658	-0.0323558	-0.185229	-0.0550549				0.744996		-0.279785		-0.751068					-0.0752636	0.321204	-0.0522399
TG-GATES	Rat	Liver	vivo	repeat	TG-RVivoLiverRepeat - cisplatin.Low.15day	Cisplatin	L		15d	0.0211953	0.112392		0.10741	-0.112401	-0.120813	0.0875552	0.188884	0.0814201	0.0339353	-0.0560292		-0.233325	0.508352						0.051522		0.174102	0.106243	-0.0895498	0.0902321				-0.80855		0.000457824		-0.34498					0.169498	-0.108359	-0.00147044
TG-GATES	Rat	Liver	vivo	repeat	TG-RVivoLiverRepeat - coumarin.Low.29day	Coumarin	L		29d	0.127216	0.112463		0.71056	0.204312	-0.161321	-0.107673	0.0197754	0.0693221	0.0992623	0.143869		-0.11489	0.164068						-0.0893312		0.489384	0.0336845	-0.310686	0.0137599				-0.574817		-0.183534		1.48416					0.101135	-0.167266	-0.0608874
TG-GATES	Rat	Kidney	vivo	bolus	TG-RVivoKidneySingle - valproic acid.High.9hr	Valproic acid	H		9h	0.0346024	0.112465	0.0821659	0.0503354	0.221358	-0.134642	0.155994	0.12293	0.245684	-0.0259085	0.1639	-0.0390733	0.318334	-0.372488		-0.0767492			-0.224496	0.117412	0.124855	-0.0522317	0.193021	0.153849	-0.158695				0.340173		-0.0773321		0.0800396				-0.0447143	-0.477153	-0.204975	0.110367
TG-GATES	Rat	Liver	vivo	bolus	TG-RVivoLiverSingle - naproxen.Low.6hr	Naproxen	L		6h	0.194583	0.112484		0.354863	0.0763042	0.0747695	-0.0950953	-0.210313	-0.0724852	-0.12292	-0.00599399		0.0283686	-0.528797						0.0423081		-0.0673216	0.059359	0.0823323	-0.00243691				0.177266		-0.0737295		0.297966					-0.0217418	-0.0663408	0.0117891
TG-GATES	Rat	Liver	vivo	repeat	TG-RVivoLiverRepeat - doxorubicin.Middle.15day	Doxorubicin	M		15d	-0.119335	0.112534		0.171071	0.0437176	-0.56622	-0.149533	0.717485	0.0906594	-0.36444	0.0601736		-0.17499	-0.0214772						0.0379772		0.280395	0.0167733	-0.0822884	-0.018658				-0.474963		-0.258033		1.14544					0.126923	0.181378	0.00925283
TG-GATES	Rat	Liver	vitro	bolus	TG-Rvitro PRH - meloxicam.Low.2hr	Meloxicam	L		2h	-0.0373435	0.112589		0.0255991	0.249514	0.153644	-0.0160182	0.000504923	0.0652365	-0.0317619	0.0568552	0.0505112	0.0129167	0.0147248	-0.0254822	0.0978721			0.012314	0.058584	-0.0900506	0.0868855	0.0466371	0.0819205	0.069802				0.0815264		0.227291		0.114168				0.0456274	0.220015	-0.0239777	0.00881956
TG-GATES	Rat	Liver	vitro	bolus	TG-Rvitro PRH - caffeine.Low.8hr	Caffeine	L		8h	-0.101856	0.112793		0.167685	0.0310027	0.133668	-0.115725	-0.0896786	0.15508	-0.271346	0.119199	-0.074943	-0.0507228	0.190415	-0.00539165	0.125541			0.0194154	-0.126374	-0.00725959	0.284833	0.0716177	0.127172	-0.193011				0.151117		-0.117531		-0.024137				-0.0222505	-0.0204326	0.203531	0.056566
TG-GATES	Rat	Liver	vivo	bolus	TG-RVivoLiverSingle - vitamin A.Middle.24hr	Vitamin A	M		24h	-0.169532	0.112826		0.195646	-0.0102901	-0.104511	-0.0467065	-0.022691	0.00844759	0.146709	-0.131158		-0.117467	0.174653						-0.0173919		0.460314	-0.00240111	0.122604	0.0475638				-0.922837		-0.0888286		0.127854					0.132005	-0.132606	-0.0153123
TG-GATES	Rat	Liver	vitro	bolus	TG-Rvitro PRH - methapyrilene.Low.2hr	Methapyrilene	L		2h	-0.0533046	0.11288		-0.105913	0.230958	-0.188027	0.0581642	-0.0206769	-0.00099286	-0.00420291	0.0441686	0.0164151	-0.0267544	-0.343307	0.152134	0.0311233			-0.0294499	0.0324025	-0.0138438	0.159921	0.130175	0.122418	-0.0721928				-0.195463		-0.0606793		-0.19273				-0.0566428	0.106031	-0.0345538	-0.0060304
TG-GATES	Rat	Liver	vivo	repeat	TG-RVivoLiverRepeat - promethazine.High.8day	Promethazine	H		8d	-0.107319	0.113019		0.287635	2.47632	0.00984146	0.114582	-0.402619	0.354361	0.729325	-0.0239635		0.142163	-0.428677						-0.186485		0.814385	0.0168229	0.141638	-0.0517479				-1.03981		0.0546137		2.26724					0.0215458	0.125383	-0.101224
TG-GATES	Rat	Liver	vivo	bolus	TG-RVivoLiverSingle - gefitinib.Middle.6hr	Gefitinib	M		6h	-0.0671474	0.113315		-0.205529	-0.0643385	0.437349	0.01061	0.0903226	0.127159	-0.0291691	0.0326312		0.0795489	0.294704						-0.0737535		0.540996	0.0816079	-0.091971	0.152685				-0.621647		-0.0357329		0.189233					-0.27009	-0.52759	-0.000903093
TG-GATES	Rat	Kidney	vivo	bolus	TG-RVivoKidneySingle - phenacetin.Middle.3hr	Phenacetin	M		3h	0.05434	0.113324	0.327529	0.141813	-0.0166577	-0.237554	0.129943	0.0214439	0.090473	0.0887946	0.0314606	0.0150693	0.082251	0.107042		0.0968515			0.0792175	0.0878539	0.150174	-0.417898	-0.15885	-0.203265	0.0925687				0.450628		0.0325294		0.138764				-0.0686228	0.199178	-0.192604	0.340556
TG-GATES	Human	Liver	vitro	bolus	TG-HVitro PHH - carbon tetrachloride.High.24hr	Carbon tetrachloride	H		24h	0.00606198	0.113365	-0.0689629	0.235259	-0.00185231	0.0787121	0.134305	-0.130746	0.0758969	-0.0365102	-0.0552194	-0.0113806		-0.126876	-0.00851972	0.0294018	-0.0804202	0.121514	-0.0221256	0.108339	-0.109306	0.0619584	0.3668	0.0488796		-0.192143	-0.00160959	0.153923	0.0991747	-0.00486603	0.0368904	0.0422391	0.0411437	-0.111188	-0.00910514	-0.0265998	-0.0118656	0.0225736		-0.0430769
TG-GATES	Rat	Liver	vivo	bolus	TG-RVivoLiverSingle - tolbutamide.High.9hr	Tolbutamide	H		9h	0.078329	0.113448		0.209988	0.0599055	0.376104	0.00621746	0.290575	0.142391	-0.262231	0.0716553		-0.180584	0.0880501						-0.0396249		1.07971	0.0828545	0.237532	0.0143306				-0.723963		0.0867308		-0.284621					0.0497519	-0.410235	0.00723185
TG-GATES	Rat	Liver	vitro	bolus	TG-Rvitro PRH - methimazole.Low.8hr	Methimazole	L		8h	-0.0244272	0.113485		0.170769	0.250732	0.0723702	-0.0443294	-0.0796092	0.0406297	-0.0449808	0.00305591	0.150444	-0.112816	0.0374567	-0.0526856	0.146012			-0.0855019	-0.0461118	0.00817802	-0.170834	0.0438747	0.106163	-0.00914879				0.0488167		-0.0549678		-0.201073				-0.0380975	-0.0147357	-0.0101714	0.0138035
TG-GATES	Rat	Kidney	vivo	repeat	TG-RVivoKidneyRepeat - caffeine.Middle.15day	Caffeine	M		15d	-0.115632	0.11362	-0.207531	0.136243	0.205396	0.102294	-0.174045	-0.101324	0.0220485	0.100477	0.0241337	0.20004	0.0604011	0.299295		-0.111791			-0.0640622	-0.131108	0.0192504	0.100791	0.219993	-0.0836848	-0.106773				0.456014		0.291099		-0.00452704				-0.0402742	0.13011	0.15812	0.119565
TG-GATES	Human	Liver	vitro	bolus	TG-HVitro PHH - doxorubicin.Low.8hr	Doxorubicin	L		8h	-0.0627802	0.113637	0.0567236	-0.0336941	-0.0329696	-0.05888	-0.141157	-0.137681	-0.0186405	-0.231726	0.101392	0.0573012		0.0352366	-0.00397914	-0.106127	0.0335209	0.00818383	-0.0914545	-0.351166	0.010622	0.138188	-0.190704	0.00665781		-0.0796031	-0.0959409	0.136381	-0.0476456	-0.0353645	-0.00787969	-0.218066	-0.28233	0.0635908	-0.0698825	-0.0348943	0.185212	0.0304954		0.0305211
TG-GATES	Rat	Liver	vivo	bolus	TG-RVivoLiverSingle - 3-methylcholanthrene.Low.3hr	3-Methylcholanthrene	L		3h	0.143613	0.113681		0.490613	0.160264	1.58408	-0.16955	-0.0344356	0.0476038	0.0705525	0.0934943		-0.125393	-1.03265						-0.0601137		0.68494	0.250219	-0.128896	0.146336				-1.17163		-0.205085		0.351934					-0.0445841	-0.403061	0.0224795
TG-GATES	Human	Liver	vitro	bolus	TG-HVitro PHH - azathioprine.Low.24hr	Azathioprine	L		24h	-0.095673	0.113683	0.187087	-0.0335513	-0.18322	-0.17468	-0.0387606	-0.129191	0.70485	-0.403049	-0.329638	-0.0154328		-0.338903	0.244125	0.26922	0.286796	-0.105311	0.133976	0.102826	0.021236	0.0291976	0.226376	0.279545		-0.402633	-0.0737178	0.273637	0.282152	0.061255	0.22506	-0.481125	-0.123054	0.165329	0.0263429	0.000454003	-0.213809	0.115649		-0.140174
TG-GATES	Human	Liver	vitro	bolus	TG-HVitro PHH - WY-14643.Middle.2hr	WY-14643	M		2h	-0.0226078	0.113858	0.0600597	0.0736867	0.0297275	-0.0252721	-0.0317114	0.00446927	-0.0157295	0.0439253	-0.149795	-0.00558104		0.00223954	-0.0386754	0.0512201	0.0970815	-0.0367376	-0.142013	-0.133413	-0.0607955	0.0380841	0.241204	-0.0546694		0.0144362	0.110104	-0.00175516	0.01156	0.0387728	0.0753865	-0.159447	-0.0495885	0.315366	0.041159	0.0328155	0.0181979	0.0325713		0.0222534
TG-GATES	Human	Liver	vitro	bolus	TG-HVitro PHH - nifedipine.Middle.8hr	Nifedipine	M		8h	0.00180653	0.113903	0.0203965	0.39308	-0.0798196	-0.0732726	0.131713	-0.0304063	0.178736	-0.0639422	-0.0161088	-0.04509		-0.0976503	0.0544489	0.0836674	-0.0197516	-0.0344286	-0.039495	-0.0272371	0.166797	-0.23149	0.0926091	0.1161		-0.0666134	0.0347581	0.00791783	-0.0424633	-0.0442688	-0.021256	-0.0134797	-0.00428309	0.108421	-0.0399967	0.131787	0.12397	-0.0217375		-0.0230357
TG-GATES	Rat	Liver	vivo	repeat	TG-RVivoLiverRepeat - chlorpropamide.Low.4day	Chlorpropamide	L		4d	-0.0374298	0.113904		0.185259	0.0747644	-0.150223	0.110285	-0.518548	0.00641381	-0.0612787	-0.0591975		-0.184294	-0.356871						0.103365		0.17613	0.20417	0.250861	-0.0602408				0.516082		0.0765294		-0.394041					0.138741	-0.0874034	-0.0143779
TG-GATES	Human	Liver	vitro	bolus	TG-HVitro PHH - amiodarone.High.2hr	Amiodarone	H		2h	-0.00557941	0.11416	-0.0688469	0.0296511	-0.0402854	0.0698023	0.0757507	0.00936874	-0.00921995	-0.12536	0.0202786	-0.0058253		-0.040043	-0.108581	-0.00809842	0.0825854	-0.0158151	-0.0920032	-0.0181344	0.0140242	0.0525715	-0.0871978	-0.00984737		0.0309134	-0.0557988	0.0970109	0.0388246	-0.0146955	0.0435951	0.0485425	0.0434169	-0.139503	0.0761096	0.0145492	-0.0525803	0.0281266		0.0038451
TG-GATES	Rat	Liver	vitro	bolus	TG-Rvitro PRH - tamoxifen.Low.8hr	Tamoxifen	L		8h	-0.076306	0.114223		-0.0346056	0.0515947	-0.138414	-0.0163982	-0.114712	0.0580537	0.0837638	-0.0152068	-0.0141575	-0.0218153	0.0621415	0.0899133	-0.0212678			-0.0169271	-0.118112	-0.125901	-0.179891	0.0459938	-0.0528218	-0.0806556				-0.0268139		0.065553		-0.171304				0.0228189	0.107491	-0.0153986	-0.0173906
TG-GATES	Rat	Liver	vivo	bolus	TG-RVivoLiverSingle - clomipramine.High.24hr	Clomipramine	H		24h	0.232353	0.114308		-0.0889949	0.300682	0.344096	0.204369	0.202626	0.143735	-0.414029	-0.228445		-0.322125	-0.287734						0.0148086		0.304269	0.170572	0.177889	-0.0137717				-0.57378		0.019887		0.406201					-0.0378692	0.0332907	-0.0455532
TG-GATES	Rat	Liver	vivo	bolus	TG-RVivoLiverSingle - papaverine.Middle.6hr	Papaverine	M		6h	0.179754	0.114325		-0.0256962	0.0562452	0.0678527	0.0519822	0.422721	0.0634525	-0.114153	-0.0644689		0.320456	-0.0571278						-0.13794		-0.140384	0.0492286	-0.0574612	0.0711968				-1.20933		-0.182269		0.161096					0.00223171	-0.276668	0.00657963
TG-GATES	Human	Liver	vitro	bolus	TG-HVitro PHH - bendazac.High.24hr	Bendazac	H		24h	0.325565	0.114445	-0.145947	0.520526	0.0517196	0.0777955	-0.0834684	0.0880083	0.271414	0.197657	-0.0411665	0.124735		-0.161641	-0.062981	0.0165388	0.120096	0.0133118	0.0898972	0.0642166	0.704278	0.278055	-0.0339999	0.0924201		0.178517	0.31615	0.406356	0.0813338	0.017996	0.0703373	-0.0385493	0.162133	0.133428	0.0178894	0.117409	0.13225	-0.0946175		0.0170966
TG-GATES	Rat	Liver	vivo	bolus	TG-RVivoLiverSingle - cimetidine.Middle.24hr	Cimetidine	M		24h	0.00941362	0.114588		0.28984	-0.197305	-0.278611	-0.0264334	0.101824	0.116533	-0.276939	-0.074528		-0.233959	-0.27422						-0.0312184		-0.428805	0.105075	-0.163677	-0.17098				0.408078		-0.0641002		-0.257071					-0.145616	0.139923	-0.0485054
TG-GATES	Rat	Liver	vivo	repeat	TG-RVivoLiverRepeat - chloramphenicol.High.29day	Chloramphenicol	H		29d	-0.165686	0.114589		0.0695102	1.07684	0.43603	0.0964887	-0.179202	0.239837	-0.491254	-0.246986		1.36432	-0.11629						0.0123424		0.168646	0.0688113	-0.196197	-0.0296642				-0.0170424		-0.00894628		4.15178					0.145155	0.0384162	-0.0719396
TG-GATES	Human	Liver	vitro	bolus	TG-HVitro PHH - chloramphenicol.High.24hr	Chloramphenicol	H		24h	-0.134979	0.114737	0.0625362	0.496086	-0.0179277	0.056624	0.0354741	-0.570916	0.22254	0.0897473	0.0840472	0.183933		-0.106098	-0.0241312	0.00823935	-0.151506	0.0325341	0.179913	0.0357318	-0.187123	0.19976	-0.0220309	-0.0334242		0.0505146	0.0606107	0.0178156	0.140579	0.0690472	0.0929921	-0.0562046	-0.0772704	0.176762	-0.0446329	-0.00526229	0.0722849	-0.145922		-0.099933
TG-GATES	Human	Liver	vitro	bolus	TG-HVitro PHH - amiodarone.High.8hr	Amiodarone	H		8h	0.0143706	0.114854	0.0624495	0.0225532	0.0747434	-0.118875	0.145036	0.0658582	0.127398	0.0405825	-0.000659563	-0.140659		0.163562	-0.0252424	-0.116712	0.0458953	-0.0798595	-0.123782	0.00931923	-0.0668721	-0.119129	-0.0685435	0.0663028		-0.018587	-0.0413415	0.0533356	0.0686043	0.0779275	0.0442256	0.084268	0.0677384	-0.0910979	-0.00723572	0.0610437	0.0490417	0.0936185		0.0172304
TG-GATES	Rat	Liver	vitro	bolus	TG-Rvitro PRH - chlormadinone.Middle.24hr	Chlormadinone	M		24h	0.039334	0.114868		0.778653	-0.0821019	-0.296932	0.032508	-0.137589	0.0569452	0.160416	0.0600052	-0.132925	0.199645	-0.0399622	-0.160974	0.0520495			-0.148745	-0.148365	0.175713	0.180106	0.0991216	0.145844	-0.136681				0.0614241		0.39412		0.211554				-0.0501365	-0.102747	-0.166856	-0.0247037
TG-GATES	Rat	Liver	vivo	bolus	TG-RVivoLiverSingle - etoposide.Low.24hr	Etoposide	L		24h	-0.0344009	0.114893		-0.0721491	-0.0801301	0.0889183	0.171153	0.210484	0.0728098	-0.0789646	0.0885371		-0.058433	-0.781747						0.00946572		0.106875	0.295541	-0.264365	-0.18592				0.895784		0.0493529		0.0236829					0.174994	-0.1274	0.01217
TG-GATES	Human	Liver	vitro	bolus	TG-HVitro PHH - carbon tetrachloride.Middle.24hr	Carbon tetrachloride	M		24h	0.068273	0.115461	-0.0332788	0.14919	0.010583	0.094354	0.0105067	-0.0616227	-0.00447105	0.0666954	-0.0426425	-0.149708		0.0774524	-0.128534	0.0138283	-0.111074	0.064782	0.0810455	0.00841684	-0.103098	-0.247812	0.292451	0.00146024		-0.0998078	0.0622278	0.0653944	0.00207108	-0.00597033	0.0512743	0.0511091	0.0933692	-0.0121001	-0.140733	-0.0831963	-0.0472742	-0.0296738		-0.0865392
TG-GATES	Rat	Liver	vivo	repeat	TG-RVivoLiverRepeat - propranolol.High.29day	Propranolol	H		29d	0.163777	0.115561		0.0278215	1.16865	0.353855	-0.0805739	-0.0889858	0.161188	-0.307679	0.0340731		0.46691	0.493514						-0.149692		0.353448	0.00649152	-0.0407494	-0.0883124				0.351129		-0.4363		2.74513					-0.0347567	-0.142542	-0.0205485
TG-GATES	Rat	Liver	vitro	bolus	TG-Rvitro PRH - aspirin.Low.2hr	Aspirin	L		2h	0.0241609	0.115584		0.0156955	0.0429275	-0.111898	0.0341115	-0.0627067	-0.024346	0.15344	0.0036249	0.127152	0.12695	0.0113581	-0.139559	0.00165557			-0.0433998	-0.012132	0.110043	0.0306306	-0.000405077	-0.0340628	0.0937138				-0.0411222		0.0964222		0.145004				0.0339447	0.0782372	0.0478003	0.0177157
TG-GATES	Rat	Liver	vivo	bolus	TG-RVivoLiverSingle - nitrofurantoin.Middle.9hr	Nitrofurantoin	M		9h	-0.0793938	0.11563		-0.520018	0.258796	-0.0584434	0.129267	-0.11371	0.109999	-0.631551	0.0163474		0.0766593	0.622928						0.0279605		0.581065	0.00407055	0.0808463	-0.0626175				0.626762		-0.609409		0.336454					0.0816832	0.117769	-0.0235154
TG-GATES	Rat	Liver	vivo	bolus	TG-RVivoLiverSingle - moxisylyte.High.24hr	Moxisylyte	H		24h	-0.394194	0.11566		-0.448694	0.109568	-0.0395407	0.0976987	0.224274	-0.0552945	-0.132463	0.0160165		0.212867	-0.163052						-0.0914366		0.628251	0.10383	0.125434	-0.250446				0.478505		-0.0861935		0.371045					0.107796	-0.252044	0.0209909
TG-GATES	Rat	Liver	vitro	bolus	TG-Rvitro PRH - tannic acid.Middle.2hr	Tannic acid	M		2h	0.0225294	0.115667		-0.143793	0.0542408	0.0181413	0.0600121	-0.136026	-0.00350659	-0.0242532	-0.116367	0.0202535	0.0193999	-0.0436921	0.0394447	0.179559			0.0408702	-0.062201	-0.0607372	-0.0776773	0.100093	0.00135884	0.129831				-0.0536469		-0.220843		-0.0864444				-0.0626362	0.00644411	-0.00340891	-0.0216609
TG-GATES	Human	Liver	vitro	bolus	TG-HVitro PHH - ethionine.Low.8hr	Ethionine	L		8h	-0.0908238	0.115725	-0.0899065	0.129942	-0.0828659	0.119637	0.0150504	-0.120373	-0.0398454	-0.0250873	0.0202831	0.0369333		-0.144564	-0.130629	-0.223546	-0.0377555	0.318029	0.155379	-0.078567	0.00927365	0.325131	-0.120858	-0.111891		0.0317003	-0.0267145	0.225157	0.0382883	0.0868976	0.0769548	-0.0336413	0.0476846	0.0182856	0.0742806	-0.12989	-0.00824737	-0.129299		-0.01728
TG-GATES	Rat	Liver	vitro	bolus	TG-Rvitro PRH - famotidine.Middle.2hr	Famotidine	M		2h	-0.0108099	0.115757		0.00744191	0.0709319	-0.0927158	-0.000645127	-0.0806982	-0.0319886	-0.0400899	-0.115088	-0.0143109	0.131332	0.0161161	0.115641	0.272915			0.052888	0.0656374	-0.0766206	0.125142	0.10483	0.247487	0.190814				-0.031026		-0.0128913		0.0203634				0.00568329	0.0234925	0.0116023	-0.00535882
TG-GATES	Human	Liver	vitro	bolus	TG-HVitro PHH - phalloidin.High.8hr	Phalloidin	H		8h	0.334738	0.115799	-0.0175339	0.0777047	0.236041	-0.0491753	-0.137258	0.096744	0.166274	-0.128848	0.0527908	0.025815		-0.0649598	-0.0196829	-0.0281083	-0.129379	-0.387096	-0.300357	0.107932	0.034626	0.257711	-0.0198212	0.0257701		0.366685	0.628792	-0.703326	-0.136657	0.00757793	0.193116	-0.405259	-0.853255	0.0652862	-0.093968	-0.280098	-0.212054	-0.0753864		0.0873173
TG-GATES	Rat	Liver	vitro	bolus	TG-Rvitro PRH - amitriptyline.Middle.2hr	Amitriptyline	M		2h	0.0550095	0.115821		0.103866	-0.0391702	-0.228558	0.0218936	-0.142675	-0.0709977	0.363451	0.0123967	0.0892686	0.0811034	0.205508	0.105637	0.0176985			0.10539	-0.200286	-0.0116976	-0.201652	0.271006	-0.306405	0.0653828				0.171471		0.126247		-0.172102				0.0115983	0.312305	0.109847	-0.029309
TG-GATES	Rat	Liver	vivo	repeat	TG-RVivoLiverRepeat - butylated hydroxyanisole.Middle.8day	Butylated hydroxyanisole	M		8d	-0.154268	0.115844		-0.326697	3.52848	0.3128	-0.0313618	-0.627071	0.0386904	0.0476702	0.134648		-0.267007	0.131768						0.139224		-0.0546045	0.0349682	0.218425	-0.18641				-0.364606		0.00204927		2.61202					-0.060765	-0.504362	-0.00354761
PREDICT-IV	Human	Kidney	vitro	repeat	HVitroPIV RPTEC - ADEFVR-HYPO_HD14_LFC	Adefovir dipivoxil - hypoxia	H		14d	0.0598505	0.116169	0.205971	0.272823	0.169552	-0.00478617	-0.203746	0.0898239	0.162387	-0.851736	-0.0697469	0.015674	0.0251769	0.156938	-0.140324	-0.0584791	0.438275	-0.0977839	0.305284	-0.0868401	0.0444155	0.120562	-0.015035	0.107621	-0.0941552	-0.0688445	0.159791	1.07945	-0.190927	0.0604894	0.40347	-0.121681	0.533871	0.644648	-0.00586672	-0.0469101	-0.234231	0.570059	-0.0292919	-0.100525
TG-GATES	Rat	Liver	vivo	repeat	TG-RVivoLiverRepeat - sulfasalazine.Middle.8day	Sulfasalazine	M		8d	-0.0192684	0.116625		-0.17692	0.116433	-0.0126797	-0.0062331	-0.882962	0.0305909	0.105058	-0.206327		-0.00137333	0.946502						0.131171		0.306475	-0.0376364	0.0730282	-0.0270105				0.353847		0.0749829		1.28238					0.0712997	0.167155	-0.0310614
TG-GATES	Human	Liver	vitro	bolus	TG-HVitro PHH - clofibrate.Low.24hr	Clofibrate	L		24h	0.0877977	0.116627	-0.122909	-0.000114619	0.0193024	-0.188931	-0.150482	0.0324599	-0.113165	0.0106636	0.090464	-0.126045		0.0984612	0.0105154	-0.0253569	0.0070653	-0.0819018	0.0400819	0.171014	0.012307	-0.178993	-0.191075	0.0527926		-0.0617965	0.0800607	-0.0718055	-0.0999378	0.00546011	-0.0799867	0.0645769	-0.078924	-0.0582309	-0.0211708	0.0433483	-0.0554563	-0.0204081		0.0468102
TG-GATES	Human	Liver	vitro	bolus	TG-HVitro PHH - ethionamide.Middle.8hr	Ethionamide	M		8h	-0.0279213	0.116802	0.00421329	-0.0258841	0.0504292	-0.0505011	-0.139728	-0.0801213	-0.0226094	0.145491	0.0872293	-0.0159471		0.00850958	0.143355	0.0164945	-0.0649778	0.057004	-0.122941	0.0394895	-0.108211	-0.0376312	0.240424	0.00868716		0.075908	0.0995995	-0.132586	0.0365945	0.0868301	0.0433474	-0.00271564	0.0557209	0.0845559	0.105525	0.0073954	0.0195928	0.0675317		0.0163298
TG-GATES	Rat	Liver	vivo	bolus	TG-RVivoLiverSingle - monocrotaline.Low.6hr	Monocrotaline	L		6h	-0.0305604	0.116811		-0.0759147	-0.201113	0.145454	0.0521207	0.381693	0.141419	0.203544	-0.0447571		0.0540077	0.52162						-0.0216668		0.271675	0.00453711	0.0334001	0.130688				-0.290924		0.42532		-0.65286					0.0239909	0.473561	0.0602723
TG-GATES	Rat	Liver	vivo	repeat	TG-RVivoLiverRepeat - clofibrate.High.4day	Clofibrate	H		4d	-0.141418	0.116883		-0.407467	0.181669	0.0915623	-0.0499214	0.0268533	0.558474	0.0829976	-0.239609		2.4386	-0.416002						-0.000785566		0.324924	-0.0137761	0.0666104	-0.344753				-0.404564		0.186434		2.44006					0.0707444	-0.502256	-0.183787
TG-GATES	Rat	Liver	vitro	bolus	TG-Rvitro PRH - cyclophosphamide.High.8hr	Cyclophosphamide	H		8h	0.0674151	0.116895		-7.60771e-06	0.124321	0.0284138	0.138421	-0.14642	-0.0516514	0.196077	-0.0376367	0.0807108	0.12797	0.00335278	0.0316253	-0.0746153			-0.179786	-0.206925	0.103202	0.165799	-0.0488187	0.0820227	-0.132182				-0.0421144		-0.0231521		-0.0487029				-0.0583333	0.237238	-0.132469	-0.0168428
TG-GATES	Rat	Liver	vivo	bolus	TG-RVivoLiverSingle - fluphenazine.Low.9hr	Fluphenazine	L		9h	-0.196663	0.117077		-0.426284	-0.374926	-0.00471109	0.00887691	0.253794	0.0148777	0.179075	-0.0321458		0.111816	0.0193882						0.13461		0.0911529	-0.0550216	-0.0976468	-0.0626443				-0.256439		-0.294127		-0.256062					0.0910449	-0.228038	0.0148955
TG-GATES	Rat	Liver	vitro	bolus	TG-Rvitro PRH - nimesulide.High.8hr	Nimesulide	H		8h	0.258349	0.117107		0.273552	-0.444998	-0.422403	-0.0676722	0.069973	0.0525139	-0.0915208	0.0438096	0.464103	0.458983	-0.0458803	0.0768591	0.192359			0.255344	0.168707	0.727056	-0.210864	-0.0371506	-0.292302	0.0075168				-0.624695		-0.082767		-0.401193				-0.0239039	0.140269	-0.316375	0.0384686
TG-GATES	Rat	Liver	vivo	repeat	TG-RVivoLiverRepeat - chlorpromazine.Low.15day	Chlorpromazine	L		15d	0.0725916	0.11712		0.0195599	0.0723832	-0.324143	-0.0737301	-0.591775	0.0136633	-0.189783	-0.0510524		-0.242429	-0.774934						-0.102127		0.045375	-0.0343515	0.236981	0.0428262				0.548167		0.0178571		0.922788					0.0286657	0.319835	-0.0363132
TG-GATES	Rat	Liver	vivo	repeat	TG-RVivoLiverRepeat - labetalol.Middle.29day	Labetalol	M		29d	0.00349884	0.117194		-0.0198652	0.138015	-0.27975	0.0981651	-0.309866	0.028474	-0.205892	0.0840558		0.0593692	-0.374036						0.00980447		-0.049952	0.0265211	0.223538	-0.0349788				0.830609		-0.464708		1.47809					-0.0568755	-0.223872	-0.0219097
TG-GATES	Rat	Liver	vivo	bolus	TG-RVivoLiverSingle - hexachlorobenzene.Low.6hr	Hexachlorobenzene	L		6h	0.127723	0.117227		0.223305	0.294347	-0.171732	-0.0838064	-0.0582688	-0.0444341	-0.448052	0.365142		0.105243	-0.00146515						-0.0240103		0.352375	-0.000397638	0.233244	0.0225419				0.634572		-0.037886		0.58938					0.136911	-0.000263534	0.0151333
TG-GATES	Rat	Liver	vivo	bolus	TG-RVivoLiverSingle - disulfiram.High.6hr	Disulfiram	H		6h	-0.145058	0.117302		-0.111187	0.118869	-0.479024	-0.0298921	0.233869	-0.00208497	-0.114228	-0.080986		0.041637	-0.657147						-0.151366		0.70799	0.07405	-0.43271	-0.148492				-0.405782		-0.00968064		-0.428076					-0.0411511	-0.167409	-0.0077845
TG-GATES	Rat	Liver	vivo	repeat	TG-RVivoLiverRepeat - coumarin.Middle.8day	Coumarin	M		8d	-0.216042	0.117311		0.09885	1.75818	0.0465628	-0.0407503	0.827824	-0.0114058	0.187426	0.532889		0.20036	0.175705						-0.0575116		-0.17271	0.0675101	-0.0753914	-0.0548309				-0.454954		-0.657098		1.53998					0.0655043	0.0116931	-0.0742908
PREDICT-IV	Rat	Liver	vitro	repeat	PIV Rvitro Repeat PRH - TOGIZN_LD14_LFC	Troglitazone	L		14d	-0.165251	0.117576	0.0109785	0.132787	-0.0617036	-0.00269779	-0.113823	0.00725239	-0.0483099	0.104186		0.0202226	0.819362	0.178254	-0.0175434	-0.0663193	-0.0818817	-0.0244517	0.0353107	-0.0837221	-0.0351767	-0.0999214	0.0676767	0.0995907	-0.204129	-0.109036	0.0915641	0.0558205	-0.0268988		-0.00239258	0.0540179	-0.061671	-0.101092		0.0779859	0.160001	0.036834	0.0165994	0.0249671
TG-GATES	Rat	Liver	vivo	bolus	TG-RVivoLiverSingle - ciprofloxacin.High.3hr	Ciprofloxacin	H		3h	-0.074429	0.117579		-0.393213	-0.201454	-0.0613645	-0.0682357	0.493712	0.077857	0.0745617	0.105296		0.057979	-0.154678						-0.0906461		-0.0732278	-0.0165033	-0.31305	0.0847456				0.902329		0.235392		0.292257					-0.0183173	-0.147891	-0.00871312
TG-GATES	Rat	Liver	vivo	repeat	TG-RVivoLiverRepeat - lomustine.Middle.4day	Lomustine	M		4d	-0.0630529	0.117817		0.306997	0.0719727	0.00139634	-0.171979	-0.202774	0.0928113	0.251991	0.069075		0.109975	0.132053						-0.0232914		0.14946	-0.0252967	-0.0247018	-0.0556815				-0.427387		0.277104		0.429904					0.0541803	-0.0576555	0.0227669
TG-GATES	Rat	Liver	vivo	repeat	TG-RVivoLiverRepeat - ticlopidine.Low.29day	Ticlopidine	L		29d	0.176843	0.117879		-0.050971	-0.0564806	-0.0146255	0.087092	-0.0664063	0.0808296	-0.0676769	-0.0943527		0.100594	-0.319205						0.0777984		0.333861	0.177329	0.150138	0.100168				0.80256		-0.248766		0.786087					0.0891339	0.150124	-0.0396401
TG-GATES	Rat	Kidney	vivo	repeat	TG-RVivoKidneyRepeat - acetazolamide.Low.8day	Acetazolamide	L		8d	-0.0309557	0.117956	-0.0679303	0.174676	0.0340529	0.0183123	0.0145771	-0.101052	-0.0409119	0.0936865	-0.0478125	0.199698	-0.0265052	-0.0592683		-0.254341			0.0371278	-0.15711	0.0129175	0.0129276	-0.0073649	-0.00426295	0.0117452				-0.665833		0.0461613		-0.028086				0.0420522	0.0290638	0.0695576	-0.147195
TG-GATES	Rat	Liver	vitro	bolus	TG-Rvitro PRH - gentamicin.Low.2hr	Gentamicin	L		2h	-0.0360919	0.118027		0.0481962	0.0461121	0.0354186	0.000714114	0.0505631	-0.00356844	-0.039567	-0.0475924	-0.00414409	-0.146211	-0.00885596	0.0230964	0.113477			0.001244	-0.0518948	-0.0503675	0.0203579	-0.0218657	-0.111731	-0.0157858				0.0262308		-0.0723533		0.0872853				-0.109966	0.0246043	0.0730722	-0.000180526
TG-GATES	Rat	Liver	vivo	repeat	TG-RVivoLiverRepeat - iproniazid.High.29day	Iproniazid	H		29d	0.0326158	0.11804		-0.178333	0.491206	-0.255778	0.182363	0.141976	0.116103	0.0105401	0.102944		-0.0559949	-0.124011						0.0510104		0.572353	0.040942	0.0818129	-0.112731				-0.199287		-0.169091		3.00496					0.0509737	-0.395914	-0.00266546
TG-GATES	Rat	Liver	vivo	repeat	TG-RVivoLiverRepeat - griseofulvin.Low.4day	Griseofulvin	L		4d	0.0253919	0.118149		-0.0827573	0.449828	-0.0206941	0.0520314	-0.226685	-0.0356857	0.214911	-0.0267126		-0.0163319	-0.016216						-0.0507302		-0.00238467	0.0198366	0.00601704	0.119127				-0.0673708		-0.152677		0.393678					-0.0531565	-0.0993682	0.00529185
TG-GATES	Rat	Liver	vitro	bolus	TG-Rvitro PRH - cyclosporine A.Middle.24hr	Cyclosporine A	M		24h	0.312127	0.118353		-0.273646	-0.168692	-0.0327281	0.0166879	0.17616	0.109666	0.219181	0.166864	0.0613192	0.232673	0.00963608	-0.1042	-0.0313185			-0.097237	-0.182332	0.314921	0.297045	-0.0257784	0.0456276	0.108298				0.215474		0.550405		-0.865306				-0.0589163	-0.0352399	0.118812	0.0115359
TG-GATES	Rat	Liver	vivo	bolus	TG-RVivoLiverSingle - flutamide.Low.3hr	Flutamide	L		3h	0.122891	0.118822		0.32583	-0.0481946	-0.316482	-0.168344	0.13065	-0.0164954	-0.301018	0.10181		0.106418	0.11145						-0.0893216		0.185452	0.029455	0.269227	0.00141017				-0.28341		-0.029439		-0.255946					0.108879	0.254178	0.0163395
TG-GATES	Rat	Liver	vivo	bolus	TG-RVivoLiverSingle - carboplatin.High.3hr	Carboplatin	H		3h	-0.0243735	0.11883		-0.0106269	0.0714859	-0.0573176	0.144084	-0.34154	0.0527865	0.264436	-0.127202		0.0164042	0.433893						-0.229503		1.79504	-0.143798	0.0122087	-0.0117522				0.157222		-0.0993648		-0.605336					-0.0289738	-0.0409511	0.0107963
TG-GATES	Rat	Liver	vivo	bolus	TG-RVivoLiverSingle - quinidine.Low.24hr	Quinidine	L		24h	-0.0271722	0.118938		-0.322265	0.225828	0.118172	0.116671	0.256951	0.0532347	0.258897	0.0957641		-0.121787	-0.18085						-0.0296012		0.0303284	0.0850508	-0.0499062	-0.0704251				-0.127112		-0.0538334		0.803597					-0.0344657	-0.208751	-0.0234895
TG-GATES	Rat	Liver	vivo	repeat	TG-RVivoLiverRepeat - mexiletine.Low.8day	Mexiletine	L		8d	0.0722801	0.119084		-0.295947	0.183172	0.040392	0.0979974	0.215366	0.0448693	-0.473442	-0.00571559		0.183703	0.14067						0.000567847		0.449961	-0.0129956	0.182075	-0.144365				0.581455		-0.0328181		0.48749					0.116834	0.409543	-0.0686922
TG-GATES	Rat	Liver	vivo	bolus	TG-RVivoLiverSingle - phenobarbital.High.6hr	Phenobarbital	H		6h	-0.321647	0.119191		0.145445	0.698327	-0.253017	-0.00791404	-0.494595	0.275238	-0.5609	-0.0542977		-0.166651	-0.628123						-0.168097		0.615302	-0.0208359	-0.236694	0.13178				-0.607732		0.0224202		1.13264					0.0714756	0.237689	0.00869608
TG-GATES	Rat	Liver	vivo	repeat	TG-RVivoLiverRepeat - fluphenazine.Low.29day	Fluphenazine	L		29d	0.0677081	0.119317		0.260238	0.190265	-0.0113945	0.0650006	-0.435377	0.0819849	-0.0755152	0.000421885		-0.000439085	-0.200267						-0.115768		0.0507469	0.0623864	0.102721	0.0268809				-0.74319		0.273881		1.34007					0.0896082	-0.132438	-0.0231278
TG-GATES	Human	Liver	vitro	bolus	TG-HVitro PHH - benzbromarone.High.8hr	Benzbromarone	H		8h	0.106922	0.119431	0.302991	-0.133991	-0.117755	-0.457873	-0.238702	-0.0818507	0.27915	-0.441081	-0.352102	0.0340233		-0.167858	0.41368	0.0619982	0.325878	-0.492466	0.18521	0.0601974	-0.208137	0.881475	-0.0412852	0.125079		0.0210859	0.27034	-0.966792	-0.0809593	-0.180246	-0.225554	-0.256896	-0.480099	0.0561741	0.0939029	-0.0132364	-0.587528	0.344054		0.162166
TG-GATES	Rat	Liver	vivo	repeat	TG-RVivoLiverRepeat - acetazolamide.Middle.4day	Acetazolamide	M		4d	0.152395	0.119447		-0.280461	0.211347	-0.163799	0.1008	0.222797	0.041893	-0.265066	-0.069872		0.176648	-0.138511						-0.071247		0.348142	0.0172951	-0.0289032	-0.0161712				0.128376		-0.259336		0.655656					-0.0263434	-0.261868	-0.0128932
TG-GATES	Rat	Liver	vivo	repeat	TG-RVivoLiverRepeat - tolbutamide.Middle.4day	Tolbutamide	M		4d	-0.00246517	0.119463		-0.243323	0.880363	-0.432866	0.00262603	0.0941876	0.0645603	-0.101844	-0.227974		0.219838	0.248461						-0.0107134		-0.424711	-0.0936339	0.0343513	-0.073305				0.56015		-0.0360989		1.03953					-0.0906762	0.3616	-0.00110461
TG-GATES	Human	Liver	vitro	bolus	TG-HVitro PHH - WY-14643.Low.8hr	WY-14643	L		8h	0.0631534	0.119519	0.0485403	0.0181356	0.0907412	-0.0364953	-0.0425721	0.0391071	0.0733344	0.104623	-0.0112915	-0.169662		0.0880547	0.053286	-0.00556599	-0.0905909	-0.0643721	0.0348548	0.0131211	0.0343886	-0.0581486	0.0163997	-0.00904225		0.0139724	-0.173537	-0.0349216	-0.0507464	-0.0138295	0.00791509	0.0616218	0.0366167	0.0171125	-0.0517079	0.0643657	0.0261204	0.0993167		-0.0203925
TG-GATES	Rat	Liver	vivo	repeat	TG-RVivoLiverRepeat - phenobarbital.Middle.15day	Phenobarbital	M		15d	-0.0675459	0.119854		0.262694	1.26373	0.169148	-0.266472	-0.349063	0.127602	-0.415813	0.0546448		-0.108539	0.117739						-0.0480669		0.597039	-0.0725488	-0.204826	-0.09018				-0.138767		-0.0379024		3.18943					0.0451363	-0.0303126	0.00246304
TG-GATES	Human	Liver	vitro	bolus	TG-HVitro PHH - azathioprine.Middle.8hr	Azathioprine	M		8h	0.199022	0.119958	-0.299957	0.207337	-0.0676097	-0.315997	0.163882	-0.0151479	0.168005	-0.214754	-0.00657684	-0.0669968		-0.0450791	-0.3369	-0.234803	-0.111333	-0.031139	-0.0353499	0.11864	0.219956	0.414321	-0.162865	0.13969		-0.197221	0.127626	0.35403	-0.0598269	0.0191417	0.0109384	-0.10993	-0.322245	-0.173339	-0.00437833	0.040612	0.0155359	0.340918		0.0312694
TG-GATES	Rat	Liver	vitro	bolus	TG-Rvitro PRH - vitamin A.Middle.24hr	Vitamin A	M		24h	-0.0596553	0.119964		0.103238	0.0921806	0.0582464	-0.076454	-0.0192623	0.0823598	-0.0153438	0.0451147	-0.069435	-0.0889058	0.048017	0.127984	-0.0743749			0.0650968	0.0136035	-0.116092	-0.122618	-0.0189991	0.0408608	-0.134614				0.0212563		-0.676498		0.285179				-0.00493606	0.00389276	0.0488606	0.0158374
TG-GATES	Human	Liver	vitro	bolus	TG-HVitro PHH - etoposide.Middle.24hr	Etoposide	M		24h	-0.0679276	0.120038	0.0930082	0.271652	0.163948	0.128987	-0.076332	0.0993918	0.0425481	-0.18844	0.00269576	0.20504		0.0974338	-0.0188276	0.0390456	0.0828402	0.00685803	0.0498031	0.0442164	0.0149775	0.0414	0.0126675	0.0981284		-0.103796	0.0105931	0.0937058	0.0372127	0.0147196	0.127872	-0.154961	-0.14878	0.139458	-0.0480801	-0.0140928	0.0806157	0.111143		0.0525426
TG-GATES	Rat	Kidney	vivo	bolus	TG-RVivoKidneySingle - bucetin.Middle.9hr	Bucetin	M		9h	0.00767733	0.120048	-0.122202	-0.0527693	0.0266874	0.271348	-0.0910192	0.0991141	-0.00428491	-0.24657	0.111566	-0.308264	0.26321	0.323164		0.0146641			0.121256	0.0963693	0.144981	-0.136414	-0.0488688	-0.0877794	0.0712144				-0.109339		-0.134912		0.0662716				-0.0204925	-0.0798139	-0.0402222	-0.104431
TG-GATES	Rat	Liver	vivo	bolus	TG-RVivoLiverSingle - nitrofurazone.Low.9hr	Nitrofurazone	L		9h	-0.179281	0.120091		0.234979	0.802377	0.51879	-0.0457982	0.248213	0.14427	0.0481396	-0.00863107		0.273553	0.0435354						0.0472547		-0.327831	0.059692	0.0965166	-0.0923989				0.253336		0.318565		0.454056					0.0226454	-0.092948	-0.0324772
TG-GATES	Rat	Liver	vivo	bolus	TG-RVivoLiverSingle - tannic acid.Low.3hr	Tannic acid	L		3h	0.155564	0.120483		0.0782615	-0.121616	-0.136581	0.0181335	-0.150399	0.172043	0.297832	-0.0536978		0.236818	-0.136128						-0.00519014		0.188666	-0.0398195	-0.230985	0.0176176				0.255623		-0.316825		0.0669342					-0.0542812	0.103395	-0.00392781
TG-GATES	Human	Liver	vitro	bolus	TG-HVitro PHH - ethinylestradiol.Middle.24hr	Ethinylestradiol	M		24h	0.0803479	0.120501	0.0221754	0.123433	0.227334	-0.015456	-0.0521965	-0.0894624	0.05399	0.0999226	-0.128857	0.0450087		-0.0973821	0.0171901	0.100841	-0.0706268	-0.0833378	0.0518498	-0.00280914	-0.0381641	-0.0640334	0.157422	0.0147778		0.143674	0.253921	-0.0477497	-0.0235024	0.0177616	0.0962399	0.0517656	-0.00574753	0.00198926	0.103557	0.075682	0.0341272	0.0727911		0.00939723
TG-GATES	Human	Liver	vitro	bolus	TG-HVitro PHH - flutamide.Middle.24hr	Flutamide	M		24h	-0.0435222	0.120509	-0.040794	0.121672	-0.0469681	0.0560615	0.124911	-0.0504268	0.0645845	0.0552971	0.00709303	-0.04642		-0.150271	-0.106649	-0.0443732	-0.10137	0.130711	-0.104004	0.105899	0.00665374	-0.106521	-0.401922	-0.0176187		0.0368059	-0.138098	0.0335006	0.0298753	-0.00169389	0.0158107	-0.105844	-0.011633	0.0178114	-0.0160328	0.103966	0.23859	-0.0380775		-0.0803744
TG-GATES	Human	Liver	vitro	bolus	TG-HVitro PHH - allyl alcohol.Low.24hr	Allyl alcohol	L		24h	-0.00670125	0.12054	0.0242104	0.00305003	-0.0481903	0.121928	-0.123744	0.0252976	0.0662289	0.0254076	0.00823569	0.10217		-0.111263	0.0282194	-0.0160347	0.010752	0.0551076	-0.0798587	-0.0228191	0.0441574	0.145031	-0.147945	0.044035		0.131826	0.0380755	0.00977451	0.00723776	0.0745048	0.0489746	0.0838942	0.108638	0.123235	0.0486713	-0.0174735	-0.0798731	-0.045156		-0.118582
TG-GATES	Rat	Liver	vivo	bolus	TG-RVivoLiverSingle - pemoline.Low.24hr	Pemoline	L		24h	-0.0362401	0.120541		0.210889	0.279707	0.0494775	-0.119587	-0.398936	-0.0775177	0.169636	-0.241038		0.338252	-0.495828						0.118034		0.392986	-0.0513499	-0.0516439	0.00105639				0.760907		-0.509793		0.148821					0.0174647	0.0072674	-0.0048001
TG-GATES	Rat	Liver	vivo	repeat	TG-RVivoLiverRepeat - omeprazole.Low.15day	Omeprazole	L		15d	-0.162969	0.120639		-0.0292471	0.217231	-0.236194	0.0967815	-0.298708	0.0462464	0.0562804	0.115758		-0.0999199	-0.533973						0.0705257		0.216623	0.0527544	0.0575715	-0.0275933				0.202038		0.0864977		1.13624					0.109305	-0.18321	0.00255247
TG-GATES	Rat	Kidney	vivo	repeat	TG-RVivoKidneyRepeat - captopril.Middle.15day	Captopril	M		15d	-0.109034	0.120654	0.0125256	0.00359553	-0.0477839	-0.293414	0.0929656	0.0280851	0.0206169	-0.0280117	-0.0444083	-0.171504	-0.0960155	0.201538		-0.291665			-6.69289e-05	-0.0566204	0.0246881	-0.140254	-0.117705	-0.0798096	-0.201407				0.491186		-0.114483		0.0813249				-0.0799021	-0.15781	0.0785146	0.14506
TG-GATES	Rat	Liver	vivo	repeat	TG-RVivoLiverRepeat - methyldopa.High.8day	Methyldopa	H		8d	0.039749	0.120767		0.207857	0.672258	0.148419	-0.165635	-0.478431	-0.0811484	0.299012	-0.106703		-0.0684498	0.562756						0.0691098		0.872426	-0.0124654	0.393265	-0.0819735				-0.0596028		-1.9492		1.37445					0.0959218	0.513172	0.00562459
TG-GATES	Human	Liver	vitro	bolus	TG-HVitro PHH - WY-14643.High.2hr	WY-14643	H		2h	0.0685983	0.120792	0.0677647	0.03735	-0.0144462	-0.170724	0.00813347	0.115368	0.0377687	-0.0138977	0.0595947	-0.0915761		0.137889	0.146696	-0.0367265	-0.0592791	0.103236	-0.15595	-0.0965995	-0.1865	-0.0239556	0.0915041	0.0289272		-0.0770988	0.0932179	-0.0106081	0.0890325	0.0955676	0.0632711	-0.0231042	-0.150073	0.238789	0.0618596	0.0461443	-0.074019	0.0858746		0.00985397
TG-GATES	Rat	Liver	vitro	bolus	TG-Rvitro PRH - hexachlorobenzene.Middle.24hr	Hexachlorobenzene	M		24h	0.0197239	0.120834		0.169961	0.128688	0.129539	-0.0789034	0.0284942	0.0130646	0.169352	0.0135307	0.114746	-0.0305425	0.0313628	-0.00810837	-0.000671542			0.113937	0.0782123	0.0413728	-0.0218253	0.00977217	0.0430413	-0.033843				0.112445		-0.14903		-0.00693568				0.0332476	0.0141944	-0.0060447	-0.00574789
TG-GATES	Rat	Liver	vitro	bolus	TG-Rvitro PRH - thioridazine.High.2hr	Thioridazine	H		2h	0.0260444	0.120928		0.228528	0.26107	0.15655	0.0644063	0.307335	0.0455457	0.139795	0.0498197	-0.0736783	0.0648832	-0.373299	-0.00779156	0.234967			-0.0348213	-0.0943878	0.255806	0.244788	0.184199	0.00493335	0.0702975				-0.285382		-0.0995747		0.155765				0.0619353	0.00333268	-0.013127	-0.0094048
TG-GATES	Rat	Liver	vivo	bolus	TG-RVivoLiverSingle - acarbose.High.24hr	Acarbose	H		24h	0.0333379	0.121038		-0.271686	-0.234874	-0.188532	0.115251	0.232207	0.11509	0.0593567	0.0452802		0.441627	-0.108278						-0.0701834		0.291517	0.0649707	0.0822597	-0.1146				-0.217243		-0.272557		0.308938					0.0397711	0.25735	-0.0475974
TG-GATES	Rat	Liver	vivo	repeat	TG-RVivoLiverRepeat - griseofulvin.High.29day	Griseofulvin	H		29d	-0.1614	0.121048		0.49442	0.683909	-0.00457159	0.0185205	0.292386	-0.0617982	0.402276	-0.0532566		-0.379786	0.184018						0.0875353		-0.108974	0.063839	0.070221	0.00301288				0.342655		0.196866		0.267978					0.0391366	0.00430943	0.0318349
TG-GATES	Rat	Liver	vivo	repeat	TG-RVivoLiverRepeat - benzbromarone.Middle.8day	Benzbromarone	M		8d	-0.162235	0.121516		-0.502881	0.133447	-0.0836109	0.00721672	0.639561	0.258363	-0.587039	-0.0133397		2.13531	0.772139						-0.0080639		0.766858	0.0270637	-0.267556	-0.046326				-0.450119		0.111247		2.94323					0.164023	-0.303178	-0.0414261
TG-GATES	Rat	Kidney	vivo	repeat	TG-RVivoKidneyRepeat - caffeine.Middle.4day	Caffeine	M		4d	-0.0714573	0.121628	-0.0608168	0.113185	0.0812787	-0.115861	-0.108667	0.000621758	0.0737563	-0.110614	0.0862165	-0.225762	0.11599	0.183349		-0.0463393			-0.0232165	-0.0813542	-0.0120742	-0.0306238	0.110329	-0.0923049	-0.085886				0.39034		-0.0442502		0.100333				-0.0666794	0.133979	0.117845	-0.0748602
TG-GATES	Rat	Liver	vivo	repeat	TG-RVivoLiverRepeat - mexiletine.High.4day	Mexiletine	H		4d	0.125096	0.121644		-0.156116	0.340396	0.359539	0.0689786	0.240419	0.0505765	0.303631	0.267287		0.297014	-0.953817						0.0484131		1.12079	-0.00338993	-0.0658366	-0.0119674				0.203632		-0.233924		-0.00724626					0.180788	-0.235769	-0.0335552
TG-GATES	Rat	Liver	vitro	bolus	TG-Rvitro PRH - diazepam.Middle.8hr	Diazepam	M		8h	-0.0611593	0.121665		0.064992	0.0540204	0.214163	0.0312466	-0.15556	0.059981	0.114805	-0.215801	-0.0693098	0.111825	-0.0757647	0.120751	0.0433083			-0.0737319	-0.117664	0.347908	-0.132335	0.0197448	-0.0639445	-0.416124				0.117587		0.276488		-0.230347				-0.115157	0.0817743	-0.0713161	-0.0120852
TG-GATES	Rat	Liver	vivo	repeat	TG-RVivoLiverRepeat - labetalol.Middle.8day	Labetalol	M		8d	0.0461584	0.121715		-0.230204	-0.0659304	0.118779	0.130654	0.000997326	-0.0324863	0.129347	0.0569865		-0.157076	0.114341						0.0547474		-0.0796461	0.0946643	0.03997	0.0519344				-0.343072		0.138511		0.233285					0.169042	0.0523433	-0.0161113
TG-GATES	Rat	Liver	vitro	bolus	TG-Rvitro PRH - allopurinol.High.2hr	Allopurinol	H		2h	-0.00719647	0.121922		-0.047403	0.13165	0.0492365	-0.119648	0.128556	-0.0243388	0.0382531	-0.0324217	-0.0896251	-0.0721064	0.478209	0.106579	-0.0403052			-0.0397249	-0.0787317	-0.0685248	-0.0882376	0.0100989	0.1102	-0.098452				0.118546		-0.0457574		0.0449635				0.0231352	0.0200537	0.10276	0.00781769
TG-GATES	Human	Liver	vitro	bolus	TG-HVitro PHH - perhexiline.High.8hr	Perhexiline	H		8h	0.349893	0.12197	-0.111873	0.162306	0.000199234	-0.223088	-0.0903513	0.00389045	0.234813	0.207357	-0.244868	-0.340095		-0.121331	0.31835	0.182061	0.185972	-0.273112	0.0149294	0.332736	0.0962305	0.0382602	0.186294	0.245294		-0.187446	0.202345	-0.34026	0.00873895	-0.0813768	-0.0701868	-0.507858	-0.324024	-0.138081	-0.00260931	0.0123952	0.13926	0.319729		0.00787071
TG-GATES	Rat	Kidney	vivo	bolus	TG-RVivoKidneySingle - cisplatin.High.24hr	Cisplatin	H		24h	-0.0634881	0.121974	-0.0982447	2.46161	0.309626	0.0909077	-0.185242	-0.340278	0.287156	-0.107625	-0.0966511	0.0245703	0.153237	0.131558		0.160221			-0.000758201	-0.413213	0.00291731	0.181073	0.0128527	0.0196005	-0.0780736				0.762343		-0.013691		0.245561				-0.0971396	0.118783	-0.136607	-0.00275527
TG-GATES	Rat	Liver	vivo	repeat	TG-RVivoLiverRepeat - metformin.Low.4day	Metformin	L		4d	0.0630397	0.122158		0.0456532	0.0949025	-0.161821	-0.134576	0.152969	0.0621941	0.101951	-0.0732409		0.157459	0.0783824						-0.0269113		-0.0295147	0.0885637	0.0816738	-0.0204019				-0.866388		-0.142697		0.362926					0.0748121	-0.218646	0.0122663
TG-GATES	Rat	Liver	vivo	repeat	TG-RVivoLiverRepeat - thioridazine.High.29day	Thioridazine	H		29d	0.190482	0.122161		0.275763	0.487498	-0.0842132	0.273462	-0.210776	0.0742731	-0.268952	0.0224415		0.0493237	-0.15974						-0.0297451		0.564463	-0.000107991	0.374598	0.0994988				0.686048		-0.205406		2.62442					0.0884167	0.0530044	-0.0365343
TG-GATES	Rat	Liver	vivo	repeat	TG-RVivoLiverRepeat - chlormezanone.Low.29day	Chlormezanone	L		29d	-0.143038	0.122545		-0.150387	0.689138	0.0168714	0.148826	-0.283766	0.0489067	-0.0930374	-0.0158013		-0.099233	0.143634						0.0361097		0.0416639	0.0976106	-0.0760101	-0.0594556				0.17059		0.00425975		1.29888					0.0258928	-0.320667	-0.00825136
TG-GATES	Rat	Liver	vitro	bolus	TG-Rvitro PRH - mefenamic acid.Middle.8hr	Mefenamic acid	M		8h	0.101666	0.122581		-0.101758	0.00351147	0.0395257	-0.0891574	0.108706	0.0984344	-0.154632	0.170671	0.133254	0.159596	0.140545	0.04109	-0.137753			0.0259858	0.0661861	0.299645	-0.160719	-0.0956532	0.0962657	0.0351411				0.185859		-0.0875832		0.0973544				-0.0713072	0.0626534	0.185837	0.0290969
TG-GATES	Rat	Liver	vivo	bolus	TG-RVivoLiverSingle - thioridazine.Low.24hr	Thioridazine	L		24h	0.110405	0.123328		0.19311	-0.11925	-0.0423974	-0.2155	-0.0412814	-0.0903677	-0.0205946	-0.0572807		0.02619	-0.164879						-0.0614105		-0.407628	-0.00382084	0.229653	0.045315				0.263068		0.151518		0.622558					0.0705211	-0.22386	0.0493519
TG-GATES	Rat	Liver	vivo	repeat	TG-RVivoLiverRepeat - thioridazine.High.8day	Thioridazine	H		8d	0.163195	0.123338		-0.102265	0.747614	-0.0382748	0.0260684	0.0434091	0.246582	-0.388981	-0.1846		0.0945989	-0.37732						-0.0412718		0.402591	-0.000203783	0.130275	0.061125				-0.359698		-0.00344426		1.62576					-0.0437122	-0.453948	-0.0267362
TG-GATES	Rat	Liver	vivo	bolus	TG-RVivoLiverSingle - theophylline.Middle.24hr	Theophylline	M		24h	0.115725	0.123508		0.448952	-0.0266562	-0.272611	-0.1837	0.273112	0.141871	-0.20225	0.0227609		-0.121631	0.373327						-0.107599		0.609635	0.0634079	-0.166602	-0.0510159				-0.0767909		0.475664		-0.255493					0.11337	-0.00682393	-0.0119208
PREDICT-IV	Rat	Liver	vitro	repeat	PIV Rvitro Repeat PRH - ACTPHN_HD14_LFC	Acetaminophen	H		14d	-0.0068415	0.12352	0.00877191	0.0466191	-0.0309833	-0.0114648	-0.0281307	-0.0144521	-0.0355434	0.222131		0.0544212	0.161169	0.0337805	-0.0898968	-0.0347964	0.123137	-0.0174012	0.0133122	0.0494239	0.0298929	-0.0324271	0.00636102	-0.001236	-0.14892	-0.0998877	0.042948	-0.169653	0.0639338		-0.10946	0.253752	-0.0905213	-0.0806941		0.0603412	0.19474	-0.0361837	0.0647837	-0.026694
TG-GATES	Human	Liver	vitro	bolus	TG-HVitro PHH - bromoethylamine.Middle.24hr	Bromoethylamine	M		24h	-0.0358959	0.123649	0.0930376	-0.138168	-0.186305	-0.151901	-0.0786395	-0.206004	0.215308	-0.153753	0.0276109	0.123512		-0.561465	0.293776	-0.0357736	-0.132459	0.047421	0.0774529	-0.183072	0.034392	-0.129207	-0.058079	0.0053258		0.0503709	0.0819957	0.432859	0.0152121	0.0897609	0.148243	0.0628669	-0.049062	0.0160461	-0.0416584	0.0558948	-0.0615161	-0.0225844		-0.150758
TG-GATES	Rat	Liver	vivo	bolus	TG-RVivoLiverSingle - disulfiram.Low.9hr	Disulfiram	L		9h	-0.130898	0.123786		-0.343969	0.132057	0.251349	-0.0792985	-0.728339	-0.030372	0.133627	0.044658		0.204071	0.894102						0.0261087		0.34538	-0.0426906	-0.255575	-0.0603181				0.662897		0.0298909		-0.0295256					0.0247302	-0.304773	-0.0379502
TG-GATES	Rat	Liver	vitro	bolus	TG-Rvitro PRH - diazepam.Low.8hr	Diazepam	L		8h	0.016005	0.123823		0.125764	0.119302	0.189069	-0.0349509	0.000393132	0.0277279	-0.000828306	0.0020461	-0.0815072	0.0346385	0.0733922	-0.00824861	0.0431961			0.000653292	-0.059297	0.13545	-0.117905	-0.0454585	-0.139462	-0.116739				0.147977		0.0507698		-0.0144701				-0.0841135	-0.0522362	0.0484228	0.0198853
TG-GATES	Human	Liver	vitro	bolus	TG-HVitro PHH - allopurinol.Middle.8hr	Allopurinol	M		8h	0.034796	0.123933	-0.0720783	0.0557769	0.0561166	-0.0661978	-0.0199369	0.051803	-0.0311247	0.114451	-0.0871405	-0.12116		0.0718135	-0.0458171	-0.0707581	-0.118572	0.0303262	-0.0458229	0.0458762	-0.0251466	-0.124604	-0.00542482	0.0924632		-0.0423472	0.0726636	0.0308396	-0.0227418	0.0419105	-0.0154278	0.103764	0.0604056	-0.0920578	-0.0515544	-0.124638	-0.0505455	0.0338235		0.00481199
TG-GATES	Rat	Liver	vivo	repeat	TG-RVivoLiverRepeat - propylthiouracil.High.4day	Propylthiouracil	H		4d	-0.273418	0.124017		-0.260197	1.6343	0.228772	-0.0235231	0.449052	0.152242	-0.214519	0.246041		-0.335999	0.311629						-0.0551243		-0.14777	-0.0961551	0.126648	-0.0648618				0.373854		0.629738		1.31519					-0.0476234	-0.102426	-0.0421886
TG-GATES	Rat	Kidney	vivo	bolus	TG-RVivoKidneySingle - valproic acid.Middle.9hr	Valproic acid	M		9h	-0.00592509	0.124115	-0.00852062	0.0274523	0.12578	-0.0559791	0.23466	0.0552507	-0.0233648	0.183124	0.0559986	0.0748668	0.0586663	-0.137495		0.0717225			-0.0886238	0.0598225	-0.151275	-0.274605	-0.0216552	0.324697	-0.0773226				-0.375822		-0.142363		0.0687738				-0.13382	-0.567022	-0.0594121	0.285187
TG-GATES	Rat	Liver	vivo	repeat	TG-RVivoLiverRepeat - thioridazine.High.15day	Thioridazine	H		15d	0.191981	0.124247		0.103958	0.530484	-0.24527	-0.0433618	0.0574803	0.146863	-0.36219	0.0877785		-0.118791	0.0475025						-0.080431		0.350251	-0.00250639	0.355951	-0.0580646				0.137782		-0.0515319		2.93282					-0.016238	0.144219	-0.0514825
TG-GATES	Rat	Liver	vivo	bolus	TG-RVivoLiverSingle - fluphenazine.High.9hr	Fluphenazine	H		9h	-0.643514	0.124306		-1.26209	-0.203595	-0.180179	0.0105815	-0.0211033	0.0222464	-0.471603	0.054704		0.227941	-0.0361605						0.150569		0.454799	0.0363415	0.0294741	-0.1302				-0.258626		-0.337761		-0.197293					0.0900175	-0.423298	0.0240798
TG-GATES	Rat	Liver	vivo	repeat	TG-RVivoLiverRepeat - nitrosodiethylamine.Middle.8day	Nitrosodiethylamine	M		8d	-0.237801	0.124334		-0.208434	0.0159846	-0.70058	-0.159468	0.447947	0.420157	-0.192153	0.462474		0.150094	0.029628						-0.0693411		-0.0264792	-0.103905	0.0198638	-0.0855902				-1.36126		-0.298964		2.6661					0.00324663	0.117178	0.00186591
TG-GATES	Rat	Liver	vivo	bolus	TG-RVivoLiverSingle - simvastatin.Middle.24hr	Simvastatin	M		24h	-0.298647	0.124335		-0.0584239	0.119903	-0.153701	-0.189679	0.807759	0.149277	0.0737885	0.345196		0.501548	0.0678493						-0.260548		0.358951	-0.19781	-0.1088	-0.183929				-0.739657		0.39877		0.421109					-0.0151958	0.163099	-0.0204176
TG-GATES	Rat	Liver	vivo	repeat	TG-RVivoLiverRepeat - amphotericin B.High.15day	Amphotericin B	H		15d	0.175687	0.124552		-0.0818162	-0.080062	-0.372967	-0.075728	-0.359964	0.19112	-0.0732742	-0.0336866		0.19728	-0.19605						0.030084		0.0416297	-0.25887	-0.0135675	-0.00361966				0.941602		-0.377731		0.353079					0.0982884	-0.129783	0.0185264
TG-GATES	Rat	Liver	vivo	repeat	TG-RVivoLiverRepeat - ibuprofen.Middle.4day	Ibuprofen	M		4d	-0.0510735	0.124602		-0.140781	-0.0214719	-0.045519	-0.2416	0.452166	0.109187	0.0379598	-0.00112929		0.0095166	0.167195						-0.0190354		0.560604	-0.150977	0.104912	0.108964				-0.0421522		0.154857		0.437618					0.0690584	-0.181968	-0.00706057
TG-GATES	Rat	Liver	vitro	bolus	TG-Rvitro PRH - mexiletine.Low.24hr	Mexiletine	L		24h	0.0349279	0.124655		-0.0666756	0.273462	-0.197249	-0.129688	-0.103008	-0.00691498	-0.120127	0.0133589	0.129313	0.126733	0.119415	-0.0591303	-0.0555429			0.165776	-0.00288584	0.0265	-0.217225	0.0822279	-0.0301081	0.0755417				0.340486		-0.305371		-0.0376711				0.174099	0.112125	0.0184893	0.00353105
TG-GATES	Rat	Liver	vivo	repeat	TG-RVivoLiverRepeat - tacrine.High.8day	Tacrine	H		8d	0.035942	0.124716		0.156479	-0.040967	-0.118453	-0.141774	-0.415891	0.0482809	0.380745	-0.0818157		-0.185496	0.324961						-0.00897289		0.515594	-0.130927	0.194038	-0.0913647				0.0781843		-0.112351		-0.289616					0.101219	0.197193	0.0480015
TG-GATES	Rat	Liver	vivo	bolus	TG-RVivoLiverSingle - moxisylyte.High.9hr	Moxisylyte	H		9h	-0.0226447	0.124718		0.0316637	0.0701183	0.0404433	0.00203843	0.0935112	-0.0295045	0.0615181	-0.0792683		0.0430082	-0.207566						-0.0564097		0.455869	0.0559743	0.136035	-0.0630225				-0.196376		-0.0262431		0.0908037					0.24287	-0.0785299	0.0127502
TG-GATES	Rat	Liver	vivo	bolus	TG-RVivoLiverSingle - rosiglitazone maleate.High.9hr	Rosiglitazone	H		9h	-0.108335	0.12491		-0.504973	1.29387	-0.115236	0.00422952	-0.680049	0.0760188	-0.0781381	0.0453939		2.13676	-0.195736						-0.050885		-0.100409	0.00317274	0.133036	-0.0281681				0.317811		-0.610506		0.512856					-0.160639	-0.21205	-0.0240045
TG-GATES	Rat	Liver	vivo	bolus	TG-RVivoLiverSingle - phenytoin.High.6hr	Phenytoin	H		6h	-0.173084	0.124943		0.192102	-0.119495	-0.0895072	0.0652071	-0.134083	0.103205	0.323156	-0.020034		-0.257448	-0.188495						-0.051063		0.915016	0.170161	0.0818395	0.207286				-2.6071		0.140341		0.122637					-0.0664939	0.0864143	0.00468575
TG-GATES	Human	Liver	vitro	bolus	TG-HVitro PHH - phalloidin.Low.24hr	Phalloidin	L		24h	0.378554	0.124961	-0.0165164	-0.162039	-0.0106285	-0.0394243	-0.0186187	-0.184944	0.377443	-0.226158	-0.211071	0.0515881		-0.283335	0.195787	-0.0585417	0.0272433	0.234653	0.158459	0.203447	-0.375996	0.013106	-0.0798774	0.0818191		-0.0610564	0.194721	-1.13343	-0.160063	-0.0804465	0.0113689	-0.170611	-0.655791	-0.077149	-0.0298901	-0.079304	-0.178505	0.103644		-0.00623049
TG-GATES	Rat	Liver	vivo	repeat	TG-RVivoLiverRepeat - glibenclamide.Middle.29day	Glibenclamide	M		29d	0.0118421	0.125054		-0.0933733	0.0655032	0.0205002	-0.230965	0.0639428	0.108563	0.173291	-0.119519		0.15051	-0.370408						-0.00685365		-0.0131836	0.239389	-0.239773	0.0185358				-0.084274		0.0390486		0.131463					0.110546	0.320835	-0.00469343
TG-GATES	Rat	Liver	vitro	bolus	TG-Rvitro PRH - fenofibrate.Middle.24hr	Fenofibrate	M		24h	0.00987265	0.125077		-0.2306	-0.0761723	0.0100372	-0.112039	0.151511	0.140224	0.166927	-0.0594475	0.00215529	0.47723	0.0928345	-0.0689941	-0.146121			-0.0181004	-0.085348	0.0781238	-0.00278937	-0.0852095	0.111771	-0.117323				0.0705065		0.0542101		0.757157				0.0941097	0.0348073	0.120942	-0.00696302
TG-GATES	Human	Liver	vitro	bolus	TG-HVitro PHH - carbon tetrachloride.High.2hr	Carbon tetrachloride	H		2h	0.0339276	0.125092	-0.160177	0.0199232	0.0624155	0.21148	-0.0785907	0.00465225	0.0414962	0.00308152	0.0536306	0.0484654		0.0616259	-0.0349398	0.0133386	-0.0848202	-0.0564552	0.0287255	0.0505625	0.0334946	0.0474016	-0.0519693	-0.029387		-0.0065948	0.0856892	0.0930687	-0.0129318	-0.00956623	-0.043461	-0.0190743	0.0490189	0.0325928	-0.0725153	0.0426202	-0.0466193	0.0529434		0.0498794
TG-GATES	Rat	Liver	vivo	repeat	TG-RVivoLiverRepeat - tamoxifen.Middle.15day	Tamoxifen	M		15d	0.0795413	0.125096		0.0350051	0.191943	-0.189756	-0.0886512	0.425993	0.0378391	-0.43599	-0.0100057		0.65665	-0.299877						0.150762		0.50852	-0.00618154	0.967896	-0.0552361				-0.490052		0.211872		1.99541					0.061276	0.390006	0.0136252
TG-GATES	Human	Liver	vitro	bolus	TG-HVitro PHH - phenylanthranilic acid.Middle.8hr	Phenylanthranilic acid	M		8h	-0.00950109	0.125154	-0.0545936	0.0801373	0.0659881	-0.098846	-0.206635	0.0934296	0.040619	-0.0904548	0.0960957	-0.00959838		-0.0490345	0.150692	0.0689966	0.302943	0.0629783	-0.0970677	0.114931	-0.113931	-0.330107	-0.0556279	0.145184		-0.0420465	0.172972	-0.181806	0.0570986	-0.0840174	-0.21951	0.0516061	-0.11784	0.0404666	0.129341	0.0196394	0.011923	0.0700642		0.00149268
TG-GATES	Rat	Liver	vivo	bolus	TG-RVivoLiverSingle - naphthyl isothiocyanate.Middle.3hr	Naphthyl isothiocyanate	M		3h	0.0717283	0.125163		-0.370785	-0.0226331	-0.246112	-0.0675855	-0.281485	0.0304749	-0.387052	-0.00477182		-0.155145	-0.342748						-0.100271		0.27139	0.0399648	-0.045937	-0.109547				0.390651		-0.350298		-0.0528764					-0.0935034	0.214239	0.0293056
TG-GATES	Rat	Liver	vivo	repeat	TG-RVivoLiverRepeat - methapyrilene.Low.29day	Methapyrilene	L		29d	-0.0970625	0.125252		0.141082	0.151359	0.0711342	-0.228637	-0.539918	-0.0469722	-0.143954	0.0424171		0.627021	0.0296523						-0.0530439		0.385143	0.238148	0.0423056	0.0274976				0.901211		0.189887		1.8223					-0.0648435	-0.0374462	0.0102053
TG-GATES	Rat	Liver	vivo	repeat	TG-RVivoLiverRepeat - quinidine.Low.15day	Quinidine	L		15d	0.0583139	0.125369		0.0738313	0.159778	0.12026	0.0370015	-0.0836696	0.0284542	-0.126057	-0.191161		0.00602864	-0.172794						0.0255225		-0.152199	0.133056	-0.0563954	0.0517038				-0.251479		0.0321788		-0.617152					0.0358434	0.172813	0.0172388
TG-GATES	Rat	Liver	vitro	bolus	TG-Rvitro PRH - nifedipine.Low.8hr	Nifedipine	L		8h	0.0270068	0.125511		0.0762686	0.10201	-0.0268447	0.0510791	-0.0925944	-0.0180087	-0.175941	-0.070864	0.110948	0.0123117	-0.0010179	-0.0357762	-0.162243			-0.1212	-0.193294	-0.00484537	-0.188624	0.345128	-0.149771	-0.025169				0.0476542		0.0038383		-0.143229				-0.0484678	0.119033	0.0582035	-0.0252068
TG-GATES	Rat	Liver	vitro	bolus	TG-Rvitro PRH - terbinafine.Low.24hr	Terbinafine	L		24h	-0.0585461	0.125535		-0.0900751	0.240032	0.0234743	-0.304681	-0.0880553	0.0138042	-0.123715	0.0325673	-0.0954111	0.0236467	0.0194359	-0.00627707	0.155882			-0.0488768	0.0771575	0.0561131	-0.0508689	-0.0247561	-0.068126	-0.0275905				0.00854894		0.233956		0.0728698				0.0259177	-0.0486995	0.141578	-0.0196339
TG-GATES	Rat	Liver	vitro	bolus	TG-Rvitro PRH - pemoline.Middle.2hr	Pemoline	M		2h	-0.0226117	0.125546		-0.171372	0.352403	-0.170183	0.0487654	-0.0207482	-0.0423905	-0.149432	-0.0931958	-0.0250786	-0.109044	0.0202862	0.140206	0.07999			-0.144347	-0.0782917	-0.0799092	0.115556	0.0998784	-0.0657151	-0.0301013				0.201506		0.217071		0.00496754				0.0299614	0.131032	-0.0295355	-0.0492966
TG-GATES	Rat	Liver	vivo	repeat	TG-RVivoLiverRepeat - theophylline.Low.29day	Theophylline	L		29d	-0.0607527	0.125731		0.445616	0.116215	0.182296	-0.14478	0.572184	0.0535861	-0.765868	-0.0461737		-0.00387135	0.133875						-0.0426179		0.338556	0.114033	-0.302578	-0.0550723				-0.572775		0.482362		-0.330277					0.27136	-0.0915097	0.0134891
TG-GATES	Rat	Liver	vivo	repeat	TG-RVivoLiverRepeat - naproxen.Low.29day	Naproxen	L		29d	0.072986	0.125748		0.208816	-0.0792123	-0.162424	-0.173831	-0.224436	0.000156613	0.0765354	0.115735		0.154369	0.193829						0.00485439		0.396277	-0.0837358	0.15034	0.0947713				0.625315		0.0218427		0.701485					-0.0828004	0.13492	0.0767046
TG-GATES	Rat	Liver	vitro	bolus	TG-Rvitro PRH - dantrolene.High.8hr	Dantrolene	H		8h	0.208589	0.125779		0.37699	0.296082	0.303987	-0.0606538	0.0923575	-0.113656	0.0996131	0.217147	0.00829672	0.290205	0.266198	0.0279775	0.217197			0.175854	0.0535303	0.237763	0.254643	-0.354156	-0.0166421	0.170456				-0.157234		0.259333		0.201681				0.0165562	0.0836486	0.0533703	-0.001533
TG-GATES	Human	Liver	vitro	bolus	TG-HVitro PHH - methapyrilene.High.2hr	Methapyrilene	H		2h	-0.00484089	0.125836	0.141092	-0.0595371	-0.133069	-0.0551041	-0.0983898	-0.0287264	0.210205	0.080287	-0.0245648	0.0804103		0.0734333	0.227599	-0.0166239	-0.0264967	-0.0992774	-0.0967312	0.0166488	-0.140423	0.399597	0.165772	0.0016502		0.0254305	0.078534	-0.170025	-0.0358869	-0.048698	0.00747966	0.0394551	0.0219567	0.146592	-0.0463565	-0.0475708	-0.0296501	-0.0634134		0.0708498
TG-GATES	Rat	Liver	vitro	bolus	TG-Rvitro PRH - carboplatin.Middle.8hr	Carboplatin	M		8h	-0.13522	0.125892		-0.161256	0.293185	-0.430112	-0.488476	-0.259596	0.185542	-0.296894	-0.0721164	-0.230865	-0.128194	-0.036069	-0.172276	0.206382			0.00279232	-0.801465	0.638358	0.39452	-0.164857	0.132589	-0.36008				0.111742		0.0984596		-0.215483				0.0664242	0.365453	0.393963	0.0498683
TG-GATES	Rat	Liver	vitro	bolus	TG-Rvitro PRH - coumarin.Middle.8hr	Coumarin	M		8h	0.11541	0.12604		0.28751	0.0734953	0.260696	-0.079744	-0.0874051	0.0256327	-0.319125	0.04381	0.0305764	0.0353019	0.0866994	-0.125805	-0.0649341			0.0402164	0.0479983	0.233076	-0.0716268	0.0277707	-0.00587783	-0.0813997				0.263456		-0.130507		0.0566885				0.0473473	0.0333605	0.203305	0.0890381
TG-GATES	Human	Liver	vitro	bolus	TG-HVitro PHH - ethinylestradiol.High.24hr	Ethinylestradiol	H		24h	0.0834066	0.126266	0.0516207	0.214202	0.15569	-0.00925795	-0.18264	-0.000459463	0.0169548	0.49537	-0.127363	0.0452991		0.0566535	0.0218873	0.0743514	-0.0821443	-0.135872	0.0786074	0.175448	0.0949384	0.122446	-0.108697	-0.0262986		-0.0265346	0.15508	-0.0782075	0.0397724	0.0464449	-0.0036324	0.0159975	0.0152734	0.0463299	0.0484073	0.085327	0.0875513	0.0710405		-0.0087576
TG-GATES	Rat	Liver	vitro	bolus	TG-Rvitro PRH - iproniazid.High.2hr	Iproniazid	H		2h	-0.00819352	0.126353		0.176569	-0.00883191	-0.143837	0.0953405	-0.0174418	-0.0145382	0.021708	0.0623253	0.102488	-0.0677989	0.0342216	0.00450807	0.238922			0.180592	0.0166864	0.000705649	-0.0489789	-0.118882	-0.0788564	-0.0123298				0.440472		0.337288		0.0525588				-0.0403162	0.00640774	-0.0988765	-0.0187293
TG-GATES	Rat	Liver	vivo	repeat	TG-RVivoLiverRepeat - gentamicin.High.29day	Gentamicin	H		29d	6.20203e-05	0.126427		0.00353028	0.146439	-0.649127	0.0140352	-0.115325	0.0556815	-1.40423	-0.0329338		-0.0213486	0.0822716						-0.0405515		0.808408	0.062937	-0.272784	0.356854				0.981411		-0.130374		0.330088					0.00564053	0.436426	-0.00557733
TG-GATES	Rat	Liver	vivo	repeat	TG-RVivoLiverRepeat - methyldopa.Middle.29day	Methyldopa	M		29d	0.114522	0.126508		0.220391	0.430253	-0.302416	-0.038091	-0.12861	0.0373976	-0.304924	0.0709678		0.4961	-0.310857						-0.00220068		0.226303	0.0532001	0.583352	0.0774744				-0.198057		-0.828739		1.91226					-0.0830955	0.206679	0.0132777
TG-GATES	Rat	Liver	vivo	repeat	TG-RVivoLiverRepeat - ibuprofen.Middle.15day	Ibuprofen	M		15d	-0.0539338	0.126512		-0.0946494	0.028446	-0.188985	-0.0332862	-0.147447	0.0221806	0.004482	0.0117885		-0.0568724	0.0454425						0.068203		0.308095	-0.0843157	0.150901	0.0749597				0.967857		-0.307502		0.281354					-0.000337739	0.112663	-0.00796706
TG-GATES	Rat	Liver	vitro	bolus	TG-Rvitro PRH - ketoconazole.Middle.2hr	Ketoconazole	M		2h	-0.0140953	0.126765		-0.0405454	0.294717	-0.0645029	-0.0639923	0.0635425	0.0407863	0.0943203	-0.0110402	0.0196106	0.0551301	0.0722946	0.0286945	0.0787274			0.00525403	-0.102474	0.0648196	0.164938	-0.0331161	0.000937598	0.0456631				-0.0519226		-0.00149559		0.101929				-0.0164774	0.128587	0.169844	0.0121334
TG-GATES	Human	Liver	vitro	bolus	TG-HVitro PHH - ticlopidine.High.24hr	Ticlopidine	H		24h	-0.0261953	0.126922	0.049474	0.340782	0.151289	0.160222	0.0306674	0.0836175	-0.0746228	0.140975	0.206925	0.381326		0.0986786	-0.263757	-0.0655751	-0.268742	0.149631	0.112624	0.070582	0.115648	0.304673	0.00868688	0.0619691		0.0928029	-0.0828604	0.187866	0.0392366	0.0748485	0.157342	0.0497846	0.207188	-0.0639981	-0.0355821	0.0379769	0.181097	0.0281016		0.0469656
TG-GATES	Rat	Kidney	vivo	repeat	TG-RVivoKidneyRepeat - methyltestosterone.Low.15day	Methyltestosterone	L		15d	0.045614	0.126957	-0.174888	0.138973	0.0660681	-0.0602498	-0.344611	0.125416	-0.000309824	0.392771	-0.00214721	-0.0101729	-0.0238859	0.265892		0.0552088			0.118656	0.0242702	0.0295074	-0.105283	-0.0145102	-0.0934947	0.11596				-0.0673796		0.051959		-0.160811				-0.0118489	-0.257671	0.0882237	-0.0979529
TG-GATES	Rat	Liver	vivo	repeat	TG-RVivoLiverRepeat - chlormadinone.Low.4day	Chlormadinone	L		4d	0.03947	0.127017		0.152965	0.0711674	-0.159863	0.202114	-0.561417	0.232149	0.489384	0.0931041		0.0187259	0.63384						0.0642177		0.0503174	-0.0639973	0.107163	-0.186263				0.507035		0.0946936		0.154325					0.14371	0.371267	-0.0150911
TG-GATES	Human	Liver	vitro	bolus	TG-HVitro PHH - griseofulvin.High.8hr	Griseofulvin	H		8h	0.0014398	0.127165	-0.143959	0.144377	0.0742704	-0.0631193	-0.0232595	0.0239186	-0.110288	0.0173159	0.174045	-0.034283		0.0163393	-0.166471	-0.0731549	-0.238561	0.180351	-0.109429	0.226798	0.0176689	-0.0966386	-0.0637131	0.037716		-0.201305	0.207925	-0.258401	-0.0771852	0.010999	-0.0968955	0.144094	-0.0154528	-0.204628	-0.0631786	0.114568	0.183125	0.104551		-0.0632107
TG-GATES	Rat	Liver	vitro	bolus	TG-Rvitro PRH - valproic acid.Middle.8hr	Valproic acid	M		8h	-0.330475	0.127242		-1.2976	-0.818368	-0.769596	0.00352733	-0.581887	0.090812	-0.22661	-0.104819	0.208815	0.37304	0.0777329	0.223496	-0.165816			-0.129147	0.315682	-0.0605212	-0.201411	0.00468154	0.432742	-0.834611				0.0145033		0.220569		0.674713				-0.218482	-0.454813	-0.0414996	-0.047589
TG-GATES	Rat	Liver	vivo	repeat	TG-RVivoLiverRepeat - ciprofloxacin.Middle.4day	Ciprofloxacin	M		4d	0.033626	0.127347		-0.110116	0.124807	-0.375139	0.093695	-0.118846	0.0225143	-0.112796	0.0775519		-0.0530417	0.140854						-0.0792391		0.812461	0.0197096	-0.0671481	-0.0382553				0.398429		-0.0238611		0.235802					0.252696	0.00803167	0.00396302
TG-GATES	Rat	Liver	vivo	bolus	TG-RVivoLiverSingle - chlorpheniramine.Middle.3hr	Chlorpheniramine	M		3h	0.0331798	0.127493		0.189463	0.0373346	-0.148525	-0.301411	-0.544305	0.0465911	0.610589	0.198786		-0.405706	0.498534						0.0626522		-0.222683	-0.129344	0.00954198	0.288669				0.4032		0.0297244		-0.274929					-0.22113	-0.208401	0.0116713
TG-GATES	Rat	Liver	vivo	repeat	TG-RVivoLiverRepeat - vitamin A.Low.29day	Vitamin A	L		29d	-0.0568761	0.127617		-0.080811	-0.24377	-0.0936112	0.0206575	0.0614797	0.0448533	0.0945001	0.0407047		0.0515082	-0.16917						-0.0180387		-0.092944	-0.0653512	-0.0296977	-0.138962				0.298743		-0.273247		-0.678335					-0.152529	0.610583	0.0343919
TG-GATES	Rat	Liver	vitro	bolus	TG-Rvitro PRH - danazol.Middle.24hr	Danazol	M		24h	0.074038	0.127726		0.106598	0.0103412	-0.195862	0.00340356	-0.00473007	-0.0139715	0.187732	0.132913	0.188453	-0.055415	0.0797167	0.00720388	0.283878			-0.0515336	0.0374341	0.0482109	-0.0607783	-0.0227665	0.191383	0.14073				0.0449303		-0.142533		0.0543322				-0.101609	0.0632549	0.0946963	-0.0317737
TG-GATES	Rat	Liver	vivo	bolus	TG-RVivoLiverSingle - caffeine.High.3hr	Caffeine	H		3h	-0.129103	0.12792		-0.2505	0.181412	-0.240296	0.175718	-0.108993	-0.0716258	0.300228	-0.0480647		-0.0502376	0.146474						0.298138		1.31476	0.111142	0.154351	0.00617908				-1.74063		0.134579		-0.496244					-0.210736	-0.185295	-0.00136952
TG-GATES	Rat	Liver	vivo	repeat	TG-RVivoLiverRepeat - furosemide.Low.8day	Furosemide	L		8d	0.171267	0.128018		0.254512	-0.421927	-0.556893	0.037744	0.200889	0.0174926	0.0252659	0.179617		-0.204925	0.254757						-0.0197896		-0.0358929	0.0220014	-0.141362	0.130215				0.343341		0.338143		-0.866494					0.0603323	0.246784	-0.00509342
TG-GATES	Rat	Liver	vivo	repeat	TG-RVivoLiverRepeat - doxorubicin.High.15day	Doxorubicin	H		15d	-0.2772	0.128119		-0.48998	-0.0702952	-0.361711	-0.208219	0.803129	0.217809	-0.420677	-0.0133664		0.144406	-0.516669						0.038052		0.353182	0.0731679	-0.104799	-0.0341281				-0.868486		-0.511642		1.78562					0.200005	-0.0641992	0.0385517
TG-GATES	Human	Liver	vitro	bolus	TG-HVitro PHH - penicillamine.Middle.8hr	Penicillamine	M		8h	-0.259988	0.128119	-0.147945	0.118147	-0.239178	-0.0927905	-0.0591827	-0.0121289	0.062761	-0.117855	-0.0449656	-0.160147		0.075486	-0.00270909	0.0494862	0.128132	0.0756008	0.00403253	-0.0752536	-0.10399	0.232453	-0.242441	0.101587		0.10201	0.173609	0.0897138	0.00529173	0.0133753	0.0934371	-0.155252	0.032708	-0.191482	0.0259418	-0.0228682	-0.164617	-0.0469017		0.0115102
TG-GATES	Rat	Liver	vivo	bolus	TG-RVivoLiverSingle - chlorpheniramine.Middle.24hr	Chlorpheniramine	M		24h	0.0119335	0.128184		-0.182566	0.419844	0.0530893	0.0745927	0.141333	0.101363	-0.248752	-0.0279427		0.0319976	-0.126868						-0.050765		0.267882	-0.0202134	0.157511	-0.03194				0.20852		-0.353089		0.559882					0.0324783	0.0995558	0.0289703
TG-GATES	Rat	Liver	vivo	bolus	TG-RVivoLiverSingle - ethambutol.Middle.3hr	Ethambutol	M		3h	0.025107	0.128278		0.2073	0.253024	-0.080889	-0.253182	0.301831	0.00404598	-0.100325	0.0478337		0.163946	-0.119156						-0.0343208		0.802167	0.0858932	-0.080699	0.0710135				-0.7109		0.134576		0.65381					0.0284459	0.370723	-0.0192845
TG-GATES	Rat	Kidney	vivo	repeat	TG-RVivoKidneyRepeat - bromoethylamine.Low.8day	Bromoethylamine	L		8d	-0.00143484	0.128287	-0.130184	0.233761	-0.0511062	0.106847	0.140146	-0.0468702	-0.039847	0.00906555	-0.0940076	0.250945	0.0367992	-0.358588		-0.0125302			-0.0651982	-0.107122	-0.0736691	0.155721	-0.0633512	-0.201941	-0.165894				-0.496354		0.151231		0.0272841				-0.039206	0.0765673	0.142992	-0.121458
TG-GATES	Rat	Liver	vivo	bolus	TG-RVivoLiverSingle - nitrosodiethylamine.Middle.24hr	Nitrosodiethylamine	M		24h	-0.188593	0.128287		0.0706032	0.343619	-0.422995	0.114583	-0.387299	0.383993	-0.675959	0.587502		0.0873079	-0.142239						-0.182407		0.34012	-0.159078	0.131355	-0.132201				-1.04667		-0.0278878		2.11089					0.062623	-0.22861	0.0172779
TG-GATES	Rat	Liver	vivo	repeat	TG-RVivoLiverRepeat - moxisylyte.High.15day	Moxisylyte	H		15d	-0.0177907	0.128304		-0.254511	0.294172	-0.327204	0.152127	0.337979	0.0580577	-0.283395	0.140309		0.00266862	-0.505807						-0.0804325		0.225367	0.06793	-0.0819647	-0.127673				-0.746341		0.0753525		0.662913					-0.0348917	0.139022	-0.0113604
TG-GATES	Rat	Liver	vivo	bolus	TG-RVivoLiverSingle - dantrolene.Low.24hr	Dantrolene	L		24h	0.20099	0.128321		0.0772517	0.815569	0.171887	0.10322	-0.227238	-0.0173844	-0.189141	-0.0375479		0.29274	0.118734						-0.103129		-0.436806	-0.187878	0.216896	-0.168419				1.20526		-0.27067		0.844668					-0.139034	0.173706	-0.0296191
TG-GATES	Human	Liver	vitro	bolus	TG-HVitro PHH - azathioprine.High.8hr	Azathioprine	H		8h	0.264569	0.12836	-0.190811	0.399013	-0.0936044	-0.260582	0.156912	0.0845921	0.472758	-0.0899075	0.0445351	0.0581882		-0.17395	-0.346031	-0.239941	-0.0959621	-0.00168756	0.166222	0.148129	0.371485	0.386914	-0.0859736	0.328972		-0.22262	-0.120628	0.811603	0.166757	0.131978	0.120254	-0.143784	-0.0851535	-0.0848259	0.124942	0.00531159	-0.16669	0.275849		0.0545575
TG-GATES	Rat	Liver	vivo	bolus	TG-RVivoLiverSingle - 3-methylcholanthrene.Middle.24hr	3-Methylcholanthrene	M		24h	-0.0291529	0.128377		0.0351998	0.309916	0.207867	0.020805	-0.185426	0.147001	-0.161152	0.135674		-0.0954063	-0.125898						-0.074135		0.307244	0.0701464	-0.190207	0.0848413				-1.68323		0.451842		0.129773					-0.0476816	-0.226924	-0.030945
TG-GATES	Human	Liver	vitro	bolus	TG-HVitro PHH - adapin.Low.24hr	Adapin	L		24h	0.010682	0.128423	-0.167117	-0.0627641	0.0391761	-0.0242666	-0.0970124	0.0610725	-0.177491	-0.00861572	0.14337	-0.0327721		0.12184	-0.209139	-0.0766137	-0.0305626	0.0400536	-0.044484	0.0244986	0.197204	-0.104683	-0.10028	-0.0306255		0.0421868	-0.199718	0.0196344	-0.148966	-0.0122382	-0.00590091	-0.010878	-0.0388522	0.0697595	0.00491464	-0.12849	0.0467815	-0.157851		-0.0201416
TG-GATES	Rat	Liver	vivo	bolus	TG-RVivoLiverSingle - ethinylestradiol.Low.3hr	Ethinylestradiol	L		3h	0.202176	0.128657		-0.198864	-0.315969	0.0655497	-0.0667571	-0.24747	0.0153516	0.228317	0.0849502		0.0586973	0.0459497						0.00583335		-0.100027	0.0356214	0.0910938	0.0371239				0.837786		0.378883		-0.345516					0.12874	0.711555	0.00102074
TG-GATES	Rat	Kidney	vivo	bolus	TG-RVivoKidneySingle - nitrofurantoin.Middle.6hr	Nitrofurantoin	M		6h	-0.0234264	0.128659	-0.045856	0.392906	-0.0433283	0.0628716	-0.0651452	0.0234448	0.0894445	0.0193511	0.0873193	0.230913	0.0146964	0.127869		0.14536			-0.0749041	-0.0723079	-0.0367965	0.1411	0.0845594	-0.0368355	0.214497				0.61308		0.0570244		0.0541919				-0.0502647	0.245346	-0.157705	-0.0763096
TG-GATES	Rat	Liver	vivo	bolus	TG-RVivoLiverSingle - ethinylestradiol.Low.24hr	Ethinylestradiol	L		24h	0.00322768	0.128801		-0.232456	-0.243328	0.0657311	0.0811631	-0.045871	0.0941838	0.119554	0.0752533		-0.182231	0.0109622						0.0440431		0.098871	0.0220806	0.393505	-0.10443				0.481204		-0.0815274		-0.383942					0.125424	-0.113227	0.00697902
TG-GATES	Rat	Liver	vitro	bolus	TG-Rvitro PRH - mexiletine.High.24hr	Mexiletine	H		24h	-0.0322523	0.128809		0.00519856	0.164962	-0.160029	-0.095086	-0.162258	0.0441947	-0.334606	0.103582	0.152188	-0.0086171	0.0343518	-0.0890131	0.169314			0.19209	0.0163241	-0.0787738	-0.141436	0.115613	-0.0396646	0.0462856				-0.166454		-0.569885		-0.0611126				0.156557	0.16818	0.0262423	-0.00611049
TG-GATES	Rat	Liver	vivo	bolus	TG-RVivoLiverSingle - cephalothin.High.3hr	Cephalothin	H		3h	0.184794	0.128817		0.356593	0.245457	0.463503	-0.0819867	-0.472164	0.104473	-0.084485	-0.127153		-0.256713	0.78686						-0.10657		0.991066	0.0561058	0.0587765	0.0894905				1.04838		0.127451		-0.208524					0.00443313	-0.347321	-0.0277226
TG-GATES	Rat	Liver	vivo	bolus	TG-RVivoLiverSingle - rifampicin.Low.3hr	Rifampicin	L		3h	-0.158146	0.12928		-0.047031	-0.0642614	-0.438404	0.110594	-0.0444124	0.109214	-0.182877	-0.0110242		0.045221	0.620177						0.00494388		-0.129314	0.019746	-0.200799	-0.0596639				-1.23113		-0.354961		-0.0927621					0.069197	0.0161165	0.0191769
TG-GATES	Rat	Liver	vivo	bolus	TG-RVivoLiverSingle - bromoethylamine.Low.3hr	Bromoethylamine	L		3h	0.0561694	0.129407		0.0749946	0.104674	-0.0613902	-0.00611483	0.565708	0.243493	0.067196	-0.111856		-0.0521283	0.0558436						-0.0766761		0.406046	-0.0526999	-0.402303	0.0162552				-0.208669		0.0281217		0.102182					0.149595	-0.151789	0.0491351
TG-GATES	Human	Liver	vitro	bolus	TG-HVitro PHH - dexamethasone.Middle.24hr	Dexamethasone	M		24h	0.0368555	0.129669	-0.110689	0.164212	0.0813218	-0.103398	-0.0925323	-0.0389206	0.078173	0.0281716	0.0607322	-0.13121		-0.0464886	0.0975556	-0.0481951	0.142894	-0.0145762	-0.0479326	0.0199633	-0.142235	-0.274663	-0.0306704	-0.023041		0.100837	-0.0313967	-0.360044	0.0157651	0.0696238	-0.0102855	-0.098498	-0.123689	0.0827245	-0.0124429	0.0648496	-0.0978844	-0.140922		0.0559718
TG-GATES	Rat	Kidney	vivo	repeat	TG-RVivoKidneyRepeat - enalapril.Middle.8day	Enalapril	M		8d	0.0230959	0.12974	0.0717023	1.69696	0.381605	-0.0206794	0.143676	0.0684691	0.0358724	-0.0613508	-0.0873797	0.182455	0.170327	-0.0712696		-0.159937			-0.0889182	-0.143114	0.110242	0.035991	0.117712	-0.230949	0.112921				0.266592		0.117819		0.210732				-0.140728	-0.0037791	0.221473	0.218279
TG-GATES	Rat	Liver	vivo	repeat	TG-RVivoLiverRepeat - cisplatin.Low.29day	Cisplatin	L		29d	-0.0354105	0.129819		0.0176709	0.246212	-0.0241082	-0.0725103	-0.439526	0.0842986	-0.191038	-0.0375324		-0.116121	-0.393561						-0.0599251		0.138376	0.0148681	-0.151835	-0.191534				0.149104		-0.268347		0.654272					-0.191361	-0.212576	-0.0278309
TG-GATES	Rat	Liver	vivo	bolus	TG-RVivoLiverSingle - bromoethylamine.Middle.6hr	Bromoethylamine	M		6h	0.127938	0.129828		-0.293244	0.0315206	0.206345	-0.202962	-0.0456746	0.0138074	-0.139457	0.111162		0.232969	-0.0663017						-0.119815		0.548738	-0.171509	0.15506	0.0399421				-0.546252		-0.106768		0.430952					-0.0295432	0.262644	0.0297072
TG-GATES	Rat	Liver	vivo	repeat	TG-RVivoLiverRepeat - nitrosodiethylamine.Middle.29day	Nitrosodiethylamine	M		29d	-0.287129	0.129899		0.742195	0.611658	0.486494	0.141689	-0.594767	0.504756	-0.816095	0.108856		0.0693627	0.192232						-0.205454		-0.274081	-0.129058	-0.0822202	-0.0689755				-1.59109		-0.29844		3.01942					-0.196747	0.164567	-0.114033
TG-GATES	Human	Liver	vitro	bolus	TG-HVitro PHH - methyldopa.High.24hr	Methyldopa	H		24h	-0.0325217	0.12993	-0.0696584	0.172746	-0.0105391	0.0487362	-0.0495747	0.0280981	0.0689904	0.118319	0.0150988	-0.0623745		-0.00712159	0.00194016	-0.0228164	0.0408984	-0.0358346	0.0858068	-0.0324271	0.0686957	-0.0612663	0.103788	-0.0152391		0.0804884	0.0355949	0.203941	0.104912	0.063601	0.0517405	0.0701581	0.124903	-0.0267834	0.0889869	0.0106943	0.0891363	0.0281067		-0.0726043
TG-GATES	Rat	Liver	vivo	repeat	TG-RVivoLiverRepeat - phenytoin.High.29day	Phenytoin	H		29d	0.0187939	0.129945		0.374696	0.728178	-0.204364	-0.0789731	0.0697012	0.0723833	-0.0728842	0.0220375		-0.143378	-0.328385						-0.0676405		0.411507	0.0832275	0.0112546	0.163824				0.784713		-0.0182973		1.95273					-0.122901	0.107524	-0.0121985
carcinoGENOMICS	Human	Kidney	vitro	bolus	CX HVitro RPTEC 6h - DLM vs DMSO	DL Menthol	IC10	10000	6h	-0.183017	0.13	0.107874	-2.04506	0.0658636	0.0807877	-0.134285	0.0874825		-0.166308	-0.277475	0.00704861		2.7423	1.23911	0.496333	0.620454	0.326575	-0.219641	-0.278185	0.645831	0.0176601	1.3632	0.653066		-0.000514984	-0.342814	0.455423	-0.231616		0.276147	-0.50876	-0.113699	1.21677	-0.563061	0.0874882	-0.133812	0.460452	0.0748773	-3.63295
TG-GATES	Rat	Liver	vitro	bolus	TG-Rvitro PRH - haloperidol.Middle.2hr	Haloperidol	M		2h	0.0978682	0.130046		0.167491	0.0694578	0.268183	-0.0389239	-0.0973541	0.0618713	0.205146	-0.0369859	0.0677409	-0.0935639	-0.527089	0.0372405	0.00507482			-0.00455639	0.0252575	0.117162	0.134004	0.163058	0.12305	0.0346273				0.0601008		-0.187637		-0.101976				0.0172164	-0.121225	-0.201303	-0.0427496
TG-GATES	Rat	Liver	vivo	repeat	TG-RVivoLiverRepeat - propranolol.High.15day	Propranolol	H		15d	-0.0918207	0.130061		-0.167687	1.36928	0.129588	-0.0423738	-0.66326	-0.072734	-0.160457	0.0936097		0.380055	-0.407138						-0.0155926		0.125981	-0.0361891	0.263475	-0.223903				0.272268		-0.190317		1.69325					0.253063	0.0668595	-0.0564971
TG-GATES	Rat	Liver	vivo	repeat	TG-RVivoLiverRepeat - 2,4-dinitrophenol.High.8day	2,4-dinitrophenol	H		8d	0.0345756	0.130151		0.227546	0.105363	-0.101457	-0.0373863	0.261869	0.0405548	0.225408	0.0819772		0.260856	-0.56286						-0.128777		0.0579585	0.0386944	-0.313335	-0.0551118				-0.390276		0.015011		0.506097					0.0804587	-0.181736	-0.0130452
TG-GATES	Human	Liver	vitro	bolus	TG-HVitro PHH - phenylanthranilic acid.High.24hr	Phenylanthranilic acid	H		24h	0.0277775	0.130335	-0.00230642	0.475634	0.564785	-0.127588	0.137278	-0.302889	0.419745	0.556174	-0.407754	-0.0373915		-0.0337067	-0.06968	0.0921054	0.123447	-0.0590532	-0.0558405	0.0960458	-0.00651572	0.145509	0.212518	0.0995367		-0.044084	0.312254	-0.393096	0.201625	-0.000478121	0.0654608	-0.102877	-0.229826	-0.0682954	0.126831	0.255075	-0.0545668	0.0538239		-0.136212
TG-GATES	Rat	Liver	vivo	bolus	TG-RVivoLiverSingle - gefitinib.High.6hr	Gefitinib	H		6h	0.0482598	0.130436		0.0380247	0.667208	0.271478	0.0841811	0.0327647	-0.00169721	-0.247764	0.0551345		0.214991	0.538379						-0.0790154		0.448734	0.168583	-0.148315	0.0148824				-0.242314		-0.234705		0.491079					-0.147014	-0.520834	-0.0380985
TG-GATES	Rat	Liver	vitro	bolus	TG-Rvitro PRH - mefenamic acid.High.2hr	Mefenamic acid	H		2h	0.0507339	0.130473		0.0418102	0.0812688	0.0617894	0.00520964	0.312024	-0.0349436	0.141634	0.0228863	-0.14904	0.525375	-0.0574291	-0.0163961	0.00326541			0.0450467	-0.155257	0.0508867	0.169223	0.0175247	0.224557	0.172745				-0.177679		-0.440549		-0.0407052				-0.107832	0.158407	0.0256374	-0.00904943
TG-GATES	Rat	Liver	vivo	bolus	TG-RVivoLiverSingle - amitriptyline.Low.9hr	Amitriptyline	L		9h	-0.023477	0.13059		-0.193884	0.322179	-0.00215875	-0.0258602	-0.0860154	0.248823	-0.254702	0.0317824		0.0273531	-0.333361						-0.0805897		0.137708	-0.0362474	-0.0525474	-0.127006				0.877441		0.0691702		0.837895					0.0569436	0.246275	-0.0235339
TG-GATES	Rat	Liver	vivo	bolus	TG-RVivoLiverSingle - gentamicin.High.24hr	Gentamicin	H		24h	-0.0968505	0.130752		-0.30145	-0.0255453	0.0311387	-0.0826819	-0.667469	0.0513731	-0.168737	-0.00707264		-0.198826	-0.588339						-0.193169		0.335951	0.0832788	-0.189776	-0.0294663				-0.0646106		-0.201751		-0.55566					0.0554943	0.172352	0.0204066
TG-GATES	Rat	Liver	vivo	repeat	TG-RVivoLiverRepeat - nicotinic acid.High.4day	Nicotinic acid	H		4d	0.117358	0.130885		-0.0674771	0.01837	-0.183131	-0.0103892	-0.0575683	-0.027536	0.123541	-0.0968168		0.237514	0.0510233						-0.0684332		0.40062	0.0850429	0.0566754	0.108865				0.0841317		-0.0555389		-0.0982472					0.0192158	0.358728	-0.0157067
TG-GATES	Rat	Liver	vivo	bolus	TG-RVivoLiverSingle - N-methyl-N-nitrosourea.Middle.24hr	N-methyl-N-nitrosourea	M		24h	-0.0687529	0.130956		-0.281001	0.120136	-0.109782	0.0127403	-0.395409	-0.106513	-0.401275	0.189445		-0.14847	-0.967474						-0.177969		-0.297445	-0.100006	0.0271499	-0.155171				-0.37532		-0.547114		0.933014					0.178923	-0.12699	-0.00869902
TG-GATES	Rat	Liver	vivo	repeat	TG-RVivoLiverRepeat - dantrolene.Middle.8day	Dantrolene	M		8d	-0.00251696	0.131056		0.187875	0.657529	-0.0376352	0.191383	-0.201874	0.18299	-0.371577	0.0151034		-0.0259519	-0.427807						0.0811293		0.249509	-0.0945333	0.0720856	-0.0716903				-0.114313		-0.172204		2.43773					0.137119	0.437199	-0.0632553
TG-GATES	Rat	Liver	vivo	repeat	TG-RVivoLiverRepeat - moxisylyte.Middle.29day	Moxisylyte	M		29d	0.0116337	0.13107		0.231734	-0.00190672	-0.0144765	-0.117016	-0.0462022	0.060835	0.154988	0.368113		0.0621142	0.216946						0.0196713		0.211409	-0.0920691	0.119283	0.0367873				0.394715		0.240506		0.527939					0.0530862	0.347764	0.0293672
TG-GATES	Rat	Liver	vivo	repeat	TG-RVivoLiverRepeat - gentamicin.Middle.29day	Gentamicin	M		29d	-0.0749628	0.131173		-0.184908	0.0395135	-0.397161	-0.0852548	0.338481	0.0285077	-0.797101	-0.0837737		0.0470588	0.202701						-0.146058		0.0108863	-0.0557929	-0.255885	0.0209277				0.71524		-0.142624		-0.686708					0.00543074	0.356302	-0.00473865
TG-GATES	Rat	Liver	vivo	repeat	TG-RVivoLiverRepeat - griseofulvin.Middle.15day	Griseofulvin	M		15d	-0.0583466	0.131411		0.0106262	0.365423	0.0361262	-0.127863	-0.0927202	0.00442704	0.114593	-0.163281		0.11273	-0.26826						-0.0269327		-0.227806	0.0803394	-0.0747849	-0.179281				0.149501		0.289578		0.938758					-0.109382	-0.180751	0.00443033
TG-GATES	Rat	Liver	vivo	repeat	TG-RVivoLiverRepeat - nifedipine.High.15day	Nifedipine	H		15d	0.273955	0.131419		0.486142	2.64667	0.278865	-0.11457	-0.404402	0.122592	-0.191858	-0.275607		0.119369	-0.0249078						-0.00817472		0.600241	0.207833	0.392544	0.064708				0.42385		-0.294548		3.32878					0.177326	-0.14561	-0.0530966
TG-GATES	Rat	Liver	vivo	repeat	TG-RVivoLiverRepeat - tetracycline.High.29day	Tetracycline	H		29d	-0.103922	0.13152		-0.179762	-0.0599098	0.0292451	-0.0305327	0.294558	0.0198899	0.032224	-0.0386795		0.077858	0.667192						-0.0320345		0.35851	0.0896513	-0.104879	-0.0251683				0.337344		0.127856		1.14644					0.180831	-0.459234	-0.0286571
TG-GATES	Rat	Liver	vivo	bolus	TG-RVivoLiverSingle - aspirin.Low.24hr	Aspirin	L		24h	0.092124	0.131658		-0.309	0.0185911	0.199714	0.0134396	0.141697	0.0699404	-0.564531	-0.181497		2.22747	0.531871						0.0631524		-0.302522	0.0586605	0.38621	-0.300144				0.810374		-0.329751		1.44375					0.0854648	0.0517481	-0.0505639
TG-GATES	Human	Liver	vitro	bolus	TG-HVitro PHH - acetamidofluorene.Middle.24hr	Acetamidofluorene	M		24h	-0.0886691	0.131689	-0.0407794	0.0946125	0.0266386	0.0779775	0.0163195	-0.0287057	-0.0364579	-0.386964	-0.0591809	-0.0328185		-0.0934557	-0.00160389	-0.0599449	-0.043486	-0.165816	0.0754179	-0.0255518	-0.01424	0.0815855	-0.229079	0.00154021		0.143259	0.183181	0.107411	0.0488678	0.00424321	0.0168031	-0.0203341	-0.0560252	-0.102594	-0.0439402	0.0578944	0.0153401	-0.167154		0.00608006
TG-GATES	Rat	Liver	vivo	repeat	TG-RVivoLiverRepeat - allyl alcohol.Low.4day	Allyl alcohol	L		4d	-0.00964364	0.131817		0.462301	-0.013032	-0.433677	-0.0342052	-0.138688	-0.0705093	-0.371939	-0.0768828		-0.01116	0.389168						0.0619964		0.203994	0.0460554	-0.102464	0.115212				0.397719		-0.149913		0.627583					0.0657599	0.0782284	0.0141569
TG-GATES	Rat	Liver	vitro	bolus	TG-Rvitro PRH - danazol.High.2hr	Danazol	H		2h	0.153721	0.131882		0.0386264	0.236997	-0.409336	0.312321	-0.0311202	0.00502693	0.373566	0.0942423	-0.0571965	0.0945851	-0.093467	-0.0576155	0.126087			-0.111362	-0.287786	-0.101721	-0.383076	0.0287647	-0.400425	0.0555285				-0.440778		-0.298223		-0.123778				0.0291961	0.151876	-0.097381	0.0264633
TG-GATES	Rat	Liver	vivo	bolus	TG-RVivoLiverSingle - ranitidine.Low.6hr	Ranitidine	L		6h	0.103165	0.132012		0.280909	0.548659	0.10902	0.0670128	-0.372893	0.0727904	-0.135256	0.0612317		-0.135216	0.252404						-0.146689		-0.15103	-0.00888308	-0.0441737	0.139427				0.0474194		-0.13811		0.1649					0.0604851	0.282018	-0.0141876
TG-GATES	Rat	Liver	vitro	bolus	TG-Rvitro PRH - bromoethylamine.Middle.24hr	Bromoethylamine	M		24h	-0.0884464	0.132044		0.275339	0.163728	0.0920611	-0.0698263	0.0072845	-0.0176349	-0.0203126	0.167919	-0.0640971	-0.1769	-0.108303	-0.153265	-0.0514409			0.070894	-0.0631064	0.202121	0.20842	0.0696948	0.277976	-0.244402				0.324105		0.21		0.804708				-0.16097	-0.0569667	0.315344	-0.112099
TG-GATES	Rat	Liver	vivo	repeat	TG-RVivoLiverRepeat - colchicine.High.15day	Colchicine	H		15d	-0.159893	0.132087		0.215688	0.323049	0.104055	0.143531	-0.643897	0.192699	0.205484	-0.110303		0.10157	-0.233052						0.0736553		0.0489814	-0.0528791	-0.0549518	-0.00406417				0.522652		-0.135849		1.22237					-0.179806	0.132348	-0.0084844
TG-GATES	Rat	Kidney	vivo	repeat	TG-RVivoKidneyRepeat - triamterene.Low.29day	Triamterene	L		29d	0.0436521	0.132101	0.0777674	0.0977823	0.104288	-0.0449556	0.15666	0.0832109	0.0645707	0.296859	-0.0266198	0.106543	-0.0736951	0.238392		0.231711			-0.0179485	-0.0409297	-0.067338	0.124492	0.121672	-0.226047	-0.034158				0.850463		0.0744033		0.00502306				-0.0086677	0.148165	-0.0542874	0.0670959
TG-GATES	Rat	Liver	vivo	bolus	TG-RVivoLiverSingle - bendazac.Low.24hr	Bendazac	L		24h	-0.0698656	0.132157		-0.142295	0.794508	0.361423	0.155998	0.0824882	0.0338883	-0.151384	-0.156509		0.358694	0.410193						0.0247603		-0.0852739	-0.088168	0.0140292	-0.244477				-1.08226		-0.30939		0.931344					0.0119914	-0.248579	0.0126275
TG-GATES	Rat	Liver	vivo	bolus	TG-RVivoLiverSingle - sulfasalazine.High.9hr	Sulfasalazine	H		9h	0.00754296	0.132692		0.114664	0.0766526	-0.234437	-0.174433	-0.0205438	0.248769	-0.328007	-0.177999		0.0733681	0.216018						0.118078		0.871174	0.0612812	-0.118399	0.0558414				0.2612		-0.205426		0.105832					0.0604853	-0.00323953	-0.0802734
TG-GATES	Rat	Liver	vivo	repeat	TG-RVivoLiverRepeat - diltiazem.Low.4day	Diltiazem	L		4d	0.00596876	0.132865		-0.215163	0.26787	0.240134	0.105973	-0.162892	0.00595162	-0.0832775	0.00751359		-0.550822	-0.178353						0.0257378		0.0723014	-0.0091063	-0.239173	-0.05075				-0.889926		0.0368207		-0.0788973					0.0608537	0.0319935	0.00970507
TG-GATES	Rat	Liver	vivo	repeat	TG-RVivoLiverRepeat - colchicine.Middle.4day	Colchicine	M		4d	-0.236426	0.133049		-0.410905	-0.0990847	-0.178289	0.0991985	0.0937757	0.0994557	-0.102128	0.0469577		0.171197	0.0982652						-0.0891021		0.422625	0.122517	0.0410675	-0.0559167				-0.943921		0.308804		0.550955					-0.0499658	-0.0745915	0.0559681
TG-GATES	Rat	Liver	vivo	bolus	TG-RVivoLiverSingle - sulfasalazine.Middle.9hr	Sulfasalazine	M		9h	-0.050648	0.1331		-0.136555	-0.0796134	-0.292427	0.13946	-0.270701	-0.050907	0.0406079	-0.0368946		-0.155407	0.741324						-0.0183648		0.55872	0.115124	-0.0853438	-0.0525383				-0.400219		0.115377		0.175314					0.0122668	0.0731349	-0.0231605
TG-GATES	Rat	Liver	vitro	bolus	TG-Rvitro PRH - moxisylyte.Middle.24hr	Moxisylyte	M		24h	0.0316649	0.133235		-0.0758171	0.14661	-0.12188	0.0373974	0.0436588	0.0343398	0.213526	0.00471259	0.0619747	-0.0553351	-0.0324264	0.106184	0.0605944			-0.212363	-0.115868	0.0831162	-0.0944693	-0.132186	0.0391292	0.110058				-0.0251052		-0.551461		-0.378064				-0.135205	0.056095	-0.132238	-0.0146617
TG-GATES	Human	Liver	vitro	bolus	TG-HVitro PHH - perhexiline.High.2hr	Perhexiline	H		2h	0.0767648	0.133365	-0.085021	-0.0751836	-0.0759796	0.118674	-0.0481108	0.045476	-0.0577627	0.0548413	0.0387863	0.0417503		0.0519464	0.00786523	0.0728154	-0.00345639	-0.132879	0.0976786	0.0556451	0.0446023	0.0587288	-0.183935	-0.022159		-0.043347	0.0390424	0.0676048	0.00313737	-0.0351094	-0.00535083	-0.0401663	-0.0644439	0.0649843	0.150702	0.0400405	0.077763	-0.0469836		0.0596255
TG-GATES	Rat	Liver	vivo	bolus	TG-RVivoLiverSingle - ethambutol.Middle.24hr	Ethambutol	M		24h	-0.0798338	0.133409		0.068624	0.636027	0.119567	-0.301915	0.228871	-0.0403434	-0.325668	0.0525741		0.119311	-0.170788						-0.0447707		-0.00656182	-0.0147521	0.285422	-0.296468				-0.409504		-0.100839		1.71909					-0.0213127	0.0162723	-0.0204375
TG-GATES	Rat	Liver	vivo	bolus	TG-RVivoLiverSingle - butylated hydroxyanisole.Low.3hr	Butylated hydroxyanisole	L		3h	-0.0445202	0.133431		-0.1328	-0.567363	-0.258843	-0.0346286	0.0784056	0.0378835	0.340094	-0.116559		-0.0369331	0.152043						0.14305		0.462261	0.0376054	-0.238437	0.0553646				0.508744		0.154033		-0.108334					-0.136533	-0.398722	0.0232761
TG-GATES	Rat	Liver	vitro	bolus	TG-Rvitro PRH - nifedipine.High.8hr	Nifedipine	H		8h	0.2773	0.133546		0.0523614	-0.122317	0.0568315	-0.150559	-0.376512	0.033865	0.255554	-0.145013	0.238203	0.278266	-0.531703	-0.214681	0.274797			-0.265853	0.362512	-0.304359	-0.247701	0.194548	-0.558906	-0.303855				-0.278452		-0.246211		-0.882638				0.31472	0.0843945	0.288831	0.0231343
TG-GATES	Rat	Liver	vivo	repeat	TG-RVivoLiverRepeat - doxorubicin.Middle.4day	Doxorubicin	M		4d	-0.231166	0.133729		-0.406231	-0.0450243	-0.196348	-0.0510482	0.423473	0.0635299	0.0058445	0.159961		-0.0397211	-0.389399						0.0718747		0.167615	0.0316606	0.228722	-0.108554				0.788946		0.11409		0.131553					0.0826691	0.078591	-0.0266993
TG-GATES	Rat	Liver	vivo	repeat	TG-RVivoLiverRepeat - phenobarbital.Low.15day	Phenobarbital	L		15d	-0.0827329	0.133826		-0.0155828	0.56475	0.0271803	0.0129332	-0.467192	0.126461	-0.44468	-0.133207		0.00148185	-1.27259						0.0375712		0.620546	-0.00981603	0.029507	-0.251126				-0.289439		-0.27531		2.96626					0.0827232	-0.0712986	0.0183142
TG-GATES	Rat	Liver	vivo	repeat	TG-RVivoLiverRepeat - triazolam.High.15day	Triazolam	H		15d	-0.145584	0.133833		-0.0433853	0.328393	0.0974577	-0.0289524	-0.634081	0.00602222	0.138436	-0.244124		0.110223	0.125772						0.111108		-0.0941939	0.038489	-0.0117561	-0.0148741				0.596089		0.174791		1.07221					0.07854	-0.215085	-0.0352233
TG-GATES	Human	Liver	vitro	bolus	TG-HVitro PHH - coumarin.Low.24hr	Coumarin	L		24h	-0.00651944	0.134116	0.0182457	0.175439	0.129594	0.0542772	-0.0403169	-0.0622037	-0.0427559	-0.00483247	0.00398655	-0.146037		0.0012674	-0.0399753	0.114334	-0.0382137	-0.0620841	0.0112572	0.0411095	-0.0595659	-0.280862	0.00422546	0.00937916		-0.117122	0.0122374	0.13584	0.0447276	0.0181966	-0.0373752	0.0415545	0.027705	0.0508175	-0.0571882	-0.025721	0.0643765	0.170006		0.00830759
TG-GATES	Rat	Liver	vitro	bolus	TG-Rvitro PRH - nifedipine.Middle.24hr	Nifedipine	M		24h	0.000259488	0.134138		0.173057	0.399319	-0.198168	-0.0360576	-0.222106	-0.172838	-0.175076	0.158913	-0.0644251	0.20457	0.499744	-0.110185	-0.0181843			-0.0806174	-0.0472214	0.0102056	-0.150755	0.302767	0.0368423	-0.137509				0.147679		-0.571359		-0.184816				-0.00665828	0.0248582	0.0964191	0.0548505
TG-GATES	Rat	Liver	vivo	repeat	TG-RVivoLiverRepeat - diazepam.Middle.4day	Diazepam	M		4d	-0.0717927	0.134195		-0.155437	0.545632	-0.450151	0.141787	-0.103963	0.0729413	-0.0816667	-0.0437221		0.0699349	-0.159903						-0.0648774		0.602177	0.0121407	-0.078782	0.136899				0.525075		0.257821		0.838163					0.175579	-0.240845	-0.0475485
TG-GATES	Rat	Liver	vivo	repeat	TG-RVivoLiverRepeat - bromobenzene.Middle.4day	Bromobenzene	M		4d	-0.0509238	0.134287		-0.000272797	2.01898	-0.0964888	0.0888197	-0.0813778	0.0733134	0.153037	0.21424		0.552068	-0.692139						-0.0210767		-0.307365	-0.00314332	0.0859704	-0.259119				-0.783764		0.17827		1.43349					-0.0901888	0.0282943	-0.0523014
TG-GATES	Rat	Liver	vivo	bolus	TG-RVivoLiverSingle - methimazole.Low.6hr	Methimazole	L		6h	-0.0186186	0.134334		0.0227092	0.153018	1.84921	-0.229532	0.0291981	0.471057	-0.373438	-0.0632216		0.224109	-0.183577						-0.206277		-0.141444	-0.0977188	0.0343184	-0.160643				-1.13711		-0.0207288		0.617717					0.0645621	-0.204233	0.0114015
TG-GATES	Rat	Liver	vivo	bolus	TG-RVivoLiverSingle - methyltestosterone.Middle.24hr	Methyltestosterone	M		24h	-0.0431632	0.134342		-0.060872	-0.0592119	0.398081	-0.240046	-0.0693846	-0.103159	-0.257244	0.00358313		0.2488	0.148156						-0.0305474		-0.0760706	-0.230129	0.0349726	-0.127662				-0.904668		-0.0371103		0.621675					-0.110742	-0.118376	0.00678302
TG-GATES	Rat	Liver	vivo	repeat	TG-RVivoLiverRepeat - diltiazem.High.8day	Diltiazem	H		8d	-0.110865	0.134444		0.377237	2.87373	0.342924	-0.14775	-0.830595	-0.0263558	-0.353081	-0.0297124		0.231033	-0.34677						-0.0729864		0.295957	-0.0169276	0.38269	-0.0492059				0.153327		0.27176		2.61702					-0.124385	0.060379	0.0117618
TG-GATES	Rat	Liver	vivo	bolus	TG-RVivoLiverSingle - imipramine.Middle.24hr	Imipramine	M		24h	-0.00436353	0.134457		-0.218337	0.83217	-0.0743536	-0.0848068	-0.135949	-0.037052	-0.210284	0.262918		0.0546389	-0.0535617						0.0699945		-0.143096	-0.00579668	0.148841	0.033138				-1.05812		-0.677967		0.881964					0.00479544	0.090873	-0.014196
TG-GATES	Rat	Liver	vitro	bolus	TG-Rvitro PRH - bromobenzene.Middle.2hr	Bromobenzene	M		2h	-0.0402597	0.134467		-0.097647	0.0724457	-0.0602963	-0.109428	-0.114001	0.0342507	-0.0805296	0.0201389	-0.0575008	-0.0787999	-0.681048	-0.194539	-0.098269			0.0630798	0.0743525	-0.00241393	-0.0782604	0.00785409	-0.0112129	0.062889				0.140905		-0.173609		-0.191032				-0.147048	0.169371	-0.0959306	0.0354989
TG-GATES	Rat	Kidney	vivo	repeat	TG-RVivoKidneyRepeat - captopril.Low.15day	Captopril	L		15d	-0.00912282	0.134522	-0.0308435	0.185815	0.0612349	-0.175355	0.0920579	0.0444584	-0.0971169	0.164242	0.0027565	-0.103837	-0.165996	0.391723		0.0845858			-0.0325411	0.0267607	0.0322177	-0.153959	-0.206577	-0.166204	-0.101081				0.190529		0.0319488		-0.0174159				-0.0385529	-0.144596	0.013882	0.254345
TG-GATES	Rat	Liver	vivo	bolus	TG-RVivoLiverSingle - 2,4-dinitrophenol.Low.6hr	2,4-dinitrophenol	L		6h	0.114354	0.134528		0.293162	-0.298908	0.178207	0.100631	-0.194508	0.131662	0.165423	-0.0151935		0.268848	0.76434						0.0289877		0.258891	0.0307672	-0.049914	-0.044779				-0.3338		0.00749057		-0.254699					-0.0411582	0.362976	-0.00535147
TG-GATES	Rat	Liver	vivo	repeat	TG-RVivoLiverRepeat - tolbutamide.Middle.8day	Tolbutamide	M		8d	-0.068752	0.134546		0.311517	0.52731	0.0593568	0.117911	-0.0645591	0.0805379	0.432831	-0.057811		-0.0079429	0.190556						-0.0918535		0.0736562	0.0246114	0.181209	-0.101257				-0.303346		-0.194264		1.36943					0.0384453	0.230143	-0.0382442
TG-GATES	Rat	Liver	vivo	bolus	TG-RVivoLiverSingle - acetazolamide.Low.6hr	Acetazolamide	L		6h	-0.458551	0.134573		-0.227101	-0.34847	-0.130479	-0.135552	0.482707	0.0575205	-0.058939	0.032759		0.224329	-0.369949						-0.0492231		-0.195806	-0.0459006	-0.141819	0.0343671				0.264837		0.401136		-0.564969					0.123926	0.0302551	0.0239982
TG-GATES	Rat	Liver	vitro	bolus	TG-Rvitro PRH - azathioprine.Low.2hr	Azathioprine	L		2h	-0.046977	0.134594		-0.0338895	-0.0158734	-0.0874759	-0.00211087	-0.16555	-0.0802447	0.0769715	-0.0233347	0.0662765	0.00531984	-0.203975	0.073398	0.0564543			0.0907102	-0.0424981	-0.0139332	0.184372	0.0160537	-0.00276276	0.0759179				0.0168098		0.115052		0.0690821				0.00119707	0.0630896	-0.0628652	-0.00206141
TG-GATES	Rat	Liver	vivo	repeat	TG-RVivoLiverRepeat - erythromycin ethylsuccinate.Middle.8day	Erythromycin	M		8d	0.0635767	0.134632		0.0782973	0.112452	-0.25047	0.144943	0.509069	0.00550461	-0.324741	0.104266		0.0307316	0.502053						0.0368628		0.576175	-0.110276	-0.0814223	0.23599				0.217243		0.472772		-0.572311					-0.256613	0.0828424	0.0491759
TG-GATES	Human	Liver	vitro	bolus	TG-HVitro PHH - ethionamide.High.8hr	Ethionamide	H		8h	-0.149479	0.134927	0.105362	-0.103756	-0.0970877	-0.0808568	-0.144328	-0.252099	0.0583185	0.285117	0.323946	-0.0393249		-0.174051	0.140295	0.0654819	-0.0184921	0.242242	0.0375977	0.0774379	-0.0862756	-0.245583	0.172687	-0.10342		-0.0686624	0.0556935	-0.723013	-0.000560161	0.0504853	-0.0945816	-0.0481056	-0.447412	0.166248	0.175157	0.0140101	-0.00971571	-0.0317011		0.0261366
TG-GATES	Rat	Liver	vivo	bolus	TG-RVivoLiverSingle - clofibrate.Middle.9hr	Clofibrate	M		9h	-0.112126	0.13499		-0.640728	0.0430195	-0.111161	-0.0123843	0.199355	-0.0130426	-0.275401	0.0288495		2.03132	-0.314469						-0.129994		-0.0793682	0.100035	0.242334	0.141085				-0.13992		-0.21162		1.32588					-0.0193401	0.0623508	-0.0367974
TG-GATES	Human	Liver	vitro	bolus	TG-HVitro PHH - cimetidine.Middle.2hr	Cimetidine	M		2h	-0.0493451	0.135048	0.00772482	0.0177159	-0.0327275	-0.112844	0.0430178	-0.064248	0.0479139	0.00634079	-0.0257392	0.0388439		-0.0372109	0.126677	0.0283211	-0.09328	0.0235999	0.00868188	0.0314763	0.0662681	0.0194818	0.0573134	0.0694724		-0.0783608	0.0968772	-0.181879	-0.0145565	-0.012114	0.000120839	-0.0547519	-0.247515	-0.0195377	-0.0265165	0.018667	0.0162291	0.121971		-0.0561772
TG-GATES	Human	Liver	vitro	bolus	TG-HVitro PHH - galactosamine.Middle.8hr	Galactosamine	M		8h	-0.0138915	0.135079	-0.00642107	-0.0713446	0.0226844	-0.0640353	-0.019418	0.0550878	0.0696943	-0.0792457	0.0322492	-0.0408267		-0.0606949	-0.000179175	0.0485745	-0.0386784	-0.116291	-0.0467267	-0.0983267	0.0248334	0.0642157	-0.00787732	-0.0370554		0.130611	-0.0325689	0.0371838	0.0426741	0.0254029	0.0724701	-0.0141892	0.0949227	0.0269847	0.0727014	0.0716265	0.0469995	0.0604228		0.014188
TG-GATES	Human	Liver	vitro	bolus	TG-HVitro PHH - phenylbutazone.High.8hr	Phenylbutazone	H		8h	0.00247937	0.135104	0.0371069	0.273554	-0.026113	-0.180552	-0.0733694	0.0263465	0.136374	-0.087805	-0.0938851	0.106835		0.0364522	0.0637787	0.0263014	0.0300857	-0.135142	-0.0482414	0.0982236	-0.0180056	0.0913246	-0.0599311	0.0766427		0.135459	0.0733727	0.21292	0.14718	0.0795628	0.162297	-0.18074	-0.025917	-0.110331	0.0908989	0.171678	0.0418507	-0.0374883		0.0344005
TG-GATES	Rat	Liver	vivo	repeat	TG-RVivoLiverRepeat - chlorpheniramine.Middle.15day	Chlorpheniramine	M		15d	-0.0423848	0.13529		-0.184702	0.214737	-0.188142	-0.0385269	-0.379017	-0.0766954	0.425401	0.00330699		-0.244297	-0.00715234						0.0876384		-0.044116	-0.14394	0.152631	0.263979				-0.403339		-0.0375275		0.249239					-0.189127	0.359474	0.0104197
TG-GATES	Rat	Liver	vivo	repeat	TG-RVivoLiverRepeat - iproniazid.Middle.29day	Iproniazid	M		29d	-0.00149343	0.135343		-0.158081	-0.0394246	-0.0114565	-0.00805919	0.193296	-0.0163156	-0.0435135	0.128167		0.0950094	-0.390021						0.0661778		0.0324941	0.0225804	0.154713	-0.0360695				-0.552093		0.0359131		1.27273					0.10089	-0.173253	0.00706159
TG-GATES	Rat	Liver	vivo	bolus	TG-RVivoLiverSingle - tamoxifen.High.3hr	Tamoxifen	H		3h	0.0129648	0.13538		-0.00379631	0.029456	-0.0842589	0.0153223	-0.249746	0.00100338	0.0269047	0.183361		-0.110168	0.0565096						-0.0680833		0.121699	0.0960033	0.0782698	0.0541722				-0.719418		-0.0625115		0.331497					-0.0203992	-0.0456276	-0.00293268
TG-GATES	Rat	Liver	vivo	repeat	TG-RVivoLiverRepeat - phenytoin.Low.29day	Phenytoin	L		29d	0.0903194	0.135401		0.282055	-0.111335	-0.2052	-0.109324	0.0673841	-0.139454	-0.178131	0.0893757		-0.203147	-0.446265						0.0407141		0.053168	-0.0586549	0.160357	0.0181323				0.755512		0.00322145		0.534399					0.0958495	0.0534656	0.000841712
TG-GATES	Rat	Liver	vivo	bolus	TG-RVivoLiverSingle - acetaminophen.Low.24hr	Acetaminophen	L		24h	-0.209625	0.135426		-0.284874	0.907251	-0.075616	-0.0641802	0.00662548	0.0372182	-0.0591019	0.0792872		0.223959	0.21168						-0.0216341		-0.0125568	0.0438625	-0.0372891	0.04769				-0.707993		0.191636		0.958847					0.254897	-0.395305	-0.00128529
TG-GATES	Human	Liver	vitro	bolus	TG-HVitro PHH - tiopronin.High.24hr	Tiopronin	H		24h	-0.00377927	0.135507	0.0139033	0.0162325	0.0138362	-0.00799212	-0.0450445	-0.23149	-0.0779161	-0.0356221	0.0630284	-0.18788		0.381041	0.101587	9.96769e-05	0.0880709	-0.00440896	0.026666	-0.0867562	-0.359585	-0.161075	0.0324002	-0.0613999		-0.0980019	-0.00627606	-0.042958	0.0344512	0.0719406	0.00403538	0.0119721	0.0579213	-0.155795	0.123498	0.0550956	-0.0966286	-0.0284716		0.0248203
TG-GATES	Rat	Liver	vivo	repeat	TG-RVivoLiverRepeat - butylated hydroxyanisole.Middle.4day	Butylated hydroxyanisole	M		4d	-0.167075	0.13552		-0.506864	2.64195	0.217951	0.0478903	-0.415249	0.220597	0.218304	0.439131		-0.0853333	-0.0723962						0.0410668		0.0183257	0.0764225	0.15212	0.0120589				-0.0593284		0.0336524		1.18409					-0.0611301	-0.36414	-0.0383677
TG-GATES	Rat	Kidney	vivo	repeat	TG-RVivoKidneyRepeat - allyl alcohol.High.4day	Allyl alcohol	H		4d	-0.0771764	0.13559	0.0884474	0.186639	0.0658286	-0.0599598	-0.245878	0.0984195	-0.0292902	-0.00800685	0.203273	0.199753	0.0609796	0.656884		0.0157965			-0.0421936	0.0833684	0.249434	-0.0369426	-0.0309552	0.00450992	0.0305694				-0.410979		-0.053017		0.109819				-0.128555	-0.199648	0.00451609	-0.118401
TG-GATES	Rat	Liver	vivo	bolus	TG-RVivoLiverSingle - terbinafine.Middle.24hr	Terbinafine	M		24h	-0.0222225	0.135696		0.0518054	-0.0917554	0.596204	-0.00201003	0.0978694	0.213103	-0.0982042	-0.144642		0.818587	0.13728						0.0202098		0.520836	-0.0685842	0.165482	0.125859				-0.136587		0.0158195		1.18365					-0.0557363	-0.276631	0.0121011
carcinoGENOMICS	Rat	Kidney	vitro	bolus	CX RVitro NRK Potassium bromate 24h (500uM)	Potassium bromate	IC10	500	24h	-0.0102278	0.135851	0.0130837	-0.00657157	-0.00306116	0.00271269	-0.188589	-0.0388363	0.107719	-0.018393		-0.00722285	-0.175742	-0.00739946	-0.0217865			-0.00832134		-0.146189		-0.466006	-0.00511587	0.0331791	0.0310963	-0.143879		-0.00808584	-0.00708454		-0.00626813	-0.0665457	-0.00661706	-0.0140954		-0.0606596	0.0641625	0.0469763	-0.0174283	-0.00653648
TG-GATES	Rat	Kidney	vivo	repeat	TG-RVivoKidneyRepeat - cephalothin.Middle.15day	Cephalothin	M		15d	-0.151762	0.136076	0.0646815	1.00946	0.288767	0.232125	-0.22999	0.0450663	-0.0829644	0.175704	-0.018307	-0.0155383	-0.0718589	0.344242		-0.101864			0.0117071	0.0378398	-0.0572102	-0.290996	0.182658	0.0596512	-0.127478				0.939667		0.167297		0.104766				-0.0571548	-0.207429	0.248186	0.0673845
TG-GATES	Rat	Kidney	vivo	repeat	TG-RVivoKidneyRepeat - captopril.Middle.29day	Captopril	M		29d	-0.146405	0.136382	-0.0676549	0.57585	0.0800225	-0.218339	0.225996	0.0337765	-0.00449897	0.107651	-0.12033	-0.0076775	0.174763	0.251729		-0.215615			-0.0260029	-0.0689504	0.104605	0.0650776	-0.0318194	-0.0521228	-0.214725				-0.0987347		0.03447		0.0389221				-0.0569875	0.0715789	0.109535	-0.0970413
TG-GATES	Rat	Liver	vivo	bolus	TG-RVivoLiverSingle - buthionine sulfoximine.Low.9hr	Buthionine sulfoximine	L		9h	-0.127142	0.13667		-0.568816	-0.11191	-0.508313	-0.173427	0.453576	0.159168	0.203976	-0.196073		0.128054	-0.873836						-0.235427		-0.341022	-0.0104015	-0.0339418	-0.00510771				-1.93263		-0.41559		-0.246357					0.0571752	-0.0716767	-0.0701145
TG-GATES	Rat	Liver	vivo	repeat	TG-RVivoLiverRepeat - carbamazepine.Middle.4day	Carbamazepine	M		4d	0.00302401	0.136692		0.322984	1.43714	0.0201523	-0.0243564	-0.280022	0.0847118	-0.00543133	0.102584		0.0919085	-0.513558						-0.0121312		0.548612	0.0654533	0.22687	-0.0832506				0.285135		0.0177603		1.90134					0.153309	-0.122307	-0.046057
TG-GATES	Rat	Kidney	vivo	bolus	TG-RVivoKidneySingle - methyltestosterone.Low.6hr	Methyltestosterone	L		6h	0.00504801	0.136803	-0.144945	0.230294	0.0847971	-0.0211793	-0.188089	0.0487616	0.0518536	-0.0284686	0.0637852	0.126932	-0.0320746	0.0677848		0.0200362			-0.0313344	0.00199538	-0.0273148	0.173146	-0.119659	-0.204861	0.0441559				-0.506184		-0.0644609		-0.0498955				-0.0128335	0.0768898	0.158686	0.0516587
TG-GATES	Rat	Liver	vivo	bolus	TG-RVivoLiverSingle - disulfiram.High.9hr	Disulfiram	H		9h	-0.159474	0.137045		-0.380122	0.425469	0.469236	0.0525041	-0.779933	0.0381394	-0.499514	-0.208319		0.254644	0.242417						0.140305		0.56097	-0.186019	-0.383464	-0.0650014				0.349779		0.126552		0.347086					0.0390306	-0.440542	-0.0273907
TG-GATES	Rat	Liver	vitro	bolus	TG-Rvitro PRH - diethyl maleate.High.8hr	Diethylmaleate	H		8h	0.00831708	0.137159		-0.465382	0.0357759	0.196879	-0.390098	-0.268506	0.104616	-0.188124	-0.323449	0.127166	0.224629	-0.0435749	0.150214	0.360098			0.149079	-0.215688	1.34137	-0.524383	-0.0503635	-0.718752	-0.975779				0.250385		0.789262		-0.313332				-0.127741	-0.282718	0.21181	0.0999074
TG-GATES	Rat	Liver	vitro	bolus	TG-Rvitro PRH - enalapril.Middle.2hr	Enalapril	M		2h	-0.0112534	0.137311		-0.142467	-0.194266	0.122147	0.0809922	-0.200889	0.0162906	-0.215373	-0.067779	0.070682	0.105379	-0.0672543	-0.13177	0.0420253			0.301188	0.0497201	-0.106667	-0.168435	0.100214	0.0330378	0.119336				-0.0453283		-0.0419356		-0.153823				-0.0545008	-0.119154	0.067551	-0.00661733
TG-GATES	Rat	Liver	vitro	bolus	TG-Rvitro PRH - bromoethylamine.High.24hr	Bromoethylamine	H		24h	-0.130596	0.137451		0.689871	0.860554	-0.277349	-0.326249	-0.239465	0.168029	-0.192707	0.278488	-0.298435	-0.56385	0.704079	-0.227389	0.0949392			0.436361	-1.01644	-0.116967	0.758671	-0.0522519	0.77866	-0.216686				0.31747		-0.676788		1.57455				-0.069696	0.105407	0.635461	-0.208883
[truncated: 988 more rows]
[truncated: 764 more columns]
